# Supplementary material for: Immunomodulatory effects of PI3Kδ inhibition in solid tumors – evaluation in a randomized phase II trial
Source: Research Square preprint supplement (doi:10.21203/rs.3.rs-337290/v1), 2021-03-19
Supplement: Supplementary file 1 [file 2048db3254e756264bfcf783.xlsx]

## Sheet: Spleen Placebo vs Treatment
Table S1. Differential gene expression analysis. Spleen Placebo vs Treatment.
	MAST - Likelihood ratio test			Mean expression (CPM)		Fraction of expressing cells (CPM>0)
Gene	Log2 fold change	P-value	Adjusted P-value	Placebo	PI3kdi	Placebo	PI3kdi
Fos	2.55	1.24537e-53	1.6135e-49	191.58	511.08	34.21	59.61
Klf6	1.62	1.58871e-31	6.86112e-28	267.06	464.27	52.57	67.7
Jun	1.22	3.92719e-16	3.63434e-13	153.1	270.78	32.97	45.39
Klf2	1.18	1.14547e-19	2.12011e-16	1281.03	1801.14	78.46	86.84
Itga4	1.09	5.98026e-17	5.96002e-14	240.13	389.11	44.09	54.08
Gm8369	1.07	1.73764e-21	4.50256e-18	267.17	398.84	59.95	69.59
Ahnak	1.07	2.02764e-09	5.58938e-07	262.26	358	40.2	51.13
Pim1	1.06	1.41271e-11	6.64577e-09	443.62	605.19	61.35	71.03
Il7r	1.05	8.25058e-11	3.34045e-08	339.39	479	49.61	59.53
Tsc22d3	1	1.13584e-15	9.34338e-13	388.89	546.21	64.07	72.62
Ighm	0.99	1.59804e-18	1.88221e-15	330.33	482.66	60.89	69.29
Hist1h1e	0.87	3.70304e-11	1.54763e-08	99.73	155.3	25.66	35.02
Itgb1	0.83	2.69213e-17	2.9066e-14	337.64	572.78	42.85	48.49
Txnip	0.82	1.15386e-15	9.34338e-13	396.86	542.02	68.27	74.51
Jund	0.81	9.03139e-31	2.92527e-27	1237.66	1677.48	92.92	96.75
Fosb	0.79	7.39291e-20	1.59638e-16	11.33	44.68	3.19	12.78
Gmfg	0.78	1.34202e-09	3.86382e-07	234.07	299.41	53.81	61.35
S100a10	0.76	2.42657e-13	1.49708e-10	897.04	1187.97	81.88	86.31
Adk	0.71	1.30542e-10	4.97433e-08	52.57	91.99	19.36	27.38
Dennd4a	0.71	1.8712e-09	5.27027e-07	43.1	75.91	16.1	24.43
S100a11	0.71	0.000267248	0.00319595	559.34	661.11	52.49	58.93
Zfp36	0.64	8.93041e-10	2.75482e-07	520.45	710.33	65.94	70.2
Tagln2	0.64	7.7884e-07	6.65324e-05	304.89	398.28	55.29	60.97
Selenop	0.64	1.68762e-07	2.13988e-05	146.21	188.47	37.79	44.25
Cpm	0.61	1.27381e-06	9.48472e-05	46.17	81.19	15.32	22.47
Fam129a	0.6	6.55408e-08	1.01089e-05	71.28	117.88	21.07	27.46
AI467606	0.59	3.73369e-08	6.44982e-06	157.77	206.01	45.1	50.83
Inpp4b	0.58	4.71806e-09	1.17552e-06	506.2	632.78	78.07	82.45
Cdc25b	0.57	3.67209e-05	0.000871349	70.51	103.16	19.83	26.32
H2-Ob	0.55	8.75584e-08	1.26045e-05	24.62	46.48	8.86	15.51
Cirbp	0.54	6.27548e-10	2.03263e-07	170.65	220.02	49.61	54.54
Crip1	0.53	1.14624e-05	0.000406172	994.53	1271.76	76.13	79.43
Fxyd5	0.53	3.8397e-14	2.61827e-11	900.48	1090.96	91.45	94.18
Fam46c	0.52	5.34161e-05	0.00110479	80.91	110.29	25.97	31.77
Hmgb2	0.51	3.41254e-05	0.000820276	240.59	293.46	50.47	55.3
Hist1h1c	0.51	1.67103e-07	2.13988e-05	89.93	132.56	28.54	33.74
Crtc3	0.51	5.43067e-08	9.02049e-06	93.08	122.64	31.88	37.14
Pde4b	0.51	6.70282e-06	0.000293384	97.54	129.37	29.94	35.25
Cd55	0.5	7.16249e-06	0.000304815	51.79	75.39	18.66	24.43
Atp5g1	-0.5	0.00073707	0.00642406	212.57	195.47	58.71	52.12
Rpl7l1	-0.5	1.09917e-06	8.63085e-05	51.84	38.84	21.7	14.9
Bak1	-0.5	6.61493e-06	0.000292502	46.99	34.26	19.75	13.09
Pcgf5	-0.5	2.81527e-07	3.17171e-05	43.73	30.11	17.26	10.59
Gpr83	-0.5	3.83863e-05	0.000896094	69.98	44.81	17.5	11.35
Ctsa	-0.5	0.00225507	0.0136081	109.04	87.76	35.54	29.27
Tgfb1	-0.5	0.00783818	0.0328752	221.07	193.95	53.5	47.35
Hnrnpm	-0.51	3.04879e-06	0.00017805	163.92	152.75	50.93	43.8
Chd2	-0.51	0.000224433	0.00286478	144.09	128.57	42.38	35.78
Mcts1	-0.51	9.72122e-07	7.77415e-05	68.83	57.62	28.15	21.1
Atxn2l	-0.51	0.000176804	0.0024578	141.89	125.61	45.65	38.88
Csnk2b	-0.51	0.0053762	0.0250915	185.05	157.34	52.64	46.29
Mrps33	-0.51	4.47796e-07	4.5075e-05	96.66	84.6	35.46	28.37
Arpc5	-0.51	0.000410212	0.00425581	309.85	294.76	68.66	62.25
Bach2	-0.51	0.00023761	0.00299462	91.66	71.44	28.3	21.86
Pip4k2a	-0.51	0.000183149	0.00250329	96.18	81.14	32.43	25.72
Mrps23	-0.51	6.97763e-06	0.000302348	62.17	49.03	25.97	19.14
Heg1	-0.51	2.70421e-07	3.07331e-05	50.34	38.14	20.68	13.77
Sat1	-0.51	5.98627e-05	0.00119688	169.44	160.49	50.54	43.65
Gm11707	-0.51	1.2049e-09	3.54789e-07	27.16	12.75	11.82	5.07
Gbp9	-0.52	0.000180931	0.00248765	75.14	57.99	26.28	19.67
Tespa1	-0.52	0.00249188	0.0145821	179.43	156.44	48.99	42.51
Snrpa1	-0.52	3.69299e-05	0.000874705	59.96	41.75	23.17	16.41
Cyb5a	-0.52	0.000953437	0.00760636	265.52	241.64	65.4	58.77
Ptp4a3	-0.52	0.000430706	0.00441474	117.72	99.71	37.48	30.79
Ctsw	-0.52	8.78609e-07	7.11454e-05	45.54	27.52	15.86	9.23
Safb2	-0.52	9.18792e-10	2.76834e-07	77.01	71.27	29.16	21.86
Swi5	-0.52	7.0972e-05	0.00134826	130.18	114.55	45.57	38.58
Rhog	-0.52	0.000442025	0.00449175	237.55	216.34	62.36	55.67
Mrps21	-0.52	0.000134707	0.00206757	140.13	123.88	45.8	38.88
Nfkb1	-0.52	0.000973406	0.007704	203.63	190.08	54.51	47.81
Ergic1	-0.52	2.05205e-05	0.000606994	53.31	37.04	21.46	14.67
Arih1	-0.52	3.05928e-05	0.00076932	94.24	79.97	34.21	27.23
Ecm1	-0.52	9.36209e-05	0.00159809	104	81.79	28.07	21.48
Stat3	-0.52	0.0018121	0.0116978	191.48	170.2	53.27	46.67
Tmem123	-0.52	0.000218367	0.00281228	127.45	108.1	40.82	33.96
Rassf5	-0.52	7.78872e-06	0.000319337	152.44	139.47	47.82	40.77
Atp5l	-0.52	0.00181729	0.0117138	390.09	351.54	77.6	71.56
H2-Q6	-0.52	7.74192e-05	0.00143292	333.08	316.78	67.34	60.51
Tuba4a	-0.52	1.4473e-05	0.000472536	73.3	59.67	27.22	20.2
Ifnar2	-0.52	5.70281e-05	0.00115446	111.41	93.06	36.16	29.2
Raly	-0.53	0.00126287	0.00915089	253.72	232.22	66.72	60.14
Ube2n	-0.53	0.0019998	0.0124976	122.91	102.35	41.68	34.95
Sipa1	-0.53	4.22531e-06	0.000217235	115.74	101.24	38.96	31.85
Dhx15	-0.53	0.000142476	0.002134	104.86	87.9	36.08	29.05
Mrpl52	-0.53	0.00131372	0.00938807	275.26	254.58	65.71	59.15
Ube3a	-0.53	8.50895e-05	0.00149989	97.77	81.89	33.51	26.48
Gbp2	-0.53	1.70867e-05	0.000540402	71.14	49	21.54	14.75
Sp100	-0.53	0.0012382	0.00905819	484.43	430.37	81.65	76.02
Kbtbd11	-0.53	0.000323351	0.00361461	205.37	189.78	51.48	44.7
Tap2	-0.53	0.00273883	0.0155791	243.38	222.43	63.53	57.11
Itgal	-0.53	0.00158403	0.0106445	180.19	157.69	48.21	41.45
Cd48	-0.53	0.000266659	0.00319595	247.17	227.14	61.28	54.46
Dtx3l	-0.53	3.04064e-05	0.000767345	73.46	55.81	26.67	19.59
Cox14	-0.53	0.000229475	0.00290908	122.36	102.31	40.51	33.43
Tra2b	-0.53	5.16979e-05	0.00108557	277.66	261.17	68.51	61.5
Ablim1	-0.53	0.00120201	0.00887872	390.11	350.81	74.57	68.31
Vps13b	-0.53	5.41893e-06	0.000257171	60.35	45.37	23.09	16.04
Purb	-0.53	0.00111188	0.00843905	160.19	136.82	47.59	40.7
Egln1	-0.53	4.53559e-05	0.00100107	79.26	62.1	29.39	22.24
Prpf40a	-0.54	0.000410273	0.00425581	125.99	107.73	40.51	33.51
Rwdd1	-0.54	0.000338671	0.00373114	117.16	99.75	40.59	33.59
Rgs19	-0.54	4.33175e-05	0.000965957	107.05	93.45	38.72	31.54
Rsrp1	-0.54	0.000234803	0.00297081	322.21	298.95	70.14	63.31
Igsf23	-0.54	1.80894e-11	7.81223e-09	30.07	14.78	11.82	4.77
Pomp	-0.54	0.00403867	0.0205035	199.33	167.4	55.44	49.02
Ndufb7	-0.54	2.38588e-05	0.000664762	176.3	164.37	53.42	46.22
Glg1	-0.54	1.84192e-05	0.000566839	97.79	85	34.37	27.08
Mgea5	-0.54	1.34379e-10	4.97433e-08	95.56	90.24	35.23	27.46
Crebbp	-0.54	6.84101e-06	0.000297423	124.22	112.31	40.67	33.43
Ptpn6	-0.54	0.00176362	0.0114822	145.68	118.19	40.75	33.96
Wdr1	-0.54	0.000163754	0.00232377	298.98	276.34	69.36	62.48
Mbp	-0.54	1.16578e-06	8.88458e-05	86.12	74.12	31.49	24.13
Acin1	-0.54	7.94113e-05	0.00145058	255.29	240.82	64	56.81
Sec61a1	-0.54	4.43624e-06	0.000224924	105.76	91.37	38.96	31.47
Usmg5	-0.55	0.00326294	0.0175559	221.46	191.67	59.95	53.63
Pak2	-0.55	0.0023814	0.0141032	311.7	278.48	70.92	64.67
Cd164	-0.55	0.0012967	0.00929719	129.89	108.97	43	36.08
Rcn1	-0.55	3.44225e-08	6.02673e-06	49.36	38.12	19.52	12.18
Psme3	-0.55	8.99766e-06	0.000350071	72.16	57.23	28.07	20.73
Celf2	-0.55	0.00341799	0.0180749	213.85	183.97	55.99	49.39
Jak3	-0.55	0.000585262	0.0054788	119.57	99.96	37.87	30.86
Cacybp	-0.56	5.65723e-06	0.000264603	83.5	69.14	30.64	23.22
Ndufb9	-0.56	3.02259e-06	0.00017805	143.77	131.72	48.6	41.07
Nxf1	-0.56	0.000143573	0.00214301	153.79	132.8	47.67	40.39
Luc7l	-0.56	1.43144e-06	0.000104283	68.25	53.85	25.97	18.53
Bzw1	-0.56	0.000101658	0.00167607	181.7	165.5	54.43	47.05
Casp8	-0.56	8.86238e-05	0.00154122	146.39	127.18	44.63	37.29
Ikzf4	-0.56	2.69112e-05	0.000717409	72.59	54.12	23.56	16.49
Sp140	-0.56	2.4905e-06	0.000156635	51.23	30.32	19.05	11.88
Pglyrp2	-0.56	9.23583e-05	0.00158699	101.17	80.52	34.29	27
Trac	-0.56	0.000632357	0.00574531	257.38	225.52	54.98	47.88
Ctsd	-0.56	7.84855e-05	0.00144031	158.21	139.13	47.98	40.54
Cycs	-0.56	1.30877e-06	9.68941e-05	52.29	35.71	20.53	13.16
Rasgrp1	-0.56	0.000157217	0.00226574	172.93	155.56	50.23	42.89
Fermt3	-0.57	0.000261097	0.00316443	224.23	197.83	58.01	50.83
Xpo6	-0.57	8.85892e-06	0.000348864	76.57	61.12	29.32	21.86
Sh2d2a	-0.57	0.000860695	0.00709228	153.3	129.42	43.78	36.69
Tial1	-0.57	1.56795e-05	0.000507859	90.21	70.24	32.19	24.58
Agpat3	-0.57	7.64859e-06	0.000314588	99.39	82.39	35.54	27.91
Chmp4b	-0.57	0.0013248	0.00944117	267.23	233.22	66.33	59.38
Ran	-0.57	0.00107066	0.00823797	248.73	217.47	63.14	56.13
Psmb8	-0.58	7.12258e-06	0.000304815	627.72	535.17	87.17	81.85
H2-M3	-0.58	2.74343e-08	5.0777e-06	72.22	58.77	27.45	19.52
Stk39	-0.58	1.1369e-07	1.56197e-05	48.18	29.24	18.12	10.59
Trim12a	-0.58	1.20334e-05	0.000420067	100.24	81.31	34.37	26.7
Stk17b	-0.58	0.00127409	0.00918972	408.72	356.93	73.95	67.62
H2-T23	-0.58	0.000106492	0.00173331	515.9	443.82	81.57	76.02
Ahcyl2	-0.58	5.07848e-05	0.00107394	79.82	56.1	26.67	19.36
Stambpl1	-0.58	5.6037e-07	5.26098e-05	86.19	72.73	31.73	23.9
Slc25a5	-0.58	0.00106494	0.00820297	308.43	270.08	69.44	62.93
Bcl2a1b	-0.59	0.000322674	0.00361461	139.25	100.76	30.48	23.45
Rasal3	-0.59	0.000646193	0.00584757	220.85	193.01	57.47	50.08
Ptpn7	-0.59	1.44093e-05	0.000472536	113.99	94.92	35.3	27.53
Rel	-0.59	1.02462e-05	0.000378205	89.41	69.14	27.37	19.74
Inpp5d	-0.59	8.92977e-06	0.000349529	97.95	81.28	32.89	25.11
Prdx5	-0.59	6.47041e-05	0.00126251	146.13	122.02	45.65	37.82
Hopx	-0.59	0.0014253	0.00986969	220.56	181.27	51.71	44.55
Prrc2c	-0.6	0.000683302	0.00611808	408.76	357.4	75.35	68.68
Atf7ip	-0.6	9.15503e-05	0.00157939	175.67	151.77	48.91	41.23
Midn	-0.6	3.09336e-08	5.56634e-06	63.67	48.37	24.65	16.64
Ubash3a	-0.6	3.78329e-06	0.000205089	88.39	70.13	31.73	23.75
Chd4	-0.6	0.000616723	0.00566283	203.75	169.82	52.49	45.01
Pag1	-0.6	3.20924e-06	0.000181567	64.93	44.01	24.03	16.26
Glmp	-0.6	1.03092e-06	8.14423e-05	110.78	97.59	40.12	32.07
Pdcd10	-0.61	1.34792e-05	0.000448937	142.64	123.78	48.13	40.09
Ctss	-0.61	0.000526208	0.00507258	173.91	141.06	49.22	41.6
Card11	-0.61	2.26214e-09	6.10589e-07	78.99	65.89	28.93	20.65
Tpm3	-0.61	0.000138947	0.00210304	426.19	385.15	78.93	71.86
Tnfrsf9	-0.61	1.62091e-05	0.000519815	128.06	88.51	21.93	14.75
Ugcg	-0.61	7.60112e-07	6.6094e-05	86.27	68.19	28.38	20.35
Nrip1	-0.61	0.000359494	0.00390084	169.97	138.5	44.4	36.91
Tnfrsf4	-0.61	7.36541e-07	6.44772e-05	340.55	361.57	50.86	42.66
Slc9a3r1	-0.62	0.00010013	0.00167017	266.53	243.56	66.1	58.32
Slfn5	-0.62	2.53705e-05	0.000688067	99.16	68.92	28.85	21.1
Trp53	-0.62	1.06003e-05	0.000387958	173.17	154.82	52.41	44.18
Slc25a11	-0.62	8.6091e-07	7.07265e-05	83.82	67.04	32.35	24.05
Fubp1	-0.63	3.63276e-07	3.88976e-05	157.44	139.38	47.28	38.8
Cct4	-0.63	8.09229e-05	0.00146145	164.21	142.3	51.32	43.19
Lgals1	-0.63	0.000619185	0.00567725	437.83	359.03	54.67	47.43
Cdc37	-0.63	0.000263025	0.00317863	225.12	195.01	60.89	53.1
Slc44a2	-0.63	9.4041e-05	0.00160105	169.94	145.77	50.86	42.81
Birc3	-0.63	1.32666e-05	0.000446263	106.22	85.07	34.6	26.48
Rap1gds1	-0.64	3.8254e-06	0.000205651	111.45	91.97	39.27	30.86
Ankrd17	-0.64	8.51392e-06	0.000341506	97.5	74.96	33.83	25.64
Pla2g16	-0.64	5.3364e-05	0.00110479	122.72	98.24	40.75	32.6
Atp6v1f	-0.64	6.83059e-05	0.00130527	232.33	201.9	62.44	54.31
Agfg1	-0.64	0.000267398	0.00319595	158.62	122.84	45.33	37.52
Spcs1	-0.64	0.000150971	0.00222019	167.38	139.13	51.79	43.72
Ogdh	-0.64	1.75317e-05	0.000549061	113.29	90.77	38.26	29.95
Pik3r1	-0.64	2.20979e-06	0.00014533	130.28	108.36	41.99	33.43
Trpc4ap	-0.65	5.86603e-05	0.00117647	137.76	110.31	42.46	34.34
Bzw2	-0.65	9.23469e-06	0.000351896	115.5	92.18	38.18	29.8
Iigp1	-0.65	2.71756e-13	1.60039e-10	43.58	12.91	12.05	4.08
Bclaf1	-0.65	1.28588e-05	0.000438196	184.52	159.57	52.33	43.95
Ifi35	-0.65	7.99149e-07	6.76717e-05	94.65	71.67	34.06	25.34
Cbl	-0.65	2.59312e-05	0.000697022	156.17	130.12	46.19	37.9
Mettl23	-0.66	6.53445e-05	0.00127309	178.37	151.48	54.67	46.37
Pdia3	-0.66	2.18193e-05	0.000635261	358.15	326.04	75.27	67.25
Rtp4	-0.66	2.15288e-10	7.3402e-08	52.66	27.83	16.72	8.32
Tcp1	-0.67	9.7904e-06	0.000364496	134.71	113.41	45.18	36.46
Dcun1d5	-0.67	4.76731e-08	8.12701e-06	117.72	102.58	42.61	33.59
Nsg2	-0.67	0.000153086	0.00222931	186.03	150.49	43.55	35.55
Pop5	-0.67	2.96646e-07	3.28491e-05	88.73	69.19	34.06	25.19
Fyn	-0.67	0.00025306	0.00310773	261.68	220.23	61.98	54.24
Atox1	-0.67	1.71013e-05	0.000540402	173.62	143.65	48.83	40.24
Irf9	-0.67	3.31329e-07	3.57725e-05	94.42	72.96	32.19	23.37
Satb1	-0.68	9.7807e-07	7.77415e-05	194.03	167.26	42.07	33.59
Tnik	-0.68	4.03191e-06	0.000212347	99.42	72.46	33.44	24.74
Gimap9	-0.68	1.83773e-05	0.000566839	183.14	154.23	51.17	42.51
Gdi1	-0.69	7.16377e-07	6.33764e-05	124.28	106.26	41.68	32.75
Minos1	-0.69	5.67454e-08	9.07646e-06	119.02	99.76	41.06	31.85
Samd9l	-0.69	1.26277e-06	9.45689e-05	86.6	59.98	29.63	20.8
Elk4	-0.69	8.62518e-07	7.07265e-05	101.1	81.3	35.38	26.4
Cltc	-0.69	1.58583e-06	0.000112891	115.78	92.97	39.42	30.33
Cox7b	-0.7	2.75993e-05	0.000728261	243.57	214.13	64.07	55.45
Acap1	-0.7	0.000105771	0.0017259	215.09	173.61	55.99	47.73
Pbrm1	-0.7	4.49462e-06	0.000225706	120.88	90.45	37.09	28.29
Gltp	-0.7	2.29081e-05	0.000649447	205.94	180.22	57.78	49.02
Parp14	-0.7	5.04668e-07	4.95339e-05	91.22	63.91	30.33	21.33
Dnajc3	-0.7	2.61222e-06	0.000162828	140.51	115.31	43.93	34.8
Ogfr	-0.71	9.19135e-08	1.30861e-05	83.55	61.19	30.17	20.95
Ramp1	-0.71	1.19335e-07	1.61053e-05	77.63	52.01	25.58	16.64
Uqcrb	-0.71	5.55407e-05	0.00113321	179.87	143.81	53.58	44.86
Il2rb	-0.71	0.000121554	0.00191589	411	337.86	67.34	59.61
Sesn3	-0.73	1.20673e-06	9.08973e-05	96.75	66.07	32.12	23
Polr1d	-0.73	2.85979e-05	0.000743518	266.48	227.29	67.26	58.55
Ifi206	-0.73	3.87277e-07	4.07932e-05	94.41	63.25	28.07	19.06
Gbp4	-0.73	5.22342e-07	5.05034e-05	110.64	75.63	31.57	22.39
Tgtp2	-0.73	1.68964e-08	3.47475e-06	73.51	40.8	22.86	13.84
Srp14	-0.73	4.77766e-07	4.76149e-05	158.84	135.11	50.54	41
Dnaja1	-0.73	2.00734e-05	0.000602017	291.76	258.46	67.96	59.3
Mob3a	-0.73	7.10273e-07	6.33764e-05	153.78	132	48.21	38.65
Dynll1	-0.74	4.31967e-05	0.000964925	239.22	196.5	59.25	50.61
Cd6	-0.74	1.61813e-05	0.000519815	227.88	188.69	57	47.96
Socs1	-0.74	8.09891e-06	0.000326883	163.2	112.96	34.6	25.95
Irgm1	-0.74	2.60278e-09	6.88196e-07	72.9	38.1	22.08	13.24
Atp5o.1	-0.74	2.10619e-08	4.07281e-06	198.66	178.83	60.5	50.61
Arpc5l	-0.74	2.10757e-10	7.3402e-08	121.95	106.81	43.62	33.51
Irf7	-0.75	5.67063e-08	9.07646e-06	88.66	57.79	26.28	17.02
Chchd10	-0.75	3.15184e-09	8.0069e-07	69.8	39.04	22.01	12.78
H2-Q4	-0.76	8.77515e-07	7.11454e-05	496.51	407.19	81.03	73.3
Ago2	-0.76	1.7012e-07	2.13988e-05	131.26	100.74	41.84	32
Sema4d	-0.76	5.9033e-06	0.000270329	173.44	140.92	51.48	41.91
Foxn3	-0.77	1.84932e-05	0.000567768	240.28	185.05	56.84	47.96
Hspa5	-0.77	2.19937e-05	0.000637156	286.97	230.55	61.12	52.27
Srsf6	-0.78	9.06254e-09	2.1348e-06	138.56	117.22	45.57	35.33
Mxd4	-0.78	2.14888e-06	0.000142774	142.69	96.59	38.49	29.27
Igfbp4	-0.78	2.07065e-08	4.06475e-06	148.71	84.1	20.84	12.33
Sdhaf1	-0.79	2.42806e-06	0.000154206	145.82	107.33	39.66	30.18
Tap1	-0.79	4.91698e-06	0.000240233	221.72	171.96	57	48.03
Il21r	-0.79	2.90738e-06	0.000176018	172.35	136.34	49.38	39.64
Rnf114	-0.79	1.23093e-08	2.74964e-06	139.75	115.42	45.8	35.48
Ly6c1	-0.79	7.37093e-06	0.000309054	267.14	196.25	31.96	23.52
Rbm38	-0.8	7.90533e-06	0.000322517	310.48	255.07	67.26	58.17
Isg15	-0.8	1.01727e-12	5.38891e-10	72.65	37.45	18.82	8.93
H2-T22	-0.8	5.53998e-08	9.07646e-06	327.36	254.97	71.15	62.93
Tnfaip8	-0.81	3.10092e-07	3.4047e-05	121.72	84.03	36.24	26.25
Psme2	-0.82	9.60736e-08	1.35297e-05	414.89	330.35	76.36	68
Ccnd2	-0.84	3.04503e-06	0.00017805	250.38	192.7	54.9	45.31
Slfn1	-0.88	4.24221e-07	4.39697e-05	192.94	146.84	48.76	38.35
Rgs10	-0.89	1.48743e-07	1.94658e-05	312.79	230.55	62.36	52.87
Ssh2	-0.89	2.89306e-09	7.49648e-07	155.26	124.12	45.26	33.96
Irf1	-0.89	4.36646e-07	4.45448e-05	231.32	158.63	49.14	38.8
Igf2r	-0.9	1.43626e-11	6.64577e-09	83.54	52.8	28.69	17.32
Rbms1	-0.91	1.5327e-08	3.3657e-06	164.13	127.68	49.77	38.28
Prkch	-0.91	6.37058e-08	9.94424e-06	397.65	315.96	73.25	63.46
Psmb10	-0.94	1.59504e-08	3.44422e-06	174.1	131.57	51.87	40.24
Vps37b	-0.95	1.57945e-11	7.05634e-09	126.79	93.92	38.8	26.63
Bst2	-0.96	9.56512e-11	3.75533e-08	122.91	90.03	37.71	25.57
Itgb2	-0.96	2.91719e-08	5.32326e-06	299.03	236.2	66.64	55.82
Sp110	-0.97	2.39089e-10	7.94265e-08	134.59	95.66	42.92	30.64
Igtp	-1	1.61476e-10	5.81135e-08	138.25	87.56	36.31	24.36
Zbp1	-1.05	2.15163e-14	1.54869e-11	94	53.08	30.33	17.25
Ccnd3	-1.05	8.08025e-10	2.55336e-07	236.26	180.64	58.48	45.84
Ddit4	-1.15	1.40438e-11	6.64577e-09	239.06	147.74	47.82	34.95
Psmb9	-1.33	2.97653e-15	2.26847e-12	251.76	172.86	62.13	46.82
Dtx1	-1.43	1.78621e-19	2.85112e-16	174.63	98.53	39.89	23.07
Ifi47	-1.51	1.98055e-19	2.85112e-16	253	150.86	55.75	38.65
Ly6a	-1.57	3.56028e-19	4.6127e-16	327.06	186.48	44.87	27.76
Stat1	-1.99	1.41014e-31	6.86112e-28	517	275.24	69.44	49.09

## Sheet: Tumor Placebo vs Treatment
Table S1. Differential gene expression analysis. Tumor Placebo vs Treatment.
	MAST - Likelihood ratio test			Mean expression (CPM)		Fraction of expressing cells (CPM>0)
Gene	Log2 fold change	P-value	Adjusted P-value	Placebo	PI3kdi	Placebo	PI3kdi
Lag3	2.31	5.93459e-16	7.42774e-12	129.95	466.54	32.47	54.49
Fos	1.84	7.13563e-07	0.000388302	354.78	703.6	36.36	54.49
Gzmb	1.77	4.06531e-06	0.00169605	839.36	1731.56	44.16	58.33
Zfp36	1.76	4.43064e-09	5.54538e-06	920.21	1510.82	68.05	81.41
Dusp1	1.76	1.84995e-10	3.859e-07	850.61	1477.06	74.29	87.5
Ccr5	1.74	3.29636e-11	1.37524e-07	88.09	221.55	29.09	47.44
Gimap7	1.72	1.12845e-10	3.53093e-07	348.04	567.42	62.86	78.53
Klrg1	1.63	4.4466e-07	0.000278268	150.32	329.87	23.9	40.71
Lilr4b	1.6	5.23044e-07	0.000297564	96.14	236.43	22.6	40.71
Metrnl	1.53	1.99915e-08	1.92472e-05	47.63	98.15	14.81	34.29
Dgat1	1.43	7.54588e-06	0.00286195	244.42	402.11	51.95	66.67
Vmp1	1.38	2.39649e-05	0.0076909	109.87	180.03	34.55	50.96
Tnfrsf9	1.3	1.52167e-08	1.5871e-05	927.38	1497.58	75.84	83.65
Irf7	1.29	0.000229806	0.039948	165.65	262.13	38.18	52.24
Areg	1.29	4.15286e-08	3.24858e-05	80.49	413.85	15.58	27.24
Fgl2	1.28	0.000201679	0.0368661	264.47	381.72	52.47	65.71
Dusp5	1.27	0.000136448	0.0322223	477.28	663.91	66.49	78.53
Icos	1.25	3.55931e-05	0.0106067	458.97	652.67	67.27	78.85
Ltb4r1	1.17	8.73489e-06	0.00321547	41.17	94.94	11.95	25.96
Zfp36l1	1.17	6.38916e-06	0.00249896	678.22	974.11	76.36	85.26
Gem	1.15	5.68652e-06	0.00229589	95.25	214.33	26.23	37.82
Crem	1.13	2.51971e-05	0.00788419	146.78	257.94	41.3	52.56
Ecm1	1.13	0.000193557	0.0367054	84.14	172.25	23.38	36.22
Ccr3	1	7.5999e-10	1.35886e-06	4.52	49.34	1.56	13.78
Pglyrp1	0.95	5.31978e-13	3.32912e-09	578.15	996.01	79.22	83.65
Ikzf3	0.81	1.38092e-05	0.00470128	165.52	272.97	47.53	54.49
Cd27	0.78	0.000169855	0.0349539	186.85	276.52	50.65	57.69
Cxcl2	0.73	1.12193e-05	0.00401202	8.18	299.34	2.34	8.97
Ly6a	0.65	2.57236e-09	3.5773e-06	1711.39	2540.39	89.35	90.38
Frmd5	0.6	3.91707e-05	0.0114014	4.77	32.62	1.82	9.62
Sdf4	0.59	8.60379e-05	0.0224344	952.54	1297.55	88.83	91.35
Cxcl3	0.56	5.89198e-05	0.0163876	3.28	112.55	1.04	7.05
Cyp11a1	0.54	2.27665e-06	0.000982572	0.79	40.54	0.26	6.41
Cd53	0.54	2.72081e-07	0.000189187	651.08	870.71	89.61	91.35
Sqstm1	-0.54	0.000136418	0.0322223	1233.43	858.47	87.79	85.9
Bhlhe40	-0.56	0.000161379	0.0348246	1119.36	813.58	75.58	73.72
Srsf5	-0.71	0.000160278	0.0348246	603.71	439.06	83.12	78.21
Hsp90aa1	-0.84	1.75819e-06	0.000833548	1328.87	871.96	82.6	78.85
Bbc3	-0.85	0.00021403	0.0377297	54.92	24.32	19.22	8.33
Rpf1	-0.86	0.000295717	0.0462649	53.06	24.83	22.34	11.22
Fyttd1	-0.87	0.000177335	0.0349539	60.81	25.62	24.94	14.1
Tiam1	-1	0.000205057	0.0368661	90.15	43.3	29.09	16.99
Pum1	-1.01	0.000178735	0.0349539	83.71	60.83	35.06	21.47
Il18r1	-1.02	0.000256031	0.0416167	97.25	55.88	29.35	16.35
Irf4	-1.05	1.96154e-06	0.000876809	58.29	21.63	20.52	7.05
Zbtb1	-1.06	0.000236751	0.0405915	105.94	54.09	35.58	22.76
Apbb1ip	-1.07	0.000129872	0.0318721	242.41	148.52	60.26	48.72
Irf2bpl	-1.07	0.00016427	0.0348474	114.83	55.18	33.51	20.83
Suz12	-1.09	0.000253331	0.0416167	102.6	66.11	37.92	24.04
Hbp1	-1.15	0.000206186	0.0368661	122.63	71.73	40.26	26.28
Gna13	-1.15	0.00011072	0.0277154	409.23	299.83	71.43	60.58
Tnip1	-1.16	0.000268824	0.0431359	165.27	97.08	47.27	33.97
Dusp4	-1.17	6.2912e-05	0.0171175	131.81	95.22	41.04	26.28
Slc9a3r1	-1.19	0.00028789	0.0456105	290.29	199	66.75	53.85
Prrc2c	-1.2	7.01678e-05	0.0186855	275.7	196.73	66.49	53.53
Per1	-1.2	0.000197369	0.0368661	137.48	85.92	40.52	25.64
Txnip	-1.2	2.7148e-05	0.00828743	383.45	250.05	68.05	56.09
Map2k3	-1.21	0.000178616	0.0349539	181.55	119.32	52.47	38.78
Tpp2	-1.24	0.000250751	0.0416167	183.25	136.97	55.84	40.38
Rbm38	-1.25	1.79816e-06	0.000833548	248.38	153.02	61.56	48.72
Cltc	-1.25	0.000176037	0.0349539	173.38	112.39	51.95	36.86
Skil	-1.27	1.3898e-05	0.00470128	175.26	91.92	44.94	30.77
Zfp622	-1.3	4.84988e-05	0.0137957	198.16	112.49	50.91	36.22
Dnaja1	-1.42	1.7475e-06	0.000833548	594.35	373.8	80	66.99
Ctla2a	-1.48	1.48148e-05	0.00487951	236.42	133.97	43.9	26.92
Zfp36l2	-1.5	1.72267e-06	0.000833548	755.86	602.26	84.94	68.59
Herpud1	-1.57	1.80054e-07	0.000132562	152.37	71.37	46.49	27.88
Rora	-1.6	1.52864e-10	3.8265e-07	402.78	217.3	67.01	52.24
Gm45716	-1.63	5.02632e-07	0.000297564	218.38	100.84	44.16	25.96
Smad7	-1.71	2.73832e-08	2.44805e-05	249.85	126.13	56.62	37.82
Tgif1	-1.84	3.52957e-08	2.94507e-05	229.16	115.24	49.87	28.21

## Sheet: Colon Placebo vs Treatment
Table S1. Differential gene expression analysis. Colon Placebo vs Treatment.
	MAST - Likelihood ratio test			Mean expression (CPM)		Fraction of expressing cells (CPM>0)
Gene	Log2 fold change	P-value	Adjusted P-value	Placebo	PI3kdi	Placebo	PI3kdi
Stat1	3.72	3.75531e-158	4.92209e-154	288.48	866.12	39.55	75.2
Ccl5	2.68	1.28471e-116	8.41937e-113	60.7	603.03	5.18	31.99
Gimap7	2.61	1.68073e-82	3.67156e-79	141.53	322.58	28.63	57.76
Gimap4	2.42	3.25207e-67	3.04463e-64	263.28	464.78	43.63	69.53
Ikzf2	2.35	1.97061e-68	2.1524e-65	435.58	726.16	56.37	79.5
AW112010	2.33	1.08822e-70	1.29666e-67	304.5	668.93	47.16	69.49
Gmfg	2.28	4.74645e-65	3.88823e-62	137.31	263.79	32.21	58.32
Ifi27l2a	2.27	1.1045e-66	9.65113e-64	388.74	772.82	53.5	75.04
Itgae	2.24	1.49914e-85	3.92985e-82	45.68	179.08	12.3	38.02
Tap1	2.07	1.57723e-58	8.61367e-56	101.03	209.16	25.21	49.44
Tpm4	2.02	4.09948e-49	1.62824e-46	217.95	355.49	43.96	66.36
Psmb9	2	1.32948e-61	8.29782e-59	75.51	167.08	19.42	43.37
Igtp	1.99	1.23826e-55	6.49193e-53	94.83	218.87	21.24	44.17
Ptprcap	1.94	1.9657e-53	9.2016e-51	186.25	353.1	41.48	61.98
Traf4	1.93	6.30627e-54	3.06134e-51	84.49	201.55	21.18	43.25
Satb1	1.91	4.0599e-45	1.33033e-42	206.19	338.15	33.09	54.86
Samhd1	1.87	3.14151e-41	8.07369e-39	228.15	390.73	42.42	62.94
Gimap3	1.87	1.98932e-45	6.86158e-43	422.71	609.03	60.56	80.1
Lrrc32	1.85	8.7773e-47	3.28698e-44	119.4	235.63	23.33	44.57
Myo1g	1.79	1.35809e-37	3.05573e-35	237.07	381.95	43.3	62.98
Ccr7	1.78	8.18972e-38	1.91683e-35	276.02	560.2	17.43	35.13
Psme1	1.76	9.62342e-42	2.52268e-39	242.4	378.63	52.56	71.58
Ly75	1.75	7.56127e-73	9.91055e-70	23.18	114.38	6.62	27.29
Gem	1.68	5.99003e-35	1.15458e-32	184.62	334.21	25.54	43.93
Pglyrp1	1.65	4.49099e-62	3.27019e-59	32.86	101.36	9.16	29.46
Tmem158	1.65	5.99114e-53	2.61753e-50	57.41	190.1	9.27	27.57
Selplg	1.59	2.76352e-33	4.96184e-31	275.16	425.69	52.23	68.89
Izumo1r	1.57	2.86545e-31	4.52499e-29	147.01	248.42	32.1	50.08
Ighm	1.56	3.29292e-40	8.14345e-38	76.79	155.68	18.31	36.94
Mxd1	1.53	1.32811e-27	1.64222e-25	308.95	431.01	49.75	66.6
Cnn2	1.53	7.76807e-30	1.18391e-27	240.04	364.95	48.04	64.55
H2-T22	1.52	3.74571e-29	5.16789e-27	197.1	284.02	43.46	61.09
Limd2	1.52	1.05141e-32	1.74441e-30	357.51	513.97	60.29	75.68
Pqlc1	1.51	1.37551e-37	3.05573e-35	103.47	171.76	22.12	40.35
Serpina3g	1.5	3.669e-60	2.18589e-57	32.5	105.61	6.51	24.6
Gimap6	1.47	1.55612e-28	2.03961e-26	542.29	670.76	63.1	78.82
Il1r2	1.45	2.09324e-53	9.46071e-51	27.6	134.01	5.85	22.27
Ass1	1.44	3.51672e-25	3.60107e-23	238.82	357.83	43.85	59.36
Eif5a	1.44	1.61358e-35	3.1566e-33	454.43	681.75	69.5	83.2
Ttc39c	1.42	1.27468e-31	2.03747e-29	117.72	180.57	26.64	43.85
Gimap5	1.42	3.56583e-29	4.97206e-27	157.22	229.53	33.26	50.32
Gimap1	1.41	7.60169e-29	1.02717e-26	216.84	282.45	43.74	60.65
Cd3d	1.38	3.47104e-33	5.98617e-31	351.39	501.76	63.93	77.53
Psmb8	1.38	3.53898e-24	3.22121e-22	186.52	264.2	42.58	58.64
Gbp3	1.37	1.00872e-29	1.51968e-27	121.26	183.98	27.41	44.09
Dgka	1.37	5.82837e-27	7.00848e-25	139.34	207.48	32.76	49.28
Clic1	1.35	4.47248e-23	3.78199e-21	238.47	330.92	50.63	65.51
Rbfa	1.32	1.19041e-29	1.75311e-27	69.92	143.24	18.42	34
Matk	1.31	9.00288e-40	2.1852e-37	35.09	92.67	10.65	26.73
Rgs10	1.31	5.7176e-21	3.72839e-19	213.83	299.22	43.35	58.2
Irf1	1.3	4.98954e-21	3.28633e-19	344.83	441.94	48.87	63.63
Faim	1.3	2.82942e-28	3.67181e-26	95.57	155.29	22.17	37.82
Rilpl2	1.29	6.90236e-27	8.22447e-25	87.2	151.61	21.24	36.66
Cd247	1.29	4.378e-22	3.279e-20	214.92	284.48	44.95	60.17
H2afy	1.29	1.03298e-21	7.35829e-20	191.01	259.98	44.95	60.13
Npc2	1.29	9.52993e-26	1.01552e-23	306.68	435.87	60.29	73.47
Arrdc1	1.29	1.12136e-31	1.81453e-29	67.21	118.11	18.59	34.53
Itpk1	1.28	5.80829e-30	8.95638e-28	64.2	120.96	17.93	33.56
H2-T23	1.25	5.48741e-20	3.07365e-18	273.31	371.9	53.83	67.48
Coq8a	1.25	2.05932e-22	1.59713e-20	111.92	183.09	26.42	40.96
Rgs2	1.25	2.53521e-19	1.32386e-17	701.38	917.44	63.82	75.2
Serp1	1.23	2.39841e-20	1.42945e-18	267.33	332.63	50.08	64.47
Mif	1.23	9.61781e-19	4.73391e-17	286.19	388.84	53.01	66.4
Coro1a	1.23	3.91213e-46	1.42434e-43	581.81	849.23	76.34	86.05
Ltb	1.22	2.77446e-19	1.43169e-17	382.33	476.14	52.68	66.52
Cyba	1.22	2.87697e-20	1.69858e-18	351.13	460.96	60.34	73.03
Tmem123	1.21	5.46015e-19	2.75254e-17	301.55	396.11	56.92	70.22
Tpi1	1.21	5.14968e-28	6.55309e-26	54.83	115.05	15.66	30.18
Nfatc3	1.21	3.85719e-23	3.28287e-21	145.58	198.48	35.08	50
Sdf4	1.21	6.82426e-29	9.31724e-27	427.11	599.62	68.84	80.06
Sh2d1a	1.2	8.88904e-24	7.92575e-22	102.97	169.92	22.12	36.54
Hist1h1e	1.2	4.16855e-27	5.05899e-25	60.73	136.42	14.62	28.5
Arpc1b	1.2	8.66267e-22	6.27302e-20	326.33	443.03	60.62	72.87
Csnk2b	1.19	1.78916e-22	1.39586e-20	146.19	190.51	37.12	51.77
Ndufa13	1.19	2.05308e-18	9.40901e-17	220.14	288.15	50.03	63.79
Mrps6	1.18	4.67009e-20	2.6384e-18	110.92	182.49	26.97	40.59
Prkca	1.18	1.11052e-21	7.82561e-20	155.61	208.64	33.81	48.15
Abracl	1.17	8.69627e-18	3.60702e-16	201.31	281.06	46.5	59.65
Lck	1.17	8.52069e-19	4.21436e-17	301.9	365.54	55.38	68.93
Mdh1	1.17	8.25267e-17	2.86917e-15	284.36	368.61	52.29	65.15
Isg15	1.16	2.87776e-26	3.19651e-24	68.2	131.34	15.94	29.98
Lag3	1.15	1.01299e-25	1.07075e-23	66.26	141.79	13.29	26.53
Tap2	1.15	7.98586e-22	5.88038e-20	76.13	125.34	23.22	37.26
Psme2	1.14	2.36093e-16	7.49268e-15	206.7	278.84	44.68	57.6
Prelid1	1.14	2.51673e-18	1.13747e-16	173.81	222.76	41.64	55.31
Atp5d	1.13	2.89279e-23	2.51098e-21	381.21	515.13	67.35	78.38
Hint1	1.13	2.17561e-16	6.95505e-15	241.57	307.54	52.29	65.11
Gramd3	1.12	8.85219e-25	8.65864e-23	129.45	179.29	24.82	38.63
Pkm	1.12	1.05066e-24	1.02008e-22	412.54	566.63	67.07	77.53
Apobec3	1.12	8.25602e-28	1.0405e-25	82.68	117.71	21.46	35.73
Arhgap45	1.12	8.39136e-17	2.90967e-15	220.97	284.47	46.55	59.69
Slc25a19	1.11	5.29231e-18	2.25949e-16	196.75	251.09	39.88	53.18
Wdr1	1.11	1.36228e-18	6.49287e-17	158.16	205.47	39.33	52.85
Capza1	1.11	3.71865e-20	2.16624e-18	147.8	189.87	37.62	51.41
Pmepa1	1.09	2.38083e-19	1.25324e-17	124.74	174.1	29.56	42.93
Hnrnpl	1.09	9.43995e-17	3.23899e-15	276.7	337.94	56.65	69.37
Mknk2	1.09	1.45221e-18	6.82727e-17	140.97	186.27	35.69	49.08
Reep5	1.09	3.05557e-17	1.13777e-15	156.29	201.49	38.06	51.29
Nsd3	1.08	1.94759e-16	6.28746e-15	261.59	325.46	52.68	65.47
Ier5l	1.08	2.76335e-20	1.63888e-18	202.07	256.17	29.4	42.36
Ctss	1.08	1.49948e-25	1.57229e-23	54.73	97.35	15.89	29.46
Eno1	1.08	2.18944e-16	6.97336e-15	156.26	210.15	37.12	50.08
Thap12	1.08	5.38885e-23	4.47036e-21	61.15	110.99	16.71	29.82
Fxyd5	1.08	4.41832e-34	8.27299e-32	646.63	879.31	80.31	89.03
Runx3	1.08	9.95335e-20	5.30319e-18	154.19	200.96	31.49	44.73
Socs3	1.07	2.59071e-16	8.16261e-15	234.85	323.23	31.55	43.89
Txndc17	1.07	6.72082e-21	4.2762e-19	86.23	125.84	25.43	38.87
Ndufa6	1.07	2.72152e-17	1.02503e-15	282.56	343.25	58.08	70.78
Cdv3	1.06	3.28851e-21	2.21038e-19	93.08	135.56	24.88	38.18
Cd27	1.06	6.17809e-17	2.20644e-15	173.86	228.23	35.41	48.15
Snx18	1.06	6.66925e-16	1.94686e-14	400.71	500.27	65.8	76.89
Tmpo	1.05	3.86169e-21	2.5693e-19	65.26	112.92	17.87	30.63
Ms4a4b	1.05	4.26258e-18	1.8401e-16	120.92	183.18	23	35.49
Trbc2	1.05	5.05337e-13	7.5957e-12	325.72	425.92	50.3	61.7
Fkbp1a	1.05	1.68339e-17	6.66592e-16	175.7	216.89	40.71	53.58
Gbp7	1.05	1.0289e-21	7.35829e-20	64.09	108.23	17.87	30.83
Irf9	1.05	1.1567e-29	1.72283e-27	38.45	75.86	11.42	24.68
Rhof	1.04	6.29191e-23	5.18667e-21	60.53	101.97	16.93	29.82
2010111I01Rik	1.04	2.15344e-17	8.32599e-16	178.57	223.11	36.79	49.44
Smad7	1.03	1.24217e-22	9.92753e-21	141.65	176.39	30.23	43.25
Peli1	1.03	4.53448e-15	1.12581e-13	449.39	528.07	65.14	76.49
Stk11	1.03	1.70032e-19	9.0227e-18	86.67	127.37	24.6	37.46
Cap1	1.03	8.14078e-15	1.90538e-13	172.88	222.27	41.86	54.18
Dctn4	1.03	9.13714e-16	2.59784e-14	130.32	176.24	34.97	47.55
S100a13	1.03	2.2465e-15	5.87722e-14	143.09	190.45	37.34	49.84
Tiam1	1.02	1.17127e-21	8.16588e-20	57.06	99.53	15.89	28.42
Lrp10	1.01	7.98644e-23	6.42198e-21	96.7	129.35	26.31	39.39
Fermt3	1.01	1.71864e-23	1.51182e-21	80.28	112.63	22.78	35.77
Arhgdib	1.01	3.59712e-16	1.09901e-14	403.37	528.39	65.2	75.12
Zgpat	1	4.90908e-18	2.10272e-16	114.07	151.02	31.55	44.21
Sec61b	1	1.67349e-13	2.87476e-12	239.28	291.94	52.95	64.63
Trib2	1	1.37192e-22	1.08981e-20	60.45	105.2	14.07	26.25
Hipk2	1	1.95907e-25	2.0379e-23	46.41	83.19	13.46	26.05
Sec61g	0.99	1.13042e-13	2.04647e-12	286.45	341.53	58.03	69.49
Gbp4	0.99	6.11763e-19	3.06854e-17	70.54	121.17	17.04	28.98
Mier1	0.99	5.89763e-18	2.48554e-16	204.39	238.57	40.93	53.22
Gpi1	0.99	6.27773e-14	1.21003e-12	348.67	423.81	64.48	75.12
Chd3	0.99	7.32645e-20	4.0179e-18	156.98	192.05	35.19	47.75
Tkt	0.99	2.68536e-19	1.39119e-17	107.78	140.85	29.56	42.12
Uqcrh	0.98	3.76682e-18	1.64026e-16	509.69	622.39	75.79	85.53
Mcm6	0.98	3.80554e-22	2.89996e-20	49.38	90.84	13.24	25.32
Tmbim4	0.98	1.58124e-23	1.40036e-21	77.44	106.67	21.79	34.49
Psmb1	0.98	3.82906e-14	7.80521e-13	244.07	291.98	54.72	66.4
Stat3	0.98	2.73139e-14	5.72806e-13	690.58	824.7	73.14	82.64
Il2rb	0.98	6.24828e-13	9.19049e-12	417.8	495.07	63.87	74.48
Capzb	0.98	4.70151e-13	7.09939e-12	278.78	353.68	57.58	68.29
Gdi2	0.98	6.17499e-13	9.10412e-12	231.85	284.02	50.08	61.58
Rheb	0.97	4.64744e-20	2.63697e-18	135.95	168.02	34.36	46.78
Vasp	0.97	1.78888e-13	3.04505e-12	166.06	210.62	40.21	51.85
Fis1	0.97	1.36828e-16	4.57502e-15	180.13	214.81	43.41	55.55
Pla2g16	0.97	7.65068e-17	2.66695e-15	81.59	121.33	23.77	35.81
2010107E04Rik	0.96	5.61571e-18	2.38204e-16	176.12	205.79	42.08	54.3
Riok1	0.96	1.90766e-14	4.11923e-13	135.52	180.04	32.38	44.09
Slc25a3	0.96	3.53275e-26	3.89107e-24	716.64	935.06	82.4	90.23
Fam46c	0.96	9.80077e-20	5.2647e-18	103.23	133.03	24.88	36.98
Mif4gd	0.96	1.29645e-12	1.7357e-11	332.26	396.62	59.35	70.18
Psmb10	0.96	1.76038e-27	2.15638e-25	35	65.42	11.14	23.51
Ms4a6b	0.96	1.08012e-18	5.24337e-17	126.43	164.92	27.08	39.11
Zfp281	0.95	4.49525e-21	2.97572e-19	55.65	95.85	15.06	26.93
Ube2j1	0.95	5.77431e-16	1.70076e-14	197.38	235.85	45.17	57.07
Ptpn22	0.95	1.06033e-17	4.31609e-16	176.15	213.84	37.56	49.52
Chp1	0.95	2.08888e-15	5.48677e-14	113.65	150.93	31.83	43.65
Tapbp	0.94	3.21394e-15	8.21151e-14	107.72	145.82	29.62	41.4
Gng5	0.94	6.36191e-14	1.22446e-12	406.29	474.03	69.61	79.98
Gbp2	0.94	2.02449e-26	2.32763e-24	39.61	86.15	8.11	19.65
Ccni	0.94	1.29573e-15	3.51618e-14	167.73	205.38	41.53	53.3
Gzmb	0.94	7.34397e-16	2.13431e-14	609.59	681.81	21.57	31.83
Traf3	0.94	6.64292e-17	2.35835e-15	82.44	121.91	22.89	34.57
Cd3g	0.94	1.70022e-15	4.51109e-14	487.12	599.86	72.59	81.67
Gm26917	0.93	1.91481e-11	1.89542e-10	169.38	286.38	33.59	44.13
Ppib	0.92	9.47658e-12	1.01313e-10	288.38	349.48	59.68	70.02
Sri	0.92	1.05977e-11	1.11301e-10	283.88	335.19	56.76	67.32
Atp5g3	0.92	3.18635e-13	5.03234e-12	370.98	449.93	67.35	76.93
Rnf157	0.92	3.04773e-23	2.62807e-21	119.56	147.29	26.14	38.02
Lsp1	0.91	9.3105e-11	7.93967e-10	273.47	343.95	54.27	64.43
Ctsa	0.91	2.3535e-21	1.60663e-19	54.31	83.38	16.05	27.73
Pycard	0.91	1.3774e-24	1.30823e-22	36.59	65.45	11.47	23.19
Casp3	0.91	3.42665e-29	4.82936e-27	29.48	59.39	8.88	20.62
Myl6	0.91	4.19701e-19	2.12395e-17	534.32	683.81	76.12	84.24
Stat5a	0.91	6.09365e-13	8.9943e-12	133.93	181.1	30.72	41.68
Uqcrq	0.9	6.28242e-18	2.63922e-16	146.63	174.68	37.95	49.6
Rab8a	0.9	1.74611e-17	6.85218e-16	95.21	127.96	26.48	38.02
Tspan13	0.9	3.51188e-10	2.59911e-09	344.31	419.79	55.98	65.88
Ypel3	0.9	1.30183e-11	1.33201e-10	242.84	291.82	50.19	60.85
Lin54	0.9	1.39215e-16	4.61946e-15	70.48	110.23	19.31	30.39
Gpr146	0.9	9.97872e-27	1.1783e-24	48.11	75.33	12.47	24.04
Pgk1	0.9	1.87269e-12	2.39233e-11	114.77	157.12	30.56	41.36
Capg	0.9	2.51803e-15	6.53542e-14	354.46	478.05	59.74	68.21
Gbp5	0.89	4.49967e-20	2.57542e-18	55.16	91.83	13.29	24.36
Jak3	0.89	4.61347e-17	1.6938e-15	73.58	104.39	22.01	33.4
Rab27a	0.89	8.92397e-28	1.11397e-25	25.21	55.2	7.67	18.97
Sdcbp2	0.89	3.75773e-20	2.17932e-18	82.81	111.23	21.4	32.8
Anp32a	0.88	3.18672e-13	5.03234e-12	341.01	383.66	58.69	69.29
Birc2	0.88	2.81531e-16	8.78578e-15	115.02	146.06	28.68	39.95
Crlf2	0.88	2.40781e-12	2.99542e-11	132.89	168.05	34.47	45.3
Cd74	0.87	1.10347e-13	2.0064e-12	471.61	441.06	35.52	45.98
H2-Q7	0.87	5.86803e-15	1.41904e-13	748.04	882.63	80.92	89.27
Gm16286	0.87	1.01559e-14	2.3231e-13	174.26	205.08	41.97	52.97
Tmem234	0.86	6.31671e-13	9.27135e-12	164.47	196.86	40.87	51.69
Eef1g	0.86	1.87114e-13	3.1686e-12	215.3	248.35	48.7	59.49
Trat1	0.86	9.64766e-20	5.20378e-18	50.54	87.33	11.47	21.99
Lilr4b	0.86	4.91086e-09	2.89159e-08	377.09	449.61	45.5	54.98
Arpc4	0.86	2.0998e-11	2.0585e-10	255.55	294.66	55.32	65.59
Arf5	0.86	1.21488e-10	1.00336e-09	273.47	319.32	58.25	68.29
Ppp1ca	0.86	1.4255e-09	9.23121e-09	214.55	267.01	47.99	57.76
Sema4b	0.85	4.03219e-19	2.05641e-17	44.67	75.98	12.85	23.55
Sbno2	0.85	9.41027e-17	3.23728e-15	90.08	120.97	22.61	33.32
Emp3	0.85	1.16313e-12	1.57981e-11	209.02	243.87	43.08	53.58
Ifi47	0.84	2.39932e-20	1.42945e-18	34.84	77.38	9.16	19.45
Ccr5	0.84	3.42836e-17	1.26579e-15	63.26	105.7	13.4	23.63
Cox17	0.84	1.47905e-13	2.58479e-12	144.7	174.36	36.46	47.11
Rab6b	0.84	2.29485e-21	1.5748e-19	34.65	64.63	10.65	21.34
Prdx1	0.84	4.35851e-11	4.00329e-10	175.28	212.28	41.42	51.73
Atp11b	0.84	2.20222e-13	3.65373e-12	90.49	128.5	23.33	33.68
Gm9844	0.84	5.02838e-15	1.22732e-13	121.63	147.99	31.88	42.56
Sla	0.84	1.24919e-09	8.17432e-09	433.93	503.9	64.98	74.04
H1f0	0.84	4.99988e-13	7.52392e-12	111.75	163.38	21.24	31.23
Prdx2	0.84	3.90139e-15	9.8527e-14	91.37	119.24	25.81	36.54
Cisd2	0.84	1.06483e-17	4.32096e-16	133.44	158.92	33.7	44.53
Uqcrfs1	0.84	1.09293e-16	3.70155e-15	156.37	181.97	39.88	50.68
Gm19585	0.83	4.52777e-20	2.58024e-18	43.61	75.53	11.09	21.46
Vcpkmt	0.83	6.13379e-19	3.06854e-17	73.66	100.29	18.86	29.54
Zdhhc20	0.83	1.42524e-18	6.7439e-17	77.59	104.45	21.79	32.56
Neb	0.83	8.70873e-15	2.02385e-13	92.58	129.14	21.46	31.79
Mrpl52	0.83	2.00053e-14	4.29148e-13	160.79	186.61	39.33	49.88
Coro1b	0.83	7.10232e-14	1.35502e-12	91.27	121.42	26.48	36.98
Crlf3	0.82	1.05635e-10	8.85266e-10	232.95	269.74	46.66	56.63
Pabpn1	0.82	1.02465e-11	1.08046e-10	160.09	191.63	41.26	51.53
Atp5c1	0.82	6.95551e-10	4.83126e-09	220.04	261.68	51.74	61.54
Ifi27	0.82	3.55564e-12	4.22136e-11	146.73	179.72	37.23	47.51
Syngr2	0.82	1.99037e-11	1.95561e-10	143.73	177.57	33.92	43.97
Ctdnep1	0.82	7.50749e-19	3.7273e-17	63.7	87.93	19.14	29.78
Chmp4b	0.81	1.33226e-11	1.35996e-10	286.11	322.05	59.07	68.97
Sh3bgrl	0.81	1.46472e-14	3.232e-13	74.18	102.05	21.46	31.79
Sdcbp	0.81	1.18514e-14	2.66901e-13	188.43	213.2	43.13	53.62
Got1	0.81	9.1608e-10	6.17965e-09	810.91	866.3	69.17	77.81
Tmbim6	0.81	2.41626e-10	1.85638e-09	360.23	405.31	65.75	75.04
Idh3b	0.81	1.64332e-17	6.54681e-16	108.42	131.34	30.83	41.52
Rexo2	0.81	2.58064e-15	6.68467e-14	59.44	90.32	17.82	28.05
Arl6ip1	0.81	1.58488e-09	1.01629e-08	318.64	373.88	61.56	70.78
Ctsw	0.81	6.25113e-26	6.71587e-24	19.36	53.61	5.3	15.19
Rras2	0.81	3.10093e-23	2.65646e-21	24.47	53.35	7.5	17.73
Fmnl1	0.81	8.37138e-14	1.56694e-12	138.29	167.27	34.53	44.82
March7	0.8	1.01997e-10	8.60833e-10	155.55	190.53	38.67	48.55
Ikzf4	0.8	1.72998e-18	8.01231e-17	47.68	75.43	12.8	22.99
Ptpn1	0.8	6.78683e-15	1.6168e-13	116.98	142.96	30.17	40.51
Ankrd11	0.8	6.11728e-17	2.19069e-15	299.63	315.59	56.32	66.72
Ap3b1	0.8	2.48277e-13	4.03874e-12	94.45	126.22	24.6	34.69
Sh3glb1	0.8	3.85244e-11	3.58113e-10	209.34	242.56	48.92	58.92
Gpr171	0.8	3.47848e-20	2.0445e-18	38.86	67.79	10.81	21.02
Smchd1	0.8	2.74153e-12	3.33332e-11	98.88	136.37	25.21	35.17
Cdc42se2	0.8	1.97206e-11	1.94052e-10	199.74	231.08	45.28	55.23
D8Ertd738e	0.8	1.35581e-13	2.39496e-12	312.72	338.95	58.63	68.69
Pik3cd	0.8	4.23841e-20	2.44726e-18	44.33	69.81	12.19	22.43
Edf1	0.8	3.14897e-09	1.91525e-08	191.93	230.05	47.16	56.71
Vamp3	0.8	6.06981e-21	3.91906e-19	54.49	76.9	16.16	26.57
Rnf114	0.8	2.7655e-15	7.13531e-14	87.21	113.44	24.71	35.01
Pkp3	0.79	1.29777e-12	1.7357e-11	79.33	112.84	22.12	32.03
Retreg1	0.79	1.91754e-13	3.23882e-12	151.74	179.96	37.01	47.11
Vps29	0.79	1.06829e-18	5.20825e-17	79.96	100.11	23.06	33.48
Glrx	0.79	8.0184e-09	4.46741e-08	246.12	288.21	40.6	49.84
Slamf6	0.79	6.04086e-20	3.35498e-18	36.26	64.58	10.31	20.34
Psen2	0.79	1.33576e-13	2.36592e-12	160.3	184.54	37.01	47.03
Psma5	0.79	1.31446e-18	6.31084e-17	78.45	98.75	23.06	33.44
Shisa5	0.79	4.54167e-33	7.73086e-31	1074.1	1358.42	90.62	95.7
Ccdc6	0.78	6.34908e-21	4.05939e-19	29.4	56.56	9.32	19.37
Lsm8	0.78	3.67789e-13	5.69812e-12	179.33	203.48	41.42	51.41
Adap1	0.78	1.16474e-24	1.12252e-22	19.38	44.11	6.56	16.64
Ppdpf	0.78	1.88375e-17	7.37026e-16	69.19	90.86	20.02	30.18
Gabarapl2	0.78	1.45328e-18	6.82727e-17	175.43	192.71	42.8	53.09
Selenow	0.78	5.99591e-11	5.36319e-10	444.8	488.52	70.88	79.78
Epsti1	0.78	7.78408e-18	3.24353e-16	57.06	81.84	16.05	26
Bloc1s1	0.78	7.74549e-20	4.21246e-18	88.36	106.95	23.66	33.92
Dusp5	0.78	3.28434e-08	1.62658e-07	438.3	503.48	62.55	71.06
Gyg	0.77	1.99638e-24	1.85578e-22	28.41	50.02	8.77	18.93
Grk6	0.77	5.78871e-13	8.58287e-12	114.77	142.13	29.4	39.23
Ecm1	0.77	2.97868e-18	1.32795e-16	36.95	78.13	9.05	18.49
Litaf	0.77	1.42106e-13	2.4966e-12	82.76	122.07	14.12	23.19
Ndufs4	0.77	4.62786e-23	3.86353e-21	81.06	98.8	23.55	33.88
Nab1	0.77	1.9037e-13	3.21958e-12	208.62	232.66	43.79	53.66
Ywhah	0.77	3.4907e-16	1.07401e-14	108.12	127.87	28.19	38.26
Slc9a3r1	0.77	4.74036e-10	3.41009e-09	190.99	227.62	40.54	49.96
Eif3m	0.77	6.66377e-13	9.70467e-12	206.98	231.14	48.92	58.72
Ndufa3	0.76	1.35363e-13	2.39433e-12	102.02	125.55	28.3	38.18
Ciapin1	0.76	3.12289e-15	8.01012e-14	47.33	77.35	13.9	23.47
Krit1	0.76	7.37956e-14	1.39774e-12	69.38	97.61	19.75	29.46
Grina	0.76	7.10057e-12	7.85377e-11	91.52	118.83	25.92	35.57
Tab2	0.76	1.08758e-15	3.03943e-14	111.16	132.52	28.41	38.38
Ninj1	0.76	6.79679e-15	1.6168e-13	102.6	123.54	26.53	36.37
Ssr4	0.76	5.18156e-13	7.76168e-12	192.55	215.65	45.5	55.27
Tpr	0.76	1.689e-09	1.07779e-08	317.2	358.47	57.14	66.28
Cdipt	0.76	1.48358e-18	6.94475e-17	58	78.15	17.37	27.37
Brk1	0.76	1.54314e-14	3.39362e-13	116.41	138.51	32.65	42.6
Clta	0.76	3.25199e-09	1.96786e-08	278.16	312.38	58.03	67.12
Itpr1	0.76	5.33626e-16	1.586e-14	73.78	99.08	20.35	30.14
Prkch	0.75	1.16952e-12	1.58521e-11	346.83	379.1	59.4	68.85
Flnb	0.75	2.32199e-11	2.25774e-10	90.43	125.99	21.18	30.35
Slc16a3	0.75	2.22005e-22	1.71166e-20	19.88	52.54	5.57	14.83
Dok1	0.75	7.5585e-23	6.11539e-21	23.15	45.28	7.83	17.64
Sbno1	0.74	2.81887e-10	2.14433e-09	114.64	149.15	28.96	38.18
Cbarp	0.74	9.90327e-17	3.37148e-15	64.8	89.51	15.89	25.36
Arpc5	0.74	4.99964e-09	2.93594e-08	232.54	267.46	50.63	59.65
Cnppd1	0.74	1.65033e-13	2.83869e-12	104.09	126.01	28.57	38.26
Cish	0.74	5.88744e-08	2.78607e-07	345.57	391.81	56.98	65.51
Pdcd10	0.74	7.92331e-13	1.12759e-11	138.14	162.11	37.4	47.03
Cd2	0.74	6.65273e-12	7.42737e-11	759.05	842.77	82.79	90.11
Sec11c	0.74	7.30415e-13	1.04515e-11	145.01	168.35	36.46	46.06
Crybg1	0.74	1.59928e-13	2.75812e-12	70.07	97.94	19.58	28.98
Mrpl54	0.74	1.54706e-13	2.6893e-12	121.58	142.09	32.49	42.12
Klf13	0.74	8.63299e-12	9.33602e-11	206.17	231.4	44.07	53.5
Dusp14	0.73	2.59577e-21	1.76284e-19	39.29	72.47	7.28	16.28
Ripor2	0.73	3.0213e-12	3.64979e-11	59.17	91.69	16.49	25.6
Rhog	0.73	1.37742e-08	7.34196e-08	478.43	545.23	72.2	79.9
Gpx4	0.73	3.37137e-10	2.51071e-09	814.47	858.93	76.12	84.08
Set	0.73	1.91144e-12	2.43471e-11	176.83	199.56	42.47	51.89
Sp100	0.73	5.01533e-15	1.22642e-13	87.07	111.49	22.84	32.4
Cenpa	0.73	2.63596e-11	2.52003e-10	180.99	209.66	34.03	43.21
AU020206	0.73	3.71279e-11	3.45376e-10	126.08	158.93	30.5	39.79
Srp14	0.73	1.37848e-12	1.83615e-11	155.09	175.39	39.88	49.4
Cdk6	0.73	1.25473e-15	3.41909e-14	50.59	74.42	14.73	24.16
Cox5a	0.73	1.43804e-08	7.63789e-08	178.92	210.89	44.4	53.34
Cd53	0.73	8.37779e-09	4.645e-08	503.93	567.46	72.7	80.67
Rhoa	0.73	5.45581e-11	4.91473e-10	510.25	549.94	76.67	84.89
Ccs	0.73	4.1625e-19	2.11465e-17	32.36	55.44	10.37	19.82
Ube2j2	0.72	1.21728e-12	1.64145e-11	104.47	128.43	29.62	38.95
Mettl23	0.72	3.59329e-14	7.3936e-13	113.91	134.74	30.72	40.19
Elovl6	0.72	2.03073e-23	1.77445e-21	20.34	45.73	5.35	14.43
Bcl3	0.72	1.60717e-13	2.76809e-12	203.02	220.86	40.65	50
Acsbg1	0.72	3.33367e-21	2.22931e-19	24.91	49.49	7.39	16.56
Maz	0.72	3.90982e-15	9.85499e-14	57.43	80.44	17.65	27.05
Pja1	0.72	2.70584e-12	3.30526e-11	89.71	120.58	19.91	28.9
Cd274	0.72	1.50827e-09	9.73579e-09	99.68	135.35	25.26	34.08
Raf1	0.72	9.98573e-13	1.37772e-11	92.61	119.08	25.15	34.41
Tma7	0.72	3.0444e-08	1.51434e-07	252.95	288.44	56.21	64.83
Lypla2	0.72	4.26805e-12	4.96815e-11	100.24	122.9	29.34	38.67
Higd1a	0.72	3.01423e-17	1.12557e-15	61.32	81.51	17.54	26.97
Scand1	0.72	1.29008e-10	1.06146e-09	249.89	275.01	51.46	60.49
Apaf1	0.72	4.42625e-18	1.90213e-16	36.29	59.01	10.7	19.94
Ehd1	0.71	2.03749e-13	3.41501e-12	90.27	113.21	22.78	31.91
Eif3k	0.71	1.80339e-08	9.40217e-08	284.76	316.9	59.85	68.45
Pcbp1	0.71	1.66011e-08	8.74209e-08	298.42	338.87	60.34	68.93
Snrpe	0.71	7.38645e-10	5.09549e-09	292.25	321.48	61.67	70.42
Ube2b	0.71	2.51787e-08	1.27156e-07	420.8	482.94	71.59	79.1
Txk	0.71	7.9919e-14	1.50503e-12	61.61	86.04	16.38	25.44
Vps26b	0.71	1.2131e-13	2.18408e-12	49.78	75.4	14.56	23.59
Ntan1	0.71	5.15996e-21	3.38158e-19	75.26	90.15	21.84	31.47
Eif4e2	0.71	8.05824e-11	6.96238e-10	103.89	128.64	31	40.07
Areg	0.71	3.953e-05	0.00011239	1232.26	1511.83	56.7	62.86
Hip1r	0.71	3.84333e-14	7.81e-13	52.14	77.97	15.11	24.16
Akr1a1	0.71	6.83639e-12	7.6065e-11	135.66	157.61	36.68	45.82
Csrp1	0.71	1.25908e-15	3.42382e-14	110.99	129.6	27.36	36.66
Gstp3	0.71	5.91667e-17	2.13049e-15	44.08	66.04	12.69	21.82
Etv3	0.71	8.74856e-15	2.02951e-13	53.89	78.5	14.62	23.63
BC031181	0.7	2.82289e-16	8.78851e-15	134.33	149.52	34.31	43.81
Tmem243	0.7	1.10325e-14	2.51046e-13	85.76	105.63	22.5	31.67
Parp14	0.7	4.12332e-16	1.25103e-14	37.01	62.03	10.92	19.9
H13	0.7	6.56935e-12	7.34679e-11	141	164.09	37.23	46.38
Cox5b	0.7	3.63819e-08	1.78866e-07	309.69	344.13	62.16	70.46
Cox4i1	0.7	2.75437e-10	2.09779e-09	592.46	672.88	80.58	87.46
Rap1a	0.7	9.68293e-17	3.31368e-15	149.21	161.88	36.18	45.58
Ccm2	0.7	4.41072e-11	4.04558e-10	125.86	149.91	32.1	41.12
Khdrbs1	0.7	4.78878e-07	1.89799e-06	386.89	438.34	64.2	71.99
1810037I17Rik	0.7	1.28598e-10	1.06009e-09	194.78	216.19	46.22	55.14
Csnk1g3	0.7	8.10576e-13	1.14981e-11	87.18	110.4	24.49	33.52
Rtraf	0.7	7.69994e-11	6.68808e-10	192.1	212.07	45.84	54.7
Neat1	0.7	2.75448e-10	2.09779e-09	83.67	114.01	20.41	28.98
Lef1	0.7	1.92491e-13	3.24708e-12	47.88	78.98	12.13	20.74
Ube2d2a	0.7	3.45e-07	1.41177e-06	193.16	230.23	48.37	56.67
Laptm4a	0.69	2.67973e-19	1.39119e-17	121.13	135.58	32.05	41.56
Snx5	0.69	1.97048e-10	1.54008e-09	114.89	138.37	31.11	39.95
Cd37	0.69	2.6568e-09	1.63949e-08	324.11	353.82	62.55	70.98
Srf	0.69	3.92579e-17	1.44538e-15	26.18	50.31	8.11	16.84
Morf4l1	0.69	1.83184e-12	2.3493e-11	388.53	405.11	67.18	75.92
Cbx3	0.69	1.08623e-17	4.39419e-16	58.34	75.21	16.88	25.96
Gnas	0.69	1.23617e-09	8.10934e-09	613.98	686.77	76.67	82.96
Scyl2	0.69	1.46544e-16	4.83818e-15	55.31	75.95	16.05	25.04
Zc3h15	0.69	4.22678e-12	4.92887e-11	177.39	199.6	42.75	51.77
Arf4	0.69	6.76864e-08	3.16393e-07	462.52	540.86	72.75	79.74
Akna	0.69	9.44502e-11	8.03869e-10	161.76	185.94	35.96	44.77
Runx2	0.69	5.84031e-13	8.6496e-12	87.56	110.41	22.45	31.31
Plekha2	0.69	2.29174e-17	8.80874e-16	45.99	65.13	13.4	22.43
Glmp	0.68	5.38654e-12	6.17685e-11	64.93	87.03	20.63	29.5
Impa2	0.68	2.90205e-17	1.08989e-15	37.32	59.54	10.7	19.53
Itgb7	0.68	2.24128e-06	7.8668e-06	234.13	279.33	49.75	57.6
Eva1b	0.68	2.50348e-13	4.05961e-12	51.75	71.94	15.22	23.91
Itgb8	0.68	7.49867e-19	3.7273e-17	38.96	60.5	9.21	17.93
Gstp1	0.68	1.95537e-12	2.48585e-11	154.93	169.55	37.62	46.54
Uqcr10	0.68	4.51991e-13	6.86471e-12	149.35	168.02	37.56	46.5
Grk2	0.68	3.06446e-13	4.8686e-12	87.32	107.29	25.32	34.24
Elovl5	0.68	4.25733e-09	2.52835e-08	300.66	330.71	52.56	60.97
Agpat3	0.68	1.33236e-18	6.37343e-17	44.54	63.56	13.62	22.63
Donson	0.68	3.8309e-12	4.49925e-11	117.82	137.99	30.72	39.51
Dtx3l	0.68	2.44965e-19	1.2843e-17	17.52	42.78	5.79	14.35
Kxd1	0.68	1.23589e-16	4.16421e-15	79.89	97.14	23.17	32.32
Snrpd2	0.68	4.08229e-13	6.24347e-12	113.55	132.01	31.83	40.84
Tmem173	0.68	2.14927e-15	5.6341e-14	35.28	57.52	11.09	19.82
Metrnl	0.68	1.46098e-16	4.83562e-15	39.58	63.02	10.59	19.21
Mcrip1	0.67	3.85661e-16	1.17555e-14	51.79	71.29	15.77	24.72
Cd83	0.67	3.34614e-06	1.14094e-05	883.39	889.68	50.52	57.8
Map2k2	0.67	1.72999e-14	3.77916e-13	106.37	124.15	29.56	38.5
Rpl36al	0.67	4.32532e-10	3.13388e-09	564.11	657.8	80.03	86.37
Cxcr4	0.67	2.11995e-14	4.51073e-13	110.29	130.46	22.95	31.67
Tes	0.67	1.75121e-08	9.16656e-08	169.29	199.62	41.26	49.68
Vdac2	0.67	2.7127e-12	3.31056e-11	146.56	164.58	38.61	47.39
Arhgap31	0.67	1.79001e-07	7.75335e-07	342.75	388.39	58.69	66.64
Mndal	0.67	8.8328e-13	1.2382e-11	75.22	96.97	20.52	29.22
Map3k1	0.67	2.16807e-09	1.35765e-08	140.75	171.18	33.7	42.16
Atp5e	0.67	6.65207e-09	3.78095e-08	511.84	589.61	76.61	83.12
Eif3c	0.67	1.57418e-10	1.26893e-09	187.73	209.54	44.9	53.5
Cd3e	0.67	7.00682e-12	7.77632e-11	621.49	733.08	81.8	87.62
Commd4	0.66	2.19198e-16	6.97336e-15	73.84	90.92	21.51	30.43
Zdhhc18	0.66	6.40499e-09	3.65796e-08	314.79	342.65	59.29	67.48
Cst7	0.66	1.58105e-16	5.18071e-15	45.15	64.37	13.13	21.78
Emsy	0.66	1.70203e-14	3.73051e-13	68.76	89.09	18.59	27.29
Rac2	0.66	4.0992e-22	3.08783e-20	750.46	944.84	84.72	89.19
Tinf2	0.66	1.74369e-12	2.25836e-11	95.61	116.79	24.99	33.56
Kbtbd11	0.66	7.20092e-13	1.03263e-11	85.18	107.52	19.69	28.18
Esyt1	0.66	1.10248e-12	1.50674e-11	84.31	103.29	23.5	32.11
Psmb3	0.66	4.74617e-11	4.31701e-10	145.22	164.62	38.11	46.74
Nme2	0.66	2.07208e-06	7.32041e-06	330.24	379.77	62.82	70.22
Cct5	0.66	5.46707e-14	1.06474e-12	126.78	144.46	34.25	43.09
Epb41	0.66	7.43217e-11	6.4899e-10	65.95	95.84	17.15	25.4
Ogfr	0.66	3.7005e-18	1.61675e-16	56.53	72.75	16.88	25.72
Gltp	0.66	6.69378e-14	1.28037e-12	78.36	96.48	22.72	31.43
Sept1	0.66	1.87381e-07	8.09228e-07	346.63	377.56	63.87	71.62
Klhdc2	0.66	1.54695e-16	5.09444e-15	26.08	49.12	7.94	16.28
Arid4a	0.65	3.75434e-12	4.43282e-11	96.92	117.97	24.77	33.32
Adora2a	0.65	4.35608e-10	3.15443e-09	297.67	321.28	52.56	60.89
Hprt	0.65	4.57767e-16	1.38248e-14	99.78	115.85	28.57	37.38
Ogt	0.65	2.27017e-15	5.92732e-14	52.13	73.08	15.22	23.71
Lmbrd1	0.65	3.72146e-15	9.41643e-14	97.81	116.53	25.7	34.36
Ap2s1	0.65	9.77731e-14	1.81005e-12	72.31	90.11	22.06	30.63
Fam49b	0.65	1.5645e-10	1.26268e-09	148.61	167.85	38.89	47.31
P4hb	0.65	8.4228e-12	9.13131e-11	97.86	116.12	27.3	35.81
Atp6v1g1	0.65	8.19223e-11	7.06883e-10	155.57	173.93	40.15	48.59
Rsbn1l	0.65	6.17538e-11	5.50617e-10	176.36	197.83	42.36	50.88
Psma7	0.64	5.15403e-14	1.0128e-12	162.55	174.21	41.26	49.92
Gm8369	0.64	2.53588e-10	1.9418e-09	109.97	138.23	24.1	32.27
Kmt2e	0.64	2.31075e-09	1.44018e-08	256.2	277.89	51.68	59.89
Cox7a2l	0.64	3.52973e-09	2.12514e-08	237.14	261.59	52.9	61.05
Gpsm3	0.64	1.42827e-12	1.88712e-11	103.67	119.38	27.91	36.41
Adk	0.64	6.88243e-15	1.6283e-13	34.36	56.05	9.93	18.13
Ndufv3	0.64	2.01573e-12	2.55268e-11	118.21	135.63	32.05	40.55
Fundc2	0.64	3.40589e-18	1.49839e-16	70.66	84.99	20.68	29.42
Myl12a	0.64	5.02937e-09	2.94944e-08	650.82	744.86	80.42	86.29
Psma1	0.64	1.71883e-17	6.76538e-16	68.29	83.3	20.13	28.74
Fam96a	0.64	1.06891e-18	5.20825e-17	44.16	59.82	14.12	22.75
Scaf11	0.64	7.14357e-13	1.02553e-11	81.61	98.03	21.18	29.54
Tacc1	0.64	1.00253e-12	1.38084e-11	89.85	108.04	24.77	33.2
Sptssa	0.64	1.36805e-13	2.41009e-12	105.83	120.28	26.75	35.25
Ndufc2	0.64	5.06263e-14	9.99335e-13	72.35	88.98	21.79	30.31
Vamp8	0.64	4.00516e-14	8.08246e-13	136.62	148.7	34.91	43.53
Atp5l	0.64	1.10962e-06	4.11305e-06	364.58	403.48	67.29	74.64
Naa20	0.64	6.85923e-17	2.42329e-15	62.05	77.14	17.6	26.13
1810022K09Rik	0.64	2.32064e-12	2.90235e-11	85.5	103.46	25.15	33.48
Thoc7	0.64	2.46986e-17	9.41061e-16	66.99	80.53	18.26	26.85
Aes	0.63	1.56735e-06	5.66244e-06	420.31	476.57	70.66	77.33
Ly6a	0.63	9.44271e-06	2.99385e-05	193.83	256.25	29.45	36.45
Phlpp1	0.63	2.96867e-13	4.74516e-12	60.22	80.85	15.83	24
Psip1	0.63	4.68402e-13	7.09751e-12	96.06	112.78	25.37	33.76
Atp5g1	0.63	8.66446e-16	2.47537e-14	149.66	159.71	37.4	46.06
Pdlim2	0.63	9.12697e-17	3.14809e-15	35.55	51.97	11.2	19.53
Sars	0.63	2.42339e-11	2.34243e-10	89.22	108.55	25.04	33.28
Arpp19	0.63	7.73139e-11	6.70651e-10	191.82	208.46	47.1	55.43
Ctps2	0.63	1.34848e-16	4.52034e-15	40.07	57.11	11.8	20.1
Stk4	0.63	9.18068e-07	3.4568e-06	531.02	578.94	73.03	79.9
Zc3h12d	0.63	7.05384e-17	2.47868e-15	28.28	47.98	8.22	16.36
Dock2	0.63	1.37536e-09	8.95074e-09	172.88	196.86	40.43	48.55
Csnk1g2	0.63	5.84005e-18	2.46921e-16	64.24	78.1	18.97	27.53
Cblb	0.63	2.43672e-07	1.02761e-06	271.34	299.43	50.14	57.88
Lilrb4a	0.63	6.09783e-09	3.50084e-08	102.46	130.15	22.78	30.59
Dnajb6	0.63	3.57131e-13	5.55928e-12	251.73	261.2	52.84	61.25
Cox7b	0.63	1.45511e-10	1.1824e-09	185.04	200.18	44.46	52.65
Rbm7	0.63	5.8266e-12	6.61205e-11	105.66	122.45	30.39	38.71
Ap2m1	0.63	1.91609e-11	1.89542e-10	162.75	178.5	41.31	49.56
Elavl1	0.63	8.48093e-15	1.97793e-13	160.14	171.01	39.82	48.35
Col4a3bp	0.63	7.37048e-14	1.39774e-12	93.9	108.94	24.71	33.04
Ubac2	0.62	1.89055e-14	4.08902e-13	47.6	66.4	14.34	22.55
Erh	0.62	2.69085e-12	3.29001e-11	138.18	152.85	37.45	45.7
Ndufa11	0.62	4.79116e-16	1.44031e-14	90.68	105.38	25.98	34.36
Psma2	0.62	1.99732e-10	1.55826e-09	196.92	214.12	48.37	56.51
Bcl2	0.62	7.83861e-13	1.11796e-11	29.76	63.69	7.78	15.11
Nlrc5	0.62	5.1821e-14	1.01527e-12	45.38	64.49	13.02	21.06
Tln1	0.62	1.94891e-12	2.48004e-11	196.21	207.92	43.79	52.05
Rab11fip1	0.62	1.17894e-14	2.65962e-13	195.25	201.67	39.22	47.59
Faah	0.62	3.03937e-14	6.33338e-13	36.42	55.98	10.98	18.97
Mdm2	0.62	2.4307e-12	3.01982e-11	48.5	67.94	15.22	23.27
Anxa11	0.62	2.90785e-15	7.47317e-14	134.21	145.04	33.48	41.84
Prelid3b	0.61	3.93999e-14	7.98167e-13	67.72	82.72	20.46	28.62
Zbp1	0.61	2.76364e-16	8.6451e-15	21.55	43.25	6.73	14.59
Cript	0.61	7.89978e-16	2.28067e-14	94.31	106.67	25.7	34.04
Tnfrsf18	0.61	9.10022e-09	5.01794e-08	1168.89	1221.29	85.22	91.2
Smap1	0.61	1.15671e-15	3.21208e-14	175.99	183.69	38.17	46.58
4833420G17Rik	0.61	9.08676e-12	9.77834e-11	59.73	79.32	17.48	25.4
Ptpn18	0.61	9.81335e-08	4.45681e-07	504.3	544.76	75.79	82.76
Tasp1	0.61	2.56532e-12	3.16309e-11	53.42	74.2	15	22.91
Grcc10	0.61	4.33308e-13	6.60392e-12	137.97	150.02	36.07	44.29
Cox7c	0.61	5.52284e-07	2.15954e-06	444.61	482.3	74.3	81.15
Xrn2	0.61	2.14504e-16	6.87408e-15	109.53	120.39	28.9	37.22
Actr3	0.61	8.53203e-06	2.72821e-05	424.12	470.96	69.22	75.76
Bak1	0.61	5.75635e-21	3.73507e-19	27.58	42.22	8.44	16.6
Nt5c	0.61	2.21283e-14	4.70073e-13	110.85	120.85	29.51	37.78
Ppil1	0.61	1.9985e-13	3.35395e-12	72.47	91.69	16.88	24.8
Eif2s3y	0.61	1.53013e-12	2.00406e-11	103.39	118.59	28.9	37.06
Ppm1b	0.61	9.1257e-12	9.81156e-11	84.91	102.2	22.95	30.87
Atp5f1	0.61	2.55701e-10	1.9565e-09	145.96	162.32	38.28	46.26
Fam46a	0.61	0.000226339	0.000565935	731.62	808.24	59.57	65.68
Arhgap30	0.61	1.5224e-13	2.64994e-12	80.16	96.47	22.5	30.63
Mia2	0.6	3.52534e-12	4.18918e-11	171.85	188.99	39.88	47.99
Insl6	0.6	2.25737e-26	2.55064e-24	9.11	28.44	2.37	10.17
Rac1	0.6	1.18823e-06	4.38831e-06	446.39	480.01	72.64	79.46
H2afj	0.6	1.12611e-11	1.17422e-10	179.13	192.16	41.64	49.72
Mob4	0.6	5.49146e-17	1.99935e-15	100.89	112.32	27.63	35.93
Krtcap2	0.6	3.93537e-08	1.91822e-07	223.78	242.03	49.48	57.19
Sdhaf1	0.6	8.91556e-15	2.0646e-13	88.35	102.16	22.56	30.71
Gabarap	0.6	2.94361e-06	1.01531e-05	367.42	404.21	68.62	75.56
Ppp4c	0.6	5.12327e-14	1.00877e-12	153.5	164.22	39.88	48.11
Actr10	0.6	1.82276e-13	3.09869e-12	61.81	78.61	19.19	27.21
2310001H17Rik	0.6	1.40124e-18	6.65436e-17	27.84	45.39	7.83	15.76
Larp1	0.6	2.35673e-07	9.98051e-07	108.59	135.6	29.73	37.34
Eif3h	0.6	3.5567e-06	1.20557e-05	440.18	488.56	73.08	79.62
Pitpna	0.6	7.68006e-12	8.39554e-11	112.5	128.18	31.44	39.43
Tmem50a	0.6	7.65827e-11	6.66518e-10	162.98	174.57	40.26	48.19
Arhgap9	0.6	1.74904e-15	4.6219e-14	56.38	71.27	16.05	24.04
Eif3d	0.6	1.28688e-13	2.29486e-12	106.92	120.5	30.12	38.18
Il18r1	0.6	9.1889e-10	6.19223e-09	88.55	113.66	19.75	27.25
Polr1d	0.6	1.04928e-05	3.30124e-05	328.76	364.3	64.64	71.5
H2-M3	0.59	6.81965e-15	1.6193e-13	38.44	55.63	11.86	19.73
Tmem160	0.59	1.55965e-15	4.1634e-14	71.35	84.58	21.46	29.54
Bin2	0.59	4.29359e-10	3.11262e-09	100.89	119.9	26.31	34.08
Slfn2	0.59	4.57778e-14	9.13256e-13	167.1	172.4	32.71	40.8
Hccs	0.59	9.81829e-16	2.76155e-14	62.4	76.49	16.55	24.44
Mri1	0.59	1.49778e-13	2.61403e-12	42.25	59.95	12.74	20.5
Phf11b	0.59	5.16342e-16	1.53811e-14	23.03	40.64	7.12	14.83
Arl5c	0.59	1.76887e-08	9.24794e-08	135.36	156.21	28.57	36.09
Fip1l1	0.59	3.6884e-10	2.71442e-09	128.13	144.75	31.05	38.83
Rab14	0.59	2.7536e-13	4.43929e-12	146.25	160.06	38.22	46.34
Arhgap15	0.59	3.89255e-11	3.61585e-10	127.97	143.75	32.27	40.03
Psmd8	0.59	2.94054e-18	1.31541e-16	137.15	143.11	36.07	44.37
Kif21b	0.59	1.65789e-12	2.16218e-11	51.38	69.64	14.45	22.11
Ppm1m	0.59	2.1181e-14	4.51073e-13	23.9	42.64	8	15.64
Inf2	0.59	1.31696e-13	2.3385e-12	28.19	47.29	9.1	16.68
Arpc1a	0.59	1.71051e-15	4.52922e-14	91.16	102.14	25.81	33.84
Mrps36	0.59	2.7143e-14	5.70133e-13	27.47	45.69	9.21	16.92
Ifnar1	0.59	5.43284e-12	6.2192e-11	236.2	243.21	48.37	56.27
Atl3	0.59	1.86166e-08	9.68283e-08	109.37	130.46	28.57	36.09
Nmi	0.59	8.34158e-14	1.56414e-12	39.07	55.85	12.24	19.94
Aph1a	0.59	1.31463e-12	1.75467e-11	57.45	72.76	18.48	26.33
Gpr68	0.59	5.62085e-14	1.08983e-12	70.13	85.29	19.31	27.13
Sept7	0.59	7.08972e-08	3.29872e-07	183.31	201.14	43.46	50.96
Pink1	0.59	3.18482e-09	1.93257e-08	87.74	106	24.77	32.4
Ube2i	0.59	6.10476e-11	5.45062e-10	303.94	310.77	60.56	68.25
Ubald2	0.58	1.87403e-14	4.05998e-13	1709.43	1994.3	91.01	94.49
Nsa2	0.58	2.15863e-07	9.18909e-07	411.62	440.03	70.05	77.13
Ube2n	0.58	1.50028e-17	6.03194e-16	126.33	134.61	34.31	42.44
Rassf1	0.58	1.46621e-17	5.91309e-16	50.54	63.7	14.23	22.07
S1pr4	0.58	8.95935e-15	2.07108e-13	48.01	64.19	12.85	20.54
Pdcd5	0.58	2.71905e-17	1.02503e-15	79.36	90.81	22.45	30.47
Zmynd11	0.58	5.29641e-11	4.7942e-10	61.09	78.66	18.37	25.96
Higd2a	0.58	2.27925e-12	2.8615e-11	77.88	92.1	22.56	30.31
Bax	0.58	6.95076e-12	7.72065e-11	133.17	147.56	34.58	42.4
Trmt112	0.58	1.69093e-12	2.19653e-11	164.51	172.39	40.54	48.39
Anapc1	0.58	5.40586e-13	8.06082e-12	31.45	50.28	9.76	17.2
Pold4	0.58	1.49712e-11	1.51293e-10	88.02	101.84	24.6	32.32
Pnkd	0.58	5.64106e-15	1.36668e-13	21.21	41.22	6.62	14.03
Tmbim1	0.58	2.73081e-12	3.32338e-11	55.15	71.8	16.49	24.04
Snx4	0.58	1.80621e-12	2.32098e-11	31.41	49.61	10.42	17.89
Aup1	0.58	2.92229e-08	1.46025e-07	240.36	259.87	54.38	61.78
Trac	0.57	1.38812e-09	9.01593e-09	117.61	136.48	30.67	38.26
M6pr	0.57	3.21519e-13	5.07118e-12	151.58	161.61	38.61	46.46
Spin1	0.57	7.29328e-16	2.12429e-14	113.57	120.22	27.69	35.65
Ccng1	0.57	3.50248e-13	5.45861e-12	70.62	85.89	20.13	27.85
Pfn1	0.57	1.19298e-42	3.39921e-40	1300.49	1755.59	93.16	94.9
Hmgn1	0.57	2.6119e-14	5.49505e-13	31.39	49.03	9.32	16.8
Mtch1	0.57	9.62196e-15	2.21254e-13	33.99	49.79	10.98	18.61
Mgst2	0.57	9.08474e-15	2.09637e-13	25.94	44.43	7.67	14.99
Med15	0.57	1.19032e-08	6.42251e-08	96.46	115.43	27.3	34.73
Trf	0.57	3.56399e-19	1.82474e-17	13.47	34.09	3.75	10.93
Ggnbp2	0.57	1.53844e-18	7.15047e-17	96.41	103.4	25.54	33.52
Dnaja1	0.57	2.88319e-09	1.76837e-08	524.04	511.61	68.78	76.05
Bsg	0.57	7.80911e-10	5.35409e-09	135.01	150.13	37.23	44.77
Ptms	0.57	7.41409e-12	8.15239e-11	147.9	159.51	31.83	39.43
Rtn3	0.57	1.28028e-14	2.84901e-13	70.53	84.09	20.79	28.5
Grb2	0.57	4.23491e-07	1.6985e-06	349.93	375.86	63.38	70.38
Pigx	0.57	2.4278e-17	9.27732e-16	43.09	56.58	12.91	20.62
Pomp	0.57	1.56549e-10	1.2627e-09	123.86	138.21	33.81	41.4
Map4k1	0.57	1.38462e-16	4.60615e-15	25.93	41.24	8.38	15.92
Lars2	0.57	2.31429e-06	8.10188e-06	846.21	938.27	73.91	80.27
Bmp2k	0.57	2.00856e-12	2.54605e-11	63.87	79.03	17.48	24.96
Rnh1	0.57	1.74329e-14	3.8002e-13	52.01	64.89	16.05	23.71
Agpat4	0.56	2.04125e-16	6.57362e-15	43.26	56.01	12.08	19.65
Rtf2	0.56	1.29487e-11	1.32593e-10	66.73	82.05	20.35	27.81
Paxbp1	0.56	4.41254e-07	1.76326e-06	150.26	177.68	35.96	43.21
Cyth4	0.56	7.45725e-14	1.41042e-12	132.09	143.65	31.61	39.27
Eif3f	0.56	3.13738e-12	3.77262e-11	777.83	883.33	88.2	92.77
Csnk1d	0.56	2.71934e-16	8.54732e-15	114.49	122.78	30.67	38.59
Tbc1d10c	0.56	5.82389e-14	1.12587e-12	96.23	106.69	24.32	31.91
Gpr160	0.56	1.5261e-29	2.22251e-27	3.88	22.05	1.1	8.32
Slc5a3	0.56	1.13355e-14	2.56814e-13	22.42	44.14	6.34	13.46
Irak2	0.56	1.93171e-10	1.51299e-09	93.84	113.29	23.5	30.79
Atp6v0d2	0.56	4.4025e-26	4.76888e-24	4.53	31.71	1.16	7.92
Ube2d3	0.56	6.83768e-07	2.63593e-06	541.74	577.33	79.15	85.33
Cacna1s	0.56	1.75728e-26	2.03829e-24	3.94	21.28	1.49	8.76
Cst3	0.56	2.44685e-11	2.36162e-10	134.77	145.94	32.32	39.87
Ube2h	0.56	1.31549e-10	1.07831e-09	109.07	121.64	27.91	35.37
Uqcr11	0.56	5.39248e-15	1.3113e-13	75.77	85.88	21.57	29.26
Abhd17a	0.56	6.62707e-15	1.58506e-13	41.91	55.59	13.24	20.74
Tgtp2	0.56	4.44118e-20	2.55309e-18	12.42	32.8	3.03	10.05
H2afv	0.56	1.93236e-10	1.51299e-09	114.16	129.92	30.89	38.34
Zyx	0.56	3.1451e-13	4.9786e-12	52.8	67.03	15.72	23.19
Tmem167	0.56	7.42115e-12	8.15331e-11	107.86	119.66	30.61	38.22
Adipor1	0.56	2.01955e-10	1.57406e-09	160.28	172.24	41.7	49.2
Auh	0.56	1.19605e-13	2.15931e-12	56.05	70.44	16.27	23.63
Rbbp8	0.56	3.51794e-11	3.28651e-10	57.67	75.61	16.6	23.83
Mea1	0.55	2.1164e-13	3.52922e-12	72.05	83.63	21.18	28.74
4833439L19Rik	0.55	9.69633e-15	2.22574e-13	39.55	54.07	12.41	19.86
Znrf1	0.55	1.53053e-12	2.00406e-11	88.09	102.47	23.55	30.99
Ccdc12	0.55	1.41495e-10	1.15406e-09	116.67	130.09	32.1	39.55
Panx1	0.55	6.91825e-10	4.81048e-09	81.73	98.62	23.17	30.39
Aimp1	0.55	9.92438e-20	5.30319e-18	79.06	85.66	22.39	30.23
Pgls	0.55	4.14598e-14	8.34737e-13	81.66	92.18	23.72	31.31
Ndufa7	0.55	3.17686e-11	2.99993e-10	166.99	176.53	41.2	48.75
Rasa3	0.55	4.37887e-10	3.16918e-09	34.37	57.84	9.43	16.2
Cox6b1	0.55	1.24061e-05	3.85141e-05	281.88	305.71	60.07	66.8
Rab19	0.55	2.39439e-18	1.08593e-16	21.84	35.97	6.56	13.91
Srp9	0.55	1.98283e-17	7.71187e-16	180.32	182.37	43.74	51.65
Atox1	0.55	1.02771e-10	8.6625e-10	108.84	124.08	29.9	37.34
Dapk3	0.55	4.96943e-15	1.21974e-13	49.36	63.69	14.95	22.39
Sirt2	0.55	7.51113e-14	1.41856e-12	82.66	93.67	24.82	32.44
Eprs	0.55	3.56083e-08	1.75392e-07	338.04	351.51	46.44	53.66
Gm4070	0.55	3.5691e-16	1.093e-14	20.78	39.74	6.12	13.22
Canx	0.55	3.56611e-09	2.14507e-08	175.45	188.85	42.42	49.64
Ncf4	0.55	2.47976e-12	3.07494e-11	59.42	73.93	18.15	25.48
Crebzf	0.55	1.5034e-11	1.51811e-10	53.76	69.93	15.89	23.15
Rbck1	0.55	4.9595e-17	1.81576e-15	72.72	83.24	21.51	29.06
Ddit3	0.55	6.99132e-09	3.95491e-08	121.76	136.58	28.68	35.85
Tff1	0.55	1.09662e-18	5.30385e-17	13.34	53.76	2.26	8.56
Aurkaip1	0.55	5.86722e-12	6.65239e-11	106.45	119.6	29.95	37.38
Pak2	0.55	6.44658e-07	2.49469e-06	302.88	321.48	59.9	66.84
Atp5j	0.55	7.29631e-10	5.04126e-09	180.55	193.77	44.4	51.77
Esd	0.55	3.34626e-13	5.24008e-12	88.49	99.73	25.7	33.2
Taf10	0.55	2.78233e-07	1.15956e-06	216.27	233.86	50.25	57.32
Plgrkt	0.55	3.15372e-15	8.0734e-14	59.73	70.77	17.71	25.16
Sdhb	0.55	5.16322e-14	1.01309e-12	88.1	97.72	25.92	33.48
Ezr	0.55	2.40723e-10	1.85162e-09	385.65	390.86	61.61	68.93
Optn	0.55	9.05536e-21	5.73375e-19	11.99	27.43	3.86	11.05
Thrap3	0.55	1.86713e-08	9.70745e-08	186.83	206.71	44.62	51.85
Pdcd2	0.55	3.37595e-17	1.24996e-15	51.09	63.16	15.11	22.59
Nudt21	0.55	1.23364e-15	3.37564e-14	106.56	115.05	30.61	38.18
Wnk1	0.54	6.13976e-05	0.000169205	305.19	347.48	57.2	63.71
Cdk2ap1	0.54	1.77427e-14	3.85661e-13	35.52	50.57	10.65	17.89
Leprotl1	0.54	3.7431e-08	1.83405e-07	344.21	355.31	60.4	67.44
Fam3c	0.54	3.26373e-15	8.32251e-14	57.26	66.79	15.5	22.87
Cd48	0.54	7.30449e-15	1.71885e-13	58.68	70.21	17.21	24.6
Fabp5	0.54	3.30167e-10	2.46441e-09	60.85	77.72	14.56	21.54
Lsm4	0.54	1.57162e-15	4.18684e-14	136.42	141.29	34.53	42.12
Arhgef1	0.54	2.07607e-10	1.6149e-09	311.01	318.26	60.73	68.05
H2-Q4	0.54	1.18768e-06	4.38753e-06	640.72	681.7	80.75	86.66
Ube2z	0.54	3.43954e-12	4.09836e-11	65.6	79.67	20.9	28.26
Llph	0.54	2.05945e-16	6.61597e-15	136.73	142.32	34.58	42.24
Tor1aip2	0.54	1.80052e-12	2.31674e-11	90.93	102.98	25.43	32.8
Phb2	0.54	7.91361e-11	6.84645e-10	78.05	91.23	23.22	30.47
B230219D22Rik	0.54	1.2507e-13	2.23641e-12	75.34	86.88	20.9	28.26
Clic4	0.54	6.96759e-13	1.00799e-11	34.77	52.58	9.54	16.52
Nedd8	0.54	2.63483e-12	3.23056e-11	115.74	124.98	31.99	39.39
Cox8a	0.54	3.72162e-14	7.63368e-13	647.35	761.58	83.07	87.02
Zbtb7a	0.54	1.78307e-15	4.70234e-14	54.9	67.2	15.66	22.99
Rrad	0.54	7.52151e-12	8.25665e-11	176.2	175.98	26.48	33.64
Gnpnat1	0.54	8.29985e-13	1.17353e-11	42.84	57.68	12.36	19.45
Pcgf5	0.54	3.68558e-13	5.70329e-12	63.96	77.17	17.98	25.2
Srpk2	0.54	2.26447e-17	8.72954e-16	60.21	73.25	15.44	22.75
Mrpl30	0.54	6.12012e-11	5.46061e-10	100.27	112.38	28.08	35.37
Bag1	0.54	1.37856e-14	3.04702e-13	103.22	110.5	28.9	36.37
Eloc	0.54	7.89207e-12	8.60577e-11	161.82	167.81	40.82	48.23
Vopp1	0.54	1.30554e-12	1.74431e-11	82.01	96.21	21.79	28.98
Gnb2	0.54	2.97565e-06	1.02421e-05	251.66	269.31	53.61	60.37
Capn1	0.54	1.82444e-12	2.34211e-11	50.54	63.83	15.77	22.95
Rab37	0.53	1.8912e-11	1.87504e-10	44.34	58.87	13.68	20.74
Fam103a1	0.53	8.68104e-11	7.45626e-10	176.27	187.8	44.18	51.45
Ifi203	0.53	9.65366e-12	1.02745e-10	65.52	82.12	16.66	23.71
Sla2	0.53	1.10144e-13	2.0064e-12	26.92	43.65	8.16	15.07
Lmnb1	0.53	0.000140667	0.00036495	425.15	465.06	61.94	67.97
Fam169b	0.53	3.33768e-10	2.48845e-09	91.91	109.1	24.21	31.31
Nfkbie	0.53	8.0604e-07	3.07026e-06	136.76	156.22	33.04	39.83
Cenpb	0.53	3.61564e-13	5.61496e-12	33.2	47.98	10.76	17.81
H2-Q6	0.53	8.794e-07	3.32457e-06	614.28	649.7	77.33	83.48
Vmp1	0.53	1.66713e-10	1.33498e-09	73.8	87.73	21.35	28.42
Med14	0.53	6.83557e-12	7.6065e-11	58.31	73.08	16.55	23.59
Oxct1	0.53	7.55217e-12	8.28337e-11	47.39	62.94	14.51	21.54
Sacm1l	0.53	4.61374e-11	4.2141e-10	41.57	57.76	12.69	19.61
Aamp	0.53	5.89337e-10	4.14624e-09	110.03	122.55	31.11	38.22
Atp1b3	0.53	7.60031e-08	3.51384e-07	131.34	150.27	33.04	39.99
Naa10	0.53	3.05575e-16	9.49093e-15	64.6	74.25	18.48	25.84
Mapk1	0.53	9.65802e-13	1.33814e-11	145.7	149.59	36.62	43.93
Atpif1	0.53	5.19289e-12	5.9757e-11	86.64	97.91	23.44	30.63
4921524J17Rik	0.53	2.40789e-11	2.33433e-10	48.62	63.92	14.56	21.5
Pde4b	0.53	9.42179e-14	1.7467e-12	330.71	323.46	52.12	59.57
Brd4	0.53	2.04702e-09	1.28826e-08	178.76	192.6	42.53	49.56
Ghitm	0.53	2.61968e-08	1.31809e-07	302.14	314.55	59.9	66.76
Zeb1	0.53	7.44266e-11	6.49474e-10	267.13	273.33	48.7	55.87
Flna	0.53	8.8707e-11	7.59923e-10	133.08	146.47	31.44	38.59
2410015M20Rik	0.53	1.27099e-14	2.83796e-13	78.4	88.7	23.39	30.71
Sytl1	0.53	4.26787e-18	1.8401e-16	16.05	29.54	5.46	12.46
Lime1	0.52	5.60542e-17	2.02956e-15	17.98	31.71	6.07	13.06
Snx9	0.52	3.88417e-09	2.32253e-08	107.67	122.63	26.25	33.16
Slc25a28	0.52	2.60386e-13	4.21343e-12	52.25	66.62	14.62	21.62
Bcap31	0.52	5.55366e-15	1.348e-13	104.27	112.67	29.51	36.82
Zbtb1	0.52	6.2773e-08	2.95394e-07	106.02	125.68	27.25	34.08
Cct8	0.52	8.36271e-10	5.69486e-09	117.12	129.43	32.87	39.87
S100a6	0.52	0.00204199	0.00435192	512.84	614.48	51.3	56.63
Tmem258	0.52	1.10632e-12	1.5089e-11	167.95	176.4	42.31	49.52
Susd3	0.52	1.14943e-14	2.59751e-13	20.41	36.2	6.51	13.38
Cox6c	0.52	0.00020587	0.00051961	365.8	405.21	67.51	73.31
Glrx3	0.52	4.17913e-14	8.40121e-13	74.82	84.47	22.72	29.94
Tnfrsf9	0.52	8.05533e-05	0.000217559	1647.48	1701.9	78.71	83.88
Pex16	0.52	1.14691e-07	5.15165e-07	46.65	66.48	15.44	22.11
Xbp1	0.52	2.00331e-09	1.2642e-08	232.06	241.59	47.88	54.86
Traf3ip3	0.52	3.91554e-14	7.94442e-13	36	49.41	10.54	17.44
Dus2	0.52	4.44466e-13	6.75826e-12	36.53	50.35	11.03	17.93
Txn1	0.52	1.29202e-05	3.99494e-05	184.75	202.73	42.31	48.79
Snx2	0.52	1.09436e-10	9.13033e-10	83.71	94.02	23.22	30.23
Arrb2	0.52	6.68566e-10	4.65864e-09	79.75	93.27	22.06	28.94
Ssr2	0.52	4.1048e-15	1.02871e-13	47.55	57.8	15.17	22.23
Arpc2	0.52	5.37608e-06	1.76703e-05	633.35	685.22	82.18	87.26
Fam96b	0.52	8.53504e-06	2.72851e-05	147.95	167.09	39.93	46.54
Ube2v1	0.52	6.46905e-13	9.46315e-12	92.29	102.1	27.69	34.81
Hspa4	0.52	7.79827e-11	6.75558e-10	176.51	184.5	42.64	49.76
Ech1	0.52	6.82485e-13	9.89527e-12	66.75	77.74	18.81	25.8
Osbpl3	0.51	8.91237e-08	4.07161e-07	68.73	85.23	20.24	26.89
Dnaja2	0.51	4.75318e-08	2.27954e-07	160.71	173.16	40.87	47.71
Twsg1	0.51	2.48358e-13	4.03874e-12	36.66	50.16	10.81	17.64
Il6st	0.51	3.97743e-08	1.93512e-07	123.22	140.59	28.08	34.85
Bri3	0.51	9.59392e-12	1.02317e-10	124.1	132.88	32.16	39.23
Ky	0.51	2.20156e-06	7.74653e-06	103.29	123.65	22.45	28.78
Il16	0.51	4.30806e-08	2.08042e-07	122.55	138.91	29.9	36.66
Rwdd1	0.51	2.03804e-14	4.35769e-13	119.13	124.67	31	38.18
Adss	0.51	4.05792e-11	3.75351e-10	120.61	128.94	31.49	38.5
Pfkp	0.51	5.51849e-09	3.19906e-08	83.04	97.57	22.67	29.42
Pnn	0.51	1.26674e-14	2.83796e-13	100.56	108.43	25.98	33.04
Elob	0.51	3.36147e-05	9.69602e-05	329.66	347.76	63.82	69.98
Spcs2	0.51	1.09575e-08	5.95687e-08	198.55	209.03	45.78	52.53
Mdh2	0.51	8.77137e-14	1.6377e-12	193.97	198.2	46.06	53.18
Aplp2	0.51	1.66732e-10	1.33498e-09	169.98	175.51	37.62	44.61
Tspo	0.51	6.60963e-08	3.09623e-07	176.09	188.02	42.31	49.04
Flii	0.51	6.28626e-12	7.06638e-11	60.58	73.39	17.82	24.64
Dxo	0.51	9.94326e-15	2.27843e-13	35.13	49.15	10.2	16.92
Cox7a2	0.51	4.25716e-08	2.05975e-07	209.33	219.96	49.86	56.63
Uqcrc2	0.51	4.75441e-10	3.41832e-09	108.16	120.16	31.27	38.14
Akt1	0.51	1.63784e-16	5.35341e-15	47.48	56.93	14.73	21.74
Golph3	0.51	2.73554e-10	2.08822e-09	93.39	105.97	26.86	33.72
Rtcb	0.5	1.26583e-11	1.29822e-10	63.26	76.71	19.53	26.29
Was	0.5	5.74748e-16	1.69667e-14	88.27	95.47	24.27	31.35
Vamp2	0.5	6.24478e-11	5.55294e-10	92.34	102.96	25.54	32.4
Cdc37	0.5	3.78485e-12	4.45446e-11	194.18	197.77	45.84	52.81
Ndufv2	0.5	2.54712e-12	3.14657e-11	76.26	86.09	22.89	29.74
Atp5g2	0.5	7.1657e-07	2.75266e-06	563.69	622.11	81.41	86.01
Mrpl33	0.5	3.72467e-06	1.25693e-05	204.14	220.55	46.99	53.46
Paics	0.5	2.56659e-10	1.96268e-09	50.21	65.25	15.94	22.63
Snrpf	0.5	1.82586e-05	5.52436e-05	232.74	250.13	53.01	59.28
Gna15	0.5	7.08465e-15	1.67313e-13	86.55	94.56	22.72	29.7
Ociad1	0.5	1.91892e-14	4.13672e-13	156.18	162.2	38.67	45.78
Zyg11b	0.5	2.35026e-15	6.12422e-14	18.33	33.14	5.63	12.18
Irgm1	0.5	3.65882e-18	1.60388e-16	9.5	27.67	2.7	9.08
Pde7a	0.5	6.44078e-14	1.23593e-12	48.27	60.32	12.69	19.37
Bcl10	0.5	3.23862e-10	2.42702e-09	133.83	144.42	34.2	41
Tagap	-0.5	3.79685e-09	2.2755e-08	107.34	71.92	24.27	18.93
Hilpda	-0.5	8.87157e-18	3.66813e-16	230.95	151.66	37.18	33.16
Dusp10	-0.5	3.9941e-12	4.67417e-11	417.39	313.94	52.56	48.71
Tagln2	-0.51	2.49319e-13	4.04934e-12	651.23	520.32	73.63	70.14
Irf4	-0.51	9.82251e-13	1.35832e-11	96.49	54.18	19.86	14.59
Rgcc	-0.51	2.2389e-09	1.39673e-08	70	41.31	15	9.28
Jmjd1c	-0.52	7.78656e-11	6.74989e-10	133.23	96.6	33.26	27.97
Pdlim1	-0.52	5.87862e-10	4.1403e-09	78.88	45.02	18.26	12.58
Ncor1	-0.52	8.10109e-25	7.98354e-23	348.32	260.17	63.15	59.53
Cxcl2	-0.52	3.49589e-07	1.42832e-06	316.26	165.34	15.83	10.85
AC149090.1	-0.53	1.02887e-11	1.08229e-10	188.67	138.92	40.65	35.65
Klf4	-0.53	1.56364e-13	2.70772e-12	83.7	37.37	15.5	9.93
Nr1d2	-0.53	3.42138e-13	5.35132e-12	134.55	96.06	33.26	27.85
Slamf1	-0.54	2.56339e-17	9.71051e-16	178.89	126.04	37.95	33.12
Hivep2	-0.54	2.17173e-10	1.68033e-09	112.05	79.78	28.85	23.15
Nfkbia	-0.54	3.97599e-26	4.34277e-24	3840.22	2921.65	94.54	93.45
Gm26778	-0.54	2.14637e-11	2.09944e-10	115.1	74.6	26.42	20.78
Arap2	-0.56	1.84792e-18	8.4985e-17	259.39	180.3	45.39	40.72
Tnfaip3	-0.56	8.8483e-38	2.03464e-35	2615.19	1955.5	97.41	96.26
Lgals7	-0.57	5.57153e-22	4.14921e-20	38.24	8.11	9.1	2.45
Mmp9	-0.57	4.90928e-16	1.46909e-14	47.75	17.81	12.02	5.47
Cpm	-0.57	8.13498e-12	8.84122e-11	318.61	249.41	52.12	47.11
Antxr2	-0.58	8.66861e-16	2.47537e-14	177.64	125.41	39.05	33.6
Emp1	-0.58	7.05517e-22	5.22441e-20	56.11	19.13	12.63	6.35
Sept11	-0.58	2.91795e-17	1.09273e-15	105.69	66.82	27.3	21.26
Klf7	-0.58	9.37985e-14	1.74138e-12	69.15	35.08	18.04	11.5
Pik3r1	-0.59	2.08699e-20	1.2664e-18	153.39	99.83	34.69	29.1
Itk	-0.59	4.04814e-25	4.1131e-23	670.5	507.96	80.42	76.93
Ubc	-0.6	2.37174e-26	2.65696e-24	906.83	681.27	86.65	83.52
Ugcg	-0.6	2.74907e-16	8.6201e-15	79.91	38.59	18.2	11.74
Pxdc1	-0.6	3.0804e-17	1.14376e-15	54.68	18.33	11.09	4.14
Myo1e	-0.6	1.53207e-18	7.1462e-17	208.58	143.57	40.65	35.29
Il10ra	-0.6	6.41568e-14	1.233e-12	116.84	66.4	22.61	16.48
Zc3h12a	-0.61	7.64273e-20	4.17388e-18	332.5	246.68	59.24	54.26
Gm15340	-0.61	1.54397e-20	9.50084e-19	111.21	54.33	21.62	15.51
Raph1	-0.61	1.21403e-11	1.24998e-10	75.63	40.85	17.87	10.97
Map4k4	-0.61	3.23369e-13	5.09423e-12	145.81	102.47	35.08	28.78
Elmsan1	-0.61	1.8477e-16	5.99452e-15	108.96	64.34	25.92	19.53
Tubb4b	-0.62	1.9407e-14	4.1768e-13	194.13	139.89	42.8	36.82
Ahr	-0.62	1.29608e-18	6.24549e-17	122.95	71.74	27.14	20.86
Il7r	-0.63	2.31136e-12	2.89351e-11	450.64	352.09	63.6	58.24
Hspa5	-0.64	4.33956e-28	5.57634e-26	1587.53	1208.95	94.59	91.48
Txnip	-0.68	3.33257e-22	2.55439e-20	243.05	152.24	42.42	36.37
Ccr2	-0.68	1.87946e-09	1.19063e-08	313.29	221.73	38.61	32.19
Itpkb	-0.69	2.6825e-18	1.20823e-16	405.38	311	64.53	58.84
Cd40lg	-0.69	6.11684e-20	3.38284e-18	63.37	21.46	13.29	5.43
Iqgap1	-0.7	2.31004e-25	2.38407e-23	417.31	299.46	66.46	61.09
1700061F12Rik	-0.7	3.15426e-21	2.13107e-19	70.13	20.68	12.08	4.38
Chd7	-0.7	1.9482e-15	5.12752e-14	213.65	149.68	44.13	37.26
Lrrc8d	-0.7	5.33821e-18	2.27168e-16	154.79	102.91	37.18	30.02
Smco4	-0.71	3.44962e-33	5.98617e-31	238.77	136.69	43.13	37.14
Cd164	-0.71	3.21071e-33	5.68685e-31	239.82	156.67	49.15	43.05
Snhg12	-0.72	2.3477e-20	1.41153e-18	220.76	155.8	46.72	39.87
Zfp36l2	-0.72	6.20184e-21	3.98468e-19	671.42	454.36	63.43	58.52
Tmem64	-0.73	2.07457e-20	1.26472e-18	825.36	618.98	75.46	70.5
Atp2b1	-0.75	6.82254e-25	6.77447e-23	448.92	329.77	67.29	61.41
Dennd4a	-0.75	1.73987e-44	5.56208e-42	1017.64	723.32	87.37	83.8
Tex2	-0.77	1.19625e-24	1.14447e-22	208.24	136.1	44.02	36.74
Klf6	-0.77	1.19556e-35	2.37427e-33	676.12	445.31	68.28	63.79
Nr4a1	-0.79	6.65634e-36	1.34222e-33	982.47	566.74	67.46	63.38
Cited2	-0.79	3.30908e-18	1.46527e-16	270.52	170.37	44.29	36.78
Bcl6	-0.8	8.44459e-22	6.14907e-20	101.13	41.45	19.14	10.41
Tiparp	-0.83	1.2031e-28	1.60908e-26	155.1	75.37	29.34	21.14
Nr1d1	-0.83	9.45985e-34	1.72209e-31	55.52	11.23	12.91	3.26
Foxp1	-0.84	2.27172e-19	1.20062e-17	224.85	147.31	43.02	34.77
Kctd12	-0.86	1.38044e-16	4.60392e-15	366.53	255.41	52.79	44.86
Zeb2	-0.87	7.14689e-23	5.81828e-21	104.91	41.7	19.8	10.29
Nebl	-0.88	4.32857e-24	3.91273e-22	93.89	43.92	23.72	13.91
Thy1	-0.9	5.34465e-24	4.79811e-22	366.41	248.4	57.36	49.4
Odc1	-0.92	8.50768e-81	1.593e-77	4324.72	2467.02	92.44	90.72
Spry1	-0.93	2.05418e-26	2.34123e-24	89.22	31.65	17.98	7.48
Smap2	-0.94	5.37587e-42	1.43799e-39	296.89	178.59	53.5	45.34
Samsn1	-0.94	1.6509e-43	5.03218e-41	827.59	575.65	85.44	79.1
Adam8	-1.01	1.62367e-24	1.53104e-22	106.81	50.7	26.2	14.83
Ctla2a	-1.01	1.1762e-20	7.37626e-19	326.9	208.61	48.15	38.42
Ptpn13	-1.02	2.22976e-21	1.53818e-19	199.83	115.75	36.35	25.76
Dusp1	-1.03	5.74391e-62	3.83547e-59	2165.72	1279.3	92.06	88.06
Cd69	-1.03	6.11154e-34	1.12822e-31	461.32	282.89	58.91	50.36
Irf2bp2	-1.09	1.05464e-21	7.47198e-20	393.46	264.04	57.92	47.51
Pdcd1	-1.1	1.77905e-22	1.39586e-20	440.07	255.93	43.08	33.04
Tnfsf8	-1.1	1.46891e-20	9.08161e-19	458.25	268.97	42.53	32.36
Il10	-1.11	1.52326e-47	5.87215e-45	444.14	173.45	34.86	26
Sertad1	-1.11	1.89274e-36	3.95419e-34	156.97	81.71	37.12	25.28
4930503L19Rik	-1.12	4.51214e-42	1.2321e-39	135.85	50.61	27.63	15.8
Tnfsf11	-1.14	1.67656e-45	5.93908e-43	140.39	26.38	17.87	5.95
Furin	-1.15	2.35451e-36	4.82196e-34	273.57	154.24	47.21	36.09
Klrg1	-1.2	3.02463e-24	2.77229e-22	420.65	237.17	43.68	32.44
Zfp36	-1.2	7.92858e-32	1.299e-29	1131.21	707.65	72.2	63.55
Rasgrp1	-1.2	2.69126e-37	5.87906e-35	263.85	153.27	50.69	38.87
Ier5	-1.23	2.57037e-40	6.47881e-38	694	455.95	75.62	65.59
Abcb1a	-1.29	5.75739e-31	8.98359e-29	266.79	158.14	50.36	37.02
Nr3c1	-1.3	1.69851e-59	9.6793e-57	814.97	519.41	83.56	74
Zfp36l1	-1.32	1.36624e-97	5.96909e-94	2725.01	1503.62	94.48	89.35
Atf3	-1.33	1.90062e-36	3.95419e-34	215.58	85.58	31.44	17.6
Ipmk	-1.33	5.50466e-43	1.60332e-40	289.71	152.57	48.54	35.49
Cd44	-1.35	2.2875e-63	1.76366e-60	385.49	200.94	58.03	46.18
Nrip1	-1.38	1.9943e-55	1.00536e-52	829.04	511.79	80.42	70.02
Gm26669	-1.5	2.48699e-67	2.50746e-64	915.86	504.31	78.71	67.85
Cd28	-1.52	1.31657e-51	5.56654e-49	606.55	368.03	72.48	59.24
Fosb	-1.52	2.90665e-42	8.10584e-40	211.1	89.94	36.85	20.58
Mid1	-1.65	2.2958e-51	9.40346e-49	160.23	61.16	35.52	16.92
Ahnak	-1.77	1.08561e-87	3.55728e-84	995.9	514.63	81.14	68.05
Fos	-2.06	2.86622e-80	4.69595e-77	1034.13	461.2	70.77	54.42
Lmna	-2.36	2.63883e-79	3.84302e-76	751.69	324.01	65.75	44.17
