# Supplementary material for: Immunomodulatory effects of PI3Kδ inhibition in solid tumors – evaluation in a randomized phase II trial
Source: Research Square preprint supplement (doi:10.21203/rs.3.rs-337290/v1), 2021-03-19
Supplement: Supplementary file 3 [file 633fa85099f4099522f94016.xlsx]

## Sheet: BulkRNA Drug_DEG_93_logFC.75
Genes	baseMean	log2FoldChange	lfcSE	stat	pvalue	padj
TCL1A	36.2505	2.35236	0.67429	3.48865	0.000485458	0.0696039
LILRA4	53.5615	2.23466	0.632226	3.53459	0.00040841	0.0655781
FCER1A	153.191	1.8506	0.479798	3.85704	0.000114767	0.0373054
SPIB	81.7712	1.8058	0.534959	3.37559	0.000736578	0.089785
HNRNPA1P21	66.2088	1.79064	0.47499	3.76985	0.000163347	0.0414587
KCNK17	40.7963	1.67528	0.420413	3.98484	6.75e-05	0.0293491
TDO2	419.798	1.64115	0.490305	3.34719	0.000816338	0.0947034
MIR214	107.579	1.64081	0.436283	3.76089	0.000169312	0.0418649
CXCL6	619.574	1.54156	0.303132	5.08544	3.67e-07	0.00169893
LTB	496.691	1.52397	0.375094	4.06291	4.85e-05	0.0249434
CD1A	162.764	1.52184	0.382299	3.98076	6.87e-05	0.0293491
GJA4	416.377	1.48639	0.342602	4.33852	1.43e-05	0.0132889
APLNR	1377.63	1.47018	0.388267	3.78652	0.000152771	0.0404362
FUT7	100.116	1.46669	0.351207	4.17614	2.96e-05	0.0189431
ZNF582	35.3445	1.46406	0.386471	3.78829	0.000151688	0.0404362
GCKR	40.4899	1.44212	0.340998	4.22912	2.35e-05	0.016974
CCR7	288.471	1.43902	0.420388	3.42307	0.000619172	0.0813618
CEACAM3	45.4134	1.41574	0.397064	3.56553	0.000363123	0.0655475
FOXP3	217.393	1.41235	0.376219	3.75407	0.000173985	0.0418649
AOC1	179.834	1.40076	0.35845	3.90782	9.31e-05	0.0338338
SOX17	110.743	1.38034	0.335921	4.10911	3.97e-05	0.0210257
CCM2L	87.9173	1.35948	0.273275	4.97476	6.53e-07	0.00201738
FAM110D	101.356	1.34984	0.38459	3.50981	0.000448421	0.06744
TDRD10	102.027	1.3141	0.38309	3.43026	0.000603001	0.0798029
TNFRSF4	273.787	1.24622	0.351832	3.54208	0.000396986	0.0655781
WFDC1	192.722	1.24263	0.281616	4.41249	1.02e-05	0.00996503
RP11-229P13.20	39.8256	1.24013	0.325753	3.80698	0.000140675	0.0404362
SOX18	550.346	1.23414	0.254541	4.8485	1.24e-06	0.00288112
COX7A1	369.133	1.23229	0.246027	5.00875	5.48e-07	0.00201738
EGFL7	1866.89	1.231	0.26182	4.7017	2.58e-06	0.00434578
NAPSB	429.302	1.22642	0.347998	3.52422	0.000424729	0.0655781
PTGIR	259.714	1.21294	0.315809	3.84073	0.000122669	0.0385223
KANK3	258.756	1.19553	0.251309	4.75723	1.96e-06	0.00393592
PPP1R14A	178.614	1.18604	0.294103	4.03275	5.51e-05	0.0276062
S100B	328.137	1.17597	0.253947	4.63078	3.64e-06	0.00451858
RAMP2	474.888	1.1376	0.291958	3.89646	9.76e-05	0.0341229
RAMP3	808.94	1.12989	0.307496	3.67449	0.000238326	0.0527711
CPLX1	156.195	1.11038	0.306514	3.6226	0.000291654	0.058105
AQP1	4270.99	1.08572	0.28523	3.80646	0.000140968	0.0404362
SLC19A3	109.453	1.08548	0.317806	3.41555	0.000636538	0.0823851
PRSS30P	20.2938	1.08426	0.300525	3.60788	0.000308711	0.0595812
ARHGEF15	587.246	1.07265	0.249945	4.29153	1.77e-05	0.0147765
GPR162	149.376	1.06845	0.257582	4.14801	3.35e-05	0.0194181
CPNE5	417.708	1.06411	0.300197	3.54468	0.000393085	0.0655781
TAL1	169.383	1.06243	0.273864	3.87942	0.000104704	0.0359252
ECSCR	270.418	1.05813	0.302622	3.49653	0.000471358	0.0693121
PHOSPHO1	77.5343	1.05526	0.294254	3.58621	0.000335513	0.0627918
CTD-2562J17.7	167.658	1.04736	0.308105	3.39937	0.000675401	0.085128
C17orf72	47.2787	1.04464	0.296102	3.52798	0.000418739	0.0655781
NES	2423.45	1.04028	0.31246	3.32931	0.000870601	0.0989064
MMP25	403.475	1.02478	0.264938	3.868	0.00010973	0.0363049
HSPA12B	391.995	1.02177	0.290654	3.5154	0.000439093	0.0666845
CLEC14A	617.146	1.02144	0.257818	3.96186	7.44e-05	0.0299536
RP11-389C8.2	137.566	1.02001	0.245568	4.15366	3.27e-05	0.0194181
ENG	3668.32	1.01983	0.246705	4.13379	3.57e-05	0.0200343
ESAM	1141.31	1.00367	0.24136	4.15839	3.2e-05	0.0194181
ACVRL1	943.546	0.992907	0.278545	3.56462	0.000364389	0.0655475
SHC2	447.926	0.98431	0.23893	4.11967	3.79e-05	0.0206762
NAALADL1	117.72	0.976629	0.25827	3.78142	0.000155937	0.040693
IFITM2	3775.81	0.966731	0.203899	4.74122	2.12e-06	0.00393592
AC011526.1	258.739	0.96466	0.264196	3.6513	0.000260914	0.0549343
HLX	233.545	0.964001	0.227472	4.23788	2.26e-05	0.016974
LRRC32	987.244	0.926996	0.233899	3.96323	7.39e-05	0.0299536
EXOC3L2	207.974	0.924276	0.179638	5.14522	2.67e-07	0.00165023
GIPC3	142.042	0.923611	0.273155	3.38127	0.000721506	0.089785
CFP	159.973	0.90899	0.269611	3.37149	0.000747628	0.0905363
SH2D3C	612.79	0.901394	0.2328	3.87196	0.000107963	0.0363049
ROBO4	815.884	0.893545	0.252974	3.53216	0.000412181	0.0655781
TMEM204	600.829	0.89153	0.265087	3.36315	0.000770575	0.0915206
LIMS2	676.001	0.886973	0.263402	3.36738	0.000758864	0.0913002
GMFG	676.299	0.886166	0.24373	3.63584	0.000277071	0.0560791
VASN	1101.36	0.885951	0.262273	3.37797	0.000730233	0.089785
PLVAP	3265.61	0.878032	0.224044	3.91902	8.89e-05	0.0329464
FAM132A	242.021	0.872139	0.202867	4.29906	1.72e-05	0.0147765
DLL4	390.995	0.870715	0.237414	3.66749	0.000244944	0.0527711
LYL1	222.718	0.854759	0.225499	3.79053	0.000150329	0.0404362
NOTCH4	1036.27	0.846742	0.212893	3.97732	6.97e-05	0.0293491
SNCG	510.891	0.839269	0.237644	3.53162	0.000413017	0.0655781
JAK3	1350.4	0.830264	0.229785	3.61322	0.000302423	0.0589821
DOK1	323.38	0.827142	0.235782	3.50808	0.000451347	0.06744
SLC9A3R2	2056.33	0.803656	0.191727	4.19167	2.77e-05	0.0187215
CETP	74.9276	0.784867	0.233316	3.36396	0.000768322	0.0915206
RP11-332H18.4	59.8755	0.751661	0.21071	3.56728	0.000360701	0.0655475
LINC00641	498.983	-0.798782	0.238616	-3.34756	0.000815267	0.0947034
MLK4	360.32	-0.82562	0.186565	-4.42537	9.63e-06	0.00991011
VPS13A	1870.44	-0.878256	0.248044	-3.54073	0.000399021	0.0655781
MCOLN3	361.062	-0.992027	0.21336	-4.64955	3.33e-06	0.00451858
GPR126	878.801	-1.12365	0.199342	-5.63677	1.73e-08	0.00032103
HS6ST2	410.526	-1.16164	0.340583	-3.41073	0.000647884	0.0827861
RP1-68D18.4	55.3682	-1.49448	0.353663	-4.22571	2.38e-05	0.016974
CXCL17	838.194	-2.19435	0.611756	-3.58697	0.000334548	0.0627918
BPIFA2	958.314	-13.851	2.97106	-4.66198	3.13e-06	0.00451858
BPIFB2	2764.6	-15.7769	2.96151	-5.3273	9.97e-08	0.000923485

## Sheet: GeneOntology Bulk RNA
Table S2. Gene Ontology Analysis.
Analysis Type:	PANTHER Overrepresentation Test (Released 20200728)
Annotation Version and Release Date:	GO Ontology database DOI: 10.5281/zenodo.4081749 Released 2020-10-09
Analyzed List:	upload_1 (Homo sapiens)
Reference List:	Homo sapiens (all genes in database)
Test Type:	FISHER
Correction:	FDR
GO biological process complete	Homo sapiens - REFLIST (20851)	upload_1 (83)	upload_1 (expected)	upload_1 (over/under)	upload_1 (fold Enrichment)	upload_1 (raw P-value)	upload_1 (FDR)
endothelial cell development (GO:0001885)	52	4	0.21	+	19.32	7.21e-05	0.0497
negative regulation of T-helper cell differentiation (GO:0045623)	17	3	0.07	+	44.33	6.53e-05	0.0493
lymph vessel morphogenesis (GO:0036303)	17	3	0.07	+	44.33	6.53e-05	0.0471
ventricular trabecula myocardium morphogenesis (GO:0003222)	16	3	0.06	+	47.1	5.56e-05	0.0441
negative regulation of cytokine secretion (GO:0050710)	15	3	0.06	+	50.24	4.7e-05	0.0392
regulation of immune system process (GO:0002682)	1708	19	6.8	+	2.79	3.55e-05	0.0313
lymphangiogenesis (GO:0001946)	12	3	0.05	+	62.8	2.64e-05	0.0247
dorsal aorta development (GO:0035907)	9	3	0.04	+	83.74	1.29e-05	0.0128
dorsal aorta morphogenesis (GO:0035912)	8	3	0.03	+	94.21	9.69e-06	0.011
anatomical structure morphogenesis (GO:0009653)	2182	23	8.69	+	2.65	1.02e-05	0.0108
regulation of cell population proliferation (GO:0042127)	1667	20	6.64	+	3.01	6.99e-06	0.00854
lymph vessel development (GO:0001945)	24	4	0.1	+	41.87	4.37e-06	0.00578
anatomical structure formation involved in morphogenesis (GO:0048646)	889	15	3.54	+	4.24	2.35e-06	0.00339
endothelial cell differentiation (GO:0045446)	81	6	0.32	+	18.61	1.26e-06	0.002
vasculogenesis (GO:0001570)	70	6	0.28	+	21.53	5.66e-07	0.000998
tube development (GO:0035295)	860	16	3.42	+	4.67	2.87e-07	0.00057
endothelium development (GO:0003158)	95	8	0.38	+	21.16	7.58e-09	2e-05
tube morphogenesis (GO:0035239)	664	16	2.64	+	6.05	8.81e-09	2e-05
circulatory system development (GO:0072359)	871	20	3.47	+	5.77	1.99e-10	6.31e-07
blood vessel morphogenesis (GO:0048514)	415	15	1.65	+	9.08	1.3e-10	5.17e-07
blood vessel development (GO:0001568)	502	17	2	+	8.51	1.75e-11	9.27e-08
angiogenesis (GO:0001525)	323	15	1.29	+	11.67	4.38e-12	3.47e-08
vasculature development (GO:0001944)	525	19	2.09	+	9.09	3.04e-13	4.82e-09

## Sheet: CD8 postDrugvsREM_455_logFC.75
Genes	baseMean	log2FoldChange	lfcSE	stat	pvalue	padj
GZMB	32686.5	1.66743	0.224412	7.43019	1.08e-13	1.33e-09
OSM	734.921	9.15661	1.26413	7.24341	4.38e-13	2.69e-09
SPP1	1918.38	6.61043	0.93522	7.06831	1.57e-12	6.43e-09
ZNF592	501.898	5.76348	0.822593	7.00647	2.44e-12	7.51e-09
WARS	2529.35	3.29369	0.477984	6.89079	5.55e-12	1.36e-08
CDKN1A	724.304	4.99959	0.739679	6.75913	1.39e-11	2.84e-08
PAK1IP1	345.488	6.11469	0.922321	6.62968	3.36e-11	5.91e-08
C9orf64	293.302	11.3128	1.72313	6.56527	5.19e-11	7.98e-08
MAL	382.661	8.46642	1.33751	6.32997	2.45e-10	3.35e-07
ACPL2	347.358	7.0767	1.1358	6.23059	4.65e-10	5.71e-07
HJURP	193.26	10.8566	1.85417	5.85522	4.76e-09	5.26e-06
ADAM12	312.211	10.1501	1.74121	5.82932	5.57e-09	5.26e-06
IFNG	4648.63	1.82	0.311825	5.8366	5.33e-09	5.26e-06
ELOVL6	234.129	9.38335	1.61894	5.79599	6.79e-09	5.96e-06
TMEM97	209.71	10.4623	1.82125	5.74457	9.22e-09	7.55e-06
MCM10	205.5	11.483	2.0155	5.69732	1.22e-08	9.35e-06
RIPK2	243.208	8.70469	1.53473	5.6718	1.41e-08	1.02e-05
POLR3F	185.085	10.6564	1.89299	5.62942	1.81e-08	1.23e-05
SUSD1	185.164	10.4446	1.86291	5.60659	2.06e-08	1.3e-05
ZNF304	192.676	10.3408	1.84583	5.60225	2.12e-08	1.3e-05
EPAS1	182.104	10.4111	1.87909	5.5405	3.02e-08	1.69e-05
IL8	1805.02	6.16773	1.11289	5.54209	2.99e-08	1.69e-05
METTL6	131.101	10.8619	1.9646	5.52879	3.22e-08	1.72e-05
NCEH1	238.966	6.82804	1.25873	5.42453	5.81e-08	2.98e-05
ZNF678	266.382	6.88682	1.27138	5.41681	6.07e-08	2.98e-05
SLFN12	206.327	10.0463	1.89594	5.29886	1.17e-07	5.51e-05
THG1L	226.227	9.4232	1.78526	5.27834	1.3e-07	5.94e-05
PIK3R3	192.661	9.80046	1.8666	5.25044	1.52e-07	6.22e-05
IL2RA	1128.5	5.36565	1.02177	5.25131	1.51e-07	6.22e-05
VWA5A	286.043	9.14672	1.74088	5.25409	1.49e-07	6.22e-05
ZNF569	195.771	9.76699	1.86583	5.23468	1.65e-07	6.55e-05
DHCR24	255.647	11.2798	2.16425	5.2119	1.87e-07	7.18e-05
IL1RAP	167.602	9.83881	1.90205	5.17273	2.31e-07	8.34e-05
ZNF605	158.411	9.03785	1.74666	5.17436	2.29e-07	8.34e-05
ZNF449	195.354	9.41827	1.8462	5.10143	3.37e-07	0.000118396
ERCC8	160.794	9.5491	1.88697	5.06054	4.18e-07	0.000129004
FAM220A	211.134	9.17664	1.81266	5.06252	4.14e-07	0.000129004
FAN1	184.639	9.39132	1.85285	5.06858	4.01e-07	0.000129004
TIMP1	617.205	3.86874	0.763759	5.06539	4.08e-07	0.000129004
ABCD1	170.979	8.26667	1.6338	5.05977	4.2e-07	0.000129004
S100A9	739.639	6.68696	1.33575	5.00616	5.55e-07	0.000166484
LRRC42	251.184	5.30849	1.06226	4.99735	5.81e-07	0.000170125
PDGFRB	243.739	7.33267	1.47207	4.9812	6.32e-07	0.000180657
NUF2	155.957	9.64987	1.94439	4.96292	6.94e-07	0.000189693
WDR5B	126.429	10.0848	2.0316	4.96394	6.91e-07	0.000189693
PRDM4	530.24	5.49412	1.10939	4.95236	7.33e-07	0.000195935
SLCO4A1	188.033	6.92205	1.40016	4.94374	7.66e-07	0.000200444
IL1RN	654.934	7.42464	1.50482	4.93391	8.06e-07	0.000206421
CD59	687.784	3.83784	0.787099	4.87593	1.08e-06	0.000271687
CD69	17124.1	1.32708	0.274092	4.84174	1.29e-06	0.000310242
CD40LG	254.974	10.1889	2.10318	4.84452	1.27e-06	0.000310242
CXCR4	14162.4	1.33573	0.276719	4.82701	1.39e-06	0.000327644
GNLY	21883.3	1.21881	0.253115	4.81525	1.47e-06	0.000340999
RBKS	103.72	9.84306	2.05061	4.80005	1.59e-06	0.000360863
PRF1	21054.3	1.37377	0.286409	4.79651	1.61e-06	0.000360863
IL7R	6363.24	-1.50481	0.314338	-4.78724	1.69e-06	0.000371176
WDR53	248.125	5.93949	1.24302	4.77828	1.77e-06	0.000381307
NFIA	149.292	-6.64386	1.39484	-4.76316	1.91e-06	0.000401908
BTN2A2	459.464	4.90075	1.03015	4.75734	1.96e-06	0.000401908
FAM214B	159.561	8.9807	1.8868	4.75975	1.94e-06	0.000401908
FAM49A	262.585	6.48877	1.36667	4.74786	2.06e-06	0.000414305
IMPAD1	266.167	6.03493	1.27261	4.74218	2.11e-06	0.000419219
NRIP1	197.535	7.0726	1.49258	4.73851	2.15e-06	0.000420099
RAB11FIP4	676.681	3.77975	0.798343	4.73449	2.2e-06	0.000421813
TMEM237	140.383	8.0332	1.70909	4.70028	2.6e-06	0.000491358
IFT122	127.545	7.21153	1.53804	4.6888	2.75e-06	0.000511865
ECT2	307.599	6.11253	1.30543	4.68237	2.84e-06	0.000520291
WDR47	578.946	4.60822	0.986123	4.67307	2.97e-06	0.000536439
POFUT1	459.21	4.33533	0.934869	4.63736	3.53e-06	0.000628689
BEX4	399.779	5.24262	1.13679	4.61179	3.99e-06	0.000701074
NDC1	531.478	5.06838	1.10091	4.60382	4.15e-06	0.000718207
ZNF799	90.97	10.4118	2.26385	4.59917	4.24e-06	0.000724227
ATP8B4	493.658	5.53489	1.20492	4.59358	4.36e-06	0.000733719
QPCT	143.126	9.13188	1.9954	4.57646	4.73e-06	0.000785623
EXO1	105.062	9.92261	2.1698	4.57306	4.81e-06	0.000787809
KIAA0355	425.966	-3.49744	0.766177	-4.56479	5e-06	0.00080875
ITGAD	52.295	15.9301	3.50039	4.55096	5.34e-06	0.000852566
CCDC77	305.788	4.28905	0.94364	4.54521	5.49e-06	0.000854055
ZNF77	123.659	10.0445	2.20993	4.54519	5.49e-06	0.000854055
KIF18B	78.9143	10.3067	2.28232	4.51589	6.31e-06	0.000968857
PWP2	720.667	5.16808	1.14618	4.50898	6.51e-06	0.000988586
GTPBP4	1068.84	5.03342	1.11831	4.50092	6.77e-06	0.00101431
RNF130	204.022	7.77903	1.74168	4.4664	7.95e-06	0.00116412
PERP	458.95	4.83013	1.08123	4.46726	7.92e-06	0.00116412
IGKV4.1	574.183	5.91231	1.32716	4.45487	8.39e-06	0.00121405
F5	366.776	7.14906	1.60758	4.4471	8.7e-06	0.0012441
ZNF589	158.852	-5.91006	1.33228	-4.43605	9.16e-06	0.00129466
RECQL4	150.328	6.63017	1.49709	4.4287	9.48e-06	0.0012949
RRN3	685.181	5.02757	1.13417	4.4328	9.3e-06	0.0012949
PLAUR	403.604	7.45091	1.68213	4.42944	9.45e-06	0.0012949
EIF2D	394.218	5.33667	1.20969	4.41161	1.03e-05	0.00138605
ATG4A	277.971	5.83036	1.32487	4.40068	1.08e-05	0.00144189
MTBP	91.6189	9.92635	2.2593	4.39354	1.12e-05	0.00146505
NDC80	371.065	5.21572	1.1874	4.39255	1.12e-05	0.00146505
RIPK1	761.741	4.12484	0.941813	4.37968	1.19e-05	0.00153426
CTSF	147.616	7.73335	1.76644	4.37792	1.2e-05	0.00153426
LINC00938	336.85	5.17061	1.18235	4.37317	1.22e-05	0.00155187
NCAPH	400.407	5.11987	1.17212	4.36804	1.25e-05	0.00155308
KIF23	167.658	10.1282	2.31748	4.37032	1.24e-05	0.00155308
MIEF2	137.829	7.48621	1.71452	4.36635	1.26e-05	0.00155308
LTA	407.625	5.48292	1.25874	4.35586	1.33e-05	0.00161322
AGPAT9	126.741	9.46724	2.17471	4.35332	1.34e-05	0.00161603
MPP1	288.307	5.44911	1.25374	4.3463	1.38e-05	0.00165241
MIER3	346.727	4.14363	0.959814	4.31711	1.58e-05	0.00186856
PXMP4	134.202	8.41354	1.95375	4.30635	1.66e-05	0.0019431
SPG20	147.594	9.56807	2.22615	4.29804	1.72e-05	0.00199835
SHCBP1	120.039	10.0467	2.34073	4.29213	1.77e-05	0.00203317
IL12RB2	175.544	7.94603	1.85263	4.28905	1.79e-05	0.00204248
CLCN6	139.718	6.75023	1.57708	4.28021	1.87e-05	0.00210582
SLC25A40	457.051	5.02323	1.17568	4.27263	1.93e-05	0.00215892
HCCS	344.909	3.96625	0.928986	4.26943	1.96e-05	0.00217033
CETN2	243.049	5.0624	1.18663	4.2662	1.99e-05	0.00218236
ZNF93	109.653	9.21097	2.16008	4.26417	2.01e-05	0.00218279
SLC38A7	121.392	10.2878	2.41644	4.25741	2.07e-05	0.00223005
FANCC	121.265	8.04817	1.89283	4.25193	2.12e-05	0.00226548
STK3	113.165	8.70779	2.04931	4.24914	2.15e-05	0.00227416
ZNF225	114.319	9.24425	2.18787	4.22523	2.39e-05	0.00250792
GNPDA1	526.454	4.46347	1.0576	4.22037	2.44e-05	0.00254091
AIG1	116.8	8.58933	2.04465	4.20089	2.66e-05	0.00274649
TNFRSF4	326.566	7.17917	1.71013	4.19803	2.69e-05	0.00275823
PARP2	388.35	3.29426	0.785702	4.19276	2.76e-05	0.00279982
TGFBI	391.292	5.99319	1.43286	4.18266	2.88e-05	0.0029031
ZNF549	286.748	5.45893	1.31213	4.16035	3.18e-05	0.0031758
TBX19	110.543	-8.80686	2.12022	-4.15374	3.27e-05	0.00323951
MAMLD1	103.554	-10.487	2.52569	-4.15212	3.29e-05	0.00323951
ZNF563	92.0127	8.38962	2.02215	4.14885	3.34e-05	0.00326008
SLC30A9	975.837	4.53297	1.0936	4.14499	3.4e-05	0.00328934
SV2A	120.616	8.7185	2.10438	4.14302	3.43e-05	0.00329179
ZNF3	556.712	5.0918	1.23365	4.12742	3.67e-05	0.00349079
GINS1	128.084	7.95085	1.92702	4.12598	3.69e-05	0.00349079
ZNF546	93.7182	8.97524	2.18188	4.11354	3.9e-05	0.00365632
TRIP13	103.778	8.37152	2.04047	4.10274	4.08e-05	0.00380228
VIPAS39	394.853	4.66138	1.13709	4.09939	4.14e-05	0.00382882
AACS	188.804	-6.1648	1.50493	-4.0964	4.2e-05	0.00384954
SERAC1	143.321	9.79022	2.39465	4.08837	4.34e-05	0.00395575
SLC22A5	97.6262	7.38069	1.8068	4.08495	4.41e-05	0.00396155
WDR62	91.0836	9.90826	2.42575	4.08462	4.41e-05	0.00396155
STK11IP	384.988	4.81651	1.18576	4.06195	4.87e-05	0.00433498
TRIAP1	471.767	4.75176	1.1705	4.05959	4.92e-05	0.00434755
ARFIP1	427.06	5.45093	1.34599	4.04975	5.13e-05	0.00450202
IL1B	1055.38	5.42465	1.34493	4.03341	5.5e-05	0.00476421
STYK1	238.728	7.19838	1.7848	4.03316	5.5e-05	0.00476421
RNF146	398.697	4.64812	1.15705	4.01722	5.89e-05	0.00502975
ZNF624	120.046	7.95405	1.98041	4.01637	5.91e-05	0.00502975
ZBTB32	338.58	5.56892	1.38687	4.01547	5.93e-05	0.00502975
SHQ1	533.823	4.89192	1.22331	3.99893	6.36e-05	0.00532117
CCL4	16382.5	1.35607	0.339007	4.00012	6.33e-05	0.00532117
CENPN	154.952	5.36675	1.34489	3.99048	6.59e-05	0.005477
DHRS7B	217.894	5.08216	1.27525	3.98524	6.74e-05	0.00556175
MCTP2	503.979	5.19421	1.30484	3.98073	6.87e-05	0.00563044
KPTN	93.1825	9.48488	2.39441	3.96126	7.46e-05	0.00606949
RGS2	3552.32	2.05066	0.518269	3.95674	7.6e-05	0.00610463
KIAA1958	85.9935	8.4465	2.13403	3.95801	7.56e-05	0.00610463
ASCC1	519.583	4.01344	1.01581	3.95097	7.78e-05	0.00621325
IRF5	300.011	5.60528	1.41934	3.94923	7.84e-05	0.0062182
THAP9.AS1	413.004	5.16782	1.30969	3.94584	7.95e-05	0.00626632
FNDC3B	376.409	5.31052	1.34728	3.94167	8.09e-05	0.00633572
OSBPL9	1163.79	2.25397	0.574018	3.92665	8.61e-05	0.00670177
SLC17A5	495.241	4.95603	1.26439	3.91971	8.87e-05	0.00685432
CAPG	3382.2	1.29437	0.330836	3.91242	9.14e-05	0.00702066
EVC2	304.83	-4.98598	1.27496	-3.91069	9.2e-05	0.00702701
KIAA1407	73.7029	8.63185	2.21748	3.89264	9.92e-05	0.00752433
ENOX2	302.199	5.22426	1.34535	3.88318	0.000103097	0.0077753
IGHV4.39	80.1183	8.12645	2.09415	3.88055	0.000104221	0.00779482
RNF111	768.38	2.32389	0.599	3.87961	0.000104624	0.00779482
MALAT1	281301	-0.902557	0.233199	-3.87033	0.00010869	0.00804893
WDR65	63.7931	-10.4036	2.70045	-3.85254	0.000116897	0.00850305
FAM131A	107.712	7.98067	2.07123	3.85311	0.000116627	0.00850305
IGHG2	254.812	5.98303	1.55192	3.85524	0.000115618	0.00850305
ZNF501	93.9988	9.77432	2.53962	3.84873	0.000118729	0.00858553
NSMAF	1450.74	1.94345	0.505164	3.84718	0.000119486	0.00858973
JARID2	614.887	4.06863	1.05836	3.84428	0.000120905	0.0086412
C17orf58	94.2316	9.86263	2.56771	3.84102	0.000122525	0.00870637
PIGB	343.438	3.60504	0.940232	3.83421	0.000125971	0.00889977
ZNF724P	86.0953	8.11543	2.11767	3.83225	0.000126978	0.00891965
TBPL1	503.469	4.46207	1.17051	3.81207	0.000137805	0.00957084
KAT8	492.604	4.3898	1.15153	3.81215	0.000137763	0.00957084
IGHV3.23	193.608	7.18129	1.88609	3.8075	0.000140378	0.00969475
TARBP2	289.907	5.21738	1.37373	3.79796	0.000145891	0.0100192
ZNF443	67.3271	8.74851	2.30539	3.79481	0.000147758	0.0100911
CCR8	227.978	-6.9817	1.84176	-3.79077	0.000150178	0.0101997
GPATCH4	463.365	3.7698	0.995222	3.7879	0.000151928	0.0102619
NPC2	366.545	3.11014	0.823315	3.77758	0.000158359	0.0105799
PLD2	234.946	-4.00105	1.05905	-3.77796	0.000158116	0.0105799
LPAL2	57.4419	9.12957	2.41764	3.77623	0.000159222	0.0105801
FANCG	336.886	4.63881	1.22898	3.77451	0.000160324	0.0105921
APOBEC3G	11055	0.968481	0.256669	3.77326	0.000161126	0.0105921
FBXL4	440.668	4.99194	1.32446	3.76905	0.000163869	0.0107151
SPAG16	274.213	4.75605	1.26348	3.76424	0.000167055	0.0108657
S100A8	422.211	5.51784	1.46645	3.76272	0.000168074	0.0108691
AGPAT2	717.865	4.10737	1.09194	3.76153	0.000168876	0.0108691
RBMXL1	222.195	3.87644	1.03099	3.75993	0.000169964	0.0108821
IGLV1.47	61.1372	10.4425	2.77941	3.75709	0.000171898	0.010949
FN1	361.829	6.86927	1.83447	3.74454	0.000180724	0.0114218
GGACT	76.6643	8.45106	2.25728	3.74391	0.00018118	0.0114218
SPICE1	354.884	-4.52561	1.20952	-3.74165	0.000182814	0.011466
NET1	129.94	8.70143	2.32868	3.73664	0.000186497	0.0116376
SLC25A29	83.6834	8.18597	2.19301	3.73276	0.000189392	0.0117586
CTPS2	160.933	7.93638	2.13388	3.71922	0.000199841	0.012345
LIN9	221.459	5.64716	1.5198	3.71573	0.00020262	0.0123534
MAP3K8	812.563	2.10464	0.566604	3.71448	0.000203622	0.0123534
CYP2R1	316.007	4.01898	1.08211	3.71401	0.000203997	0.0123534
MGME1	439.119	4.35919	1.17344	3.71488	0.000203304	0.0123534
ZNF75A	425.79	4.71245	1.26935	3.71251	0.000205216	0.0123663
COPZ2	59.0377	9.73982	2.62558	3.70959	0.000207598	0.0124488
SOS2	230.908	5.43152	1.46603	3.70492	0.00021146	0.0126188
PKN3	82.4684	-7.68646	2.0766	-3.70146	0.000214362	0.012669
WDR4	90.739	8.61247	2.3263	3.70221	0.000213729	0.012669
SERPINB6	390.436	4.21509	1.14137	3.693	0.000221624	0.0130355
VPRBP	911.001	3.63088	0.984245	3.689	0.000225135	0.0130546
EXOSC9	817.172	2.31722	0.628004	3.68982	0.000224414	0.0130546
LGALS1	1829.62	1.54978	0.420104	3.68903	0.000225111	0.0130546
IFT81	72.3494	8.92406	2.42301	3.68305	0.000230457	0.0133005
TMCC3	84.6288	8.16291	2.22574	3.6675	0.000244937	0.0140701
PIP5K1A	419.028	5.03445	1.37402	3.66402	0.000248283	0.0140762
PSEN2	139.607	6.04514	1.64995	3.66382	0.000248477	0.0140762
FIG4	431.632	4.89722	1.33602	3.66553	0.000246826	0.0140762
CYBB	172.032	7.50021	2.04926	3.65996	0.000252255	0.0142247
CGRRF1	337.483	5.05109	1.38086	3.65793	0.000254262	0.0142723
FOXRED1	250.812	5.00677	1.37085	3.65231	0.000259892	0.0145221
B3GNT9	88.8191	8.43324	2.3109	3.64933	0.000262929	0.0146253
WARS2	211.085	5.35153	1.46783	3.64589	0.000266473	0.0147556
C15orf39	184.775	5.42522	1.491	3.63864	0.000274081	0.0151089
PHLDB2	142.757	5.78125	1.59115	3.63338	0.000279734	0.0153516
PUS1	115.754	5.5368	1.52444	3.63202	0.000281207	0.0153639
ENDOV	107.157	5.47734	1.50863	3.63067	0.000282689	0.0153765
RILP	61.5748	8.56622	2.36153	3.6274	0.000286295	0.0155041
C16orf80	737.277	2.71667	0.749473	3.62478	0.00028921	0.0155932
AP5S1	145.564	5.91449	1.63224	3.62354	0.000290595	0.0155995
WDSUB1	330.68	4.79792	1.325	3.62106	0.000293402	0.0156817
SKA1	93.7869	9.05051	2.50038	3.61965	0.000294998	0.0156987
BAG3	321.551	4.99669	1.38276	3.61357	0.000302007	0.0160025
TMEM117	152.076	-5.37957	1.49008	-3.61027	0.000305882	0.0161382
FAM227B	106.105	5.43885	1.51042	3.60088	0.000317147	0.0166611
P4HA2	96.3529	8.80622	2.44636	3.59973	0.000318546	0.0166634
UBE4B	316.487	-3.48129	0.969604	-3.59042	0.000330142	0.0171968
PIF1	134.054	8.64653	2.41025	3.58739	0.000334002	0.0173244
CDK1	515.168	4.34945	1.21614	3.57643	0.00034832	0.0179912
ATF3	167.524	6.37128	1.78472	3.56991	0.000357107	0.0183239
CCNB2	290.364	5.04141	1.41238	3.56944	0.000357744	0.0183239
WFS1	73.6423	9.34993	2.62129	3.56692	0.000361204	0.0184244
CASC3	1238.67	3.89543	1.09479	3.55814	0.000373485	0.0189721
DHFRL1	178.367	6.06055	1.70547	3.55359	0.000380018	0.0192245
TMEM206	424.583	4.65598	1.31064	3.55244	0.000381675	0.0192292
ANKRD42	95.9875	6.38479	1.79952	3.54805	0.000388095	0.0193937
ANKFY1	593.178	4.64479	1.30874	3.54905	0.000386623	0.0193937
ZNF222	79.7397	7.55422	2.1315	3.54409	0.000393977	0.0196079
CTNND1	48.5213	9.01053	2.5447	3.54089	0.000398773	0.0197666
KLHL17	68.7516	7.04851	1.993	3.53664	0.000405252	0.0200071
RTN4IP1	114.639	-5.96792	1.68976	-3.53182	0.000412703	0.0201324
IL4I1	104.608	9.1015	2.57622	3.53288	0.000411055	0.0201324
SLC25A43	463.241	-3.68929	1.04433	-3.5327	0.000411333	0.0201324
TXLNG	387.651	4.72459	1.33813	3.53075	0.000414391	0.0201348
GCC1	461.727	4.58544	1.30127	3.52383	0.000425356	0.0205862
MIR17HG	64.4672	8.80718	2.50138	3.52093	0.000430034	0.020731
ARHGAP12	562.802	3.80313	1.08077	3.51891	0.00043332	0.0208
ABHD2	734.978	3.37681	0.959872	3.51798	0.000434848	0.0208
ENO1	10955.9	1.23515	0.351784	3.5111	0.000446253	0.0210184
HAUS3	931.607	3.64442	1.03743	3.51292	0.000443214	0.0210184
HOOK2	94.0226	6.30268	1.79471	3.51182	0.000445053	0.0210184
MCM3AP.AS1	55.4657	-8.83957	2.51681	-3.51222	0.000444385	0.0210184
ARHGAP19	340.358	3.94922	1.12512	3.51006	0.000448006	0.0210204
UBR1	537.215	2.68792	0.766466	3.5069	0.00045336	0.0211104
TBC1D16	58.702	-9.86388	2.81256	-3.50708	0.000453058	0.0211104
CPQ	302.699	4.32671	1.23519	3.50287	0.000460268	0.0211248
TMED8	373.717	4.53465	1.29434	3.50344	0.000459287	0.0211248
CD300A	562.646	4.74157	1.35312	3.50417	0.000458027	0.0211248
NKG7	17883.1	0.825079	0.235554	3.50271	0.000460543	0.0211248
RP11.395B7.7	198.854	-3.94947	1.12794	-3.50147	0.000462694	0.0211446
PRC1	451.419	4.44629	1.27026	3.5003	0.000464729	0.0211589
LRRC28	404.29	4.6829	1.33841	3.49886	0.000467251	0.0211953
MTFR2	82.3191	9.11423	2.60834	3.49426	0.000475376	0.0214845
GNE	84.0797	8.21109	2.35477	3.48701	0.000488457	0.0219949
ABCE1	750.035	2.25065	0.64591	3.48446	0.000493129	0.0220438
RFC5	353.5	4.79238	1.37513	3.48504	0.000492071	0.0220438
RMDN2	63.5705	9.0343	2.5937	3.48318	0.000495504	0.0220697
PLD1	94.5552	7.77055	2.23266	3.48039	0.000500675	0.0221016
COL4A3BP	851.983	3.55123	1.02134	3.47703	0.000507008	0.0221016
CD14	202.834	7.45073	2.14097	3.48008	0.000501267	0.0221016
TRIB1	654.193	4.2931	1.23448	3.47765	0.000505839	0.0221016
SLC36A4	210.088	-5.12657	1.47405	-3.47788	0.000505404	0.0221016
FANCB	56.9476	9.65537	2.77621	3.4779	0.000505366	0.0221016
TRAV19	236.873	4.73699	1.36306	3.47527	0.000510336	0.0221681
MVB12A	178.675	4.95813	1.42785	3.47245	0.000515726	0.0223233
TMEM254	359.443	4.59876	1.3248	3.47129	0.000517967	0.0223417
ZNF232	100.428	8.43913	2.43347	3.46795	0.000524451	0.0225422
TAB2	509.125	4.09959	1.18277	3.46608	0.000528102	0.02262
SYK	78.64	9.06937	2.61766	3.46468	0.000530856	0.0226591
ALDH1B1	160.045	5.41688	1.56468	3.46196	0.000536255	0.022688
C15orf48	79.5456	8.36313	2.4152	3.46271	0.000534774	0.022688
TENM1	279.819	-3.50313	1.01201	-3.46155	0.00053707	0.022688
KDM3A	608.613	4.01265	1.15996	3.45929	0.000541602	0.0228011
ODC1	2869.43	1.37446	0.3979	3.45427	0.000551785	0.0231505
POC5	376.078	4.42335	1.28163	3.45134	0.000557804	0.0233234
CD160	181.676	7.1445	2.07126	3.44935	0.000561948	0.023417
DIAPH3	62.1494	8.36394	2.42677	3.44653	0.000567834	0.0235824
GPRIN1	65.0656	9.26705	2.68958	3.44554	0.000569927	0.0235896
DBR1	411.229	4.48739	1.30335	3.44296	0.000575385	0.0236615
NFYB	933.767	2.03361	0.590669	3.4429	0.000575513	0.0236615
UMPS	479.146	4.52351	1.31435	3.44165	0.000578188	0.0236922
POLR1B	518.032	4.17491	1.21369	3.43986	0.000582025	0.0237389
SLC27A2	1053.7	1.82362	0.530229	3.43931	0.00058319	0.0237389
PLK1S1	296.236	5.16824	1.50363	3.43718	0.000587802	0.0238085
TMEM187	188.15	5.16975	1.50426	3.43673	0.000588774	0.0238085
BCL9	128.829	8.38443	2.44219	3.43317	0.000596572	0.0240448
FANCE	59.3526	9.43443	2.75146	3.42888	0.000606086	0.0243484
FBXO5	361.282	4.60835	1.34754	3.41982	0.000626624	0.0250915
TRAM2	48.8866	8.80294	2.57544	3.41804	0.000630746	0.0251746
SNX25	62.7264	8.04491	2.35616	3.41441	0.000639196	0.0252991
PON2	463.6	4.52587	1.32566	3.41405	0.000640041	0.0252991
ZBTB42	58.6987	9.18985	2.69039	3.4158	0.000635949	0.0252991
IFI27	539.964	3.46239	1.0147	3.41223	0.000644329	0.025387
FH	410.886	4.43526	1.30224	3.40587	0.000659543	0.0256715
GTPBP8	364.715	3.6768	1.0796	3.40572	0.000659904	0.0256715
GOT1	394.113	4.13628	1.21386	3.40753	0.000655541	0.0256715
CHD9	1677.46	-1.61977	0.475449	-3.40682	0.000657246	0.0256715
TRMT1L	519.708	2.7448	0.806301	3.40419	0.000663604	0.025734
RP11.1277A3.2	57.8063	8.43336	2.4785	3.40261	0.000667459	0.0258021
IGLV3.21	160.466	7.24484	2.12979	3.40168	0.000669741	0.0258092
SMG5	1302.55	2.7921	0.821112	3.40039	0.000672894	0.0258496
GEM	374.538	4.8823	1.43663	3.39844	0.000677704	0.0259533
ADC	241.132	-4.92425	1.45031	-3.3953	0.000685542	0.0261419
RAB11FIP5	97.2233	7.45401	2.19574	3.39476	0.000686881	0.0261419
IRF8	226.379	5.09993	1.50293	3.39332	0.000690504	0.0261987
TIMM21	550.945	2.32395	0.685113	3.39207	0.000693662	0.0262375
WDR89	409.578	4.34279	1.2807	3.39094	0.000696536	0.0262654
STS	73.9372	8.28468	2.44781	3.38453	0.000713008	0.0268043
NAA15	1036.48	3.36417	0.994565	3.38255	0.000718159	0.0269156
CXCR1	82.386	8.05153	2.38474	3.37627	0.000734763	0.0270282
ITPR1	793.815	1.97342	0.584404	3.37681	0.000733307	0.0270282
BAHD1	78.154	6.71968	1.98794	3.38022	0.000724275	0.0270282
SLCO3A1	160.878	-4.95521	1.46618	-3.37968	0.000725713	0.0270282
TAF4B	82.8548	7.87391	2.33073	3.3783	0.000729348	0.0270282
E2F1	97.8326	8.27386	2.44935	3.37798	0.000730195	0.0270282
PGK1	10981.8	0.884516	0.262032	3.3756	0.000736554	0.0270282
ADPRM	254.716	4.31914	1.28191	3.36931	0.000753565	0.0275701
SFXN4	250.139	5.0413	1.49661	3.36849	0.000755821	0.0275706
AATF	1600.89	1.71514	0.509539	3.36606	0.00076249	0.0276498
ARMCX6	143.136	5.20537	1.54613	3.3667	0.000760736	0.0276498
HSP90AB1	8259.41	1.25844	0.374334	3.36181	0.00077434	0.0279969
POLR3A	485.262	4.02222	1.19752	3.35878	0.000782868	0.0282223
ZNF331	1135.33	2.74874	0.820744	3.34908	0.000810798	0.0291437
ZNF792	429.097	4.55135	1.35933	3.34824	0.000813255	0.0291468
IGKV1.5	525.82	5.8286	1.74246	3.34503	0.000822736	0.0292861
TXK	599.457	2.31704	0.692546	3.34568	0.000820813	0.0292861
KMT2E	4446.28	-1.10098	0.329191	-3.34451	0.000824288	0.0292861
KIF14	116.565	5.96844	1.7859	3.34198	0.000831819	0.0294291
SGTB	410.74	3.88897	1.1641	3.34076	0.000835496	0.0294291
NIPAL2	125.607	6.85454	2.05169	3.34093	0.000834993	0.0294291
RTKN2	342.328	4.28077	1.28195	3.33927	0.000839999	0.0294614
TAOK3	1495.31	2.13695	0.640024	3.33887	0.000841207	0.0294614
VPS13B	1629.19	-1.60775	0.482464	-3.33237	0.000861102	0.0300725
DOPEY1	307.506	4.23455	1.27199	3.32908	0.000871349	0.0303442
CREG1	442.547	4.19302	1.26216	3.32209	0.00089346	0.0310263
TRAF3	683.552	3.09158	0.931529	3.31883	0.000903959	0.0313024
SWAP70	85.0457	7.37424	2.22369	3.31621	0.000912465	0.03142
SPATA33	75.9148	6.63807	2.00166	3.31629	0.000912213	0.03142
PRMT6	421.489	4.43716	1.33871	3.3145	0.00091806	0.0315243
ZDHHC9	71.4999	8.77275	2.6481	3.31284	0.000923528	0.0316238
NUDT15	108.688	5.01366	1.51537	3.30853	0.000937871	0.0320257
DISC1	99.8484	6.35399	1.92266	3.30478	0.000950493	0.0322774
CCDC88A	299.499	-4.02213	1.21688	-3.30529	0.000948782	0.0322774
MS4A6A	197.416	7.23776	2.1929	3.30055	0.00096497	0.0326787
NUP214	470.634	3.86357	1.17094	3.29956	0.000968374	0.0327039
HPGD	447.503	3.915	1.18747	3.29693	0.000977468	0.0329206
C16orf87	301.182	4.54855	1.38012	3.29576	0.000981568	0.0329684
ARRB1	73.9124	7.12442	2.16369	3.29271	0.00099226	0.0332367
HECTD3	1439.99	-1.56424	0.475325	-3.29088	0.000998744	0.033277
FCER1G	271.082	5.45188	1.65668	3.29084	0.000998878	0.033277
BST2	2345.98	1.24648	0.379083	3.28814	0.00100851	0.0335072
ZNF773	114.404	5.03238	1.53104	3.2869	0.00101297	0.0335647
ANKRD26	326.861	4.34497	1.32223	3.28609	0.00101587	0.0335703
NPHP4	70.0713	9.33378	2.84555	3.28013	0.00103758	0.0341956
PRIM2	291.413	4.4628	1.36089	3.27934	0.00104051	0.0342006
FBXO33	344.466	5.69701	1.74445	3.26579	0.00109161	0.0357843
BACH2	108.768	-5.38003	1.64787	-3.26485	0.00109524	0.0358078
SLC43A1	485.731	4.01456	1.2301	3.2636	0.00110008	0.0358708
ZMYM1	291.248	4.2528	1.30458	3.25991	0.00111449	0.0359238
RORC	145.221	6.05677	1.86026	3.25587	0.00113047	0.0359238
RHOB	170.544	4.53389	1.39055	3.2605	0.00111217	0.0359238
INPP4B	2031.62	-1.54749	0.474867	-3.25879	0.00111888	0.0359238
QRSL1	462.659	3.71496	1.13884	3.26204	0.00110613	0.0359238
AK9	197.238	4.90513	1.50616	3.25672	0.00112707	0.0359238
EPDR1	59.8401	10.2324	3.14289	3.25574	0.00113099	0.0359238
HECTD4	286.674	3.85835	1.18406	3.25857	0.00111976	0.0359238
ZC3H13	1930.16	-1.36951	0.419905	-3.26148	0.00110834	0.0359238
ENOSF1	467.552	-2.51379	0.772282	-3.25502	0.00113385	0.0359238
RRAS	74.3313	6.6743	2.05019	3.25546	0.0011321	0.0359238
GSTZ1	76.8461	6.74361	2.07363	3.25208	0.00114563	0.0360184
TMPRSS3	180.785	5.11614	1.57319	3.25208	0.00114562	0.0360184
APOOL	47.9536	8.57266	2.63583	3.25236	0.00114452	0.0360184
ZNF14	353.914	4.17318	1.28459	3.24865	0.00115956	0.0363635
SCYL2	919.548	1.84609	0.568479	3.24742	0.00116458	0.036428
LAG3	7669.72	0.976867	0.301083	3.24451	0.00117651	0.0366148
ARL4D	55.8387	8.72369	2.68839	3.24495	0.00117473	0.0366148
NQO2	278.958	4.27964	1.31934	3.24376	0.00117961	0.0366186
RAI1	68.9874	7.45219	2.2989	3.24163	0.00118848	0.0368009
SLC35D1	735.66	2.86212	0.883304	3.24024	0.00119427	0.036876
RP11.214O1.2	59.5491	7.7416	2.38967	3.23962	0.0011969	0.036876
AKAP9	3134.26	-1.2081	0.373393	-3.23546	0.00121445	0.037323
SEPHS2	1141.99	2.88375	0.891499	3.23472	0.00121761	0.0373268
TMEM155	57.0631	9.64675	2.98375	3.23309	0.00122458	0.0373581
ZNF416	161.853	5.26181	1.6275	3.23306	0.00122471	0.0373581
HMGB2	3533.15	1.17307	0.36337	3.2283	0.0012453	0.0378923
LGALS3BP	422.12	4.22058	1.30878	3.22482	0.0012605	0.0382602
SRGN	11913.2	0.831508	0.258191	3.22052	0.00127959	0.0387439
SLC9A1	393.652	3.28412	1.02204	3.2133	0.00131217	0.0395954
RASD1	87.6656	8.20725	2.55449	3.21287	0.00131416	0.0395954
LYRM4	252.609	3.43785	1.0707	3.21084	0.00132347	0.0397786
IGKV3.11	200.765	5.7666	1.80118	3.20157	0.0013668	0.0409225
TMA16	257.549	4.62364	1.44432	3.20125	0.00136833	0.0409225
KRT5	86.1348	7.22451	2.25725	3.20058	0.00137152	0.0409225
TK1	484.14	2.38094	0.744556	3.1978	0.0013848	0.0412187
CMAS	751.392	1.92297	0.601484	3.19704	0.00138846	0.041228
CENPJ	304.204	-3.09439	0.968218	-3.19597	0.00139363	0.0412818
ZNF429	238.286	4.64691	1.45461	3.1946	0.00140023	0.0413776
PTDSS2	148.508	5.23112	1.63846	3.19271	0.00140946	0.0415505
ACBD6	472.026	4.24871	1.33343	3.18629	0.00144111	0.0423817
DRAM1	163.22	4.3528	1.36733	3.18343	0.0014554	0.0426999
EIF2AK1	1609.22	1.79034	0.562858	3.18079	0.00146872	0.042988
TUG1	470.715	3.8175	1.20166	3.17686	0.00148881	0.0434725
ZFP28	109.176	6.82516	2.14911	3.1758	0.00149422	0.043527
CCNL2	2884.96	-1.10697	0.348796	-3.17369	0.00150515	0.0437419
ZNF343	232.443	3.36412	1.06095	3.17086	0.00151986	0.0440652
CD86	321.102	5.36472	1.69279	3.16915	0.00152884	0.0441798
GPATCH1	288.252	4.30349	1.3584	3.16806	0.00153459	0.0441798
TPX2	563.338	5.01405	1.58242	3.1686	0.00153173	0.0441798
PHF21A	530.857	-2.60162	0.821463	-3.16706	0.0015399	0.0442289
CCR7	5645.03	-1.42554	0.4503	-3.16576	0.00154678	0.0443231
AMD1	1084.56	1.84979	0.585529	3.15917	0.0015822	0.0451517
RP11.4F5.2	55.6151	9.57694	3.03162	3.15901	0.00158305	0.0451517
CPOX	286.125	4.37259	1.38471	3.15776	0.00158984	0.0451544
FBXL20	158.681	4.87709	1.54453	3.15765	0.00159049	0.0451544
PLEKHG1	185.473	-4.7078	1.49273	-3.15382	0.00161148	0.045645
SAP130	610.373	3.60053	1.14223	3.15221	0.00162042	0.0457302
IGLV3.25	200.572	5.46719	1.73455	3.15193	0.00162193	0.0457302
HMCES	864.268	3.54792	1.12687	3.14848	0.00164121	0.046168
LHX4	78.8342	-6.19659	1.97116	-3.14363	0.00166866	0.0466201
FAM111B	149.13	5.36731	1.70716	3.14401	0.00166653	0.0466201
FOS	25006.6	0.921698	0.293074	3.14493	0.00166128	0.0466201
SMAD5	528.156	3.93975	1.25487	3.13957	0.00169198	0.0468457
HDAC9	175.147	4.76751	1.51837	3.1399	0.00169008	0.0468457
MIR22HG	127.966	5.13746	1.63634	3.13961	0.00169174	0.0468457
TMX4	2622.55	-1.15172	0.366658	-3.14114	0.00168291	0.0468457
KAT2B	451.841	3.25341	1.03722	3.13666	0.00170885	0.0471008
PBK	90.4093	7.95493	2.53559	3.13731	0.00170506	0.0471008
SLC48A1	214.168	4.54783	1.4508	3.13469	0.00172035	0.0473114
CSPP1	229.865	3.9982	1.27697	3.131	0.00174212	0.0478034
HSPA6	226.806	6.03879	1.92945	3.1298	0.00174927	0.0478926
PCM1	2439.11	1.27291	0.406827	3.12888	0.00175474	0.0479357
CMSS1	262.704	3.19647	1.02201	3.12764	0.00176216	0.0480317
TRAF3IP2.AS1	45.6211	8.35009	2.67585	3.12054	0.00180522	0.0489881
CLU	350.46	4.37165	1.40065	3.12116	0.00180141	0.0489881
CCR2	512.072	2.60102	0.834044	3.11857	0.00181733	0.0492081
C16orf70	301.389	3.83316	1.23117	3.11341	0.00184937	0.0499654

## Sheet: BulkRNA_Placebo prevspost_DEG_3
Genes	baseMean	log2FoldChange	lfcSE	stat	pvalue	padj
RP11-56L13.1	38.6672	-1.32421	0.281906	-4.69736	2.63541e-06	0.0712818
SPP1	3297.57	1.26531	0.282982	4.47136	7.77253e-06	0.0712818
XK	110.286	-0.988746	0.220395	-4.48625	7.24862e-06	0.0712818

## Sheet: CD8A expression across cohorts
Samples ID	Treatment Cases	CD8A TPM	log(CD8A TPM+1)
AMG-242100	Placebo	0.199992	0.0791784
AMG-243300	PI3kdi	0.750356	0.243126
AMG-241000	PI3kdi	0.988049	0.298427
SOTON04_BC_4	HNSCC	1.1787	0.338197
SOTON02_BC18	HNSCC	1.30184	0.362074
AMG-243200	PI3kdi	1.6741	0.427177
SOTON04_BC_10	HNSCC	1.78144	0.444269
AMG-241600	Placebo	1.80425	0.447817
AMG-240500	PI3kdi	1.89188	0.461181
AMG-241800	PI3kdi	2.33642	0.523281
AMG-240100	Placebo	2.39387	0.530696
SOTON03_14_BC	HNSCC	2.72633	0.571281
AMG-242700	PI3kdi	2.9985	0.601897
AMG-242000	PI3kdi	3.03749	0.606111
AMG-241500	PI3kdi	3.08806	0.611517
AMG-243000	PI3kdi	4.40531	0.73282
SOTON03_10_BC	HNSCC	4.77477	0.761535
SOTON03_13_BC	HNSCC	4.97301	0.776194
SOTON03_BC_16	HNSCC	5.06964	0.783163
SOTON04_BC_11	HNSCC	5.15036	0.7889
Library12	HNSCC	5.59958	0.819516
SOTON02_BC12	HNSCC	5.59958	0.819516
AMG-240200	PI3kdi	5.92159	0.840206
SOTON03_2_BC	HNSCC	6.19981	0.857321
SOTON03_12_BC	HNSCC	6.57288	0.879261
AMG-241300	PI3kdi	6.67981	0.88535
AMG-241100	Placebo	6.68422	0.8856
SOTON03_BC_22	HNSCC	7.02634	0.904518
SOTON03_8_BC	HNSCC	7.95968	0.952292
SOTON03_18_BC	HNSCC	8.09874	0.958981
SOTON04_BC_9	HNSCC	8.36463	0.971491
SOTON03_BC_20	HNSCC	8.81914	0.992073
SOTON03_16_BC	HNSCC	9.15952	1.00687
SOTON03_9_BC	HNSCC	9.63003	1.02653
SOTON03_15_BC	HNSCC	9.75755	1.03171
SOTON03_BC_19	HNSCC	10.7065	1.06843
AMG-242800	Placebo	11.6234	1.10118
AMG-243400	PI3kdi	11.8074	1.10746
AMG-243500	PI3kdi	12.4199	1.12775
SOTON04_BC_8	HNSCC	12.6432	1.13491
SOTON02_BC4	HNSCC	13.1706	1.15139
AMG-241900	Placebo	13.3862	1.15795
SOTON04_BC_5	HNSCC	13.5758	1.16363
SOTON02_BC5	HNSCC	13.9645	1.17506
SOTON03_17_BC	HNSCC	14.8266	1.19939
SOTON03_BC_14	HNSCC	15.6814	1.22223
SOTON04_BC_7	HNSCC	15.7402	1.22376
SOTON03_11_BC	HNSCC	16.0929	1.23282
SOTON04_BC_6	HNSCC	16.2854	1.23768
SOTON02_BC16	HNSCC	17.1274	1.25833
SOTON03_BC_21	HNSCC	17.5153	1.26753
SOTON03_5_BC	HNSCC	22.4897	1.37088
SOTON03_1_BC	HNSCC	24.0201	1.39829
SOTON02_BC13	HNSCC	24.4224	1.40522
AMG-242500	Placebo	25.3494	1.42077
SOTON04_BC_1	HNSCC	26.3244	1.43655
SOTON04_BC_2	HNSCC	27.4049	1.45339
SOTON04_BC_3	HNSCC	27.7461	1.45858
SOTON02_BC14	HNSCC	27.7613	1.45881
AMG-241700	PI3kdi	28.8672	1.47519
AMG-240400	Placebo	36.6597	1.57588
SOTON02_BC6	HNSCC	37.4721	1.58515
SOTON02_BC19	HNSCC	39.9481	1.61223
SOTON03_4_BC	HNSCC	40.6992	1.62013
SOTON03_7_BC	HNSCC	54.3902	1.74343
SOTON02_BC7	HNSCC	72.8766	1.86851
SOTON03_6_BC	HNSCC	92.974	1.97301
SOTON02_BC15	HNSCC	219.623	2.34365
SOTON03_3_BC	HNSCC	224.974	2.35406
