# Supplementary material for: Immunomodulatory effects of PI3Kδ inhibition in solid tumors – evaluation in a randomized phase II trial
Source: Research Square preprint supplement (doi:10.21203/rs.3.rs-337290/v1), 2021-03-19
Supplement: Supplementary file 5 [file b15e8e59782a424a6702f471.xlsx]

## Sheet: Murine Treg.
Differential gene expression analysis. Murine Treg.
	Significance						Mean expression (CPM)										Fraction of expressing cells (CPM > 0)
Gene	Cluster	Log Fold Change	P-value	Adjusted P-value	Cluster %	Rest of cells %	Cluster 0	Cluster 1	Cluster 2	Cluster 3	Cluster 4	Cluster 5	Cluster 6	Cluster 7	Cluster 8	Cluster 9	Cluster 0	Cluster 1	Cluster 2	Cluster 3	Cluster 4	Cluster 5	Cluster 6	Cluster 7	Cluster 8	Cluster 9
Cd83	0	1.65	0	0	0.77	0.26	1690.3	12.46	278.15	118.67	425.64	634.71	30.06	58.25	417.45	809.5	76.8	3.92	28.5	24.62	41.5	59.59	7.75	4.55	41.28	51.9
Areg	0	1.53	0	0	0.86	0.27	2377.31	2.72	468.06	62.41	379.3	1342.78	235.28	19.83	2314.29	801.9	86.49	1.13	37.73	11.84	32.18	64.22	21.84	1.95	76.74	41.14
Il1rl1	0	1.52	0	0	0.7	0.1	629.17	2.83	32.12	40.2	41.13	91.94	23.42	34.66	489.99	176.9	70.39	0.75	5.91	11.51	8.78	17.69	4.91	2.6	50.87	22.15
Nr4a1	0	1.36	0	0	0.88	0.36	1514.11	58.23	439.39	109.71	291.4	341.57	283.78	76.15	1868.02	568	87.88	12.97	54.49	15.74	42.41	60.95	42.56	4.76	85.47	48.73
Gata3	0	1.29	0	0	0.85	0.33	915.03	62.37	139.27	227.93	154.36	159.52	155.03	91.93	863.17	248.13	84.75	21.49	24.13	46.95	29.8	39.05	40.35	8.66	84.01	30.38
Rel	0	1.27	0	0	0.87	0.4	1203.11	64	327.03	95.36	326.76	626.88	129.86	66.48	843.22	525.27	86.64	21.72	47.85	26.31	50.55	74.01	36.23	6.93	72.97	56.33
H2afz	0	1.25	0	0	0.98	0.82	4928.98	492.4	1242.6	1165.42	1555.26	1860.14	959.65	787.93	5080.02	1540.44	97.86	74.81	84.37	85.45	87.39	94.69	82.75	38.31	97.38	75.32
Rora	0	1.24	0	0	0.98	0.52	1930.93	20.12	770.15	166.21	616.04	1079.81	299.67	78.89	1515.63	570.04	97.86	6.56	76.92	39.68	63.44	92.11	61.71	8.44	93.31	54.43
Ramp3	0	1.23	0	0	0.81	0.29	1164.3	2.81	513.07	12.79	620.1	470.46	50.97	4.1	460.38	416.7	80.87	1.13	51.34	4.65	57.13	60.95	10.6	0.43	56.4	36.08
Fam46a	0	1.2	0	0	0.82	0.33	1200.52	26.11	419.14	48.3	285.4	855.34	172.98	31.29	969.65	453.15	81.82	7.84	44.37	14.38	37.39	72.79	36.87	2.6	84.88	39.24
Tnfrsf9	0	1.17	0	0	0.95	0.51	2598.3	36.16	834.08	210.27	594.62	1839.14	1230.09	73.27	2960.92	975.05	94.88	9.95	71.01	29.19	56.76	94.01	83.39	6.49	97.38	58.23
Epas1	0	1.14	0	0	0.47	0.08	324.29	3.97	36.04	2.45	54.85	93.58	11.9	6.18	149.79	78.32	47.34	0.68	7.85	0.93	10.42	21.9	4.27	0.87	30.23	10.76
Kdm6b	0	1.12	0	0	0.84	0.35	769.01	48.12	293.45	58.6	256.5	285.54	71.64	38.02	588.4	387.5	83.56	17.27	50.04	17.01	44.52	62.31	25	3.25	69.48	50.63
Dgat2	0	1.09	0	0	0.41	0.03	230.64	1.42	9.96	2.11	20.78	22.74	3.03	0.31	58.1	34.94	40.98	0.53	2.67	0.59	4.66	8.16	1.42	0.22	13.95	5.06
Jak2	0	1.05	0	0	0.89	0.47	976.07	61.14	421.96	106.26	352.09	522.94	84.18	70.33	961.24	375.51	88.62	21.72	65.67	35.62	58.87	81.77	28.96	8.66	89.24	50
Gadd45b	0	1.04	0	0	0.91	0.49	2000.75	23.11	1124.73	88.3	768.72	1240.54	651.55	32.72	2144.93	1191.23	91.31	7.84	75.38	20.47	67.55	89.39	67.72	3.68	87.79	65.82
Nfkbia	0	1.01	0	0	1	0.78	5038.65	381.79	2530.35	770.22	2321.57	2141.68	2977.91	369.3	4898.2	2344.51	99.5	60.94	89.55	70.98	89.4	94.29	90.98	22.94	96.51	80.38
Kdm2b	0	1	0	0	0.79	0.39	751.02	34.06	349.47	83.48	279.53	449.03	163.17	31.36	426.49	287.44	79.38	12.97	56.76	23.69	49.36	74.29	43.99	2.81	60.76	40.51
Nfkb1	0	0.99	0	0	0.9	0.57	1108.42	166.63	408.34	226.56	392.26	522.3	186.46	181.61	1219.55	404.61	90.16	49.7	62.67	54.31	62.8	75.78	52.06	16.23	88.95	55.06
Ifrd1	0	0.99	0	0	0.97	0.58	1919.61	63.17	1216.57	101.73	1052.95	1383.83	384.97	79.82	1000.56	1063.15	97.32	22.1	87.77	30.96	79.43	95.92	62.5	6.93	87.21	72.15
Tnfrsf4	0	0.98	0	0	0.98	0.7	3258.56	129.32	1339.08	656.82	1249.44	2757.68	1378.85	253.56	3236.8	1209.48	98.31	32.28	88.1	66.07	84.37	97.28	91.77	18.61	89.53	60.13
Nfkbiz	0	0.98	0	0	0.87	0.46	965.86	121.84	426.79	119.39	424.46	324.88	249.42	108.9	1008.58	483.74	86.79	32.65	57.17	30.96	58.41	59.46	45.25	7.36	86.34	50
Rgs2	0	0.97	0	0	0.83	0.4	1135.64	24.47	503.08	72.01	615.73	1028.94	289.23	47.41	562.25	540.34	83.16	7.99	51.66	18.78	59.05	83.54	54.27	3.68	51.74	47.47
Hopx	0	0.96	0	0	0.95	0.66	2841.93	160.9	1281.34	266.05	869.08	3260.11	419.28	203.97	3874.66	1148.42	94.88	44.87	78.54	55.08	72.76	96.6	76.27	16.88	94.19	58.23
Pim1	0	0.96	0	0	0.99	0.79	3467.44	440.57	2078.24	653.45	1852.12	1700.59	1111.32	459.92	2080.12	1559.34	99.01	64.93	92.96	72.34	90.68	95.92	89.87	29.87	88.95	72.15
Traf1	0	0.92	0	0	0.94	0.64	1465.62	167.48	670.74	232.11	829.88	965.42	472.25	215.05	906.88	671.77	94.29	46.08	73.85	54.82	80.35	89.93	76.74	17.97	73.84	58.23
Klrg1	0	0.91	0	0	0.66	0.18	576.15	1.47	167.96	178.52	42.71	112.86	252.42	100.86	1355.77	110.23	65.72	0.3	22.67	17.85	5.94	19.59	33.54	6.49	93.9	16.46
Bhlhe40	0	0.9	0	0	0.92	0.48	1860.72	15.14	1527.11	95.2	793.06	1365.48	983.14	71.02	841.1	975.88	92.15	2.87	84.37	19.04	61.7	90.2	77.53	5.19	63.66	55.7
Zfp36l1	0	0.9	0	0	0.97	0.81	3109.93	441.73	1939.06	968.2	1146.93	1098.25	810.68	565.8	4325.33	1248.59	96.57	72.93	92.39	85.28	84.55	89.39	82.28	37.23	97.97	66.46
Dennd4a	0	0.89	0	0	0.93	0.53	1155.29	47.84	823.92	86.89	594.17	587.37	287.36	58.45	1191.26	591.7	92.95	16.44	85.43	26.99	71.57	84.49	59.65	5.41	94.77	63.92
Tnfaip3	0	0.85	0	0	0.99	0.74	2868.15	194.53	2411.09	381.56	1920.75	1628.36	690.75	196.77	1651.92	1669.75	99.11	45.32	97.57	61.68	91.77	97.96	78.32	15.15	95.06	73.42
Tnfrsf18	0	0.8	0	0	0.95	0.72	1615.33	189.93	695.99	451.7	782	1233.45	1092.49	232.33	1516.97	589.73	95.38	50.38	78.54	71.74	78.98	95.37	93.83	19.48	91.57	55.06
Odc1	0	0.79	0	0	0.95	0.6	3889.56	39.01	4835.93	161.28	1881.35	2651.43	1422.75	130.7	1860.97	2552.52	95.18	12.9	95.38	34.01	79.52	97.28	85.44	9.74	76.16	65.82
Gpx4	0	0.8	0	0	0.91	0.73	1300.41	334.8	473.52	463.89	529.75	773.89	556.55	386.48	1237.46	586.48	90.86	73.08	68.99	76.65	67.82	86.94	85.28	30.09	92.73	63.92
Dusp10	0	0.94	0	5.40675e-308	0.73	0.31	584.25	101.33	144.89	50.06	426.12	149.13	56.17	53.8	492.51	102.68	72.93	32.65	25.59	17.68	52.1	33.06	19.94	5.63	70.35	20.25
Samsn1	0	0.72	1.50367e-293	1.97793e-289	0.91	0.56	899.93	50.72	667.8	163.9	496.73	520.9	439.68	137.87	1061.78	408.05	90.91	18.02	79.84	41.37	67.92	80.41	75.95	11.9	94.48	53.8
Crem	0	0.7	3.19738e-292	4.20584e-288	0.87	0.46	813.86	18.22	731.23	34.21	525.02	720.82	201.86	23.57	755.49	503.06	87.28	6.18	80.57	12.52	67.28	87.07	47.47	3.03	84.88	54.43
Sqstm1	0	0.71	3.7659e-291	4.95367e-287	0.95	0.75	1582.72	212.44	978.48	326.7	837.82	1266.96	1063.77	277.87	1434.4	1121.94	94.63	58.3	85.18	70.22	81.99	94.83	87.97	22.94	96.51	73.42
Itgav	0	0.78	1.08185e-284	1.42307e-280	0.82	0.44	709.38	24.54	495.2	83.69	292.56	647.03	199.4	46.28	529.49	388.86	82.22	10.33	69.15	27.16	46.98	85.44	54.59	5.84	71.22	53.16
Elovl5	0	0.84	2.09177e-283	2.75151e-279	0.74	0.38	499.51	91.74	177.37	111.96	227.57	267.1	65.15	93.78	321.95	142.71	74.42	32.58	37.65	36.29	45.7	62.45	26.58	9.09	61.05	25.95
Bcl2a1b	0	0.86	5.46518e-279	7.18889e-275	0.74	0.37	623.44	38.48	200.32	199.43	145.68	322.72	512.57	86.66	294.2	567.82	73.82	14.78	39.76	41.2	29.07	60	71.04	7.36	49.71	51.27
Ier5	0	0.79	1.15363e-278	1.51749e-274	0.86	0.55	868.82	161.74	419.3	277.81	402.69	337.17	335.18	190.65	873.7	494.99	86.04	43.74	61.78	57.61	58.14	62.59	62.66	16.67	82.85	56.33
Stat4	0	0.84	1.02237e-274	1.34483e-270	0.78	0.46	633.83	102.33	318.5	126.61	313.11	355.08	84.15	105.24	352.21	283.69	77.89	33.71	55.38	39.42	57.4	71.29	31.33	9.74	61.92	40.51
Nfkb2	0	0.7	1.42685e-269	1.87688e-265	0.78	0.38	465.63	35.52	285.16	76.36	250.07	357.98	148.4	36.54	357.51	261.61	77.5	11.84	51.42	22.93	47.81	73.88	45.57	3.68	60.47	47.47
Nr3c1	0	0.71	1.81096e-268	2.38213e-264	0.89	0.53	847.36	84.1	768.95	117.86	443.54	416.26	202.22	87.33	1169.12	448.42	88.57	27.45	83.89	35.45	60.6	72.38	50.95	9.74	93.31	48.73
Fosl2	0	0.69	9.21387e-268	1.21199e-263	0.84	0.42	793.47	6.36	782.08	10.76	593.77	568.18	126.64	23.14	837.91	483.17	83.85	1.06	80.65	3.64	69.38	82.31	33.86	1.95	81.1	56.33
Tigit	0	0.55	1.05505e-263	1.38781e-259	0.92	0.57	1221.72	5.91	1073.03	343.18	607.98	1193.97	1177.75	145.81	1487.59	746.62	92.55	1.13	87.45	48.22	62.16	94.29	92.72	12.55	95.35	56.96
Hspa5	0	0.64	1.63792e-261	2.15452e-257	0.96	0.74	1674.88	188.97	1364.75	349.98	919.39	1337.49	694.29	256.68	2631.64	1328.31	96.17	51.06	93.04	66.75	85.47	94.97	83.07	19.48	97.97	72.15
Ubald2	0	0.7	1.83922e-259	2.41931e-255	0.94	0.66	2015.77	128.79	1746.52	121.17	1613.73	2249.54	443.99	109.05	1277.86	1155.78	93.79	41.86	91.9	38.07	89.58	97.55	74.21	9.31	84.88	64.56
Gm26669	0	0.83	1.52318e-252	2.00359e-248	0.85	0.57	1054.92	160.09	625.36	325.2	373.17	365.71	289.5	195.9	1445.73	442.91	84.65	44.27	70.69	60.32	57.22	66.94	56.33	15.15	89.24	47.47
Lilr4b	0	0.93	1.53402e-251	2.01785e-247	0.64	0.24	580.19	4.24	387.13	20.51	141.54	447.76	148.49	10.82	150.66	430.14	63.84	0.45	50.69	4.99	19.65	62.86	31.33	1.08	22.97	43.67
Bcl2a1d	0	0.88	2.15256e-251	2.83148e-247	0.53	0.19	336.5	6.65	67.14	58.03	48.37	166.23	236.43	24.08	119.35	241.54	53.3	2.04	17.33	19.04	12.89	38.64	52.06	2.6	28.49	31.65
Tgif1	0	0.72	1.14398e-250	1.5048e-246	0.8	0.42	596.4	31.79	433.97	51.11	381.55	438.27	161.72	35.95	445.21	368.47	80.18	10.78	67.21	15.48	59.32	78.64	40.03	3.03	72.67	50.63
Zc3h12a	0	0.73	4.22952e-250	5.56351e-246	0.71	0.32	408.19	26.83	250.7	48.47	208.72	211.7	141.83	22.88	355.67	202.88	71.24	10.26	48.1	16.33	41.5	55.37	37.03	3.03	66.86	41.77
Pdcd1	0	0.99	9.80703e-247	1.29002e-242	0.61	0.24	620.31	9.81	178.84	124.44	113.27	137.16	439.11	48.8	794.94	185.69	60.85	3.32	21.38	24.62	16.36	25.71	64.08	4.98	75	18.35
Id2	0	0.83	5.41379e-245	7.12129e-241	0.78	0.42	1046.86	21.32	707.47	112.25	197.46	795.85	571.72	72.24	1599.38	652.58	78.19	5.81	66.48	22.59	30.53	80.41	73.26	6.71	88.66	56.96
Junb	0	0.6	1.43813e-244	1.89171e-240	1	0.93	7953.06	1451.95	7269.99	2058.34	6365.44	6064.43	2405.31	1244.82	9155.5	5366.32	99.8	88.01	99.84	93.23	99.54	99.59	93.35	55.41	99.71	81.01
Srgn	0	0.6	3.4185e-243	4.49669e-239	0.99	0.9	4762.34	508.13	3534.48	1717.89	2854.16	4733.34	3915.19	835.64	4304.89	2735.62	98.91	80.69	98.38	94.25	97.26	99.18	98.42	44.81	98.55	79.75
Prr7	0	0.78	1.33115e-241	1.751e-237	0.6	0.21	330.39	7.13	203.37	13.92	129.36	202.35	34.26	15.5	243.42	143.1	59.46	2.94	37.73	5.58	27.79	49.93	12.18	1.73	46.22	29.75
Vps37b	0	0.59	2.52046e-230	3.31542e-226	0.95	0.65	2075.26	152.63	2225.43	80.39	2306.72	1820.2	364.13	178.85	1392.55	1359.48	94.83	44.19	95.38	22.84	97.07	97.69	63.29	11.26	89.83	65.19
Dgat1	0	0.62	1.87241e-227	2.46297e-223	0.83	0.45	801.93	15.27	774.36	35.14	496.62	967.93	310.76	32.39	495.32	627.11	82.66	5.51	77.89	11.93	61.97	91.02	59.34	3.9	72.97	55.06
Il21r	0	0.74	3.35941e-226	4.41897e-222	0.83	0.55	879.41	161.75	655.2	148.18	461.5	667.91	164.89	137.3	570.47	456.67	83.31	47.51	71.98	43.32	63.53	80.14	47.47	13.2	62.21	53.16
Ptpn13	0	0.83	4.2195e-220	5.55033e-216	0.5	0.16	282.97	14.52	93.89	60.58	86.49	53.13	18.82	45.01	298.64	51.81	50.22	5.96	19.6	20.56	17.37	15.51	6.8	4.33	58.43	13.29
Nfkbid	0	0.88	3.61717e-219	4.75803e-215	0.58	0.23	427.94	32.34	180.69	88.87	136.7	150.22	131.25	49.66	273.43	145.98	58.12	11.01	31.58	18.1	24.5	31.84	31.49	4.11	40.7	20.25
Ell2	0	0.71	1.30219e-210	1.7129e-206	0.55	0.21	264.32	9.03	154.68	17.72	126.42	160.18	29.57	10.86	148.24	105.07	55.24	2.79	35.38	7.11	29.16	45.85	13.29	1.52	40.41	28.48
Cldnd1	0	0.68	6.96036e-209	9.15566e-205	0.75	0.41	623.75	31.17	531.32	152.26	230.22	392.68	56.84	86.62	1087.06	231.28	75.21	11.84	67.53	36.8	41.41	67.62	20.09	8.23	92.44	36.71
Slc25a19	0	0.74	1.04228e-208	1.37101e-204	0.58	0.28	330.57	23.38	104.31	57.57	134.25	256.07	97.34	33.56	291.89	141.53	58.27	9.88	27.29	21.83	31.08	62.18	34.34	3.68	54.94	33.54
Lmna	0	0.76	2.12244e-207	2.79185e-203	0.67	0.3	662.6	11.66	748	42.83	203.75	145.99	146.99	41.72	958.62	459.51	67.21	2.71	68.66	10.91	29.52	31.7	29.11	3.68	84.01	42.41
Csrnp1	0	0.7	2.68553e-207	3.53255e-203	0.71	0.38	467.22	59.15	305.57	58.6	257.46	252.19	187.26	43.38	376.29	233.65	71.39	20.59	53.77	21.15	47.35	57.28	46.2	4.55	69.19	37.97
Hacd3	0	0.7	3.1896e-206	4.1956e-202	0.62	0.29	325.89	27.56	135.04	91.55	110.23	177.92	89.58	33.22	403.75	117.46	61.95	10.78	34.25	30.2	27.7	48.84	32.59	4.33	73.55	26.58
Ern1	0	0.74	1.53658e-205	2.02122e-201	0.56	0.22	340.78	1.96	242.41	6.81	105.67	211.35	21	5.85	492.56	128.34	56.53	0.9	43.16	2.62	22.67	52.11	8.23	0.43	70.64	25.95
Relb	0	0.61	3.82639e-204	5.03324e-200	0.74	0.39	431.79	45.08	299.85	93.72	294.82	342.33	87.36	48.95	321.83	287.08	74.22	15.23	53.52	28.26	53.56	71.56	30.7	4.76	58.43	46.84
Nr4a3	0	0.74	2.09474e-203	2.75542e-199	0.6	0.25	385.42	10.37	217.06	25.47	243.98	253.16	80.99	5.39	281.88	204.55	60.16	4	41.3	5.41	39.49	52.24	18.67	0.43	49.42	30.38
Nrip1	0	0.72	8.43395e-200	1.1094e-195	0.83	0.55	868.45	145.82	707.13	167.85	440.21	433.94	190.15	127.65	980.46	449.88	82.61	41.78	75.47	41.62	58.87	73.61	49.53	12.34	89.83	49.37
Myo1e	0	0.74	2.61183e-196	3.4356e-192	0.53	0.22	284.9	11.83	121.42	71.69	80.58	112.34	69.2	44.86	274.11	139.66	53.1	3.92	27.45	24.03	21.3	34.01	26.74	4.11	57.27	27.85
Mif4gd	0	0.64	8.55519e-195	1.12535e-190	0.78	0.48	506.82	67.02	215.48	201.06	311.36	390.69	230.32	154.76	288.72	276.58	77.55	23.91	48.1	51.44	56.76	74.56	61.55	13.64	59.3	44.3
Dusp1	0	0.64	3.67208e-193	4.83026e-189	0.95	0.73	2232.55	328.43	2021.71	822.11	1254.19	1052.95	1053.39	273.79	2984	1444.29	94.88	51.06	90.12	70.47	82.18	88.84	81.96	19.26	96.51	67.72
Gabpb1	0	0.68	4.29168e-193	5.64528e-189	0.63	0.3	352.8	28.56	218.79	43.88	205.97	231.69	65.17	40.51	223.73	184.05	63.24	11.54	41.94	16.41	41.59	55.92	25.95	4.33	48.55	34.18
Abcb1a	0	0.73	8.37041e-192	1.10104e-187	0.56	0.22	306.36	10.02	193	38.98	153.02	119.36	38.35	22.17	204.75	163.59	56.43	3.77	40.73	13.45	30.53	33.47	14.4	3.46	47.38	26.58
Dennd5a	0	0.69	3.06236e-189	4.02823e-185	0.49	0.18	234.18	21.88	93.52	30.11	61.41	122.38	21.19	15.56	305.18	105.48	49.38	9.13	23.72	11.08	18.19	35.51	9.34	3.03	59.01	24.05
Isy1	0	0.68	7.54748e-188	9.92795e-184	0.76	0.46	591.96	53.11	387.57	77.01	378.94	462.63	222	43.74	567.96	327.99	76.11	21.19	61.54	27.07	57.95	77.28	56.33	5.19	75	48.1
Ky	0	0.68	7.76705e-187	1.02168e-182	0.38	0.1	177.62	0	86.46	2.25	12.17	109.21	4.01	0.79	224.5	74.36	38.1	0	18.95	0.76	3.38	28.71	1.9	0.22	48.84	16.46
Stx11	0	0.71	2.94303e-183	3.87127e-179	0.6	0.29	410.74	4.89	209.77	52.87	133.45	352.21	103.81	33.65	746.69	106.94	59.71	1.96	41.62	19.12	30.71	62.99	35.76	3.68	72.97	23.42
Fam107b	0	0.54	9.51872e-183	1.25209e-178	0.96	0.81	1536.34	318.05	1311.77	482.89	1290.72	1212.05	605.13	462.65	1474.13	845.8	95.88	69.53	92.06	79.61	91.77	95.24	84.02	32.03	93.9	67.72
Gpr132	0	0.51	3.69483e-180	4.86018e-176	0.86	0.56	679.91	98.96	730.07	106.64	610.13	607.99	133.9	85.33	478.95	447.24	86.04	32.73	83.16	32.15	77.7	86.53	42.25	9.09	78.78	60.13
Ccr8	0	0.68	1.9238e-176	2.53057e-172	0.52	0.23	392.69	3.34	143.67	69.01	77.77	337.07	372.91	10.69	623.72	90.24	52.51	1.51	21.38	14.89	15.27	54.56	53.01	1.73	67.15	18.35
Mxi1	0	0.57	1.2013e-171	1.58019e-167	0.74	0.41	536.4	30.24	552.29	30.43	311.98	554.22	149.59	28.74	572.02	346.42	73.92	10.56	72.39	11.34	51.1	80	42.09	3.25	78.78	48.73
Snx18	0	0.55	1.7008e-167	2.23723e-163	0.76	0.45	497.3	49.84	350.28	65	462.4	533.89	176.01	39.94	290.2	271.47	75.46	17.87	60.24	23.01	68.56	82.59	50.63	4.55	62.79	44.94
Lmnb1	0	0.58	1.75282e-164	2.30566e-160	0.72	0.43	518.84	41.34	381.38	85.48	303.48	550.2	202.34	113.92	470.23	320.27	72.18	16.59	60.89	29.7	47.71	76.33	50.16	10.82	68.02	42.41
Nav2	0	0.64	1.44781e-163	1.90445e-159	0.39	0.12	193.32	4.39	70.49	76.26	26.96	73.48	9.9	36.38	243.23	93.43	39	1.43	17.49	17.17	7.13	17.82	3.96	3.25	47.97	13.29
Sytl3	0	0.74	2.8666e-163	3.77073e-159	0.45	0.17	282.84	1.18	130.73	5.83	27.83	225.47	105.18	6.89	362.56	211.46	44.66	0.45	25.59	2.2	7.5	45.99	32.44	1.08	52.91	20.25
Birc3	0	0.65	1.44869e-160	1.90561e-156	0.73	0.45	527.1	107.92	302.46	95.08	374.58	336.87	146.44	79.18	449.17	323.13	72.58	33.41	55.47	29.86	59.41	67.62	42.72	6.71	63.37	48.1
Slc25a3	0	0.53	1.98045e-158	2.60508e-154	0.92	0.78	1034.56	351.76	590.01	440.15	657.96	1041.73	545.69	397.27	629.23	679.86	91.65	75.72	79.43	78.51	81.08	93.61	88.13	30.74	85.76	70.89
Tank	0	0.57	4.25775e-157	5.60065e-153	0.69	0.42	396.86	88.75	212.28	133.79	216.49	253.98	150.22	123.06	440.64	263.17	69.4	29.79	43.64	38.24	43.88	61.9	47.47	10.17	70.64	41.77
Irf2bp2	0	0.72	9.21559e-157	1.21222e-152	0.67	0.4	493.91	108.35	196.23	213.06	331.65	129.46	105.88	118.53	295.31	292.48	67.16	33.71	38.46	52.03	55.03	33.74	36.55	9.52	51.16	41.14
Coq8a	0	0.56	7.05368e-155	9.27842e-151	0.41	0.16	182.89	6.73	59.32	15.2	85.99	264.24	25.05	11.9	47.16	80.66	41.18	3.02	15.47	6.68	20.48	57.96	9.97	1.3	15.41	18.99
Icam1	0	0.62	4.77966e-150	6.28716e-146	0.56	0.28	338.71	30.35	171.42	97.59	146.57	198.88	187.12	61.14	334.13	201.42	55.99	9.8	30.04	24.03	28.79	44.49	46.2	4.98	50.58	33.54
Fam110a	0	0.61	1.02043e-148	1.34227e-144	0.52	0.25	259.59	6.86	163.34	34.81	86.82	195.99	178.09	21.36	180.42	92.38	52.26	2.94	37.25	13.79	20.57	50.61	48.89	2.6	43.02	25.32
Cpm	0	0.66	2.67627e-148	3.52036e-144	0.6	0.31	388.73	36.43	320.65	107.37	180.54	181.3	64.92	61.29	249.75	201.9	60.06	13.35	51.98	27.41	33.82	43.81	18.67	4.33	50.87	32.28
Tob2	0	0.79	3.57012e-147	4.69613e-143	0.54	0.28	428.01	43.47	256.13	53.58	211.37	238.06	84.82	32.46	135.78	221.31	53.75	15.16	40.97	19.46	35.28	44.63	29.59	4.11	28.2	36.08
Rab8b	0	0.55	3.64129e-146	4.78975e-142	0.68	0.4	377.36	53.06	275.48	100.1	209.77	282.15	178.36	64.56	341.7	219.25	67.76	19.38	54.01	33.25	43.69	64.9	50.79	6.93	64.24	37.34
Rab11fip1	0	0.58	6.3453e-146	8.34661e-142	0.54	0.28	272.21	18.88	169.91	52.56	100.45	239.34	138.74	21.3	232.8	118.03	54.25	7.77	36.52	20.9	25.59	58.64	41.77	2.6	47.67	25.32
Cd44	0	0.59	3.31677e-141	4.36287e-137	0.64	0.35	393.56	35.1	365.49	111.71	110.47	173.43	110.76	85.29	637.3	247.96	63.59	12.29	59.19	34.94	26.23	46.94	34.49	8.44	81.98	37.34
Pcyt1a	0	0.72	7.2333e-140	9.51468e-136	0.37	0.12	234.04	5.94	83.38	11	18.58	91.66	47.68	21	518.17	104.18	37.11	2.11	17.73	4.31	4.66	23.4	15.51	1.95	66.57	19.62
Furin	0	0.65	2.24001e-139	2.94651e-135	0.51	0.24	283.63	26.25	259.44	35.55	78.69	143.95	57.3	17.3	198.17	145.34	50.57	9.88	46.4	12.94	19.56	37.82	23.42	1.95	40.99	28.48
Tex2	0	0.56	2.03123e-138	2.67188e-134	0.48	0.2	215.85	11.53	183.53	13.21	123.57	118.8	23.9	10.5	187.09	97.59	48.19	4.52	39.76	4.74	28.24	37.69	10.28	2.16	43.31	22.78
Lyn	0	0.56	9.48719e-137	1.24795e-132	0.38	0.13	172.67	1.69	102.29	16.98	31.01	77.72	49.84	5.03	249.43	240.27	38.05	0.23	23.08	6.26	8.41	21.5	18.2	0.87	48.84	31.01
Nab1	0	0.56	3.92327e-133	5.16067e-129	0.6	0.34	303.42	55.46	176.34	70.84	176.01	219.29	119.19	41.54	254.83	186.54	59.66	20.44	39.11	24.7	38.67	57.69	42.88	4.55	55.81	34.18
Aebp2	0	0.51	4.37368e-133	5.75313e-129	0.73	0.48	456.53	59.08	425.39	117.91	293.55	391.22	200.8	97.25	343	290.79	72.98	21.79	67.13	37.82	53.2	77.41	56.96	10.39	65.99	50
Sik1	0	0.55	1.01515e-131	1.33532e-127	0.55	0.27	268.62	25.02	233.26	26.6	146.62	191.58	63.67	8.18	248.55	123.51	54.6	9.28	47.29	10.07	33.73	49.8	24.05	1.3	49.71	27.22
Lilrb4a	0	0.58	1.23256e-129	1.6213e-125	0.36	0.12	165.77	1.9	93.92	18	47.32	132.51	56.52	3.85	31.86	106.72	36.12	0.15	22.59	4.65	9.96	35.24	16.3	0.65	9.59	21.52
Nfkbib	0	0.53	1.60725e-128	2.11417e-124	0.6	0.35	284.99	56.78	167.94	77.2	146.13	208.63	153.6	33.76	197.95	217.36	59.81	20.81	41.3	28.93	35.37	56.33	49.05	3.9	51.45	40.51
Skil	0	0.5	1.504e-126	1.97836e-122	0.62	0.35	334.48	49.36	267.2	42.35	191.58	259.81	142.5	60.13	455.54	273.03	62.39	18.93	49.64	15.48	40.04	61.22	40.35	4.98	68.9	43.67
Bcl2l1	0	0.54	9.24076e-126	1.21553e-121	0.34	0.13	143.16	12.89	50.13	29.06	31.1	101.43	39.11	11.03	105.77	52.01	34.13	4.52	13.52	10.07	9.23	33.06	17.56	1.52	25	12.03
Stat3	0	0.6	4.0276e-125	5.2979e-121	0.79	0.62	881.79	191.35	555.78	179.64	508.71	1014.24	374.97	135.12	936.12	467.72	79.43	52.87	69.07	50.42	69.1	91.29	71.04	11.04	84.88	56.33
Tox	0	0.51	5.66092e-125	7.44637e-121	0.67	0.42	398.62	92.26	175.84	295.2	225.67	242.91	154.73	124.16	377.76	156.56	66.92	30.47	35.95	57.45	43.88	53.2	44.46	11.69	64.83	27.85
Myo1g	0	0.57	8.58624e-123	1.12943e-118	0.63	0.42	419.61	109.41	168.74	176.19	180.72	402.97	145.32	175.32	350.12	256.98	63.14	35.22	37.49	46.36	37.11	71.02	47.15	14.94	57.27	35.44
Ppp1r16b	0	0.53	1.0691e-122	1.4063e-118	0.58	0.33	286.45	49.01	186.01	63.95	171.82	196.62	133.1	46.81	228.63	146.12	58.47	17.72	41.7	22.42	37.02	52.65	44.15	6.28	54.36	31.65
Flnb	0	0.58	1.27558e-121	1.67789e-117	0.36	0.16	173.62	22.64	47.07	36.37	54.3	141.31	36.1	43.09	104.45	63.65	36.46	8.97	13.77	14.04	13.44	36.46	15.66	4.98	28.49	13.29
Npnt	0	0.51	4.48538e-121	5.90006e-117	0.2	0.03	94.29	0	10.12	1.23	0.35	3.31	1.71	0.79	273.39	22.48	19.72	0	2.59	0.51	0.09	1.36	0.79	0.22	50.58	3.8
Antxr2	0	0.53	9.62909e-118	1.26661e-113	0.46	0.21	201.51	19.18	160.14	39.81	95.77	97.78	24.39	33.44	172.86	112.41	45.95	7.16	36.76	15.31	24.31	30.34	11.55	3.9	42.73	26.58
Serp1	0	0.53	4.68004e-115	6.15613e-111	0.66	0.44	397.78	102.48	188.82	108.97	259.9	368.79	132.04	120.4	452.4	273.71	65.82	35.22	40.73	36.21	51.92	72.11	46.36	11.26	66.86	45.57
Gm45716	0	0.7	5.60197e-115	7.36883e-111	0.52	0.28	453.83	7.89	453.46	38.77	154.93	271.78	178.68	22.44	327.32	210.8	52.06	3.02	53.28	12.18	26.97	52.65	39.08	2.6	40.7	32.91
Hlf	0	0.53	1.70306e-114	2.2402e-110	0.29	0.08	129.77	0.17	113.9	4	17.55	45.65	9.07	0.28	110.01	44.2	28.76	0.08	23.72	1.61	4.3	15.37	3.96	0.22	27.62	10.13
Itpkb	0	0.53	1.72269e-114	2.26603e-110	0.72	0.48	467.58	150.47	314.95	215.82	346.82	241.46	133.89	87.39	369.28	214.19	72.53	43.21	56.6	52.28	57.13	54.15	39.4	9.31	61.34	39.24
Ctla2a	0	0.59	1.66048e-113	2.18419e-109	0.5	0.25	345.06	9.75	361.49	32.52	122.68	174.36	183.16	58.85	357.37	119.65	49.73	1.43	54.57	7.87	22.49	38.1	36.39	5.19	49.13	23.42
Arap2	0	0.6	5.8232e-112	7.65983e-108	0.57	0.33	339.95	137.69	149.66	111.72	241.89	109.78	68.23	123.31	115.98	150.57	57.28	41.33	31.9	31.73	44.88	31.97	26.11	10.82	26.74	21.52
Atf3	0	0.54	2.99846e-110	3.94418e-106	0.33	0.11	193.52	5.86	201.1	2.58	44.89	41.69	42.27	4.19	148.46	582.72	32.89	0.23	28.5	0.25	10.05	12.93	10.76	0.87	26.74	38.61
Kctd12	0	0.51	5.94208e-107	7.81621e-103	0.51	0.25	323.76	5.95	447.06	11.87	116.09	265.83	42.68	14.13	353.43	314.43	50.72	1.81	61.38	3.81	22.67	49.8	12.34	1.52	59.3	47.47
Rhoc	0	0.5	1.54798e-102	2.03622e-98	0.28	0.1	120.34	3.75	28.99	36.06	36.66	56.3	58.76	33.69	48.68	41.9	27.97	1.21	8.26	12.69	9.23	19.05	25.47	3.25	14.83	10.13
1700061F12Rik	0	0.53	7.53208e-102	9.9077e-98	0.17	0.03	96.45	0	4.06	0.22	2.16	0	1.58	0	301.92	12.02	17.29	0	0.89	0.08	0.55	0	0.47	0	52.03	1.9
Raph1	0	0.54	2.15562e-101	2.83551e-97	0.24	0.07	110.74	4.43	33.29	19.39	11.24	15.09	33.84	10.18	133.05	14.39	24.54	1.13	9.39	7.87	3.56	6.26	14.87	1.52	33.14	5.7
Calca	0	0.95	8.46169e-98	1.11305e-93	0.2	0.04	367.51	0	27.68	0	19.44	17.61	42.75	0	1360.24	70.4	20.07	0	2.83	0	2.1	4.08	5.22	0	51.74	5.06
Tnfsf8	0	0.8	3.15492e-97	4.14998e-93	0.45	0.24	511.48	72.31	330.72	71.75	286.2	156.7	17.06	23.91	531.19	146.36	45.11	21.87	34.49	16.5	36.75	21.63	2.53	1.95	53.49	13.92
Chd7	0	0.51	8.63487e-97	1.13583e-92	0.48	0.25	233.23	39.19	167.37	52.62	156.5	107.61	55.18	26.04	206.6	135.82	48.09	14.33	36.19	18.87	33.36	33.74	19.46	3.9	48.26	23.42
Serpinb6b	0	0.59	8.08989e-96	1.06414e-91	0.32	0.14	178.31	15.55	53.76	25.24	64.23	94.94	59.12	22.92	219.17	47.16	32.14	6.33	12.23	9.39	14.9	25.44	21.04	2.38	35.17	9.49
Acod1	0	0.51	1.88617e-92	2.48107e-88	0.14	0.02	82.08	0	9.29	0.97	22.47	27.09	8.09	0.85	9.83	28.86	14.36	0	2.11	0.42	4.48	7.48	2.53	0.22	2.62	6.33
Batf	0	0.58	3.98757e-91	5.24525e-87	0.56	0.37	427.63	41.77	211.05	168.72	329.13	254.32	219.43	74.94	396.29	198.1	56.53	14.48	38.95	36.89	51.01	51.02	53.96	6.93	53.2	31.01
Fas	0	0.51	7.26314e-91	9.55393e-87	0.37	0.17	168.77	50.52	43	43.64	98.69	92.04	34.2	54.4	112.97	59.89	36.96	17.72	10.2	15.91	21.48	27.07	14.56	5.63	27.91	12.66
Gem	0	0.54	1.01237e-78	1.33167e-74	0.38	0.2	297.71	5.28	131.38	17.98	206.75	491.3	153.21	9.55	105.36	138.7	38.2	1.81	20.73	5.75	30.07	57.82	33.39	0.87	20.64	20.89
Tmem158	0	0.6	1.84238e-77	2.42346e-73	0.25	0.1	181.14	18.85	11.65	23.03	37.91	294.18	51.89	27.61	18.16	73.7	25.14	7.16	3.08	6.43	7.22	43.81	13.77	1.95	4.94	10.13
Cxcl2	0	0.98	3.46498e-76	4.55784e-72	0.19	0.05	387.95	0.8	80.19	19.25	31.35	67.46	147.02	1.68	248.02	1298.64	19.08	0.15	8.34	2.12	3.84	9.25	5.7	0.22	14.83	37.97
Penk	0	0.66	9.74774e-65	1.28222e-60	0.17	0.05	316.59	1.75	27.9	105.35	31.53	182.3	90.22	100.74	1151.13	11.84	17.44	0.68	2.75	4.57	2.83	6.67	5.54	5.41	36.63	1.9
Myc	0	0.55	3.1199e-45	4.10391e-41	0.27	0.14	212.5	150.8	44.68	57.61	62.2	84.69	31.69	104.34	78.99	130.38	26.63	30.69	7.94	10.66	11.06	14.56	9.02	6.93	13.95	13.92
Ly6c1	1	1.54	0	0	0.5	0.02	1.68	436.4	1.83	25.06	32.53	0.36	15.68	85.12	0	1.1	0.5	49.7	0.4	5.5	4.57	0.14	0.95	5.41	0	0.63
Sell	1	1.48	0	0	0.84	0.1	2.98	617.38	0.54	210.78	91.73	2.93	39.27	253.54	0	18.4	0.94	84.31	0.32	36.13	18.19	0.82	12.5	18.61	0	1.9
Ms4a4b	1	1.31	0	0	0.98	0.39	83.33	1573.91	76.88	1049.06	402.25	87.47	336.37	1175.89	6.51	69.26	21.96	97.59	19.19	84.35	57.13	26.53	41.14	59.52	2.62	14.56
Gm2682	1	1.23	0	0	0.75	0.1	1.73	428.19	5.86	204.81	45.67	2.82	12.77	243.5	0.29	9.47	0.84	75.41	1.78	43.49	11.61	1.36	4.75	18.4	0.29	0.63
Klf2	1	1.09	0	0	0.95	0.37	146.41	1739.81	298.06	1391.69	888.27	130.49	178.92	1044.75	262.55	180.32	22.65	95.1	28.34	72.42	54.11	22.31	23.1	49.13	31.69	21.52
Ms4a6b	1	1.02	0	0	0.92	0.42	62.71	844.8	134.07	548.04	305.1	143.37	348.06	579.54	25.72	147.58	18.48	91.7	33.85	79.44	52.47	40.95	66.46	38.1	10.17	29.11
Tcf7	1	0.98	0	0	0.68	0.13	14.61	348	14.89	218.93	105.67	9.64	7.52	199.47	1.72	27.84	4.72	67.95	3.08	43.99	23.58	3.4	1.74	14.29	1.16	5.06
Bcl2	1	0.97	0	0	0.63	0.12	28.48	312.09	20.73	89.6	118.38	32.21	9.84	187.31	10.51	40.28	8	62.97	5.02	23.01	24.41	10.2	4.11	12.55	2.91	7.59
Actn1	1	0.96	0	0	0.57	0.06	6.49	239.33	15.14	49.03	51.94	10.92	7.75	117.62	3.49	101.74	2.09	56.56	4.45	13.28	12.43	4.35	3.01	11.04	1.45	6.96
Nsg2	1	0.95	0	0	0.57	0.07	7.72	241.01	3.95	85.93	45.4	4.32	2.34	147.29	8.78	0	2.24	57.32	1.21	22	11.52	1.36	0.79	10.17	3.2	0
Evl	1	0.86	0	3.11005e-307	0.64	0.13	15.37	264.28	18.78	169.51	63.11	6.62	16.43	160.97	5.44	88.75	4.92	63.8	5.67	41.88	17.28	2.31	6.01	12.99	1.74	10.13
Igfbp4	1	1.07	3.35705e-266	4.41586e-262	0.32	0.02	2.08	230.63	8.07	1.05	29.07	1.44	0	98.73	0	50.73	0.55	32.35	0.65	0.42	5.03	0.27	0	6.06	0	7.59
Il6ra	1	0.77	1.80447e-245	2.3736e-241	0.51	0.09	6.93	194.55	13.67	119.77	34.37	4.09	15.41	111.58	3.64	42.04	2.73	51.43	4.21	34.86	9.14	1.63	5.38	9.74	1.45	6.33
Tmsb10	1	0.51	1.98625e-234	2.61271e-230	1	0.98	2904.08	7067.02	3981.63	5578.67	4273.07	4165.71	6434.15	5859.22	2272.42	3074.74	98.26	99.7	98.46	99.66	99.09	99.18	99.37	97.62	97.09	85.44
S1pr1	1	0.72	2.45389e-230	3.22785e-226	0.68	0.21	29.28	331.94	57.57	272.85	230.93	27.92	41.42	221.19	6.72	40.25	8.3	68.25	14.41	52.12	40.59	9.25	11.23	15.58	2.33	8.23
Lef1	1	0.8	9.11697e-228	1.19925e-223	0.69	0.22	37.47	329.72	36.34	202.58	160.9	52.79	81.31	198.78	32.93	23.66	11.23	68.63	9.96	50.68	33.55	18.5	28.01	16.02	9.88	6.33
Ift80	1	0.71	7.05077e-221	9.27458e-217	0.48	0.09	10.81	174.14	6.28	83.94	44.77	11.86	18.52	145.71	7.32	9.11	3.53	47.66	2.35	25.13	11.97	5.03	7.28	11.04	2.91	3.16
Coro1a	1	0.59	1.09931e-220	1.44603e-216	0.99	0.83	571.82	1962.4	633.05	2014.97	894.46	920.29	1789.54	1894.09	424.24	682.87	76.65	98.72	76.92	98.31	83.27	89.93	97.63	71.43	71.22	67.72
Smc4	1	0.82	1.99966e-220	2.63035e-216	0.81	0.37	96.46	583.06	110.73	441.06	337.83	104.54	142.02	329.48	66.96	71.2	24.24	81.3	25.51	70.14	52.47	31.29	41.61	24.24	19.77	15.19
Ripor2	1	0.72	1.38245e-213	1.81848e-209	0.74	0.27	43.75	379.23	71	377	138.36	82.54	47.26	368.93	29	45.59	13.16	73.68	20.49	64.97	32.27	26.53	18.83	25.54	9.88	11.39
Slfn1	1	0.79	3.78574e-212	4.97977e-208	0.54	0.13	6.53	227.05	12.18	121.6	33.6	22.76	149.62	116.58	1.96	19.43	2.48	54.3	3.89	34.43	8.68	9.12	43.2	11.04	0.87	5.06
Sp100	1	0.72	1.0274e-210	1.35144e-206	0.83	0.38	77.2	483.5	98.85	425.96	137.55	104.85	320.84	433.99	61.87	64.08	22.7	83.41	26.48	76.73	32.82	33.06	70.09	31.6	20.93	15.82
Prkcq	1	0.69	6.88308e-182	9.054e-178	0.66	0.23	47.89	290.16	52.94	238.91	107.57	34.36	65.53	252.84	22.33	14.24	14.26	65.46	14.09	57.02	28.98	12.52	25.63	19.05	6.4	3.8
Gm9844	1	0.67	1.03508e-179	1.36155e-175	0.78	0.39	105.52	420.38	142.59	326.04	157.16	159.25	49.49	330.31	95.78	114.3	30.9	78.28	36.28	69.2	39.03	46.94	21.68	25.32	27.91	26.58
Klf3	1	0.69	1.09584e-174	1.44147e-170	0.65	0.23	33.2	353.06	98.62	377.01	175.24	43.06	20.54	252.2	24.53	56.62	9.49	65.01	19.76	63.62	33.36	13.61	4.91	21	7.56	13.29
Atp1b3	1	0.64	6.33133e-174	8.32823e-170	0.84	0.43	106.66	522.1	119.82	596.13	244.19	126.54	198.05	412.96	88.05	119.07	30.55	83.56	31.98	76.99	50	39.18	53.64	28.79	27.62	27.85
Dgka	1	0.66	1.71614e-171	2.25741e-167	0.84	0.45	132.96	519.28	130.08	437.65	292	188.07	189.12	390.99	76.45	65.54	35.72	83.63	32.79	73.77	53.02	50.34	53.01	28.35	23.84	18.35
Limd2	1	0.56	5.869e-171	7.72008e-167	0.96	0.71	391.72	1095.71	293.97	1066.23	534.5	617.44	854.08	896.26	286.54	418.17	65.72	96.15	53.93	94.08	73.4	81.63	92.56	50.22	57.56	50
Dtx1	1	0.67	6.31982e-164	8.31309e-160	0.36	0.06	2.67	155.02	7.01	116.93	18.19	3.88	4.6	114.23	0	28.12	0.75	36.43	2.35	26.65	5.39	1.5	1.74	10.82	0	2.53
Tspan32	1	0.63	1.84468e-162	2.42649e-158	0.7	0.29	43.65	318.27	71.24	333.14	78.56	63.01	134.72	310.66	46.06	62.66	14.56	70.36	19.76	69.04	22.85	23.4	45.09	24.89	15.7	12.66
Arhgdib	1	0.52	4.09256e-159	5.38336e-155	0.97	0.74	330.69	1199.26	503.44	1283.03	516.04	620.05	1034.3	1253.57	383.24	443.74	61.1	96.91	71.66	95.26	68.92	82.99	93.51	58.01	67.44	56.96
St8sia6	1	0.56	5.9869e-159	7.87516e-155	0.35	0.06	3.72	117.49	1.45	68.53	62.58	5.26	9.91	51.45	0.4	14.82	1.04	34.99	0.32	20.05	13.62	1.63	3.48	3.9	0.29	1.9
Pik3ip1	1	0.54	3.23558e-158	4.25608e-154	0.34	0.06	3.87	103.73	13.83	47.11	33.05	5.29	12.01	45.55	4.39	1.67	1.39	34.24	4.45	15.48	8.68	2.04	5.54	4.33	2.03	0.63
Arhgap45	1	0.51	1.51422e-150	1.9918e-146	0.93	0.6	192.15	678.76	242.61	765.19	369.71	267.31	439.56	719.94	183.6	186.57	45.45	92.99	50.77	90.69	62.61	61.9	80.85	44.59	43.9	32.91
Ablim1	1	0.61	1.91349e-150	2.51701e-146	0.77	0.4	86.27	409.38	153.87	318.38	230.15	129.22	161.79	358.54	88.88	88.19	24.24	76.62	38.46	68.1	44.97	37.82	50.95	27.06	26.45	17.09
Kbtbd11	1	0.61	4.71492e-146	6.20201e-142	0.61	0.24	58.56	261.89	109.24	125.3	145.49	101.84	55.57	166.22	16.58	62.1	16.64	61.39	24.62	35.28	30.99	29.93	22.31	14.29	6.1	15.19
Acp5	1	0.62	1.10049e-145	1.44759e-141	0.56	0.19	30.03	207.39	39.45	138.02	54.03	38.16	110.22	120.73	30.08	133.21	11.03	56.18	12.79	38.92	16.73	16.05	38.92	12.12	11.92	18.99
Chd3	1	0.61	1.56276e-140	2.05566e-136	0.8	0.45	146.26	470.95	169.59	351.86	224.69	189.5	174.35	347.53	170.94	149.91	36.07	79.56	37.25	70.81	47.44	49.66	51.9	26.19	41.86	35.44
Txnip	1	0.64	2.35611e-134	3.09923e-130	0.79	0.45	135.49	562.04	364.93	376.34	199.12	127.18	317.28	352.28	228.59	231.66	30.35	78.73	56.36	66.75	41.04	34.83	63.92	25.97	46.22	36.71
Traf3ip3	1	0.56	1.02553e-131	1.34898e-127	0.58	0.22	31.05	213.43	49.64	186.88	60.35	44.84	111.51	198.17	27.84	59.62	10.58	58.14	14.66	50.93	17.92	18.1	39.08	17.1	10.17	12.66
Ikzf1	1	0.58	3.24301e-127	4.26585e-123	0.54	0.19	31.79	198.38	47.54	134.39	73.58	45.22	74.98	129.51	39.76	92.93	9.89	54.07	14.17	41.71	20.11	17.41	29.27	12.55	13.37	13.92
Pdcd4	1	0.55	2.00646e-126	2.6393e-122	0.76	0.42	123.46	401.02	185.48	356.37	174.46	121.88	149.76	339.56	121.05	101.14	33.13	75.64	41.46	70.14	40.13	37.01	42.72	26.62	31.69	22.15
Prkd2	1	0.54	1.60012e-125	2.1048e-121	0.48	0.15	19.9	155.12	25.72	132.42	38.87	26.33	65.97	99.37	16.44	24.78	6.81	47.89	7.77	42.3	12.07	11.02	27.37	10.17	6.69	6.96
Pik3cd	1	0.55	4.35461e-124	5.72805e-120	0.57	0.22	39.34	210.74	56.22	162.89	72.99	72.42	79.19	172.88	26.65	44.93	11.67	56.79	15.95	45.77	20.75	26.12	29.91	14.94	9.01	10.76
Gm8369	1	0.57	5.77241e-123	7.59303e-119	0.71	0.34	47.86	373.06	135.15	310.46	276.66	112.91	247.37	268.71	22.45	65.73	13.26	71.27	31.5	61.51	48.99	35.1	59.81	21.43	7.27	17.72
Rasgrp2	1	0.56	1.9197e-122	2.52517e-118	0.48	0.16	34.99	184.44	34.31	138.5	76.9	31.91	14.06	167.06	14.68	63.49	11.18	47.81	10.45	35.96	21.02	11.43	5.85	13.85	4.65	11.39
Arhgap15	1	0.54	6.81883e-122	8.96949e-118	0.75	0.4	124.21	358.65	119.26	292.96	198.07	106.21	132.9	300.73	113.41	87.24	33.88	75.04	31.74	66.58	43.97	34.83	46.99	25.11	34.59	19.62
Gpr83	1	0.53	3.0334e-121	3.99013e-117	0.23	0.03	2.99	88.75	12.12	16.53	16.13	5.08	2.16	41.92	5.86	3.47	1.09	22.62	3.08	5.16	4.11	2.04	0.79	4.11	2.33	1.27
Slc44a2	1	0.53	1.44059e-119	1.89496e-115	0.53	0.2	36.22	181.82	53.32	131.84	61.58	50.48	65.92	126.6	31.51	21.43	12.02	53.09	15.55	41.46	18.37	18.37	25.47	12.99	11.34	6.96
Ccnd3	1	0.52	1.3699e-114	1.80197e-110	0.57	0.23	32.39	220.35	76.85	196.05	59.27	42.3	168.45	219.76	39.96	46.06	10.28	57.32	21.86	48.65	16.91	16.73	46.36	17.75	13.95	10.76
Inpp4b	1	0.51	1.48043e-114	1.94736e-110	0.86	0.58	210.76	612.53	363.15	503.35	411.72	285.25	256.44	509.8	97.57	170.76	47.59	85.52	63.4	77.07	66.18	65.03	62.34	33.12	28.2	33.54
Add3	1	0.51	2.78796e-113	3.66728e-109	0.52	0.19	32.04	181.06	46.62	170.84	60.97	46.3	58.54	153.21	25.23	26.95	10.28	51.66	14.33	44.33	17.82	18.23	21.84	14.07	9.3	9.49
Ifi47	1	0.56	6.65153e-112	8.74942e-108	0.56	0.22	25.25	253.24	43.12	159.2	113.7	73.37	357.08	162.61	26.46	76.37	8	56.03	12.39	40.36	22.76	22.45	67.41	13.85	7.85	14.56
Stk38	1	0.51	5.0259e-109	6.61106e-105	0.54	0.21	44.26	196.41	52.92	159.17	90.8	46.97	68.29	156	41.98	43.33	13.76	54	15.63	42.72	24.59	17.01	26.74	14.07	13.95	10.13
Rbm38	1	0.54	3.19698e-108	4.20531e-104	0.68	0.33	89.07	306.8	95.26	261.52	93.65	96.34	201.46	305.82	54.52	73.58	25.88	67.72	24.53	60.15	24.22	32.24	56.65	24.24	18.31	16.46
Twf2	1	0.52	3.19596e-106	4.20397e-102	0.54	0.21	37.24	187.95	44.24	145.79	60.46	47.35	100.11	164.76	43.27	37.89	12.72	53.92	14.25	44.84	17.55	19.46	39.87	12.77	15.41	10.76
Slfn2	1	0.52	3.104e-98	4.083e-94	0.78	0.44	124.35	490.68	166.13	478.71	221.93	175.28	493.46	425.18	123.23	259.26	28.71	77.6	35.14	73.27	42.69	46.94	78.32	29.44	23.84	41.77
2810474O19Rik	1	0.54	6.78679e-95	8.92735e-91	0.65	0.33	85.32	340.1	120.59	336.06	147.11	97.14	198.3	263.36	74.42	87.1	24.04	65.16	27.29	59.56	31.08	30.61	49.84	21.21	18.6	16.46
Ccr2	2	1.28	0	0	0.7	0.19	92.96	1.57	680.3	93.22	126.52	306.83	299.79	47.19	50.11	233.01	18.48	0.38	69.47	17.6	19.56	44.9	46.84	4.98	13.66	31.65
Ctla4	2	0.94	0	0	0.97	0.8	1061.06	395.23	3117.95	761.99	1605.3	2644.34	1367.56	475.9	1817.71	1486.63	84.55	64.03	96.68	82.4	91.04	98.91	89.87	32.9	95.64	63.92
Itm2b	2	0.81	5.16582e-306	6.79512e-302	0.95	0.89	785.67	962.62	2392.91	1106.77	892.06	1169.25	1239.09	1041.14	1374.86	1640.2	85.69	96.08	95.06	95.43	82.91	95.1	96.2	51.73	95.93	82.28
Odc1	2	0.97	2.07901e-251	2.73473e-247	0.95	0.63	3889.56	39.01	4835.93	161.28	1881.35	2651.43	1422.75	130.7	1860.97	2552.52	95.18	12.9	95.38	34.01	79.52	97.28	85.44	9.74	76.16	65.82
Icos	2	0.86	9.16194e-251	1.20516e-246	0.93	0.61	792.89	46.13	1701.83	388.88	786.94	1745.99	568.73	172.01	1253.11	996.42	76.15	13.95	93.12	61.51	71.21	95.78	75.95	13.42	86.92	58.86
Maf	2	0.88	3.98291e-228	5.23912e-224	0.82	0.44	252.61	29.75	781.68	248.3	319.91	605.16	248.52	143.28	518.71	437.78	48.53	6.56	81.62	50.68	44.61	78.1	58.39	12.12	70.35	53.8
Il10	2	1.17	1.20838e-227	1.5895e-223	0.58	0.15	189.04	0	664.94	30.37	74.73	172.73	145.38	19.53	969.35	198.53	17.78	0	57.81	5.08	10.69	33.88	25	1.52	68.31	27.22
Vim	2	0.78	1.24319e-192	1.63529e-188	0.94	0.74	1592.8	418.6	2867.96	882.28	922.74	2136.04	1965.35	810.7	2142.09	1456.33	86.49	59.8	94.17	67.09	61.06	88.3	91.61	40.04	95.93	68.99
Tmem64	2	0.82	6.49365e-191	8.54174e-187	0.85	0.54	533.39	185.6	1060.54	155.5	953.36	416.23	134.77	200.19	503.19	483.42	65.38	46.76	84.62	38.32	79.07	62.72	36.87	15.58	65.41	43.67
Saraf	2	0.69	1.67121e-183	2.19831e-179	0.86	0.65	388.72	271.9	858	234.28	622.26	531.48	251.38	247.13	526.89	393.69	67.96	63.42	85.83	57.28	75.14	81.9	63.77	20.56	80.23	51.27
Mbd2	2	0.69	4.00778e-173	5.27183e-169	0.82	0.59	298.08	217.58	675.56	257.99	304.99	385.93	320.13	208.57	384.98	418.37	59.71	58.52	81.62	63.45	53.29	72.24	72.31	18.61	68.31	53.8
Cytip	2	0.57	1.80376e-160	2.37267e-156	0.96	0.86	1073.45	713.74	1814.43	497.64	1543.38	1626.96	623.88	515.55	1178.05	1092.17	88.87	89.06	96.44	78.26	95.43	97.41	85.44	35.71	92.15	73.42
Gna13	2	0.67	3.25429e-160	4.28069e-156	0.9	0.63	848.3	82.4	1198.5	131.85	930.55	1104.54	346.34	120.69	897.96	665.88	85.35	27.83	89.88	37.73	83	93.47	68.67	10.39	85.76	63.92
Vps37b	2	0.6	3.94022e-160	5.18297e-156	0.95	0.68	2075.26	152.63	2225.43	80.39	2306.72	1820.2	364.13	178.85	1392.55	1359.48	94.83	44.19	95.38	22.84	97.07	97.69	63.29	11.26	89.83	65.19
Got1	2	0.82	1.53622e-157	2.02074e-153	0.78	0.45	643.05	21.48	1107.51	31.24	684.18	1227.78	265.88	43.04	393.88	646.84	65.92	8.37	78.54	12.52	67.92	91.29	51.11	4.98	50.29	55.7
Dusp4	2	0.76	6.21163e-155	8.17077e-151	0.73	0.38	423.61	15.23	630.02	19.95	305.22	536.3	112.74	15.37	536.41	275.45	60.06	4.98	73.36	8.21	46.98	78.78	35.44	1.95	70.64	38.61
Tmem176b	2	0.85	6.46143e-154	8.49937e-150	0.3	0.05	11.05	10.93	183.29	10.54	24.96	41.64	5.68	24.28	18.57	245.73	3.38	2.87	30.04	2.62	5.21	10.48	1.58	1.73	5.52	34.18
Ahnak	2	0.75	3.06265e-153	4.02861e-149	0.88	0.61	839.45	132.92	1211.22	511.37	388.56	435.54	468.1	295.09	1141.71	473.22	81.77	26.85	87.94	68.7	52.74	67.76	74.84	22.08	90.41	50.63
Kctd12	2	0.78	5.19421e-139	6.83246e-135	0.61	0.26	323.76	5.95	447.06	11.87	116.09	265.83	42.68	14.13	353.43	314.43	50.72	1.81	61.38	3.81	22.67	49.8	12.34	1.52	59.3	47.47
Nfil3	2	0.72	1.16927e-136	1.53805e-132	0.69	0.36	306.22	8.89	529.89	44.73	319.4	454.12	182.97	42.05	275.83	323.2	53.45	2.26	69.23	14.97	46.44	73.33	47.31	3.9	52.33	45.57
Tnfaip3	2	0.51	2.19519e-135	2.88755e-131	0.98	0.76	2868.15	194.53	2411.09	381.56	1920.75	1628.36	690.75	196.77	1651.92	1669.75	99.11	45.32	97.57	61.68	91.77	97.96	78.32	15.15	95.06	73.42
Smap2	2	0.69	8.08059e-135	1.06292e-130	0.63	0.39	212.17	84.44	404.28	113.13	156.99	192.81	119.58	94.58	187.44	261.8	47.44	30.77	62.83	37.06	35.28	51.97	42.41	10.17	44.19	43.67
Emb	2	0.62	1.47789e-132	1.94401e-128	0.92	0.7	1093.47	183.78	1448.57	383.86	1167.55	1274.41	313.53	284.65	760.13	968.34	89.32	46	92.06	63.37	83.82	96.05	51.11	20.78	78.2	60.13
Lmna	2	0.8	1.03996e-131	1.36797e-127	0.69	0.33	662.6	11.66	748	42.83	203.75	145.99	146.99	41.72	958.62	459.51	67.21	2.71	68.66	10.91	29.52	31.7	29.11	3.68	84.01	42.41
Ubl3	2	0.65	5.24597e-125	6.90055e-121	0.8	0.56	496.78	70.52	698.78	204.77	397.19	459.73	246.13	147.78	382.23	381.64	73.67	25.26	80	53.64	60.51	77.55	61.87	14.07	66.86	51.27
Fosl2	2	0.58	6.84193e-124	8.99987e-120	0.81	0.47	793.47	6.36	782.08	10.76	593.77	568.18	126.64	23.14	837.91	483.17	83.85	1.06	80.65	3.64	69.38	82.31	33.86	1.95	81.1	56.33
Emp1	2	0.59	8.30869e-117	1.09293e-112	0.23	0.04	10.79	1.15	102.37	2.74	32.19	22.42	13.08	0	16.43	42.06	2.98	0.3	23.32	1.02	7.4	8.03	5.7	0	5.52	10.76
Rgs1	2	0.73	1.27391e-116	1.6757e-112	0.89	0.68	1462.78	274.01	2152.48	427.64	1040.22	1475.61	1080.38	351.68	1971.86	1858.28	85	43.21	88.58	52.12	76.05	89.12	77.85	23.59	91.57	74.05
Bhlhe40	2	0.53	2.7941e-109	3.67536e-105	0.84	0.54	1860.72	15.14	1527.11	95.2	793.06	1365.48	983.14	71.02	841.1	975.88	92.15	2.87	84.37	19.04	61.7	90.2	77.53	5.19	63.66	55.7
D16Ertd472e	2	0.6	1.48715e-108	1.9562e-104	0.69	0.44	308.69	47.65	452.61	64.71	266.76	346.99	168.54	52.42	408.17	216.74	60.11	17.42	69.15	23.35	50.82	72.11	51.42	5.63	70.64	38.61
Il4ra	2	0.64	3.29655e-107	4.33628e-103	0.72	0.47	422.37	105.84	566.49	58.82	383.82	366.46	63.6	58.2	354.57	423.77	67.46	35.82	71.98	19.8	59.05	71.84	26.42	6.49	61.63	52.53
Pde4b	2	0.65	6.03824e-107	7.9427e-103	0.66	0.42	237.29	126.28	481.52	104.5	329.45	330.78	110.24	96.55	214.42	313.41	44.51	36.58	66.07	29.27	54.39	67.89	33.54	10.61	41.86	48.1
Nr1d1	2	0.56	1.09902e-105	1.44565e-101	0.22	0.03	13.67	2.56	93.96	10.28	22.47	8.13	4.14	4.79	14.98	41.1	3.97	1.13	21.62	3.81	5.58	2.18	0.95	0.43	4.94	7.59
Fth1	2	0.56	3.93884e-105	5.18115e-101	0.99	0.96	3983.07	1186.99	5500.88	1359.07	3624.64	5988.96	2849.77	1144.02	3733.08	8914.74	99.25	97.66	99.03	97.46	98.35	99.18	99.37	55.19	99.71	99.37
4930503L19Rik	2	0.69	3.23597e-103	4.25659e-99	0.38	0.14	71.61	12.02	200.2	23.59	23.86	38.52	29.46	17.88	375.63	59.25	19.67	4.68	38.22	9.39	6.49	14.42	13.61	2.38	67.44	13.29
Tmem176a	2	0.55	3.82667e-98	5.0336e-94	0.21	0.03	7.53	8.11	97.55	8.68	12.26	28.24	1.97	11.03	9.51	186.72	2.33	1.73	20.65	2.37	3.38	7.89	0.79	1.08	3.2	27.22
Gpr132	2	0.53	3.1148e-96	4.09721e-92	0.83	0.59	679.91	98.96	730.07	106.64	610.13	607.99	133.9	85.33	478.95	447.24	86.04	32.73	83.16	32.15	77.7	86.53	42.25	9.09	78.78	60.13
Nr3c1	2	0.5	1.16485e-95	1.53224e-91	0.84	0.57	847.36	84.1	768.95	117.86	443.54	416.26	202.22	87.33	1169.12	448.42	88.57	27.45	83.89	35.45	60.6	72.38	50.95	9.74	93.31	48.73
Ikzf3	2	0.54	1.01067e-90	1.32944e-86	0.72	0.51	327.07	172.23	536.99	213.99	249.98	334.1	207.62	176.07	654.9	286.99	55.74	47.51	71.82	47.38	44.7	65.85	52.22	14.07	79.65	41.77
Ctla2a	2	0.56	3.00835e-90	3.95719e-86	0.55	0.26	345.06	9.75	361.49	32.52	122.68	174.36	183.16	58.85	357.37	119.65	49.73	1.43	54.57	7.87	22.49	38.1	36.39	5.19	49.13	23.42
Hspa1b	2	1.47	3.72982e-90	4.90621e-86	0.3	0.1	87.81	12.58	856.85	13.56	287.49	116	337.77	16.8	137.41	457.2	9.44	2.19	29.8	3.38	21.39	13.06	19.15	0.65	9.59	22.78
Dgat1	2	0.5	9.84632e-90	1.29518e-85	0.78	0.5	801.93	15.27	774.36	35.14	496.62	967.93	310.76	32.39	495.32	627.11	82.66	5.51	77.89	11.93	61.97	91.02	59.34	3.9	72.97	55.06
Mxi1	2	0.53	1.7194e-89	2.2617e-85	0.72	0.44	536.4	30.24	552.29	30.43	311.98	554.22	149.59	28.74	572.02	346.42	73.92	10.56	72.39	11.34	51.1	80	42.09	3.25	78.78	48.73
Rnf125	2	0.56	2.27826e-88	2.99683e-84	0.62	0.36	252.79	14.93	353.07	69.24	250.8	284.59	87.61	46.73	197.87	193.84	53.1	6.03	62.11	23.52	48.72	64.49	31.8	4.76	47.67	36.08
Atp2b1	2	0.55	2.84298e-88	3.73965e-84	0.76	0.52	385.59	159.33	553.31	256.8	311.72	301.85	132.77	140.72	458.36	319.94	64.08	39.89	75.71	57.02	53.75	61.77	41.14	13.85	69.48	45.57
Grap2	2	0.59	1.76903e-82	2.32698e-78	0.5	0.29	75.4	173.78	286.19	79.67	189.39	120.2	42.05	110.67	96.3	138.76	19.72	49.32	50.45	25.47	37.2	33.74	18.2	11.04	25.29	22.15
Ier5l	2	0.66	2.98602e-82	3.92781e-78	0.44	0.19	187.72	0.32	311.71	14.03	128.99	384.18	30.09	22.55	58.45	145.23	30.2	0.23	44.05	3.55	21.94	62.45	10.44	1.52	14.53	22.15
Foxo1	2	0.54	1.0879e-81	1.43102e-77	0.71	0.54	279.11	273.5	546.65	210.05	399.14	345.87	140.34	225.96	250.79	276.89	53.35	64.1	71.34	53.21	57.95	66.39	45.41	19.7	57.27	40.51
Ccr1	2	0.56	2.80249e-81	3.68639e-77	0.2	0.04	20.84	0	100.6	1.41	4.02	34.14	17.68	3.24	54.67	60.36	6.81	0	19.6	0.76	0.91	10.75	6.33	0.43	16.86	11.39
Klf6	2	0.64	1.4938e-79	1.96494e-75	0.77	0.62	411.37	378.04	934.13	378.22	617.18	401.3	592.1	252.43	674.98	554.68	57.48	63.8	76.76	60.83	69.38	68.16	77.53	19.7	68.31	54.43
Neurl3	2	0.56	4.16355e-79	5.47673e-75	0.71	0.47	516.13	56.75	589.24	86.79	498.64	388.62	132.69	55.9	317.51	428.65	70.09	19.16	71.34	26.99	64.26	68.57	36.55	5.63	61.34	54.43
Cebpb	2	0.61	3.38153e-78	4.44807e-74	0.62	0.4	219.39	40.98	491.11	140.3	405.81	329.01	338.32	78.28	218.43	499.88	43.32	12.67	62.27	35.11	53.11	60.14	66.14	6.49	42.73	56.96
Tiparp	2	0.61	4.08886e-78	5.37849e-74	0.4	0.18	115.75	16.6	242.18	24.41	58.4	88.33	40.02	17.99	610.49	135.75	24.49	6.33	40.16	8.97	15.27	25.58	18.2	1.95	65.41	24.68
Sdc4	2	0.57	7.84009e-77	1.03128e-72	0.52	0.27	251.15	18.43	296.91	32.45	59.51	224.96	93.29	17.95	231.7	316.02	48.19	6.94	51.74	9.39	14.72	52.38	29.59	2.38	49.42	43.67
Gpx1	2	0.5	2.46751e-74	3.24576e-70	0.65	0.51	172.3	226.39	467.9	279.57	225.96	283.76	295.81	312.35	189.86	645.24	40.83	60.03	64.86	61.51	42.87	61.63	66.14	22.08	46.8	60.76
Trp53inp1	2	0.55	1.24592e-71	1.63888e-67	0.57	0.36	216	57.84	346.89	134.15	235.8	198.2	126.1	72.75	150	156.32	42.82	20.51	57.33	37.06	45.61	44.76	37.18	8.01	37.5	30.38
Ccr4	2	0.55	2.06481e-71	2.71605e-67	0.4	0.19	88.61	6.44	200.17	73.18	123.6	117.5	34.38	51.74	82.77	89.36	23.75	2.34	39.76	23.35	26.78	33.2	12.18	5.63	21.51	20.25
Gzmb	2	0.79	5.26869e-71	6.93043e-67	0.39	0.18	315.97	3.37	1199.32	46.2	142.47	1017.84	1335.8	41.37	3918.16	530.06	17.09	0.38	39.27	4.74	11.61	46.39	54.11	3.46	54.94	18.99
Havcr2	2	0.51	1.38287e-70	1.81903e-66	0.22	0.07	27.98	0.12	104.27	1.78	6.38	60.91	54.57	1.46	85.39	50.83	8.05	0.08	21.86	0.68	2.19	18.5	20.73	0.43	20.06	10.13
Gm26778	2	0.55	1.45482e-70	1.91367e-66	0.32	0.12	106.88	3.38	151.27	3.96	30.11	71.67	10.24	0	94.37	77.54	26.63	0.98	31.82	1.61	8.5	21.09	4.43	0	23.55	18.99
Camk2n1	2	0.52	8.17511e-70	1.07535e-65	0.47	0.24	174.8	15.46	226	24.21	57.76	159.59	58.95	23.21	297.34	121.7	41.98	5.96	46.8	8.29	13.25	44.22	20.09	2.38	65.7	24.68
Gm45716	2	0.6	9.20841e-70	1.21127e-65	0.53	0.3	453.83	7.89	453.46	38.77	154.93	271.78	178.68	22.44	327.32	210.8	52.06	3.02	53.28	12.18	26.97	52.65	39.08	2.6	40.7	32.91
Cdkn1a	2	0.68	1.69059e-69	2.2238e-65	0.43	0.2	237.47	6.07	348.28	5.59	158.36	210.26	117.54	2.53	195.17	300.95	34.62	0.6	42.67	1.86	24.86	33.61	29.43	0.43	33.14	34.18
Fgl2	2	0.61	2.82477e-69	3.7157e-65	0.41	0.2	109.48	2.39	260.64	50.2	35.18	154.56	325.22	41.9	221.4	131.63	24.79	0.83	41.38	13.96	8.04	36.46	60.76	3.9	43.6	24.68
Tnfsf11	2	0.72	4.64892e-69	6.11519e-65	0.24	0.08	52.01	10.24	181.83	62.41	35.05	25.97	14.18	31.38	40.05	30.3	8.3	4.07	24.53	18.44	6.95	4.76	4.75	3.03	7.85	6.96
Dnajb1	2	0.68	8.13594e-69	1.0702e-64	0.51	0.38	186.45	96.21	430.08	92.57	298.12	166.06	211.49	63.54	238.62	232.41	41.23	32.58	51.09	32.06	47.99	45.44	49.68	6.06	45.64	36.08
Hspa1a	2	1.32	1.79086e-68	2.3557e-64	0.21	0.06	49.71	4.77	544.27	4.25	174.78	89.47	215.64	0	55.2	334.06	6.66	0.68	21.3	0.68	13.89	10.07	13.92	0	4.65	18.35
Ets2	2	0.53	9.51542e-66	1.25166e-61	0.52	0.32	258.58	32.92	318.86	25.41	163.53	278.11	102.54	20.5	195.94	239.2	51.96	12.97	51.9	9.48	33.91	60.14	32.91	2.38	47.97	36.08
Lztfl1	2	0.5	1.13101e-62	1.48773e-58	0.31	0.14	56.07	11.47	143.45	36.56	51.83	87.67	37.52	47.1	68.79	78.63	15.65	5.58	30.93	12.35	13.62	26.8	14.87	4.33	18.6	17.09
Hilpda	2	0.53	2.10608e-57	2.77034e-53	0.44	0.24	197.77	19.83	272.18	23.92	73.7	152.06	223.67	15.71	363.75	150.58	35.67	8.07	43.72	9.39	17.28	37.82	43.51	1.52	52.33	27.22
Malt1	2	0.52	1.62155e-55	2.13299e-51	0.57	0.4	206.99	76.86	400.48	193.67	224.33	281.88	192.26	148.27	377.61	316.09	42.82	25.49	57	45.43	40.59	56.73	46.2	12.99	54.94	41.77
Hsp90aa1	2	0.54	5.16357e-48	6.79216e-44	0.74	0.66	582.09	211.02	921.74	247.5	690.05	514.8	1085.08	161	648.29	560.15	74.17	54	73.85	57.53	76.14	77.28	81.01	14.94	79.65	59.49
Fosb	2	0.56	2.80965e-44	3.69581e-40	0.37	0.2	163.58	22.57	253.37	52.85	136.81	59.84	120.87	26.48	173.5	279.83	30.2	6.33	36.6	12.27	25.96	18.1	27.53	2.16	36.05	32.91
Hsph1	2	0.52	3.21599e-43	4.23031e-39	0.28	0.18	88.1	29.8	195.58	39.43	139.84	84.32	70.51	28.18	122.8	132.46	18.48	11.99	28.26	13.71	24.77	21.22	22.31	2.81	25.29	22.15
Fos	2	0.57	5.60504e-40	7.37288e-36	0.68	0.53	736.51	307.57	1070.57	469.91	918.75	278.97	391.43	213.82	1007.37	895.5	62.34	49.17	68.18	50.42	67.46	47.21	41.61	14.07	67.73	48.73
Rrad	2	0.55	7.54537e-38	9.92518e-34	0.33	0.23	141.64	35.6	254.91	44	165.87	202.06	85.6	31.96	86.17	129.9	25.63	13.27	32.96	15.23	29.34	40.68	28.8	3.68	18.31	26.58
Atf3	2	0.5	3.81062e-36	5.01249e-32	0.28	0.14	193.52	5.86	201.1	2.58	44.89	41.69	42.27	4.19	148.46	582.72	32.89	0.23	28.5	0.25	10.05	12.93	10.76	0.87	26.74	38.61
Jun	2	0.58	1.43516e-33	1.88781e-29	0.5	0.38	161.05	297.69	588.3	153.51	623.44	273.4	401.62	116.98	246.25	500.24	28.71	52.19	50.53	28.6	53.93	36.73	52.69	9.96	38.37	32.28
Itgb1	3	1.68	0	0	0.75	0.17	44.56	82.18	39.19	892.64	100.91	35.32	139	409.14	27.66	31.5	12.37	20.97	11.01	75.13	18.65	12.24	36.55	25.76	9.3	10.13
Nrp1	3	1	2.33647e-271	3.07339e-267	0.58	0.1	20.31	60.77	15.57	287.5	61.23	11.83	82.66	142.13	2.72	21.21	6.31	18.78	3.89	58.29	14.72	4.49	26.27	10.17	1.16	3.8
Ptprcap	3	0.79	4.39703e-201	5.78385e-197	0.92	0.59	207.73	596.71	238.2	998.01	198.13	516.88	975.13	718.95	280.09	203.1	46.15	87.33	46.8	91.96	38.12	79.46	91.14	43.72	56.4	36.08
Arhgap45	3	0.63	2.4915e-200	3.27733e-196	0.91	0.6	192.15	678.76	242.61	765.19	369.71	267.31	439.56	719.94	183.6	186.57	45.45	92.99	50.77	90.69	62.61	61.9	80.85	44.59	43.9	32.91
Shisa5	3	0.55	1.56166e-195	2.05421e-191	0.99	0.92	1175.27	1859.75	1034.04	2516.14	1281.1	1461.19	2266.19	1851.99	965.52	742.83	93.44	98.42	88.99	99.24	93.6	96.87	98.26	72.94	90.12	65.82
Ighm	3	0.89	4.52974e-190	5.95842e-186	0.74	0.33	78.11	292.47	69.33	530.15	153.44	228.3	145.18	383.23	65.29	141.78	20.86	59.35	15.87	73.94	34	52.24	40.51	25.97	17.73	24.68
Lbh	3	0.75	6.04211e-186	7.94779e-182	0.69	0.28	50.31	174.49	97.24	345.24	76.81	84.1	186.42	274.34	52.69	105.82	15.45	49.47	24.45	69.12	21.85	29.39	55.38	22.08	14.83	20.89
Atp1b3	3	0.77	1.38629e-180	1.82352e-176	0.77	0.45	106.66	522.1	119.82	596.13	244.19	126.54	198.05	412.96	88.05	119.07	30.55	83.56	31.98	76.99	50	39.18	53.64	28.79	27.62	27.85
Tbc1d10c	3	0.69	2.778e-173	3.65418e-169	0.78	0.37	66.63	292.79	129.43	406.6	118.96	111.02	247.61	329.92	62.45	104	19.62	69.61	31.82	77.92	30.44	37.28	63.45	26.62	21.51	22.15
Coro1a	3	0.6	4.77775e-173	6.28465e-169	0.98	0.83	571.82	1962.4	633.05	2014.97	894.46	920.29	1789.54	1894.09	424.24	682.87	76.65	98.72	76.92	98.31	83.27	89.93	97.63	71.43	71.22	67.72
Cd3e	3	0.54	4.31318e-170	5.67356e-166	0.97	0.84	576.3	847.77	710.58	1385.01	666.73	868.57	1311.36	999.17	665.66	394.11	82.22	94.04	83	97.29	80.71	93.06	96.84	54.76	87.79	53.16
Ms4a4b	3	0.73	6.44814e-170	8.48189e-166	0.84	0.42	83.33	1573.91	76.88	1049.06	402.25	87.47	336.37	1175.89	6.51	69.26	21.96	97.59	19.19	84.35	57.13	26.53	41.14	59.52	2.62	14.56
Actb	3	0.58	3.97383e-154	5.22717e-150	1	0.99	3549.12	9097.77	5123.39	11005	4850.87	5910.22	10091.9	9770.79	4688.62	7944.91	97.81	99.85	99.19	100	98.72	99.59	99.84	98.7	99.13	100
Klf3	3	0.74	1.55989e-152	2.05188e-148	0.64	0.24	33.2	353.06	98.62	377.01	175.24	43.06	20.54	252.2	24.53	56.62	9.49	65.01	19.76	63.62	33.36	13.61	4.91	21	7.56	13.29
Tspan32	3	0.66	2.57581e-146	3.38822e-142	0.69	0.3	43.65	318.27	71.24	333.14	78.56	63.01	134.72	310.66	46.06	62.66	14.56	70.36	19.76	69.04	22.85	23.4	45.09	24.89	15.7	12.66
Arhgdib	3	0.59	2.18673e-142	2.87642e-138	0.95	0.74	330.69	1199.26	503.44	1283.03	516.04	620.05	1034.3	1253.57	383.24	443.74	61.1	96.91	71.66	95.26	68.92	82.99	93.51	58.01	67.44	56.96
Bin2	3	0.63	3.26314e-140	4.29234e-136	0.74	0.38	83.41	317.17	109.11	402.63	162.76	110.28	227.66	346.54	81.57	161.13	23.15	69.98	28.83	74.03	38.94	35.51	62.03	26.19	24.13	31.01
Cdc25b	3	0.73	3.8056e-140	5.00588e-136	0.38	0.08	12.11	30.67	16.22	157.48	31.89	24.25	27.48	75.15	8.71	5.04	4.67	11.61	5.51	37.73	10.51	9.8	11.23	6.06	3.49	1.9
Cd48	3	0.65	2.05704e-138	2.70583e-134	0.66	0.29	49.82	174.81	70.5	297.6	72.48	68.47	217.28	289.27	69.49	97.22	16.84	52.64	19.76	65.65	21.39	27.62	63.61	22.51	24.13	24.05
Pfn1	3	0.55	8.52691e-138	1.12163e-133	0.99	0.95	1273.4	3022.5	1476.9	3615.83	1449.98	2179.05	3704.45	3355.31	1434.45	1939.21	93.09	99.25	93.28	98.98	91.32	96.46	99.05	89.39	95.64	92.41
Cd3g	3	0.56	9.9948e-138	1.31472e-133	0.95	0.78	450.99	692.29	563.1	1266.99	523.69	742.26	1790.42	924.38	541.51	364.62	72.58	90.8	77.73	95.18	72.58	89.12	96.52	50	78.49	50
Lsp1	3	0.66	5.73646e-137	7.54574e-133	0.87	0.63	249.26	454.37	334.04	824.51	341.47	363.17	651.6	685.34	208.83	413.97	52.11	82.05	61.13	87.14	57.4	71.97	87.5	42.64	52.03	46.84
Ripor2	3	0.69	1.61077e-136	2.11881e-132	0.65	0.29	43.75	379.23	71	377	138.36	82.54	47.26	368.93	29	45.59	13.16	73.68	20.49	64.97	32.27	26.53	18.83	25.54	9.88	11.39
Ppp1r18	3	0.61	2.12944e-135	2.80106e-131	0.84	0.5	137.64	422.93	186.62	512.45	120.49	164.41	407.46	405.64	234.07	177.5	38.35	80.92	42.43	83.84	32.45	49.12	79.27	31.17	54.07	32.91
Izumo1r	3	0.88	2.43304e-131	3.20042e-127	0.73	0.45	110.66	444.81	170.88	767.17	266.55	326.98	444.48	434.54	85.07	130.93	28.42	67.35	37.17	72.93	46.98	62.99	68.51	27.27	23.55	29.11
Klf2	3	0.77	7.27253e-130	9.56628e-126	0.72	0.42	146.41	1739.81	298.06	1391.69	888.27	130.49	178.92	1044.75	262.55	180.32	22.65	95.1	28.34	72.42	54.11	22.31	23.1	49.13	31.69	21.52
AI467606	3	0.67	1.25396e-122	1.64945e-118	0.56	0.2	23.42	142.9	51.24	229.17	35.53	42.16	159.37	137.22	34.55	34.65	7.55	42.76	14.82	55.67	10.33	15.78	49.05	14.07	10.76	10.76
Apobec3	3	0.61	1.50798e-120	1.98359e-116	0.7	0.34	82.1	190.12	81.74	337.4	120.1	133.81	292.98	275.2	78.91	113.6	24.79	50.75	22.02	69.54	30.35	43.54	68.67	21.21	24.42	22.78
Lrp10	3	0.58	2.36208e-120	3.10708e-116	0.72	0.36	87.37	147.11	113.85	328.98	124.02	158.41	303.46	230.34	106.5	112.84	26.58	45.1	30.12	71.66	31.54	50.34	71.99	19.26	31.98	28.48
Cnn2	3	0.57	1.0344e-119	1.36064e-115	0.9	0.63	235.31	705.65	285.14	830.79	349.77	415.44	653.84	879.82	270.91	284.92	49.28	89.67	54.25	90.1	56.12	74.69	87.97	52.16	56.98	40.51
Limd2	3	0.52	2.01462e-119	2.65003e-115	0.94	0.72	391.72	1095.71	293.97	1066.23	534.5	617.44	854.08	896.26	286.54	418.17	65.72	96.15	53.93	94.08	73.4	81.63	92.56	50.22	57.56	50
Maz	3	0.56	8.62279e-118	1.13424e-113	0.61	0.28	57.46	165.61	81.65	245.74	75.84	84.29	89.12	232.41	61.19	57.9	19.47	50.08	23.72	60.58	22.94	30.61	32.91	19.91	21.22	10.76
Slamf6	3	0.69	1.01763e-117	1.33859e-113	0.53	0.19	22.44	132.85	38.19	239.09	96.97	71.28	60.45	184.21	31.79	28.34	7.4	39.59	11.42	53.05	25.41	25.58	21.99	14.5	11.05	8.86
Cdc42se1	3	0.54	4.15013e-115	5.45908e-111	0.64	0.29	59.18	219.71	82.65	263.2	61.68	59.97	155.89	282.2	107.18	71.43	17.69	60.56	21.3	63.71	17.92	21.63	50.32	22.94	29.94	17.09
Pou2f2	3	0.64	1.19416e-114	1.5708e-110	0.45	0.14	31.69	119.69	27.5	187.14	42.45	24.49	25.73	101.5	63.67	31.38	9.64	36.2	7.45	45.09	11.06	8.44	9.18	9.09	16.28	8.86
Pycard	3	0.72	3.95034e-114	5.19628e-110	0.57	0.23	33.2	107.25	44.46	266.16	66.69	92.69	189.18	186.82	30.7	48.48	11.67	35.52	14.66	56.68	20.2	33.2	57.28	16.45	12.21	11.39
Csk	3	0.51	2.04262e-109	2.68686e-105	0.7	0.38	102.65	246.45	121.64	317.1	107.3	120.67	176.75	319.29	88.95	125.96	29.01	64.4	32.87	70.22	29.52	39.73	56.01	24.68	26.16	22.15
Tsc22d4	3	0.61	8.19162e-109	1.07753e-104	0.6	0.23	28.55	170.46	51	234.87	42.04	48.31	197.21	166.22	38.56	35.91	9.79	48.72	15.87	60.24	12.61	19.46	57.44	15.58	12.5	6.33
Dgkz	3	0.53	2.7801e-104	3.65694e-100	0.57	0.25	32.82	187.79	55.87	220.7	81.87	52.43	118.9	229.36	41.24	30.82	11.43	53.17	16.03	57.02	23.31	20.41	43.67	19.91	15.12	9.49
Sp100	3	0.57	3.52992e-104	4.64325e-100	0.77	0.4	77.2	483.5	98.85	425.96	137.55	104.85	320.84	433.99	61.87	64.08	22.7	83.41	26.48	76.73	32.82	33.06	70.09	31.6	20.93	15.82
Rinl	3	0.51	3.99017e-104	5.24868e-100	0.68	0.35	102.79	172.13	119.3	293.35	114.48	127.91	210.93	250.76	76.86	66.71	27.52	51.43	30.61	67.68	30.53	35.51	58.54	20.78	25.58	15.82
S100a4	3	0.87	7.30836e-103	9.61342e-99	0.47	0.3	139.85	9.52	248.81	540.89	111.62	179.31	400.5	354.03	105.19	277.68	31.99	1.51	46.15	46.95	22.67	40.95	62.97	21	25.29	27.85
Clec2d	3	0.56	8.8898e-103	1.16936e-98	0.73	0.38	117.04	368.31	125.28	409.18	139.08	141.23	257.44	343.58	123.1	148.59	24.79	71.64	28.83	73.1	31.26	36.73	56.8	25.76	27.03	24.05
Id3	3	0.71	1.52852e-102	2.01061e-98	0.35	0.09	15.39	144.09	29.72	196.21	30.37	6.93	9.77	106.65	11.57	63.83	4.12	32.2	3.16	35.19	6.86	2.72	2.22	7.79	3.2	10.13
Ephx1	3	0.61	3.57866e-102	4.70737e-98	0.42	0.17	37.76	104.23	50.96	194.86	56.08	50.27	35.42	138.14	52.31	51.12	11.82	32.81	13.6	41.62	14.35	18.1	14.24	12.34	16.28	13.92
Ltb	3	0.6	3.76695e-99	4.95505e-95	0.9	0.66	417.57	1002.43	397.34	1235.53	459.08	560.53	1600.09	839.93	143.3	393.07	58.42	91.93	53.85	90.52	58.23	74.56	94.78	46.54	29.65	47.47
Ifi203	3	0.6	6.30471e-96	8.29322e-92	0.64	0.3	55.96	273.48	68.3	317.04	106.74	80.1	279.04	233.54	27.57	53.34	15.8	62.44	17.73	64.3	25.87	24.63	60.13	20.13	9.88	15.19
Itgb7	3	0.54	1.62736e-95	2.14063e-91	0.78	0.57	223.4	404.69	316.03	596.05	222.13	316.7	421.06	468.94	222.65	145.67	50.47	76.62	59.68	77.92	45.06	63.95	76.42	31.39	50.87	30.38
S100a10	3	0.6	1.46437e-94	1.92623e-90	0.94	0.78	779.88	449.87	1133.26	1761.5	615.23	1020.63	2155.25	1468.09	877	497.72	77.65	78.43	87.29	94.16	63.62	89.52	97.78	56.06	83.72	48.73
Itgal	3	0.54	2.41142e-94	3.17198e-90	0.56	0.28	79.7	110.52	77.63	233.17	72.14	87.39	157.93	127.81	98.35	68.95	24.79	35.75	21.78	56.51	22.03	29.52	49.21	12.77	30.52	17.72
Art2b	3	0.64	3.39521e-94	4.46606e-90	0.29	0.07	7.1	57.81	6.74	130.65	17.94	23.32	20.98	51.51	0	11.84	2.38	22.4	2.11	29.19	5.39	8.16	7.44	4.11	0	3.16
Lax1	3	0.52	5.37167e-94	7.0659e-90	0.33	0.08	6.96	43.2	18.28	112.02	25.58	19.88	46.87	82.58	2.31	26.3	2.38	15.91	5.1	32.66	8.32	7.21	20.57	7.36	0.87	3.8
Rarg	3	0.53	1.16476e-93	1.53213e-89	0.31	0.07	4.2	51.78	7.03	110.07	13.93	4.2	60.42	90.02	4.9	20.87	1.29	19.08	2.11	30.96	4.11	1.9	20.73	8.01	2.03	3.8
Trbc2	3	0.6	1.34308e-92	1.76668e-88	0.84	0.59	269.4	807.12	367.73	919.32	507.2	445.36	533.64	582.85	214.27	192.24	46.9	83.63	55.3	84.52	61.06	64.9	74.84	35.5	46.22	29.75
Itga4	3	0.57	8.58692e-92	1.12952e-87	0.56	0.4	223.91	209.18	147.74	421.62	169.95	207.81	129.1	272.04	197.45	171.75	46.6	43.67	33.68	56.43	35.74	50.75	34.34	21.43	45.06	30.38
Emp3	3	0.55	1.10123e-91	1.44856e-87	0.77	0.54	190.61	512.99	256.49	591.82	234.93	231.26	400.12	540.01	194.33	164.82	42.92	79.86	48.58	76.57	45.25	56.19	78.16	34.42	46.22	37.97
S1pr4	3	0.62	5.40686e-90	7.11218e-86	0.52	0.22	25.63	147.22	64.92	235.1	91.35	70.98	141.01	153.9	18.17	22.2	8.54	44.12	17.73	52.54	24.31	25.58	42.88	12.99	6.69	7.59
Kcnn4	3	0.51	5.42774e-89	7.13965e-85	0.54	0.21	46.1	175.52	45.6	198.45	60.41	34.71	95.57	140.33	69.6	42.92	12.12	51.51	13.36	54.23	15.36	12.93	34.65	14.07	16.86	8.23
Tnfaip8l2	3	0.53	7.26815e-88	9.56052e-84	0.46	0.18	22.6	127.98	33.04	169.79	45.9	34.04	99.54	149.36	11.38	39.58	7.75	41.78	11.17	46.45	14.26	14.01	37.5	12.99	4.65	9.49
Spn	3	0.55	4.61591e-87	6.07177e-83	0.52	0.23	48.48	110.6	77.05	211.14	63.62	80.06	126.4	144.35	49.19	43.51	15.15	35.44	20.49	51.86	17.09	27.76	41.61	12.34	15.7	13.92
Trac	3	0.54	9.33168e-87	1.22749e-82	0.62	0.37	107.35	162.43	119.86	324.76	126.89	163.05	279.61	223.48	146.21	87.9	30.15	42.91	31.01	62.18	30.62	47.21	67.72	18.83	40.7	20.25
2310001H17Rik	3	0.57	2.00867e-86	2.6422e-82	0.41	0.14	23.49	75.87	30.09	160.36	51.55	55.63	69.66	87.2	20.12	32.26	8.2	24.81	8.74	41.37	14.53	20.27	26.74	8.44	7.85	6.33
Ptpn6	3	0.53	1.66046e-83	2.18417e-79	0.4	0.12	10.4	118.35	17.04	140.79	18.22	12.07	53.1	119.07	23.44	87.78	3.97	35.67	5.75	40.44	6.22	5.85	21.52	10.17	7.85	10.76
Flna	3	0.53	7.68526e-82	1.01092e-77	0.64	0.38	124.76	226.24	128.08	348.46	177.2	149.33	149.8	307.84	118.05	177.32	31.59	55.28	30.61	63.87	37.93	43.13	44.62	22.51	31.1	31.01
Vsir	3	0.51	1.53968e-81	2.0253e-77	0.5	0.21	47.5	122.37	50.3	186.59	57.04	44.58	128.56	134.13	41.66	51.96	14.26	39.06	14.9	50.42	16.91	17.82	41.77	11.9	13.66	14.56
Lfng	3	0.52	1.65562e-80	2.17781e-76	0.44	0.15	16.63	131.68	25.08	153.13	26.51	23.89	98.23	120.19	9.61	20.33	5.22	41.03	7.61	44.25	7.13	8.84	34.49	11.26	3.49	5.7
Pglyrp1	3	0.56	1.18918e-79	1.56424e-75	0.62	0.23	59.89	55.61	34.27	296.96	52.04	148.28	818.6	160.63	17.57	69.54	17.44	19.31	8.83	61.51	14.99	42.31	85.6	14.07	6.1	15.82
S1pr1	3	0.52	7.22905e-75	9.50909e-71	0.52	0.24	29.28	331.94	57.57	272.85	230.93	27.92	41.42	221.19	6.72	40.25	8.3	68.25	14.41	52.12	40.59	9.25	11.23	15.58	2.33	8.23
Sash3	3	0.52	1.49592e-72	1.96773e-68	0.57	0.26	24.72	184.58	58.51	228.94	77.5	64.34	225.3	188.32	40.06	103.12	8.79	54.07	17.17	57.36	21.94	23.81	60.44	17.32	14.24	17.09
Def6	3	0.5	3.01641e-67	3.96778e-63	0.54	0.22	23.3	155.79	50.52	187.36	59.9	49.38	157.55	125.25	35.28	21.65	8.49	46.38	14.74	53.72	17.82	18.64	51.74	12.34	12.79	7.59
2810474O19Rik	3	0.51	7.41125e-66	9.74876e-62	0.6	0.34	85.32	340.1	120.59	336.06	147.11	97.14	198.3	263.36	74.42	87.1	24.04	65.16	27.29	59.56	31.08	30.61	49.84	21.21	18.6	16.46
Tcf7	3	0.51	3.80597e-63	5.00637e-59	0.44	0.18	14.61	348	14.89	218.93	105.67	9.64	7.52	199.47	1.72	27.84	4.72	67.95	3.08	43.99	23.58	3.4	1.74	14.29	1.16	5.06
Ifi27l2a	3	0.53	7.88261e-54	1.03688e-49	0.89	0.67	376.66	764.09	434.24	1711.94	771.12	1047.41	4766.47	1420.72	166.13	463.66	54.5	81.98	54.33	88.58	69.1	87.89	96.2	59.09	38.95	53.16
Nrn1	3	0.53	2.57986e-39	3.39354e-35	0.16	0.04	9.85	10.23	5.15	98.94	7.21	6.46	88.25	50.42	4.88	1.74	2.93	3.39	1.54	16.5	1.28	2.04	18.35	3.46	2.33	0.63
Trbv19	3	0.52	1.48503e-19	1.95341e-15	0.11	0.07	34.49	111.53	36.89	177.17	91.1	81.06	68.3	99.57	2.22	40.3	5.27	8.97	5.18	10.74	9.6	10.61	6.33	6.71	0.58	5.06
Trbv13-2	3	0.59	1.73575e-16	2.2832e-12	0.27	0.15	55.56	212.76	59.51	288.98	111.79	67.39	261.97	255.98	19.57	6.04	11.38	23.15	11.17	27.41	16.09	12.93	25.95	14.94	5.23	2.53
Ccr7	4	1.35	2.02407e-197	2.66247e-193	0.58	0.24	108.78	365.58	109.58	84.73	1053.93	724.69	18.75	204.09	6.84	177.9	10.98	67.27	12.55	19.54	58.23	41.09	3.16	15.15	2.33	12.66
Vps37b	4	0.63	1.00823e-153	1.32622e-149	0.97	0.68	2075.26	152.63	2225.43	80.39	2306.72	1820.2	364.13	178.85	1392.55	1359.48	94.83	44.19	95.38	22.84	97.07	97.69	63.29	11.26	89.83	65.19
Gramd3	4	0.86	3.00876e-147	3.95772e-143	0.52	0.19	138.54	58.16	49.07	35.51	312.02	133.51	21.72	26.26	7.94	105.03	28.66	20.44	12.63	13.03	52.38	38.5	9.49	2.38	2.91	21.52
Socs3	4	1.05	3.19197e-125	4.19872e-121	0.58	0.31	142.23	202.93	220.07	119.16	642.84	172.23	95.13	97.32	110.59	296.48	24.89	42.68	36.68	29.36	58.23	41.09	25.95	8.01	24.42	36.71
Tcp11l2	4	0.67	3.87685e-101	5.0996e-97	0.62	0.37	125.77	103.98	320.15	116.08	399.29	209.05	104.26	104.24	106.23	198.2	31.2	33.33	56.03	35.36	61.79	51.16	36.23	8.23	29.65	36.71
Tmem64	4	0.67	9.52549e-96	1.25298e-91	0.79	0.56	533.39	185.6	1060.54	155.5	953.36	416.23	134.77	200.19	503.19	483.42	65.38	46.76	84.62	38.32	79.07	62.72	36.87	15.58	65.41	43.67
Arid5a	4	0.72	4.18752e-93	5.50827e-89	0.46	0.22	78.03	65.84	125.06	53.24	262.74	63.14	81.22	74.43	50.16	76.58	20.37	23	29.31	19.97	45.89	20.95	28.48	7.14	16.86	16.46
Stat5b	4	0.59	5.56591e-83	7.32139e-79	0.69	0.45	254.38	131.65	315.25	151.85	454.76	306.86	103.37	112.77	130.99	206.39	50.57	42.08	55.71	43.32	68.74	64.76	31.65	10.61	32.56	39.24
Cblb	4	0.58	9.54709e-80	1.25582e-75	0.65	0.44	202.75	146.07	279.97	109.8	427.51	321.56	200.74	124.34	140.01	189.31	44.06	43.74	51.58	34.18	64.99	64.76	53.96	11.47	35.47	33.54
Ssh2	4	0.59	8.45565e-70	1.11226e-65	0.54	0.32	93.2	154.51	186.52	122.08	301.1	123.36	70.05	99.42	54.54	158.13	24.84	45.78	42.35	34.6	54.11	35.37	25.16	9.09	18.02	27.22
Lrig1	4	0.55	5.0592e-63	6.65487e-59	0.37	0.16	65.37	79.19	56.35	68.15	175.14	59.21	3.91	56.9	10.57	56.49	16.34	26.77	13.68	18.78	36.84	20.68	1.58	5.41	3.49	12.66
Cenpa	4	0.57	1.92709e-61	2.5349e-57	0.47	0.28	143.68	34.99	192.69	72.48	289.49	209.28	113.36	86.85	70.2	140.07	31.54	13.12	36.84	23.86	47.44	47.76	32.91	7.79	20.93	27.22
Irf1	4	0.56	6.11841e-58	8.04815e-54	0.67	0.5	305.71	194.63	325.27	214.21	599.06	404.62	583.64	194.07	251.93	346.43	49.43	45.4	49.23	45.52	67.18	65.17	73.89	16.02	50	44.94
Pja1	4	0.56	5.26176e-55	6.92132e-51	0.36	0.19	73.27	51.22	86.67	48.94	193	113.8	63.65	38.43	49.47	70.01	18.28	18.55	20	17.6	35.92	31.43	22.78	3.9	17.44	15.82
Jun	4	0.63	3.56214e-38	4.68563e-34	0.54	0.38	161.05	297.69	588.3	153.51	623.44	273.4	401.62	116.98	246.25	500.24	28.71	52.19	50.53	28.6	53.93	36.73	52.69	9.96	38.37	32.28
Gadd45g	4	0.56	2.99654e-28	3.94164e-24	0.2	0.09	76.74	28.13	48.72	14.22	160.68	40.96	55.34	12.82	74.99	153.35	12.37	4.68	9.15	3.98	19.93	10.88	18.2	0.87	13.66	16.46
Got1	5	0.86	8.37995e-177	1.1023e-172	0.91	0.46	643.05	21.48	1107.51	31.24	684.18	1227.78	265.88	43.04	393.88	646.84	65.92	8.37	78.54	12.52	67.92	91.29	51.11	4.98	50.29	55.7
Ubald2	5	0.68	4.98195e-168	6.55325e-164	0.98	0.7	2015.77	128.79	1746.52	121.17	1613.73	2249.54	443.99	109.05	1277.86	1155.78	93.79	41.86	91.9	38.07	89.58	97.55	74.21	9.31	84.88	64.56
Icos	5	0.81	2.46924e-164	3.24804e-160	0.96	0.63	792.89	46.13	1701.83	388.88	786.94	1745.99	568.73	172.01	1253.11	996.42	76.15	13.95	93.12	61.51	71.21	95.78	75.95	13.42	86.92	58.86
Fth1	5	0.61	2.61829e-158	3.4441e-154	0.99	0.96	3983.07	1186.99	5500.88	1359.07	3624.64	5988.96	2849.77	1144.02	3733.08	8914.74	99.25	97.66	99.03	97.46	98.35	99.18	99.37	55.19	99.71	99.37
Hopx	5	0.9	7.64449e-158	1.00556e-153	0.97	0.7	2841.93	160.9	1281.34	266.05	869.08	3260.11	419.28	203.97	3874.66	1148.42	94.88	44.87	78.54	55.08	72.76	96.6	76.27	16.88	94.19	58.23
Itgae	5	0.95	2.62963e-153	3.45901e-149	0.6	0.14	100.86	4.14	64.97	61.78	61.56	314.53	24.25	41.63	81.5	89.27	24.74	1.36	15.87	12.35	14.81	60.14	6.8	4.33	19.77	17.09
Dgat1	5	0.7	5.49739e-143	7.23126e-139	0.91	0.5	801.93	15.27	774.36	35.14	496.62	967.93	310.76	32.39	495.32	627.11	82.66	5.51	77.89	11.93	61.97	91.02	59.34	3.9	72.97	55.06
Stat1	5	0.88	6.24049e-136	8.20875e-132	0.89	0.55	583.92	410.94	258.45	387.43	514.4	1224.28	678.17	292.16	237.73	494.66	57.72	60.71	39.6	60.24	55.85	88.84	81.8	21.65	44.48	44.94
Ctla4	5	0.66	9.25803e-131	1.2178e-126	0.99	0.81	1061.06	395.23	3117.95	761.99	1605.3	2644.34	1367.56	475.9	1817.71	1486.63	84.55	64.03	96.68	82.4	91.04	98.91	89.87	32.9	95.64	63.92
Ier5l	5	0.8	9.54165e-128	1.25511e-123	0.62	0.19	187.72	0.32	311.71	14.03	128.99	384.18	30.09	22.55	58.45	145.23	30.2	0.23	44.05	3.55	21.94	62.45	10.44	1.52	14.53	22.15
Ccl5	5	0.83	1.35872e-127	1.78726e-123	0.58	0.14	129.21	6.93	125.29	363.21	226.87	1309.71	4963.95	150.91	5.39	358.31	13.07	0.68	7.29	14.13	11.61	58.37	74.21	4.55	1.74	20.25
Pqlc1	5	0.76	2.17049e-116	2.85506e-112	0.58	0.16	118.51	6.64	135.31	5.91	42.63	260.85	14.36	4.71	263.64	92.44	28.66	2.56	26.88	2.45	11.97	58.23	6.65	0.65	56.4	21.52
Traf4	5	0.72	6.02929e-115	7.93092e-111	0.59	0.2	156.32	38.66	74	20.25	109.84	270.37	41.99	18.71	66.48	119.72	35.12	15.08	18.46	7.36	22.85	59.05	16.46	1.95	18.9	23.42
Coq8a	5	0.75	1.02471e-111	1.34791e-107	0.58	0.18	182.89	6.73	59.32	15.2	85.99	264.24	25.05	11.9	47.16	80.66	41.18	3.02	15.47	6.68	20.48	57.96	9.97	1.3	15.41	18.99
Gna13	5	0.53	3.26731e-108	4.29783e-104	0.94	0.64	848.3	82.4	1198.5	131.85	930.55	1104.54	346.34	120.69	897.96	665.88	85.35	27.83	89.88	37.73	83	93.47	68.67	10.39	85.76	63.92
Stat3	5	0.63	4.02404e-104	5.29322e-100	0.91	0.64	881.79	191.35	555.78	179.64	508.71	1014.24	374.97	135.12	936.12	467.72	79.43	52.87	69.07	50.42	69.1	91.29	71.04	11.04	84.88	56.33
Mrps6	5	0.75	4.2766e-104	5.62544e-100	0.62	0.25	105.71	39.71	136.71	80.43	112.38	306.92	70.56	44.21	123.19	99.69	28.22	16.06	30.69	26.06	25.32	61.77	27.22	4.55	31.98	20.25
Rgs2	5	0.64	7.19791e-104	9.46813e-100	0.84	0.46	1135.64	24.47	503.08	72.01	615.73	1028.94	289.23	47.41	562.25	540.34	83.16	7.99	51.66	18.78	59.05	83.54	54.27	3.68	51.74	47.47
Ly75	5	0.75	1.1103e-99	1.46049e-95	0.45	0.12	71.66	27.75	19.34	40.52	23.47	196.94	45.79	15.47	44.02	52.15	17.04	11.09	5.83	15.57	7.95	45.03	18.83	1.95	13.95	8.86
Il1r2	5	1.03	3.14823e-99	4.14118e-95	0.4	0.08	54.13	0.35	34.53	17.41	23.62	287.74	148.73	2.41	21.69	160.66	11.08	0.15	8.1	5.16	5.85	40	29.27	1.08	4.36	22.78
Tnfrsf4	5	0.57	2.76364e-98	3.63529e-94	0.97	0.74	3258.56	129.32	1339.08	656.82	1249.44	2757.68	1378.85	253.56	3236.8	1209.48	98.31	32.28	88.1	66.07	84.37	97.28	91.77	18.61	89.53	60.13
Gem	5	0.91	1.37884e-96	1.81373e-92	0.58	0.21	297.71	5.28	131.38	17.98	206.75	491.3	153.21	9.55	105.36	138.7	38.2	1.81	20.73	5.75	30.07	57.82	33.39	0.87	20.64	20.89
Tmem158	5	0.88	9.54929e-94	1.25611e-89	0.44	0.11	181.14	18.85	11.65	23.03	37.91	294.18	51.89	27.61	18.16	73.7	25.14	7.16	3.08	6.43	7.22	43.81	13.77	1.95	4.94	10.13
Ccr5	5	0.79	5.27346e-88	6.93671e-84	0.45	0.11	18.75	0.79	122.81	9.14	43.39	221.35	159.13	18.95	30	95.66	6.01	0.23	25.51	3.38	10.88	44.76	40.66	2.38	8.72	18.35
Dusp4	5	0.53	1.55934e-85	2.05115e-81	0.79	0.39	423.61	15.23	630.02	19.95	305.22	536.3	112.74	15.37	536.41	275.45	60.06	4.98	73.36	8.21	46.98	78.78	35.44	1.95	70.64	38.61
Sla	5	0.58	5.88626e-85	7.74278e-81	0.87	0.57	400.85	106	492.8	287.96	401.39	673.92	337.39	158.21	372.09	422.12	65.67	32.96	68.26	62.69	60.24	86.8	69.46	13.64	64.24	55.7
Itgav	5	0.53	1.07198e-84	1.41008e-80	0.85	0.5	709.38	24.54	495.2	83.69	292.56	647.03	199.4	46.28	529.49	388.86	82.22	10.33	69.15	27.16	46.98	85.44	54.59	5.84	71.22	53.16
Ttc39c	5	0.63	7.80349e-84	1.02647e-79	0.61	0.23	164.77	1.39	111.64	47.73	64.8	263.67	98.14	58.58	258.6	128.47	39	0.53	26.15	18.02	17.55	60.95	32.59	5.19	53.78	27.85
Snx18	5	0.51	3.56421e-83	4.68836e-79	0.83	0.49	497.3	49.84	350.28	65	462.4	533.89	176.01	39.94	290.2	271.47	75.46	17.87	60.24	23.01	68.56	82.59	50.63	4.55	62.79	44.94
Lag3	5	0.78	6.58542e-78	8.66246e-74	0.5	0.14	39.04	8.51	126.87	64.08	27.03	289.31	305.08	21.79	255.96	93.96	9.99	2.41	21.78	14.97	5.94	49.93	46.04	1.95	44.19	17.72
Slc3a2	5	0.53	8.76815e-76	1.15336e-71	0.81	0.52	433.04	72.43	537.6	103.48	418.57	594.55	225.22	68.04	427.94	373.07	67.46	27.07	70.45	35.11	62.34	80.68	54.75	8.23	65.12	48.1
Tnfrsf1b	5	0.55	1.2327e-73	1.6215e-69	0.83	0.48	378.76	39.16	422.48	210.82	272.8	536.77	190.55	68.13	485.12	278.69	63.93	13.5	63.56	47.04	48.54	82.59	54.59	7.36	72.97	44.3
Nfil3	5	0.51	5.87335e-70	7.72581e-66	0.73	0.38	306.22	8.89	529.89	44.73	319.4	454.12	182.97	42.05	275.83	323.2	53.45	2.26	69.23	14.97	46.44	73.33	47.31	3.9	52.33	45.57
Capg	5	0.59	3.37526e-68	4.43981e-64	0.85	0.57	300.17	130.15	511.45	397.73	262.44	723.51	782.93	385.56	382.89	265.62	57.72	35.37	70.61	65.99	46.25	85.44	88.92	28.35	66.86	43.04
Mxd1	5	0.55	1.14694e-67	1.50869e-63	0.72	0.4	374.01	55.15	293.75	37.02	359.79	469.33	243.54	53.34	250.8	293.07	56.73	16.21	50.85	13.28	58.04	71.84	51.11	4.33	43.02	45.57
Thap12	5	0.59	1.01061e-64	1.32936e-60	0.46	0.17	68.3	34.89	74.48	34.86	67.88	181.43	52.74	41.19	65.69	65.57	19.57	14.18	19.84	13.87	18.1	45.85	20.57	3.25	20.06	12.66
Lamc1	5	0.54	2.30225e-64	3.02838e-60	0.58	0.26	165.76	7.24	210.77	37.08	102.42	251.07	65.69	18.49	173.32	114.14	40.29	2.56	45.59	13.62	24.5	58.5	24.37	1.73	40.99	24.68
Fam46a	5	0.54	4.06396e-63	5.34573e-59	0.73	0.41	1200.52	26.11	419.14	48.3	285.4	855.34	172.98	31.29	969.65	453.15	81.82	7.84	44.37	14.38	37.39	72.79	36.87	2.6	84.88	39.24
Lin54	5	0.52	8.31881e-63	1.09426e-58	0.44	0.15	95.82	15.87	72.96	10.8	60.95	156.24	27.16	10.98	84.36	69.9	24.99	6.49	19.84	4.15	15.27	43.95	11.71	1.3	23.26	15.19
Lmnb1	5	0.53	1.2411e-62	1.63255e-58	0.76	0.47	518.84	41.34	381.38	85.48	303.48	550.2	202.34	113.92	470.23	320.27	72.18	16.59	60.89	29.7	47.71	76.33	50.16	10.82	68.02	42.41
Maf	5	0.54	2.70226e-59	3.55456e-55	0.78	0.46	252.61	29.75	781.68	248.3	319.91	605.16	248.52	143.28	518.71	437.78	48.53	6.56	81.62	50.68	44.61	78.1	58.39	12.12	70.35	53.8
Stat5a	5	0.52	5.96402e-58	7.84508e-54	0.52	0.26	161.15	56.08	121.89	52.76	153.58	243.3	46.15	48.44	83.72	128.22	35.02	21.42	29.15	18.87	38.03	52.11	18.51	4.11	21.51	26.58
Lrrc32	5	0.53	1.02738e-57	1.35142e-53	0.52	0.23	170.94	64.52	75.2	46.39	239.8	259.55	87.98	47.16	7.46	105.43	33.28	18.1	14.9	12.61	41.41	52.52	24.21	3.9	3.2	19.62
Itpk1	5	0.51	1.82151e-53	2.39601e-49	0.48	0.19	92.86	30.74	55.46	55.09	69.25	173.46	62.69	42.29	84.13	87.61	24.69	12.22	16.84	20.14	20.38	48.44	26.27	4.55	22.38	16.46
Serpina3g	5	0.52	1.68484e-52	2.21624e-48	0.42	0.14	18.07	13.75	68.89	74.04	84.91	190.32	401.75	45.17	2.13	104.51	5.46	3.09	15.14	16.16	16.36	41.63	59.97	4.33	0.87	16.46
Tff1	5	0.66	4.08546e-51	5.37402e-47	0.18	0.02	29.78	0	14.99	0	4.36	116.7	4.73	0.61	47.91	16.47	4.77	0	3	0	1.1	17.55	2.53	0.22	4.94	3.16
Slc16a3	5	0.55	7.7723e-50	1.02237e-45	0.27	0.06	17.24	3.9	23.9	6.03	27.47	108.45	91.46	4.94	12.26	33.1	5.76	1.58	6.15	2.62	8.68	27.35	27.37	0.65	3.78	10.13
Gzmb	5	0.55	2.61872e-45	3.44467e-41	0.46	0.19	315.97	3.37	1199.32	46.2	142.47	1017.84	1335.8	41.37	3918.16	530.06	17.09	0.38	39.27	4.74	11.61	46.39	54.11	3.46	54.94	18.99
Ccr7	5	0.82	2.13814e-39	2.81251e-35	0.41	0.27	108.78	365.58	109.58	84.73	1053.93	724.69	18.75	204.09	6.84	177.9	10.98	67.27	12.55	19.54	58.23	41.09	3.16	15.15	2.33	12.66
Igtp	5	0.5	3.22007e-37	4.23568e-33	0.52	0.29	114.07	138.67	99.01	97.33	189.06	281.2	216.76	125.39	77.79	128.51	27.32	35.97	22.02	26.82	35.83	52.38	48.26	10.39	20.06	23.42
Litaf	5	0.59	5.27822e-36	6.94297e-32	0.36	0.15	80.97	11.61	92.31	25.3	37.33	206.04	241.84	17.09	27.89	322.72	16.44	3.7	17.98	10.41	7.77	35.78	54.75	2.6	8.43	35.44
Ly6a	6	1.92	0	0	0.94	0.32	117.73	256.34	308.73	285.57	125.48	464.87	2203.64	278.15	237.1	225.75	19.37	42.01	44.53	31.73	19.2	58.37	94.46	19.26	32.27	27.85
AW112010	6	1.77	0	0	0.97	0.6	277.42	328.91	511.58	948.63	348.87	1129.59	3539.25	665.08	293.99	624.38	45.8	63.42	61.7	85.28	49.27	87.62	96.99	36.8	55.52	54.43
Ifi27l2a	6	1.7	0	0	0.96	0.68	376.66	764.09	434.24	1711.94	771.12	1047.41	4766.47	1420.72	166.13	463.66	54.5	81.98	54.33	88.58	69.1	87.89	96.2	59.09	38.95	53.16
Aldoa	6	1.31	0	0	0.97	0.74	722.79	307.45	544.53	495.92	464.79	920.92	2473.63	396.36	1412.49	503.18	82.12	70.06	74.66	80.88	64.35	88.44	96.99	28.57	96.51	60.13
Gapdh	6	1.19	0	0	1	0.96	2076.46	1046.78	2723.95	1609.52	2250.19	3346.22	7028.34	1648.94	2248.71	2196.55	97.57	96.53	98.7	97.12	96.89	98.5	99.53	66.23	98.84	86.08
Pkm	6	1.18	0	0	0.96	0.71	423.83	344.49	462.79	500.48	454.71	743.68	1729.22	441.83	487.02	374.07	70.29	75.04	69.39	82.23	65.27	85.71	96.36	32.47	76.74	58.23
Pglyrp1	6	1.53	0	0	0.86	0.24	59.89	55.61	34.27	296.96	52.04	148.28	818.6	160.63	17.57	69.54	17.44	19.31	8.83	61.51	14.99	42.31	85.6	14.07	6.1	15.82
Tpi1	6	1.57	5.62194e-299	7.3951e-295	0.77	0.2	57.71	28.36	70.34	80.09	72.78	178.72	727.5	76.17	70.46	107.44	17.98	11.92	18.79	27.16	18.56	43.4	76.74	7.79	22.97	22.78
Pgk1	6	1.31	1.12792e-295	1.48367e-291	0.8	0.33	125.86	82.65	126.58	104.35	101.64	216.81	719.24	139.84	122.73	130.82	33.68	29.64	32.96	34.94	27.61	53.88	79.59	12.12	36.63	22.78
Ccl5	6	2.65	8.72146e-270	1.14722e-265	0.74	0.13	129.21	6.93	125.29	363.21	226.87	1309.71	4963.95	150.91	5.39	358.31	13.07	0.68	7.29	14.13	11.61	58.37	74.21	4.55	1.74	20.25
Nkg7	6	1.98	2.78231e-241	3.65984e-237	0.64	0.07	18.7	6.32	46.53	54.26	31.8	62.52	960.34	35.63	395.08	9.6	3.58	1.36	7.94	7.87	5.03	12.52	63.77	2.81	46.22	2.53
Cd3g	6	0.89	2.44516e-204	3.21636e-200	0.96	0.79	450.99	692.29	563.1	1266.99	523.69	742.26	1790.42	924.38	541.51	364.62	72.58	90.8	77.73	95.18	72.58	89.12	96.52	50	78.49	50
Rgs16	6	1.32	2.99603e-182	3.94098e-178	0.55	0.08	51.02	12.13	30.35	58.11	32.49	38.46	410.56	11.43	26.29	25.12	11.08	3.39	7.37	13.11	7.68	10.88	54.75	0.87	4.36	6.96
Fxyd5	6	0.74	3.43455e-182	4.51781e-178	0.98	0.85	641.44	830.89	813.43	1205.97	710.02	1011.09	1851.61	912.79	609.41	650.69	81.17	93.82	84.78	95.69	80.26	93.74	97.63	49.57	83.72	64.56
Cd3d	6	0.79	1.43391e-171	1.88616e-167	0.94	0.74	334.91	679.98	387.12	962.8	473.05	610.24	1328.18	792.85	411	245.32	65.23	90.35	65.51	93.06	69.74	86.8	93.99	47.84	75.87	41.14
Eno1	6	0.93	3.36235e-171	4.42284e-167	0.86	0.49	141.36	352.77	189.07	309.61	170.67	280.66	739.17	358.06	123.21	190.64	37.36	72.02	42.27	67.34	40.04	62.45	86.23	27.06	34.59	32.91
Lgals1	6	1.1	1.17658e-170	1.54768e-166	0.96	0.62	518.12	162.86	856.55	662.35	454.76	797.56	1922.23	776.1	820.91	500.82	66.42	38.31	79.27	67.6	50.27	81.77	95.57	41.56	81.98	55.7
Isg20	6	1.01	1.10139e-169	1.44877e-165	0.6	0.13	30.28	41.97	37.29	46.82	22.98	58.78	282.1	54.49	37.59	41.4	10.33	14.25	11.66	19.12	7.59	22.99	60.44	5.41	12.79	8.86
Anxa2	6	1.15	3.35716e-163	4.41601e-159	0.72	0.23	89.95	16.29	181.49	134.64	75.52	123.67	537.45	112.11	117.71	114.33	20.62	5.66	38.3	30.96	18.37	32.65	71.68	10.17	26.45	22.15
Sdf4	6	0.86	2.94513e-157	3.87403e-153	0.94	0.69	543.05	231.66	402.44	428.51	378.68	790.4	1173.84	306.88	481.79	346.59	77.1	62.37	68.42	75.63	64.44	87.07	93.67	22.94	75.87	50.63
Higd1a	6	0.9	1.73854e-147	2.28687e-143	0.68	0.24	54.66	66.19	79.98	99.84	67.2	109.23	325.02	51.52	58.49	61.61	18.18	26.32	21.78	35.53	20.02	36.46	68.51	6.71	20.64	14.56
Serpina3g	6	1.15	4.25187e-142	5.59291e-138	0.6	0.12	18.07	13.75	68.89	74.04	84.91	190.32	401.75	45.17	2.13	104.51	5.46	3.09	15.14	16.16	16.36	41.63	59.97	4.33	0.87	16.46
Gpi1	6	0.71	5.63182e-138	7.4081e-134	0.92	0.68	340.98	294.47	388.44	372.43	387.58	470.91	841.73	295.16	372.91	401.14	65.82	72.47	66.64	74.53	67.28	80.54	92.09	23.59	73.26	58.86
Cxcr6	6	1.22	9.06421e-137	1.19231e-132	0.57	0.15	147.83	0.44	146.88	32.79	13.72	106.06	499.59	8.64	106.05	78.77	27.02	0.23	28.26	6.51	3.75	24.9	57.44	1.52	21.22	13.92
Clic1	6	0.72	1.44412e-134	1.89959e-130	0.93	0.64	245.76	441.91	288.32	661.23	267.5	393.15	868.82	564.4	248.07	306.96	54.05	82.65	55.63	88.75	51.01	76.73	92.88	36.15	57.85	52.53
Ramp1	6	0.91	3.15539e-131	4.1506e-127	0.54	0.1	8.76	69.35	42.29	69.03	21.88	8	237.46	61.26	5.79	13.72	2.78	24.13	11.09	19.37	6.67	2.72	53.48	4.98	2.33	4.43
Pgam1	6	0.9	1.36481e-130	1.79527e-126	0.58	0.2	50.32	40.86	65.1	83.35	39.12	80.9	289.37	54.11	78.75	79.45	17.14	15.84	19.11	31.56	13.16	29.39	58.39	6.28	26.45	17.09
Lgals3bp	6	0.84	4.59839e-129	6.04873e-125	0.5	0.08	10.76	30.85	10.74	57.15	13.04	13.89	184.97	41.81	2.72	40.94	3.97	12.52	3.64	19.88	4.94	6.94	49.84	4.33	1.16	9.49
Rtp4	6	0.88	8.15656e-127	1.07291e-122	0.46	0.06	7.15	51.78	6.35	35.72	27.8	13.22	195.51	38.47	0	11.84	1.79	14.78	2.02	11.42	6.86	4.08	45.57	3.25	0	3.16
Ldha	6	0.76	1.89465e-126	2.49222e-122	0.95	0.76	559.92	504.58	724.33	558	710.75	890.55	1445.31	533.11	568.81	547.74	73.37	84.01	78.7	81.64	74.13	88.71	95.09	34.2	74.71	59.49
Cxcr3	6	0.91	6.45676e-124	8.49322e-120	0.6	0.12	9.31	8.75	111.62	142.16	64.89	83.64	295.61	80.23	4.74	20.46	2.48	2.34	22.43	25.04	14.99	22.04	60.28	7.79	1.45	6.33
Glrx	6	0.93	4.54763e-121	5.98196e-117	0.82	0.37	225.21	27.41	339.28	180.97	189.92	373.97	675.78	133.64	179.85	234.92	42.92	10.41	51.74	43.06	31.54	62.04	81.96	11.04	36.05	36.08
S100a10	6	0.76	3.15926e-120	4.15569e-116	0.98	0.79	779.88	449.87	1133.26	1761.5	615.23	1020.63	2155.25	1468.09	877	497.72	77.65	78.43	87.29	94.16	63.62	89.52	97.78	56.06	83.72	48.73
Bnip3	6	0.86	7.43235e-118	9.77652e-114	0.33	0.03	5.55	9.14	10.72	9.76	6.04	19.21	156.66	8.73	7.76	16.55	2.04	3.39	3.56	4.4	2.47	8.16	33.23	0.87	3.2	3.8
Psmb8	6	0.7	8.76215e-116	1.15257e-111	0.93	0.59	170.49	558.17	226.12	615.36	214.81	328.96	791.43	554.42	169.7	424.63	43.52	85.9	48.02	86.55	45.8	69.25	92.56	36.8	44.19	54.43
Ltb	6	0.82	6.40163e-115	8.4207e-111	0.95	0.67	417.57	1002.43	397.34	1235.53	459.08	560.53	1600.09	839.93	143.3	393.07	58.42	91.93	53.85	90.52	58.23	74.56	94.78	46.54	29.65	47.47
Ctsd	6	0.77	3.30068e-114	4.34171e-110	0.67	0.29	58.47	132.88	93.41	152.31	68.65	80.25	328.18	128.34	87.91	221.28	19.03	44.12	27.45	45.6	21.02	29.8	67.41	12.77	26.16	30.38
Pld3	6	0.69	8.09032e-111	1.0642e-106	0.69	0.24	69.89	60.24	89.18	127.98	73.76	67.89	266.77	112.71	95.49	143.38	21.61	20.81	24.37	39.59	20.66	24.9	69.3	10.82	27.91	21.52
Mif	6	0.81	1.40769e-110	1.85168e-106	0.86	0.58	283.92	292.17	312.63	291.85	329.58	534.01	829.26	248.53	244.24	314.62	55.74	64.56	57.41	62.44	57.04	75.65	86.08	19.48	51.74	50
Bst2	6	0.8	2.1285e-107	2.79983e-103	0.61	0.23	61.76	111.33	60.51	101.73	67.79	76.85	301.61	97.25	58.84	163.22	19.97	32.96	17.41	31.64	18.65	26.8	61.23	9.09	20.35	20.25
H2-T22	6	0.65	4.19913e-106	5.52354e-102	0.85	0.54	204.11	319.39	182.03	273.92	273.13	337.68	571.81	271.44	176.33	211.57	47.29	71.64	42.19	65.06	53.2	70.2	85.13	24.24	45.35	37.97
Cd52	6	0.73	9.48285e-106	1.24737e-101	0.98	0.87	1081.26	1447.3	863.45	2015.27	722.33	1031.38	2657.83	1670.81	1382.68	1207.06	87.43	95.48	82.35	95.6	73.49	91.56	97.94	70.35	90.41	77.22
Sh3bgrl3	6	0.56	6.24853e-105	8.21931e-101	0.96	0.86	800.39	820.53	844.83	986.13	637.78	796.61	1554.83	967.31	1193.85	1034.9	86.19	92.38	85.75	93.4	76.23	89.39	96.52	53.03	92.73	81.65
Zbp1	6	0.84	1.25475e-101	1.65049e-97	0.55	0.14	17.46	77.95	27.87	71.24	51.22	58.02	241.8	81.73	13.67	48.68	6.11	24.59	8.26	24.2	14.35	19.73	54.59	7.36	4.94	12.66
S100a11	6	0.71	5.78357e-101	7.60771e-97	0.96	0.69	841.43	106.59	969.27	1173.62	447.47	767.14	1593.6	674.71	964.38	934.5	82.81	29.49	84.53	87.14	53.56	83.27	96.04	36.8	89.53	68.35
Prelid1	6	0.65	1.59179e-100	2.09385e-96	0.82	0.49	170.46	198.89	221.18	240.12	191.31	279.18	490.69	241	167.9	168.18	44.26	55.73	49.31	61.51	43.69	67.48	81.65	17.53	42.73	36.08
Tbx21	6	0.52	1.79868e-95	2.36599e-91	0.29	0.02	3.62	0.69	12.73	14.1	7.18	21.81	81.08	5.92	7.17	2.17	0.89	0.15	3.4	4.57	1.28	5.99	28.8	0.65	1.74	0.63
Npc2	6	0.58	1.06246e-93	1.39757e-89	0.86	0.66	276.04	460.44	392.47	277.15	379.71	530.59	739.48	444.05	306.28	539.58	58.97	81.45	66.88	65.65	64.81	82.59	86.39	32.47	64.53	64.56
Impa2	6	0.73	1.46351e-89	1.9251e-85	0.5	0.12	36.29	8.75	39.17	29.84	49.22	84.12	184.5	27.8	37.13	55.83	11.82	3.54	11.26	11.93	14.72	27.76	49.53	2.6	11.92	10.76
Psmb9	6	0.68	1.04667e-88	1.37679e-84	0.77	0.37	85.31	204.15	91.84	208.72	130.36	224.61	390.29	229.49	60.18	244.06	24.49	54.37	24.45	56.18	31.54	54.42	76.74	20.13	20.06	39.24
Litaf	6	0.71	1.08714e-87	1.43002e-83	0.55	0.14	80.97	11.61	92.31	25.3	37.33	206.04	241.84	17.09	27.89	322.72	16.44	3.7	17.98	10.41	7.77	35.78	54.75	2.6	8.43	35.44
Fgl2	6	0.74	1.24996e-87	1.6442e-83	0.61	0.2	109.48	2.39	260.64	50.2	35.18	154.56	325.22	41.9	221.4	131.63	24.79	0.83	41.38	13.96	8.04	36.46	60.76	3.9	43.6	24.68
Ifi47	6	0.8	4.14712e-87	5.45513e-83	0.67	0.24	25.25	253.24	43.12	159.2	113.7	73.37	357.08	162.61	26.46	76.37	8	56.03	12.39	40.36	22.76	22.45	67.41	13.85	7.85	14.56
H2-T23	6	0.59	1.48211e-86	1.94957e-82	0.91	0.64	272.28	445.91	309.58	531.84	283.28	474.45	762.21	466.5	436.2	296.72	55.94	79.03	56.44	82.06	52.83	80.14	91.14	32.68	71.8	48.1
Arl6ip1	6	0.54	3.85773e-86	5.07446e-82	0.88	0.67	321.62	364.93	350.48	474.56	343.51	405.92	698.07	369.22	316.15	291.5	63.84	77.3	63.72	82.91	63.25	74.69	87.66	27.92	67.44	51.27
Hsp90aa1	6	0.66	4.45524e-85	5.86042e-81	0.81	0.66	582.09	211.02	921.74	247.5	690.05	514.8	1085.08	161	648.29	560.15	74.17	54	73.85	57.53	76.14	77.28	81.01	14.94	79.65	59.49
Dusp2	6	0.92	9.52955e-84	1.25352e-79	0.62	0.29	163.91	266.5	131.47	250.89	107.19	100.6	592.95	208.01	140.43	203.06	27.07	47.36	23.81	39.85	20.02	21.9	61.87	14.5	23.26	25.95
Xaf1	6	0.68	4.95778e-82	6.52147e-78	0.42	0.08	10.96	37.83	14.17	49.05	18.83	21.92	150.16	69.55	11.13	23.65	3.68	12.82	4.05	19.12	6.22	9.12	42.25	5.41	4.07	5.7
Ptprcap	6	0.69	3.15508e-80	4.15019e-76	0.91	0.61	207.73	596.71	238.2	998.01	198.13	516.88	975.13	718.95	280.09	203.1	46.15	87.33	46.8	91.96	38.12	79.46	91.14	43.72	56.4	36.08
Gmfg	6	0.67	7.81826e-80	1.02841e-75	0.84	0.46	196.57	202.54	117.1	340.94	212.34	299.48	513.96	244.28	76.76	195.49	45.16	52.56	29.07	66.07	45.61	66.39	83.54	20.13	20.06	34.81
Lgals3	6	0.77	8.92624e-79	1.17416e-74	0.44	0.09	25.18	2.08	66.14	43.15	30.13	66.85	215.98	72.75	33.01	525.49	7.4	0.45	14.82	10.49	7.22	16.87	43.51	6.93	11.34	36.71
Myl6	6	0.52	2.05092e-77	2.69778e-73	0.95	0.82	531.35	699.19	605.08	954.89	582.81	802.01	1210.88	877.23	574.83	770.45	78.29	91.93	77.89	93.06	75.59	90.61	95.25	48.27	82.27	71.52
Cks2	6	0.67	4.77157e-77	6.27652e-73	0.44	0.1	47.01	8.21	44.6	21.32	47.34	32.91	164.52	44.98	37.57	41.7	14.51	2.49	12.06	8.88	12.43	13.06	43.99	4.33	11.63	9.49
Rac2	6	0.53	3.60366e-76	4.74026e-72	0.98	0.88	684.14	1283.99	857.07	1674.66	877.12	1176.87	1862.55	1586.35	664.93	778.62	82.86	97.21	85.34	98.14	85.65	93.61	97.63	66.88	84.01	68.35
Capg	6	0.66	1.46697e-73	1.92965e-69	0.89	0.57	300.17	130.15	511.45	397.73	262.44	723.51	782.93	385.56	382.89	265.62	57.72	35.37	70.61	65.99	46.25	85.44	88.92	28.35	66.86	43.04
Slc2a1	6	0.59	1.77491e-73	2.33472e-69	0.43	0.13	46.07	33.19	43.95	32.03	34.43	42.88	149.7	27.59	55.27	12.69	15.25	13.42	13.04	12.69	10.42	16.19	43.2	4.11	17.44	4.43
Lcp1	6	0.54	1.36811e-72	1.79961e-68	0.95	0.76	454	548.97	520.61	954.95	473.43	633.06	1081.36	750.95	521.28	711.44	70.94	82.96	73.28	91.62	68.74	83.67	94.78	45.02	75	70.89
Pfn1	6	0.53	1.69099e-70	2.22433e-66	0.99	0.95	1273.4	3022.5	1476.9	3615.83	1449.98	2179.05	3704.45	3355.31	1434.45	1939.21	93.09	99.25	93.28	98.98	91.32	96.46	99.05	89.39	95.64	92.41
Bsg	6	0.55	4.20941e-70	5.53706e-66	0.7	0.41	140.17	127.72	156.02	166.53	124.75	177.05	323.4	131.56	137.75	93.71	40.19	43.74	41.78	51.18	33.91	54.56	70.25	14.72	42.44	25.32
Snx9	6	0.59	3.30458e-69	4.34684e-65	0.61	0.21	86.39	8.99	176.37	39.89	42.46	192.61	228.62	31.45	86.16	95.44	23.3	3.7	39.19	13.71	11.88	51.02	61.08	3.68	25.58	21.52
Grina	6	0.55	4.31108e-69	5.6708e-65	0.66	0.28	91.36	53.15	101.46	107.48	84.16	156.57	238.39	107.36	104.97	116.02	27.02	20.06	28.18	33.84	24.13	45.58	65.51	10.17	34.3	26.58
Pla2g16	6	0.62	1.98302e-68	2.60847e-64	0.7	0.3	71.95	81.05	116.55	143.76	85.02	174.92	273.01	93.81	64.93	93.06	23.5	30.17	31.58	45.69	24.59	48.71	70.25	9.31	20.64	20.89
Plin2	6	0.59	2.77332e-66	3.64802e-62	0.37	0.08	21.57	8.53	68.98	15.52	18.02	39.42	130.81	9.95	32.39	74.39	5.86	3.02	18.22	6.43	6.31	13.88	37.34	1.08	11.92	17.09
Tspo	6	0.56	6.29905e-65	8.28577e-61	0.83	0.49	145.69	217.96	201.4	384.7	171.48	205.4	450.11	266.53	176.06	201.83	39.24	58.07	46.72	75.21	41.22	55.1	82.91	21.65	48.26	39.24
Casp3	6	0.64	2.86282e-64	3.76575e-60	0.48	0.14	32.6	15.35	26.45	66.93	52.71	87.81	168.59	40.46	16.09	62.84	11.53	5.88	8.34	23.35	16	30.2	47.78	4.98	4.94	15.19
Plp2	6	0.58	9.48459e-64	1.2476e-59	0.55	0.2	61.79	44.63	99.21	63.88	50.16	75.36	194.49	67.26	70.53	45.2	19.42	16.67	26.56	22.84	14.72	28.71	54.59	7.14	21.22	12.03
Irf7	6	0.62	1.88374e-61	2.47787e-57	0.46	0.16	52.84	73.58	42.89	81.53	94.13	43	206.57	101.28	21	60.53	12.42	21.72	10.85	23.18	19.84	15.1	45.73	8.66	7.27	13.29
Crlf2	6	0.55	2.3088e-60	3.03699e-56	0.7	0.34	153.04	54.48	121.61	128.04	104.02	223.93	292.86	95.18	152.14	136.8	39.94	20.66	31.74	39.59	27.97	59.18	69.78	8.44	42.44	30.38
Gzmb	6	0.82	3.24969e-59	4.27464e-55	0.54	0.19	315.97	3.37	1199.32	46.2	142.47	1017.84	1335.8	41.37	3918.16	530.06	17.09	0.38	39.27	4.74	11.61	46.39	54.11	3.46	54.94	18.99
Txn1	6	0.56	3.6831e-59	4.84475e-55	0.73	0.42	183.73	101.95	192.16	155.97	141.69	246.3	374.99	170.33	170.64	374.67	43.96	35.82	42.83	46.28	34.28	59.73	73.1	13.64	47.09	48.73
Irf8	6	0.66	4.77397e-59	6.27969e-55	0.29	0.05	9.48	10.22	14.5	20.86	18.38	28.26	127.75	20.09	2.27	171.47	2.73	3.17	4.53	5.75	4.84	9.39	28.64	2.38	1.45	19.62
Fam162a	6	0.65	1.24088e-58	1.63225e-54	0.43	0.13	20.92	50.11	28.6	67.02	32.85	44.42	163.23	39.26	22.13	41.48	7.85	19.83	9.07	22.67	10.05	18.1	42.56	3.9	9.01	10.13
Egln1	6	0.56	1.95552e-55	2.5723e-51	0.45	0.18	41.8	72.68	43.66	71.93	40.21	59.41	170.55	74.6	63.98	16.9	13.36	26.7	13.28	26.31	13.07	22.18	45.41	8.01	21.51	6.33
Ifi213	6	0.5	2.87307e-55	3.77924e-51	0.36	0.08	7.62	59.58	10.55	60.61	31.14	9.1	114.66	72.34	3.22	7.16	2.29	19.76	2.91	18.61	7.95	2.59	35.92	6.06	1.16	2.53
Lamtor4	6	0.56	6.25734e-55	8.23091e-51	0.6	0.23	36.11	79.42	68.24	156.19	41.7	69.35	204.21	132.49	46.84	101.02	12.27	29.71	20.32	47.97	13.71	26.39	60.28	12.77	15.12	19.62
Selplg	6	0.5	1.32156e-54	1.73837e-50	0.89	0.63	256.77	545.13	338.7	610.17	402.79	481.86	747.59	568.79	153.53	294.63	50.17	85.52	58.14	78.43	62.16	76.73	89.24	37.88	40.7	43.67
Ndufv3	6	0.51	2.60573e-54	3.42758e-50	0.73	0.38	103.69	143.87	148.32	187.24	111.6	156.72	298.27	185.04	121.39	145.07	31.2	46.38	38.22	53.47	30.26	48.71	72.78	17.97	36.05	32.28
Ctsb	6	0.52	6.08948e-53	8.01011e-49	0.79	0.46	173.48	112.59	262.51	272.17	130.82	297.67	432.03	235.83	285.69	929.33	42.57	38.76	51.26	59.73	33.36	65.44	79.27	16.88	63.08	59.49
Unc119	6	0.55	1.26505e-51	1.66405e-47	0.53	0.18	43.81	23.83	68.15	92.53	44.83	84	170.9	63.31	59.82	47.46	15.5	9.65	19.76	31.73	14.72	29.93	53.16	7.36	20.35	12.03
S100a13	6	0.51	1.46397e-51	1.9257e-47	0.79	0.44	148.26	122.38	189.17	245.53	136.93	220.13	356.42	193.3	206.44	146.76	39.79	41.63	45.67	58.97	34.64	59.18	78.96	15.58	47.67	32.28
Cst7	6	0.64	1.45555e-50	1.91464e-46	0.52	0.18	43.45	25.97	53.15	157.22	33.37	105.85	214.08	55.33	127.07	48.12	14.31	9.28	16.03	36.89	10.33	33.61	52.06	6.28	33.14	14.56
S100a6	6	0.79	5.16103e-49	6.78883e-45	0.79	0.46	416.79	20.54	789.83	936.09	369.51	791.25	1327.93	948.55	702.08	511.44	49.63	4.15	66.32	59.14	32.91	68.71	78.64	38.96	70.06	43.04
Gimap5	6	0.51	2.70384e-45	3.55663e-41	0.73	0.43	184.67	147.91	148.67	309.15	223.13	243.58	394.28	177.7	141.39	128.39	38.75	43.67	33.52	63.37	45.43	56.05	73.26	15.58	31.69	24.68
Ccl3	6	0.84	5.55852e-45	7.31168e-41	0.14	0.01	6.56	0	6.73	2.73	3.95	6.9	153.14	6.85	2.97	242.22	1.79	0	1.62	0.42	1.01	2.04	13.61	0.22	0.87	19.62
Isg15	6	0.7	7.20893e-45	9.48263e-41	0.46	0.19	91.31	60.34	87.77	56.81	89.89	167.57	278.37	82.25	70.64	142.92	22.11	12.44	19.6	16.33	17.92	39.18	46.36	7.14	18.9	21.52
Glipr1	6	0.52	1.57452e-43	2.07113e-39	0.47	0.16	33.38	44.79	47.82	87.19	31.02	64.84	152.8	63.62	70.84	58.03	11.33	16.82	14.01	30.37	9.96	23.4	46.84	6.71	24.42	13.92
Gimap7	6	0.55	4.90637e-43	6.45384e-39	0.73	0.43	162.01	168.48	189.96	318.54	281.39	412.07	468.21	245.29	101.56	156.88	34.28	45.17	35.87	57.78	48.54	69.52	73.1	19.26	21.8	29.11
Ccr5	6	0.53	2.9759e-42	3.91449e-38	0.41	0.12	18.75	0.79	122.81	9.14	43.39	221.35	159.13	18.95	30	95.66	6.01	0.23	25.51	3.38	10.88	44.76	40.66	2.38	8.72	18.35
Lag3	6	0.82	7.69397e-42	1.01206e-37	0.46	0.15	39.04	8.51	126.87	64.08	27.03	289.31	305.08	21.79	255.96	93.96	9.99	2.41	21.78	14.97	5.94	49.93	46.04	1.95	44.19	17.72
Rilpl2	6	0.63	4.96937e-41	6.53671e-37	0.62	0.26	82.08	24.13	119.44	176	111.39	217.04	293.29	88.54	83.55	207.09	21.76	8.9	27.53	40.44	25.69	51.56	61.55	7.79	23.84	34.81
Plac8	6	0.77	4.06451e-39	5.34645e-35	0.19	0.03	32.1	1.57	24.84	2.13	20.15	107.36	179.5	45.49	25.96	137.57	3.78	0.38	2.83	0.59	2.29	10.75	18.67	2.81	4.07	10.76
Zyx	6	0.5	7.84993e-37	1.03258e-32	0.58	0.24	42.61	110.37	56	180.42	67.11	77.2	211.76	176.12	48.93	112.17	14.36	33.94	16.36	46.02	20.29	28.71	58.23	16.02	17.44	23.42
Ifit1	6	0.5	5.88457e-35	7.74056e-31	0.16	0.02	2.33	35.16	2.3	12.49	11.52	4.42	85.19	37.78	1.63	2.47	0.94	6.49	0.73	3.81	2.01	1.77	16.3	2.6	0.87	1.27
Ccl4	6	1.56	9.3549e-35	1.23054e-30	0.12	0.02	10.13	0	8.35	0.65	4.54	7.49	447.49	3.68	2.06	527.23	2.09	0	1.94	0.25	0.91	1.77	11.55	0.43	0.58	18.99
Phf11b	6	0.51	4.31421e-34	5.67491e-30	0.48	0.17	19.17	86.02	39.16	121.06	38.04	43.74	158.58	92.91	19.41	50.66	6.95	28.96	11.66	38.92	13.35	16.05	47.78	9.96	6.98	13.29
Gstp3	6	0.53	6.29132e-33	8.27561e-29	0.49	0.2	50.07	70.03	36.27	155.21	68.68	67.48	191.21	104.66	20.09	32.97	16.05	23.76	10.53	38.92	19.01	25.31	49.21	8.23	7.27	8.86
S100a4	6	0.5	5.12641e-29	6.74327e-25	0.63	0.3	139.85	9.52	248.81	540.89	111.62	179.31	400.5	354.03	105.19	277.68	31.99	1.51	46.15	46.95	22.67	40.95	62.97	21	25.29	27.85
Mt1	6	0.65	2.9357e-25	3.86162e-21	0.33	0.11	89.58	28.29	112.65	8.56	32.85	183.27	244.95	21.13	142.49	575.91	14.46	0.23	15.3	2.37	7.31	28.71	32.75	1.95	22.38	40.51
Phlda1	6	0.52	1.016e-24	1.33645e-20	0.46	0.25	167	20.29	218.25	42	101.06	141.93	271.61	15.3	305.56	200.85	34.28	5.05	38.14	13.54	22.21	38.37	45.73	1.73	46.22	28.48
Gm42418	7	1.37	4.285e-221	5.63649e-217	1	1	21453.3	25612	19823.7	24982.7	20956.5	17672.7	14024.3	85094.9	16564.7	35282.2	99.8	100	99.84	100	99.63	99.73	100	100	100	100
Ms4a4b	7	0.76	2.29243e-67	3.01546e-63	0.6	0.47	83.33	1573.91	76.88	1049.06	402.25	87.47	336.37	1175.89	6.51	69.26	21.96	97.59	19.19	84.35	57.13	26.53	41.14	59.52	2.62	14.56
AY036118	7	1.02	9.66542e-60	1.27139e-55	0.97	0.97	6262.83	3848.59	4984.61	3994.57	4503.24	5055.13	3687.35	13711.2	5035.06	6769.85	96.52	98.04	96.19	97.46	94.88	96.87	96.84	97.19	95.35	95.57
Itgb1	7	0.61	3.54461e-35	4.66258e-31	0.26	0.24	44.56	82.18	39.19	892.64	100.91	35.32	139	409.14	27.66	31.5	12.37	20.97	11.01	75.13	18.65	12.24	36.55	25.76	9.3	10.13
Trbv1	7	1.03	1.82752e-25	2.40392e-21	0.18	0.05	33.83	192.72	40.21	227.67	49.47	47.42	139.46	446.31	8.47	67.98	3.53	6.86	3.4	8.04	4.2	3.95	5.85	18.18	1.45	7.59
Trbv3	7	0.71	4.05844e-17	5.33847e-13	0.2	0.11	75	261.67	165.64	287.14	120.02	185.27	152.1	438.37	46.13	82.58	8.99	12.97	15.55	11.84	9.41	15.65	8.54	19.48	5.52	4.43
Trbv26	7	0.76	9.70894e-10	1.27711e-05	0.11	0.04	30.08	79.84	49.42	123.57	57.08	16.21	51.04	233.66	8.4	0	3.28	4.37	5.1	5.25	4.11	1.09	3.48	10.61	1.16	0
Smco4	8	1.58	6.85556e-205	9.0178e-201	0.82	0.32	153.52	21.11	250.14	144.87	111.53	122.42	89.27	75.51	1011.76	99.46	38.1	8.6	50.2	42.05	26.51	40.14	34.34	7.79	81.69	24.05
Lgmn	8	1.43	4.60533e-198	6.05784e-194	0.69	0.08	38.73	9.24	51.88	25.89	8.71	18.43	3.17	12.17	438.79	224.12	11.82	4.07	11.66	9.81	3.29	6.67	1.9	1.52	69.19	29.75
Klrg1	8	1.52	3.29784e-196	4.33798e-192	0.94	0.26	576.15	1.47	167.96	178.52	42.71	112.86	252.42	100.86	1355.77	110.23	65.72	0.3	22.67	17.85	5.94	19.59	33.54	6.49	93.9	16.46
Socs2	8	1.47	4.00889e-150	5.27329e-146	0.7	0.17	122.61	35.82	149.65	25.45	43.9	64.62	69.11	30.75	667.07	95.88	21.76	12.22	29.72	8.04	10.15	18.23	21.99	3.03	70.35	13.92
1700061F12Rik	8	1.18	8.24772e-135	1.0849e-130	0.52	0.04	96.45	0	4.06	0.22	2.16	0	1.58	0	301.92	12.02	17.29	0	0.89	0.08	0.55	0	0.47	0	52.03	1.9
Zeb2	8	1.22	1.1407e-132	1.50047e-128	0.62	0.09	76.66	1.78	131.06	3.31	10.15	29.3	19.77	1.05	386.61	112.74	15.15	0.23	25.43	1.1	2.29	8.44	8.86	0.22	62.21	18.99
Tiparp	8	1.34	1.54665e-126	2.03446e-122	0.65	0.19	115.75	16.6	242.18	24.41	58.4	88.33	40.02	17.99	610.49	135.75	24.49	6.33	40.16	8.97	15.27	25.58	18.2	1.95	65.41	24.68
Ctsh	8	1.06	2.46224e-126	3.23883e-122	0.51	0.05	47.3	0	5.82	3.8	3.63	9.95	15.22	1.41	241.38	213.52	13.56	0	1.7	1.27	0.73	3.27	5.38	0.43	50.87	27.22
4930503L19Rik	8	1.09	6.48237e-122	8.52691e-118	0.67	0.15	71.61	12.02	200.2	23.59	23.86	38.52	29.46	17.88	375.63	59.25	19.67	4.68	38.22	9.39	6.49	14.42	13.61	2.38	67.44	13.29
Cldnd1	8	1.05	5.0853e-119	6.6892e-115	0.92	0.46	623.75	31.17	531.32	152.26	230.22	392.68	56.84	86.62	1087.06	231.28	75.21	11.84	67.53	36.8	41.41	67.62	20.09	8.23	92.44	36.71
Ipmk	8	1.16	8.60725e-119	1.1322e-114	0.78	0.26	258.34	10.19	256.43	17.26	143.22	118.85	28.62	22.51	640	136.47	45.31	4	46.48	6.6	30.35	34.83	12.18	2.38	77.91	26.58
Calca	8	2.01	1.05946e-118	1.39362e-114	0.52	0.06	367.51	0	27.68	0	19.44	17.61	42.75	0	1360.24	70.4	20.07	0	2.83	0	2.1	4.08	5.22	0	51.74	5.06
Trav4-4-dv10	8	1.73	4.1668e-118	5.48101e-114	0.41	0.03	28.72	32.86	31	42	11.75	13.18	41.89	7.17	618.44	35.64	3.53	3.47	3.56	3.38	1.83	2.59	3.16	0.87	40.99	4.43
Npnt	8	1.1	9.59586e-118	1.26224e-113	0.51	0.05	94.29	0	10.12	1.23	0.35	3.31	1.71	0.79	273.39	22.48	19.72	0	2.59	0.51	0.09	1.36	0.79	0.22	50.58	3.8
Mtmr10	8	1.07	1.24885e-116	1.64273e-112	0.41	0.04	27.16	6.33	10.98	5.9	9.86	10.76	13.05	4.39	227.79	6.01	8.45	2.94	3.24	2.71	2.56	4.76	6.49	0.65	40.7	2.53
Pcyt1a	8	1.21	6.52256e-112	8.57978e-108	0.67	0.16	234.04	5.94	83.38	11	18.58	91.66	47.68	21	518.17	104.18	37.11	2.11	17.73	4.31	4.66	23.4	15.51	1.95	66.57	19.62
Hspa5	8	0.95	2.2431e-111	2.95058e-107	0.98	0.78	1674.88	188.97	1364.75	349.98	919.39	1337.49	694.29	256.68	2631.64	1328.31	96.17	51.06	93.04	66.75	85.47	94.97	83.07	19.48	97.97	72.15
Zfp36l1	8	1.01	1.57028e-109	2.06555e-105	0.98	0.84	3109.93	441.73	1939.06	968.2	1146.93	1098.25	810.68	565.8	4325.33	1248.59	96.57	72.93	92.39	85.28	84.55	89.39	82.28	37.23	97.97	66.46
Nckap5	8	0.9	2.59911e-101	3.41886e-97	0.43	0.04	26.75	0	40.94	0.24	0.81	12.63	7.76	0	180.42	47.97	8.3	0	10.12	0.17	0.27	5.31	3.01	0	43.02	8.23
Trav7-3	8	1.14	7.3078e-96	9.61268e-92	0.33	0.02	9.23	11.02	7.64	25.24	17	14.37	34.36	50.65	266.04	21.6	1.39	1.43	0.97	2.03	2.47	1.9	2.22	3.03	33.43	1.9
Il10	8	1.34	3.29274e-95	4.33126e-91	0.68	0.19	189.04	0	664.94	30.37	74.73	172.73	145.38	19.53	969.35	198.53	17.78	0	57.81	5.08	10.69	33.88	25	1.52	68.31	27.22
Nr3c1	8	0.84	6.73744e-94	8.86243e-90	0.93	0.59	847.36	84.1	768.95	117.86	443.54	416.26	202.22	87.33	1169.12	448.42	88.57	27.45	83.89	35.45	60.6	72.38	50.95	9.74	93.31	48.73
Tnfrsf9	8	0.96	1.23439e-92	1.62372e-88	0.97	0.59	2598.3	36.16	834.08	210.27	594.62	1839.14	1230.09	73.27	2960.92	975.05	94.88	9.95	71.01	29.19	56.76	94.01	83.39	6.49	97.38	58.23
Pxdc1	8	0.95	4.26517e-88	5.6104e-84	0.38	0.04	57.51	0	13.17	0.27	3.22	0	0	2.59	202.89	82	12.62	0	3.08	0.17	0.64	0	0	0.43	38.37	14.56
Nr4a1	8	1.14	7.67763e-87	1.00992e-82	0.86	0.46	1514.11	58.23	439.39	109.71	291.4	341.57	283.78	76.15	1868.02	568	87.88	12.97	54.49	15.74	42.41	60.95	42.56	4.76	85.47	48.73
Gm26669	8	0.93	2.85869e-86	3.76032e-82	0.89	0.62	1054.92	160.09	625.36	325.2	373.17	365.71	289.5	195.9	1445.73	442.91	84.65	44.27	70.69	60.32	57.22	66.94	56.33	15.15	89.24	47.47
Stx11	8	1.08	1.7565e-85	2.3105e-81	0.73	0.34	410.74	4.89	209.77	52.87	133.45	352.21	103.81	33.65	746.69	106.94	59.71	1.96	41.62	19.12	30.71	62.99	35.76	3.68	72.97	23.42
Id2	8	1.04	5.9051e-85	7.76757e-81	0.89	0.48	1046.86	21.32	707.47	112.25	197.46	795.85	571.72	72.24	1599.38	652.58	78.19	5.81	66.48	22.59	30.53	80.41	73.26	6.71	88.66	56.96
Cd44	8	0.88	3.51309e-83	4.62111e-79	0.82	0.4	393.56	35.1	365.49	111.71	110.47	173.43	110.76	85.29	637.3	247.96	63.59	12.29	59.19	34.94	26.23	46.94	34.49	8.44	81.98	37.34
Lmna	8	0.92	2.06756e-82	2.71966e-78	0.84	0.36	662.6	11.66	748	42.83	203.75	145.99	146.99	41.72	958.62	459.51	67.21	2.71	68.66	10.91	29.52	31.7	29.11	3.68	84.01	42.41
Tpbgl	8	0.88	8.71611e-82	1.14652e-77	0.41	0.05	69.49	1.25	19.11	2.38	6.57	9.63	0.66	6.39	193.18	11.62	16.64	0.6	5.1	1.02	0.91	3.27	0.32	0.43	40.7	3.8
Slco2b1	8	0.79	5.41431e-81	7.12198e-77	0.36	0.03	55.62	0	1.84	0	2.96	5.13	0.61	0	151.56	17.93	12.82	0	0.57	0	0.46	1.77	0.32	0	35.76	4.43
Dusp16	8	0.83	4.72239e-76	6.21183e-72	0.44	0.08	57.65	5.12	26.08	8.74	18.97	26.6	38.6	12.03	192.24	21.7	16.39	2.19	6.96	3.47	6.12	9.66	16.14	1.08	43.6	5.06
Nfkb1	8	0.81	1.82729e-75	2.40361e-71	0.89	0.64	1108.42	166.63	408.34	226.56	392.26	522.3	186.46	181.61	1219.55	404.61	90.16	49.7	62.67	54.31	62.8	75.78	52.06	16.23	88.95	55.06
Samsn1	8	0.7	1.72062e-71	2.2633e-67	0.94	0.62	899.93	50.72	667.8	163.9	496.73	520.9	439.68	137.87	1061.78	408.05	90.91	18.02	79.84	41.37	67.92	80.41	75.95	11.9	94.48	53.8
Gata3	8	0.83	1.74137e-70	2.2906e-66	0.84	0.43	915.03	62.37	139.27	227.93	154.36	159.52	155.03	91.93	863.17	248.13	84.75	21.49	24.13	46.95	29.8	39.05	40.35	8.66	84.01	30.38
Gzmb	8	1.98	3.96391e-70	5.21413e-66	0.55	0.2	315.97	3.37	1199.32	46.2	142.47	1017.84	1335.8	41.37	3918.16	530.06	17.09	0.38	39.27	4.74	11.61	46.39	54.11	3.46	54.94	18.99
Specc1	8	0.62	4.05607e-70	5.33536e-66	0.27	0.02	20.15	2.19	6.87	1.91	1.59	1.61	1.06	0	97.95	5.45	4.77	0.9	1.62	0.59	0.55	0.68	0.63	0	27.03	2.53
Dennd4a	8	0.68	4.19689e-70	5.52059e-66	0.95	0.61	1155.29	47.84	823.92	86.89	594.17	587.37	287.36	58.45	1191.26	591.7	92.95	16.44	85.43	26.99	71.57	84.49	59.65	5.41	94.77	63.92
Pdcd1	8	0.95	1.00574e-69	1.32295e-65	0.75	0.3	620.31	9.81	178.84	124.44	113.27	137.16	439.11	48.8	794.94	185.69	60.85	3.32	21.38	24.62	16.36	25.71	64.08	4.98	75	18.35
Hopx	8	1.02	2.85787e-69	3.75925e-65	0.94	0.71	2841.93	160.9	1281.34	266.05	869.08	3260.11	419.28	203.97	3874.66	1148.42	94.88	44.87	78.54	55.08	72.76	96.6	76.27	16.88	94.19	58.23
Ern1	8	0.87	1.04887e-68	1.37968e-64	0.71	0.28	340.78	1.96	242.41	6.81	105.67	211.35	21	5.85	492.56	128.34	56.53	0.9	43.16	2.62	22.67	52.11	8.23	0.43	70.64	25.95
Jak2	8	0.74	2.22661e-68	2.92888e-64	0.89	0.55	976.07	61.14	421.96	106.26	352.09	522.94	84.18	70.33	961.24	375.51	88.62	21.72	65.67	35.62	58.87	81.77	28.96	8.66	89.24	50
Nkg7	8	0.91	2.37883e-68	3.12912e-64	0.46	0.1	18.7	6.32	46.53	54.26	31.8	62.52	960.34	35.63	395.08	9.6	3.58	1.36	7.94	7.87	5.03	12.52	63.77	2.81	46.22	2.53
Rapgef2	8	0.7	1.5375e-66	2.02243e-62	0.38	0.06	57.93	5.23	11.06	7.54	9.16	10.26	10.45	6.72	140.64	19.26	15.45	2.41	3.56	3.72	3.2	4.49	4.91	0.87	38.37	5.7
Aldoa	8	0.64	4.45125e-64	5.85518e-60	0.96	0.75	722.79	307.45	544.53	495.92	464.79	920.92	2473.63	396.36	1412.49	503.18	82.12	70.06	74.66	80.88	64.35	88.44	96.99	28.57	96.51	60.13
Ndfip1	8	0.57	1.18079e-63	1.55321e-59	0.95	0.82	979.05	301.2	810.39	659.16	555.77	857.57	840.96	436.61	1316.47	536.98	92.15	71.04	86.48	86.46	76.87	92.93	94.46	31.82	95.35	63.29
Gm47599	8	0.6	5.82726e-63	7.66518e-59	0.23	0.01	14.24	0	6.59	0	0.83	4.16	4.1	0	90.94	4.48	4.12	0	1.7	0	0.18	1.09	1.11	0	22.97	1.27
Hpcal1	8	0.76	3.75998e-62	4.94588e-58	0.4	0.24	93.31	56.59	76.75	75.33	77.39	106.35	89.57	67.9	285.75	58.33	22.21	22.1	21.94	26.99	22.94	35.37	34.49	6.49	39.83	13.29
H2afz	8	0.9	4.81025e-62	6.32741e-58	0.97	0.85	4928.98	492.4	1242.6	1165.42	1555.26	1860.14	959.65	787.93	5080.02	1540.44	97.86	74.81	84.37	85.45	87.39	94.69	82.75	38.31	97.38	75.32
Dusp1	8	0.78	1.86656e-60	2.45528e-56	0.96	0.77	2232.55	328.43	2021.71	822.11	1254.19	1052.95	1053.39	273.79	2984	1444.29	94.88	51.06	90.12	70.47	82.18	88.84	81.96	19.26	96.51	67.72
Il13	8	0.76	6.07798e-60	7.99497e-56	0.17	0	5.93	0	0.37	0.11	0.14	0	4.1	0	117.29	0	1.19	0	0.16	0.08	0.09	0	0.79	0	16.57	0
Gm2a	8	0.73	4.37765e-59	5.75836e-55	0.76	0.42	226.81	93.86	192.17	153.84	86.79	220.52	278.22	149.04	471.69	244.78	49.18	32.73	41.94	43.15	24.59	56.6	64.24	12.99	76.16	41.14
Penk	8	1.73	1.97141e-58	2.59319e-54	0.37	0.07	316.59	1.75	27.9	105.35	31.53	182.3	90.22	100.74	1151.13	11.84	17.44	0.68	2.75	4.57	2.83	6.67	5.54	5.41	36.63	1.9
Fam46a	8	0.63	4.48806e-58	5.90359e-54	0.85	0.42	1200.52	26.11	419.14	48.3	285.4	855.34	172.98	31.29	969.65	453.15	81.82	7.84	44.37	14.38	37.39	72.79	36.87	2.6	84.88	39.24
Reps1	8	0.72	3.7727e-57	4.96261e-53	0.57	0.19	107.11	32.32	89.77	54.3	37.12	74.57	28.67	70.24	242.7	66.89	27.37	11.99	22.91	20.22	11.06	25.85	11.71	5.84	56.69	14.56
Nfkbiz	8	0.75	4.31721e-57	5.67886e-53	0.86	0.54	965.86	121.84	426.79	119.39	424.46	324.88	249.42	108.9	1008.58	483.74	86.79	32.65	57.17	30.96	58.41	59.46	45.25	7.36	86.34	50
Asb2	8	0.76	4.63423e-57	6.09587e-53	0.58	0.19	110.59	4.5	132.59	31.22	25.74	135.74	146.83	18.19	277.41	131.41	28.56	0.6	30.77	7.78	7.13	38.1	38.61	1.73	58.14	23.42
Junb	8	0.61	1.73436e-56	2.28138e-52	1	0.94	7953.06	1451.95	7269.99	2058.34	6365.44	6064.43	2405.31	1244.82	9155.5	5366.32	99.8	88.01	99.84	93.23	99.54	99.59	93.35	55.41	99.71	81.01
Hacd3	8	0.71	2.73749e-56	3.6009e-52	0.74	0.35	325.89	27.56	135.04	91.55	110.23	177.92	89.58	33.22	403.75	117.46	61.95	10.78	34.25	30.2	27.7	48.84	32.59	4.33	73.55	26.58
Manf	8	0.72	4.7344e-56	6.22762e-52	0.66	0.4	208.17	89.76	191.09	99.23	125.74	243.62	140.13	103.64	422.19	175.91	48.44	32.13	43.81	35.19	32.72	57.28	46.84	10.82	65.7	34.81
Ccr8	8	0.93	9.74553e-56	1.28193e-51	0.67	0.28	392.69	3.34	143.67	69.01	77.77	337.07	372.91	10.69	623.72	90.24	52.51	1.51	21.38	14.89	15.27	54.56	53.01	1.73	67.15	18.35
Tigit	8	0.62	1.17796e-55	1.54949e-51	0.95	0.64	1221.72	5.91	1073.03	343.18	607.98	1193.97	1177.75	145.81	1487.59	746.62	92.55	1.13	87.45	48.22	62.16	94.29	92.72	12.55	95.35	56.96
Camk2n1	8	0.66	3.82294e-55	5.02869e-51	0.66	0.25	174.8	15.46	226	24.21	57.76	159.59	58.95	23.21	297.34	121.7	41.98	5.96	46.8	8.29	13.25	44.22	20.09	2.38	65.7	24.68
Sh3bp4	8	0.63	5.97986e-55	7.86591e-51	0.29	0.04	43.24	0.89	7.69	5.58	3.35	6.59	1.6	0.31	111.58	6.18	12.27	0.38	2.11	2.2	0.91	2.86	0.95	0.22	29.36	1.9
Palld	8	1	1.72459e-54	2.26852e-50	0.24	0.02	53.2	0	6.91	1.47	1.91	4.89	0.88	0.49	210.79	0	7.6	0	1.21	0.68	0.55	0.41	0.47	0.43	23.55	0
Pqlc1	8	0.72	2.84585e-54	3.74343e-50	0.56	0.18	118.51	6.64	135.31	5.91	42.63	260.85	14.36	4.71	263.64	92.44	28.66	2.56	26.88	2.45	11.97	58.23	6.65	0.65	56.4	21.52
Hsp90b1	8	0.71	1.49191e-53	1.96246e-49	0.86	0.64	491.71	174.7	477.17	267.64	367.07	530.27	366.51	202.22	869.53	647.53	71.54	51.21	68.83	61.84	61.7	79.59	75.32	17.75	85.47	60.13
Arl5a	8	0.76	1.79124e-53	2.35619e-49	0.67	0.32	131.76	43.82	199.5	103.91	77.5	171.3	236.71	85.37	382.1	156.36	33.78	17.72	41.05	29.95	19.74	46.94	57.75	7.36	66.86	32.28
Adam8	8	0.67	3.91019e-53	5.14346e-49	0.5	0.14	90.98	1.04	121.97	21.17	16.7	39.52	95.54	4.91	201.96	40.93	24.04	0.15	28.02	6.68	4.02	13.47	33.07	1.08	50.29	10.13
Rora	8	0.61	4.24911e-53	5.58929e-49	0.93	0.61	1930.93	20.12	770.15	166.21	616.04	1079.81	299.67	78.89	1515.63	570.04	97.86	6.56	76.92	39.68	63.44	92.11	61.71	8.44	93.31	54.43
Nrip1	8	0.66	7.05483e-53	9.27992e-49	0.9	0.6	868.45	145.82	707.13	167.85	440.21	433.94	190.15	127.65	980.46	449.88	82.61	41.78	75.47	41.62	58.87	73.61	49.53	12.34	89.83	49.37
Gadd45b	8	0.81	8.99011e-53	1.18256e-48	0.88	0.57	2000.75	23.11	1124.73	88.3	768.72	1240.54	651.55	32.72	2144.93	1191.23	91.31	7.84	75.38	20.47	67.55	89.39	67.72	3.68	87.79	65.82
Trbv16	8	0.51	6.96983e-52	9.16811e-48	0.31	0.06	35.65	143.79	87.5	190.23	72.72	43.96	76.85	112.76	221.19	99.09	4.42	7.16	8.66	7.78	5.58	3.95	3.48	6.06	30.81	9.49
Il4	8	0.67	9.23322e-52	1.21454e-47	0.2	0.01	18.63	0.83	0.8	4.62	0.45	8.45	6.36	0	107.46	0	4.42	0.08	0.32	1.52	0.18	0.27	0.63	0	20.35	0
Tox2	8	0.71	1.00279e-51	1.31908e-47	0.55	0.19	120.53	2.16	98.55	49.94	56.55	107.76	19.87	38.13	242.52	52.04	31.54	0.68	25.51	16.16	15.27	32.11	7.12	3.68	54.65	16.46
Ahr	8	0.79	2.53001e-51	3.32798e-47	0.51	0.17	96.96	11.71	116.42	37.09	92.61	65.41	25.74	19.35	266.64	69.64	23.6	3.85	27.94	14.13	20.57	20.82	11.23	2.16	50.87	13.92
Dennd5a	8	0.73	2.58926e-51	3.40591e-47	0.59	0.24	234.18	21.88	93.52	30.11	61.41	122.38	21.19	15.56	305.18	105.48	49.38	9.13	23.72	11.08	18.19	35.51	9.34	3.03	59.01	24.05
Gas2l3	8	0.71	8.75667e-50	1.15185e-45	0.33	0.07	76.92	0.4	18.03	0.14	9.5	26.56	5	0.29	152.34	18.77	19.47	0.15	5.91	0.08	3.38	9.8	2.85	0.22	33.14	6.33
Areg	8	0.98	6.5296e-49	8.58904e-45	0.77	0.38	2377.31	2.72	468.06	62.41	379.3	1342.78	235.28	19.83	2314.29	801.9	86.49	1.13	37.73	11.84	32.18	64.22	21.84	1.95	76.74	41.14
Ikzf3	8	0.66	2.01852e-48	2.65516e-44	0.8	0.52	327.07	172.23	536.99	213.99	249.98	334.1	207.62	176.07	654.9	286.99	55.74	47.51	71.82	47.38	44.7	65.85	52.22	14.07	79.65	41.77
Zfp36	8	0.79	4.04091e-47	5.31542e-43	0.89	0.67	1025.68	488.35	1008.16	862.81	1194.21	328.57	998.35	543.59	2024	1260.93	70.14	68.1	68.34	72.67	74.04	52.93	73.58	33.77	88.95	61.39
Ky	8	0.68	5.47574e-47	7.20278e-43	0.49	0.15	177.62	0	86.46	2.25	12.17	109.21	4.01	0.79	224.5	74.36	38.1	0	18.95	0.76	3.38	28.71	1.9	0.22	48.84	16.46
Myadm	8	0.77	1.19137e-46	1.56713e-42	0.44	0.13	114.67	2.74	88.23	21.08	21.75	43.72	11.9	11.27	225.29	92.2	27.47	0.38	20.57	7.11	6.67	15.51	4.91	1.08	43.6	16.46
Rab11a	8	0.65	2.13179e-46	2.80415e-42	0.66	0.37	157.56	71.48	207.5	120.85	126.6	178.82	164.38	72.94	362.92	158.66	40.19	25.34	44.94	38.07	31.08	52.65	51.27	6.93	65.99	31.65
Cep85l	8	0.73	2.96957e-46	3.90617e-42	0.48	0.17	121.95	15.14	66.2	25.45	41.11	77.59	38.16	19.02	229.6	46.11	29.96	6.11	17.73	10.58	12.16	25.71	16.14	1.3	47.67	12.66
Ptpn13	8	0.65	8.97312e-46	1.18032e-41	0.58	0.22	282.97	14.52	93.89	60.58	86.49	53.13	18.82	45.01	298.64	51.81	50.22	5.96	19.6	20.56	17.37	15.51	6.8	4.33	58.43	13.29
Tmtc2	8	0.55	4.20849e-45	5.53584e-41	0.27	0.04	44.35	2.35	1.56	2.31	4.21	14.96	3.2	0	95.89	3.1	12.47	0.9	0.73	0.76	1.37	6.39	1.11	0	26.74	1.27
Egln3	8	0.68	1.59245e-44	2.09471e-40	0.38	0.1	90.47	2.32	22.54	15.27	18.46	26.02	46.07	0.31	166.07	18.91	23.1	1.13	6.8	4.82	4.94	10.61	17.72	0.22	37.79	6.33
Elf1	8	0.59	3.03999e-44	3.99881e-40	0.88	0.69	662.29	228.4	458.99	313.63	520.41	429.65	272.91	203.95	851.88	339.84	82.86	57.99	69.96	67.68	71.76	78.1	68.99	17.32	88.37	51.9
Lyn	8	0.69	1.49626e-41	1.96818e-37	0.49	0.18	172.67	1.69	102.29	16.98	31.01	77.72	49.84	5.03	249.43	240.27	38.05	0.23	23.08	6.26	8.41	21.5	18.2	0.87	48.84	31.01
Skil	8	0.65	1.67109e-41	2.19815e-37	0.69	0.4	334.48	49.36	267.2	42.35	191.58	259.81	142.5	60.13	455.54	273.03	62.39	18.93	49.64	15.48	40.04	61.22	40.35	4.98	68.9	43.67
Ywhaz	8	0.51	5.81891e-41	7.6542e-37	0.97	0.85	777.54	643.39	738.78	778.94	648.65	642.48	789.18	635.27	1253.52	606.35	88.43	89.74	85.43	90.44	82.08	86.67	94.3	40.69	97.38	70.25
Anxa11	8	0.6	1.51464e-40	1.99236e-36	0.64	0.36	165.91	78.42	123.08	129.6	78.48	154.15	141.48	86.9	307.67	94.53	42.62	29.26	31.5	43.15	23.03	46.67	49.21	9.52	63.66	24.68
Ahnak	8	0.59	1.95594e-40	2.57284e-36	0.9	0.64	839.45	132.92	1211.22	511.37	388.56	435.54	468.1	295.09	1141.71	473.22	81.77	26.85	87.94	68.7	52.74	67.76	74.84	22.08	90.41	50.63
Pdia6	8	0.59	2.34879e-40	3.0896e-36	0.64	0.33	177.23	62.18	142.26	84.06	111.48	160.48	83.23	41.62	295.43	126.01	43.57	24.89	35.79	29.44	29.25	49.66	31.65	5.19	63.66	29.75
Ier5	8	0.59	2.19903e-39	2.8926e-35	0.83	0.61	868.82	161.74	419.3	277.81	402.69	337.17	335.18	190.65	873.7	494.99	86.04	43.74	61.78	57.61	58.14	62.59	62.66	16.67	82.85	56.33
Nfkbia	8	0.69	4.74006e-39	6.23507e-35	0.96	0.82	5038.65	381.79	2530.35	770.22	2321.57	2141.68	2977.91	369.3	4898.2	2344.51	99.5	60.94	89.55	70.98	89.4	94.29	90.98	22.94	96.51	80.38
Sytl3	8	0.75	9.19254e-39	1.20919e-34	0.53	0.22	282.84	1.18	130.73	5.83	27.83	225.47	105.18	6.89	362.56	211.46	44.66	0.45	25.59	2.2	7.5	45.99	32.44	1.08	52.91	20.25
Gpx4	8	0.55	1.52565e-38	2.00684e-34	0.93	0.76	1300.41	334.8	473.52	463.89	529.75	773.89	556.55	386.48	1237.46	586.48	90.86	73.08	68.99	76.65	67.82	86.94	85.28	30.09	92.73	63.92
Nav2	8	0.65	1.1314e-37	1.48825e-33	0.48	0.17	193.32	4.39	70.49	76.26	26.96	73.48	9.9	36.38	243.23	93.43	39	1.43	17.49	17.17	7.13	17.82	3.96	3.25	47.97	13.29
Cmtm7	8	0.64	1.24641e-37	1.63952e-33	0.66	0.41	168.2	80.85	234.16	146.83	100.3	230.23	310.63	123.53	403.01	171.01	40.83	29.49	47.69	44.08	26.87	55.78	71.99	12.34	65.7	32.28
Fosl2	8	0.57	1.29887e-36	1.70853e-32	0.81	0.5	793.47	6.36	782.08	10.76	593.77	568.18	126.64	23.14	837.91	483.17	83.85	1.06	80.65	3.64	69.38	82.31	33.86	1.95	81.1	56.33
Calr	8	0.59	1.98108e-36	2.60591e-32	0.73	0.49	320	108.06	260.51	150.58	215.78	305.07	185.88	110.19	478.76	300.03	61.1	35.14	52.23	42.72	46.07	65.58	52.37	11.9	72.97	49.37
Neb	8	0.65	2.51086e-35	3.30278e-31	0.5	0.2	105.84	15.31	135.92	52.98	24.33	179.96	100.5	30.13	248.31	113.8	25.73	5.58	28.18	13.54	7.04	44.35	31.17	3.46	50	19.62
Il10ra	8	0.67	4.83723e-35	6.36289e-31	0.49	0.2	169.05	22.25	34.74	104.4	32.45	19.73	170.42	64.98	258.91	94.2	32.84	8.52	9.96	31.47	8.23	8.03	48.58	6.28	48.84	17.09
Lag3	8	0.64	1.10873e-34	1.45843e-30	0.44	0.16	39.04	8.51	126.87	64.08	27.03	289.31	305.08	21.79	255.96	93.96	9.99	2.41	21.78	14.97	5.94	49.93	46.04	1.95	44.19	17.72
Cd164	8	0.55	2.16401e-34	2.84653e-30	0.68	0.43	172.3	103.32	306.03	142.33	177.75	149.47	159.69	136.92	371.54	152.47	42.77	35.9	55.87	45.52	42.41	44.49	52.06	12.12	68.02	36.71
Ctgf	8	0.94	2.65606e-34	3.49378e-30	0.12	0.01	28.81	0	6.6	0	0.58	0	0	0	175.78	29.58	1.94	0	0.89	0	0.18	0	0	0	12.21	0.63
Il1rl1	8	0.77	5.70871e-34	7.50924e-30	0.51	0.22	629.17	2.83	32.12	40.2	41.13	91.94	23.42	34.66	489.99	176.9	70.39	0.75	5.91	11.51	8.78	17.69	4.91	2.6	50.87	22.15
Vgll4	8	0.54	4.98617e-33	6.55881e-29	0.74	0.46	387.59	57.51	316.02	76.98	233.33	441.66	207.85	71.96	482.4	234.57	63.54	21.12	55.38	26.4	43.88	75.51	54.59	7.14	74.42	39.24
Spcs3	8	0.57	8.34397e-33	1.09757e-28	0.46	0.19	118.23	44.05	29.94	54.39	40.65	41.42	47.2	53.71	184.43	77.53	30.9	18.4	10.2	20.81	12.25	17.41	19.94	5.84	46.22	15.82
Tnfrsf4	8	0.7	1.09455e-32	1.43977e-28	0.9	0.76	3258.56	129.32	1339.08	656.82	1249.44	2757.68	1378.85	253.56	3236.8	1209.48	98.31	32.28	88.1	66.07	84.37	97.28	91.77	18.61	89.53	60.13
Dusp10	8	0.53	1.48258e-32	1.95018e-28	0.7	0.39	584.25	101.33	144.89	50.06	426.12	149.13	56.17	53.8	492.51	102.68	72.93	32.65	25.59	17.68	52.1	33.06	19.94	5.63	70.35	20.25
Cd28	8	0.58	4e-32	5.26161e-28	0.81	0.61	619.62	205.51	617.78	288.14	345.81	249.11	343.6	317.48	801.41	285.33	74.17	51.81	72.87	62.18	53.93	53.74	69.46	21.86	80.81	35.44
Tnfrsf18	8	0.53	1.3531e-31	1.77987e-27	0.92	0.76	1615.33	189.93	695.99	451.7	782	1233.45	1092.49	232.33	1516.97	589.73	95.38	50.38	78.54	71.74	78.98	95.37	93.83	19.48	91.57	55.06
Il7r	8	0.59	2.01322e-31	2.64819e-27	0.79	0.55	452.19	268.61	397.2	586.48	352.74	232.36	271.13	258.32	759.11	246.31	68.31	47.13	58.3	66.33	51.65	49.25	43.04	18.18	78.78	39.87
Mdh1	8	0.52	5.3864e-31	7.08527e-27	0.76	0.55	326.33	167.93	268.24	231.35	280.6	424.54	227.9	190.48	522.7	303.79	59.22	52.26	49.39	62.52	51.74	71.43	60.92	16.23	75.87	46.2
Tex30	8	0.59	9.609e-31	1.26397e-26	0.36	0.13	87.13	25.57	36.86	21.6	41.28	50.12	35.82	16.84	162.28	28.5	20.07	9.5	11.5	9.14	12.52	18.23	16.3	2.16	35.47	8.23
Src	8	0.51	1.29598e-30	1.70473e-26	0.36	0.11	83.32	3.24	52.77	10.9	24.89	43.4	14.03	7.71	127.94	27.57	24.34	1.43	14.98	4.57	7.22	16.6	6.8	1.08	35.47	8.86
Rgs1	8	0.54	1.44531e-30	1.90116e-26	0.92	0.7	1462.78	274.01	2152.48	427.64	1040.22	1475.61	1080.38	351.68	1971.86	1858.28	85	43.21	88.58	52.12	76.05	89.12	77.85	23.59	91.57	74.05
Hspb1	8	0.56	1.6659e-30	2.19133e-26	0.17	0.02	27.88	1.33	50.15	4.14	11.35	7.25	7.66	0.6	105.42	60.7	3.68	0.15	4.86	1.18	1.28	1.5	2.06	0.22	17.15	3.8
Ttc39c	8	0.57	1.9815e-30	2.60646e-26	0.54	0.25	164.77	1.39	111.64	47.73	64.8	263.67	98.14	58.58	258.6	128.47	39	0.53	26.15	18.02	17.55	60.95	32.59	5.19	53.78	27.85
Trav9-1	8	0.61	3.33963e-30	4.39295e-26	0.19	0.03	11.25	20.01	14.19	25.65	11.56	14.16	24.07	36.88	115.65	23.62	2.29	3.09	2.51	3.3	2.56	2.45	2.69	3.25	18.6	3.16
Hilpda	8	0.7	6.15846e-30	8.10083e-26	0.52	0.26	197.77	19.83	272.18	23.92	73.7	152.06	223.67	15.71	363.75	150.58	35.67	8.07	43.72	9.39	17.28	37.82	43.51	1.52	52.33	27.22
Myo1e	8	0.52	7.75306e-30	1.01984e-25	0.57	0.28	284.9	11.83	121.42	71.69	80.58	112.34	69.2	44.86	274.11	139.66	53.1	3.92	27.45	24.03	21.3	34.01	26.74	4.11	57.27	27.85
Elmo1	8	0.5	9.05837e-30	1.19154e-25	0.6	0.35	153.88	125.31	123.21	134.07	119.56	120.32	89.36	142.84	279.5	85.52	38.05	40.8	31.5	42.64	30.16	39.32	33.23	14.29	59.88	20.25
Akap12	8	0.63	3.5188e-29	4.62862e-25	0.2	0.04	39.7	7.74	9.13	10.13	8.05	6.79	6.29	0.88	115.52	10.66	8	3.39	3.24	4.23	2.1	2.99	2.69	0.65	20.06	3.16
Tagln2	8	0.51	3.94833e-29	5.19364e-25	0.88	0.66	641.8	248.08	741.57	485.29	374.38	490.15	510.61	407.13	913.78	503.68	76.01	52.19	78.22	67.51	52.93	74.97	81.49	27.49	87.5	60.13
Tank	8	0.52	7.69363e-29	1.01202e-24	0.71	0.47	396.86	88.75	212.28	133.79	216.49	253.98	150.22	123.06	440.64	263.17	69.4	29.79	43.64	38.24	43.88	61.9	47.47	10.17	70.64	41.77
Rbfa	8	0.6	1.09824e-28	1.44463e-24	0.46	0.22	134.16	57.96	65.1	42.97	43.07	179.72	58.29	33.81	231.72	69.03	26.58	22.25	18.46	16.84	13.44	47.48	24.53	3.68	46.51	19.62
Raph1	8	0.52	1.45181e-28	1.90972e-24	0.33	0.1	110.74	4.43	33.29	19.39	11.24	15.09	33.84	10.18	133.05	14.39	24.54	1.13	9.39	7.87	3.56	6.26	14.87	1.52	33.14	5.7
Kdm6b	8	0.54	1.48287e-28	1.95057e-24	0.7	0.44	769.01	48.12	293.45	58.6	256.5	285.54	71.64	38.02	588.4	387.5	83.56	17.27	50.04	17.01	44.52	62.31	25	3.25	69.48	50.63
Ivns1abp	8	0.58	2.96533e-28	3.90059e-24	0.51	0.29	192.29	49.02	121.14	71.34	99.89	116.62	50.47	45.36	271.88	109.4	44.31	19.23	31.66	24.62	26.14	37.28	18.35	6.06	51.16	27.22
Spry1	8	0.6	7.63585e-28	1.00442e-23	0.33	0.11	72.75	21.83	95.39	34.49	40.9	7.31	18.54	13.6	165.33	27.83	15.1	7.62	19.19	10.49	7.95	2.45	7.12	1.52	32.56	6.96
Gpr15	8	0.52	1.31909e-27	1.73513e-23	0.35	0.11	72.4	2.81	85.1	25.17	50.91	47.88	6.02	7.58	141.64	29.19	19.42	0.83	19.84	6.01	12.8	16.19	1.27	0.87	34.59	6.33
Stat3	8	0.51	4.44705e-27	5.84965e-23	0.85	0.65	881.79	191.35	555.78	179.64	508.71	1014.24	374.97	135.12	936.12	467.72	79.43	52.87	69.07	50.42	69.1	91.29	71.04	11.04	84.88	56.33
Dusp4	8	0.5	1.92257e-26	2.52895e-22	0.71	0.42	423.61	15.23	630.02	19.95	305.22	536.3	112.74	15.37	536.41	275.45	60.06	4.98	73.36	8.21	46.98	78.78	35.44	1.95	70.64	38.61
Tnfsf8	8	0.63	3.76095e-25	4.94716e-21	0.54	0.28	511.48	72.31	330.72	71.75	286.2	156.7	17.06	23.91	531.19	146.36	45.11	21.87	34.49	16.5	36.75	21.63	2.53	1.95	53.49	13.92
Rel	8	0.53	3.12643e-24	4.1125e-20	0.73	0.5	1203.11	64	327.03	95.36	326.76	626.88	129.86	66.48	843.22	525.27	86.64	21.72	47.85	26.31	50.55	74.01	36.23	6.93	72.97	56.33
N4bp1	8	0.51	4.79513e-24	6.30752e-20	0.55	0.29	212.28	30.64	138.63	44.35	74.23	173.54	101.42	13.23	251.86	121.26	46.75	12.22	34.01	16.84	19.47	44.9	35.92	2.6	55.23	27.22
Dapp1	8	0.52	5.95317e-23	7.8308e-19	0.47	0.25	144.49	35.67	68.06	93.45	102.27	103.31	38.46	58.29	217.26	85.93	36.71	14.25	18.79	31.05	26.6	34.29	16.46	5.19	47.38	18.99
Kit	8	0.62	6.1422e-22	8.07945e-18	0.16	0.04	70.92	0.23	8.57	1.14	2.61	5.72	1.62	0	119.87	7.94	12.72	0.15	1.78	0.25	1.1	2.31	0.63	0	16.28	2.53
Serpinb6b	8	0.6	9.08273e-22	1.19474e-17	0.35	0.17	178.31	15.55	53.76	25.24	64.23	94.94	59.12	22.92	219.17	47.16	32.14	6.33	12.23	9.39	14.9	25.44	21.04	2.38	35.17	9.49
Siah2	8	0.59	2.44149e-21	3.21153e-17	0.37	0.19	112.29	19.89	83.08	22.31	78.32	85.75	77.96	31.09	202.03	59.83	26.38	8.14	21.46	9.39	21.48	28.16	30.06	2.16	36.63	14.56
Lmo4	8	0.64	4.15635e-20	5.46727e-16	0.18	0.09	80.58	24.76	35.63	11.41	34.97	27.07	4.13	8.42	158.78	17.8	16.15	9.43	8.18	3.89	8.32	7.07	1.58	0.65	17.73	5.06
Phlda1	8	0.59	4.30643e-20	5.66468e-16	0.46	0.26	167	20.29	218.25	42	101.06	141.93	271.61	15.3	305.56	200.85	34.28	5.05	38.14	13.54	22.21	38.37	45.73	1.73	46.22	28.48
Serp1	8	0.51	1.60978e-18	2.11751e-14	0.67	0.48	397.78	102.48	188.82	108.97	259.9	368.79	132.04	120.4	452.4	273.71	65.82	35.22	40.73	36.21	51.92	72.11	46.36	11.26	66.86	45.57
Cd74	9	3.51	0	0	0.99	0.32	391.32	29.13	117.84	153.87	127.71	356.26	442.81	177.96	200.04	10616.3	51.47	5.35	19.84	31.64	21.66	57.69	56.65	10.17	32.85	99.37
H2-Aa	9	3.44	5.31414e-235	6.99022e-231	0.92	0.04	35.34	2.65	19.76	1.32	14.25	28.12	18.16	25.05	28.72	3590.33	8.4	0.15	4.45	0.59	3.93	8.44	1.58	1.73	5.81	91.77
H2-Eb1	9	3.26	1.52601e-214	2.00731e-210	0.9	0.05	37.69	1.64	16.66	2.1	14.65	24.33	27.64	23.51	33.86	3021.29	9.24	0.3	4.21	0.59	3.93	7.62	5.38	2.16	9.3	90.51
H2-Ab1	9	2.79	6.03258e-195	7.93525e-191	0.85	0.04	21.34	0.19	10.97	3.68	9.82	13.3	49.44	13.53	13.43	1757.04	5.96	0.08	2.83	1.18	2.56	4.76	15.03	1.08	2.91	85.44
Apoe	9	3.19	1.45372e-162	1.91223e-158	0.75	0.05	49.76	2.64	22.2	4.1	23.47	25.14	0	109.31	40.82	2974.5	9.84	0.68	5.43	0.93	5.39	6.94	0	4.55	7.27	74.68
Lyz2	9	2.6	3.7405e-113	4.92025e-109	0.58	0.03	28.16	0.3	12.53	2.94	11.38	14.43	1.37	25.75	27.78	1424.34	6.66	0.15	3.16	0.42	2.56	4.76	0.63	1.3	6.1	57.59
Cst3	9	2	4.32824e-102	5.69336e-98	0.7	0.36	132.98	90.11	134.21	134.33	78.98	146.22	211.52	108.51	163.87	1578.26	35.82	30.24	33.6	42.98	21.85	45.99	59.18	11.69	43.9	69.62
Il1b	9	2.42	9.90313e-101	1.30266e-96	0.5	0.02	18.24	0.27	10.2	0	5.52	8.24	0.58	1.79	12	1112.28	4.07	0.08	2.43	0	1.83	2.31	0.16	0.22	2.62	50
C1qb	9	2.3	1.30615e-99	1.71811e-95	0.51	0.02	13.25	1.36	10.11	1.87	6.87	9.45	1.68	29.83	15.75	985.03	3.87	0.15	2.83	0.17	2.01	3.27	0.63	0.87	4.07	50.63
C1qa	9	2.2	5.81837e-96	7.65348e-92	0.48	0.02	11.8	0.49	5.59	0.51	2.57	8.03	0.38	43.61	12.4	867.03	3.23	0.15	1.62	0.17	0.91	2.72	0.32	0.65	3.2	48.1
C1qc	9	2.07	9.48887e-83	1.24817e-78	0.42	0.02	11.28	0.24	4.98	1.17	3.44	5.61	0.34	27.55	6.88	740.26	3.13	0.08	1.54	0.17	1.46	2.18	0.16	1.3	2.33	42.41
Fcer1g	9	1.95	3.41502e-80	4.49211e-76	0.44	0.01	6.64	2.34	7.21	1.45	4.91	7.39	0.64	46.81	7.21	651.49	2.24	0.3	1.62	0.42	1.01	2.72	0.16	1.95	2.03	43.67
Tyrobp	9	1.95	1.72249e-79	2.26577e-75	0.42	0.01	4.96	0.59	5.94	0.73	6.56	2.75	1.38	33.71	4.18	641.47	1.49	0.3	1.13	0.34	1.19	1.22	0.32	1.3	1.16	41.77
Psap	9	1.42	4.22869e-75	5.56242e-71	0.61	0.49	149.66	230.84	200.97	230.2	159.5	158.61	159.55	224.3	192.73	1087.56	40.14	63.65	48.02	62.35	39.58	49.39	53.48	21	52.03	61.39
Plbd1	9	1.08	5.24338e-56	6.89714e-52	0.25	0	0.87	0.12	0.8	0.18	0.69	0.57	1.61	5.98	1.72	197.67	0.2	0.08	0.24	0.08	0.27	0.27	0.32	0.43	0.58	25.32
Mafb	9	1.61	5.43591e-54	7.1504e-50	0.3	0.01	10.53	1.03	6.89	0.49	3.66	3.27	2.03	0	8.93	422.55	2.38	0.08	1.62	0.08	1.1	1.36	0.63	0	2.62	29.75
Pf4	9	1.13	3.68547e-53	4.84787e-49	0.29	0.01	5.51	0.32	6.78	0.17	3.29	1.99	0.18	0	6.65	218.89	1.74	0.15	1.86	0.08	0.91	0.82	0.16	0	1.74	29.11
Cxcl16	9	1.24	2.07945e-48	2.73531e-44	0.3	0.02	12.3	0.35	4.98	0.11	4.64	9.68	2.03	0	7.27	262.58	3.83	0.15	1.54	0.08	1.37	3.67	1.11	0	2.62	30.38
Ftl1	9	1.08	6.28718e-47	8.27016e-43	0.94	0.89	1050	806.6	1100.99	877.33	1349.18	1253.95	1068.67	880.51	1093.55	3289	90.11	92.84	88.1	91.88	92.23	95.24	92.88	48.92	93.02	93.67
H2-DMa	9	1.02	4.83313e-45	6.3575e-41	0.32	0.09	8.37	30.66	15.32	38.61	19.28	24.48	37.5	14.47	13.97	238.19	3.28	12.52	4.86	15.91	6.22	11.29	18.04	2.38	5.23	31.65
Basp1	9	1.45	4.52704e-44	5.95487e-40	0.23	0.01	4.75	2.59	2.6	0.79	3.56	3.49	2.45	1.4	3.73	337.93	1.49	0.83	0.57	0.17	1.1	1.36	0.95	0.22	1.16	23.42
Aif1	9	0.95	6.22489e-44	8.18822e-40	0.24	0.01	3.44	0.27	2	0.61	1.17	4.06	0	18.32	1.72	166.57	1.19	0.08	0.57	0.25	0.37	1.22	0	0.43	0.58	24.05
H2-DMb1	9	0.98	8.94378e-44	1.17646e-39	0.22	0.01	3.86	1.41	1.09	0.55	0.65	1.77	2.18	0.67	0.92	170.7	1.24	0.15	0.4	0.42	0.46	0.54	0.95	0.43	0.29	22.15
Ctsz	9	1.07	1.97496e-43	2.59786e-39	0.35	0.19	52.31	35.75	45.64	64.09	34.85	59.24	118.7	41.53	103.5	349.67	16.79	15.31	13.77	24.28	11.06	23.81	45.25	5.41	30.81	34.81
Ly86	9	1.06	2.34376e-43	3.08299e-39	0.22	0	1.04	0.38	0.66	0	0.75	1.9	0.58	5.85	0.86	191.96	0.3	0.08	0.24	0	0.27	0.68	0.16	0.43	0.29	21.52
Cd68	9	1.07	1.11684e-42	1.4691e-38	0.24	0.01	2.88	1.53	3.92	2.6	2.44	5.3	3.28	14.83	5.68	201.28	1.04	0.23	1.3	0.59	0.55	2.31	1.74	1.08	2.33	24.05
Fth1	9	0.97	2.20571e-42	2.90139e-38	0.99	0.96	3983.07	1186.99	5500.88	1359.07	3624.64	5988.96	2849.77	1144.02	3733.08	8914.74	99.25	97.66	99.03	97.46	98.35	99.18	99.37	55.19	99.71	99.37
Ftl1-ps1	9	1.08	4.05775e-40	5.33756e-36	0.37	0.24	72.49	59.67	77.94	71.91	109.39	91.17	46.68	66.63	68.16	414.3	22.7	23.45	21.62	26.48	29.25	31.97	21.04	6.93	25.29	37.34
Unc93b1	9	1.04	1.09386e-37	1.43887e-33	0.28	0.06	14.6	8.23	15.93	32.09	15.96	21.46	16.71	9.52	17.6	231.45	5.51	3.92	5.02	12.77	5.39	8.98	6.96	1.73	5.81	28.48
Ifitm3	9	1.29	2.49156e-36	3.2774e-32	0.25	0.02	3.36	6.12	14.59	1.14	1.56	3.13	29.17	6.18	1	285.58	1.14	1.66	1.7	0.51	0.82	1.09	8.7	0.65	0.58	24.68
Csf1r	9	1.25	2.86553e-36	3.76931e-32	0.2	0	1.98	3.2	2.79	0.62	0	1.75	0.27	4.15	1.37	256.38	0.7	0.53	0.65	0.25	0	0.82	0.16	0.22	0.58	19.62
Ctsb	9	1.17	3.64272e-36	4.79164e-32	0.6	0.48	173.48	112.59	262.51	272.17	130.82	297.67	432.03	235.83	285.69	929.33	42.57	38.76	51.26	59.73	33.36	65.44	79.27	16.88	63.08	59.49
Ctsc	9	1.05	4.05138e-36	5.32918e-32	0.36	0.13	20.84	38.97	45.81	52.8	35.95	34.72	47.48	35.03	31.21	291.85	6.81	15.91	11.9	20.39	11.15	13.61	18.67	5.19	11.05	36.08
Fcgr3	9	0.84	4.43315e-35	5.83136e-31	0.18	0	1.47	0	0.66	0.72	1.27	2.52	1.46	0	3.41	133.47	0.55	0	0.24	0.17	0.37	1.09	0.63	0	0.87	18.35
Cd300c2	9	0.73	1.29835e-34	1.70785e-30	0.17	0	0.83	0	2.38	0	0.45	0.61	0.63	0	1.46	108.92	0.35	0	0.49	0	0.18	0.27	0.16	0	0.58	17.09
Plek	9	1.12	2.57543e-34	3.38773e-30	0.28	0.04	9.91	0.5	13.23	12.04	4.44	18.19	62.44	7.61	22.39	248.75	3.03	0.23	3.48	3.47	1.19	5.58	20.73	0.87	7.56	28.48
Spi1	9	0.75	5.51245e-34	7.25108e-30	0.18	0	2	0.12	1.45	0.18	0.67	0.25	0	8.14	1.22	114.31	0.6	0.08	0.49	0.08	0.18	0.14	0	0.65	0.58	17.72
Lgals3	9	1.43	1.31683e-33	1.73216e-29	0.37	0.11	25.18	2.08	66.14	43.15	30.13	66.85	215.98	72.75	33.01	525.49	7.4	0.45	14.82	10.49	7.22	16.87	43.51	6.93	11.34	36.71
Cd63	9	0.79	2.96139e-33	3.89541e-29	0.19	0.01	3.62	2.07	6.61	0	1.09	2.3	1.26	0	1.85	125.45	1.09	0.08	1.54	0	0.46	1.09	0.79	0	0.87	18.99
Pld4	9	0.7	3.1061e-32	4.08577e-28	0.14	0	0.46	0	0.91	0	0	0	0.37	0	0	101.39	0.15	0	0.24	0	0	0	0.32	0	0	13.92
Ms4a7	9	0.8	6.63702e-32	8.73033e-28	0.17	0	2.21	1.3	1.74	0	1.88	2.48	1.03	2.06	5.18	126.29	0.65	0.15	0.4	0	0.64	1.22	0.47	0.22	1.74	17.09
Marcks	9	1.29	6.77181e-32	8.90763e-28	0.26	0.03	13.05	3.11	25.51	2.4	3.18	10.14	0.29	8.91	36.63	301.14	3.38	0.83	6.48	0.85	1.1	3.81	0.16	0.65	11.05	25.95
Sirpa	9	0.95	1.53105e-30	2.01394e-26	0.15	0	0.83	0	2.24	0	0.54	0.37	0.42	3.99	0	159.44	0.3	0	0.65	0	0.18	0.14	0.32	0.22	0	15.19
Cd14	9	0.86	2.25134e-30	2.96142e-26	0.17	0.01	4.28	0	2.93	0	1.62	2.76	3	0	0.34	141.76	0.84	0	1.05	0	0.46	1.09	1.58	0	0.29	17.09
Ifi207	9	0.85	3.22093e-30	4.23681e-26	0.16	0	2.78	0	1.69	0	1.45	0.59	0.82	0	1.31	136.49	0.84	0	0.49	0	0.46	0.27	0.16	0	0.58	15.82
Gatm	9	0.63	4.72507e-30	6.21535e-26	0.14	0	0.45	0	0.86	0.38	0	3.45	0	0	0	88.37	0.15	0	0.32	0.17	0	1.22	0	0	0	13.92
Mt1	9	1.31	1.40982e-29	1.85448e-25	0.4	0.12	89.58	28.29	112.65	8.56	32.85	183.27	244.95	21.13	142.49	575.91	14.46	0.23	15.3	2.37	7.31	28.71	32.75	1.95	22.38	40.51
Bcl2a1a	9	0.82	7.51324e-29	9.88291e-25	0.15	0	2.1	0.12	0.69	0	0.42	1.95	1.59	0	1.64	130.12	0.7	0.08	0.16	0	0.09	0.54	0.32	0	0.87	14.56
Alox5ap	9	0.95	3.80216e-28	5.00137e-24	0.14	0	0.45	0.6	0.63	0.6	0.48	0.44	0.84	0	0	158.71	0.2	0.3	0.16	0.25	0.18	0.14	0.16	0	0	13.92
Lst1	9	1.01	8.20928e-28	1.07985e-23	0.18	0.02	3.9	5.5	5.57	7.02	6.09	7.53	9.59	8.26	5.55	191.07	1.69	2.19	2.19	3.05	2.29	3.81	4.75	0.87	2.33	17.72
Ifitm2	9	0.99	1.46732e-27	1.93012e-23	0.34	0.07	57.15	4.75	25.79	14.15	15.98	35	47.88	17.86	32.57	246.01	11.72	1.36	5.67	5.33	3.93	7.76	15.82	1.52	8.72	34.18
Cxcl2	9	1.81	2.41878e-27	3.18166e-23	0.38	0.08	387.95	0.8	80.19	19.25	31.35	67.46	147.02	1.68	248.02	1298.64	19.08	0.15	8.34	2.12	3.84	9.25	5.7	0.22	14.83	37.97
Tgfbi	9	0.89	3.41719e-27	4.49497e-23	0.15	0	1.3	1.08	3.04	0	0.45	1.88	0.58	3.18	0.74	146.86	0.45	0.08	0.57	0	0.18	0.95	0.16	0.22	0.29	14.56
Clec4n	9	0.71	1.2704e-26	1.67108e-22	0.13	0	1.31	0	1.33	0	1.13	0.9	0.58	0	0	104.19	0.5	0	0.4	0	0.27	0.41	0.16	0	0	13.29
Mpeg1	9	0.67	1.34836e-26	1.77363e-22	0.13	0	1.3	0.12	0.32	0.2	1.37	0.89	0.22	0	3.43	96.22	0.4	0.08	0.08	0.08	0.27	0.41	0.16	0	0.87	13.29
Ccl4	9	1.53	3.56554e-25	4.69011e-21	0.19	0.02	10.13	0	8.35	0.65	4.54	7.49	447.49	3.68	2.06	527.23	2.09	0	1.94	0.25	0.91	1.77	11.55	0.43	0.58	18.99
Nlrp3	9	0.72	4.9349e-25	6.49137e-21	0.12	0	1.3	0	0.43	0	1.01	1.27	0.52	3.52	0.37	108.07	0.5	0	0.16	0	0.18	0.27	0.32	0.22	0.29	12.03
C5ar1	9	0.61	4.96536e-24	6.53144e-20	0.13	0	1.31	1.08	1.53	0	0.56	1.53	0	0	1.82	86.39	0.45	0.08	0.49	0	0.18	0.54	0	0	0.87	12.66
Dab2	9	0.71	5.55795e-24	7.31093e-20	0.14	0	2.12	0	0.52	0	1.41	2.01	0	0	4.9	104.74	0.79	0	0.24	0	0.55	0.68	0	0	1.45	13.92
Ccl3	9	1.09	1.59974e-23	2.1043e-19	0.2	0.02	6.56	0	6.73	2.73	3.95	6.9	153.14	6.85	2.97	242.22	1.79	0	1.62	0.42	1.01	2.04	13.61	0.22	0.87	19.62
Cfp	9	1.18	1.72229e-23	2.2655e-19	0.13	0	0.27	2.37	0.49	1.87	1.19	0	0.54	15.74	0.73	232.58	0.1	0.6	0.16	0.76	0.37	0	0.32	0.87	0.29	13.29
Selenop	9	1	2.8894e-23	3.80072e-19	0.51	0.35	109.72	124.18	180.8	211.16	138.47	146.59	139.64	213.79	107.16	577.88	28.02	35.14	38.54	50.17	30.35	42.04	40.35	15.58	30.81	51.27
Rasgef1b	9	0.72	3.37807e-23	4.44352e-19	0.15	0.02	8.72	0.89	11.3	1.34	5.02	6.77	8.56	0	7.56	117.42	2.83	0.45	3.32	0.59	1.74	2.59	4.59	0	3.49	15.19
Pltp	9	0.65	6.1199e-23	8.05012e-19	0.14	0.01	1.65	2.57	3.66	0.87	2.26	3.65	0.33	0	4.08	95.81	0.55	0.08	0.89	0.34	0.73	1.77	0.16	0	1.45	13.92
Hck	9	0.7	9.30549e-23	1.22404e-18	0.12	0	0.32	0.12	0.69	0.25	0.63	0	0	3.99	0	102.99	0.1	0.08	0.16	0.08	0.18	0	0	0.22	0	12.03
Mrc1	9	0.65	2.8311e-22	3.72403e-18	0.11	0	1.58	0.21	0.53	0.11	0.9	0.23	0	0	0.65	93.12	0.4	0.08	0.16	0.08	0.27	0.14	0	0	0.29	11.39
Plau	9	0.82	3.61052e-22	4.74927e-18	0.12	0	1.62	2.11	3.62	0.15	2.37	0.52	0.57	0	0.86	129.55	0.55	0.15	0.81	0.08	0.73	0.27	0.32	0	0.29	12.03
Tmem176b	9	0.91	4.02279e-22	5.29158e-18	0.34	0.08	11.05	10.93	183.29	10.54	24.96	41.64	5.68	24.28	18.57	245.73	3.38	2.87	30.04	2.62	5.21	10.48	1.58	1.73	5.52	34.18
Ctsh	9	0.93	7.51916e-22	9.8907e-18	0.27	0.06	47.3	0	5.82	3.8	3.63	9.95	15.22	1.41	241.38	213.52	13.56	0	1.7	1.27	0.73	3.27	5.38	0.43	50.87	27.22
Ctss	9	0.77	1.51613e-21	1.99431e-17	0.44	0.3	50.2	148.95	56.83	162.13	80.46	131.78	190.75	144.43	34.19	343.66	16.64	45.02	17.65	47.63	22.49	40.68	54.11	12.34	12.5	44.3
C3ar1	9	0.7	2.36922e-21	3.11647e-17	0.11	0	1.61	0	0.4	0	0.4	1.02	0	0	3.14	101.78	0.55	0	0.08	0	0.18	0.41	0	0	1.16	10.76
Efhd2	9	0.79	4.37282e-21	5.752e-17	0.35	0.23	57.97	46.36	61.7	97.08	62.4	74.93	104.53	78.73	76.39	271.43	19.32	18.93	18.87	34.6	18.65	28.3	37.5	7.79	26.74	35.44
Ccl6	9	0.6	4.46122e-21	5.86828e-17	0.11	0	1.54	0	0.72	0	0.9	0.8	0.82	3.99	1.6	83.31	0.5	0	0.24	0	0.09	0.41	0.47	0.22	0.58	11.39
Ccl7	9	0.9	9.07991e-21	1.19437e-16	0.13	0.01	5.94	0	8.63	0	3.03	2.52	0	0	4.95	154.16	1.39	0	1.54	0	0.73	0.82	0	0	1.45	12.66
Rassf4	9	0.57	1.10473e-20	1.45316e-16	0.11	0	0.94	0.53	0.32	1.38	0	0	0	3.99	0	78.8	0.3	0.23	0.08	0.76	0	0	0	0.22	0	10.76
Tmem176a	9	0.85	2.80064e-20	3.68396e-16	0.27	0.05	7.53	8.11	97.55	8.68	12.26	28.24	1.97	11.03	9.51	186.72	2.33	1.73	20.65	2.37	3.38	7.89	0.79	1.08	3.2	27.22
Hmox1	9	1.04	3.00278e-20	3.94985e-16	0.14	0.03	10.77	0.61	11.13	6.69	4.91	5.95	18.76	36.96	10.36	209.49	3.63	0.15	3.24	2.62	1.46	2.72	9.18	0.65	4.36	13.92
Atp6v0c	9	0.6	7.2483e-20	9.53442e-16	0.61	0.6	360.79	158.56	344.6	180.46	327.31	389.58	251.1	139.94	394.04	600.13	68.41	49.92	65.1	52.96	60.6	75.65	67.41	13.64	74.42	60.76
Rab7b	9	0.57	1.09595e-19	1.44162e-15	0.11	0	1.57	0	0.73	0	1.04	3.17	0	0	0.94	79.19	0.6	0	0.16	0	0.27	0.82	0	0	0.29	10.76
Ncf2	9	0.56	3.66741e-19	4.82411e-15	0.15	0.02	8.07	1.12	3.29	4.49	1.17	6.29	8.98	2.29	3.87	82.91	2.83	0.45	0.97	1.69	0.55	2.86	4.59	0.43	1.45	15.19
Pla2g7	9	0.51	5.00188e-19	6.57947e-15	0.1	0	1.59	1.08	0.65	0.19	0	0.5	0	0	5.71	67.84	0.4	0.08	0.24	0.08	0	0.14	0	0	1.74	10.13
Ccl8	9	0.87	1.16905e-18	1.53776e-14	0.11	0.01	4.49	0	2.14	0	2.07	8.22	0.62	0	3.43	145.27	0.89	0	0.32	0	0.55	2.99	0.32	0	1.16	11.39
Cybb	9	0.75	1.44399e-18	1.89942e-14	0.19	0.04	10.72	2.32	6.7	31.88	14.34	17.93	20.88	20.49	2.77	141.36	3.43	1.06	2.35	11	4.66	6.67	8.23	1.73	1.45	18.99
Ccl2	9	0.86	2.1126e-18	2.77891e-14	0.13	0.01	6.66	12.4	4.25	0	2.6	1.2	0.8	0	3.53	148.07	1.44	0.08	1.05	0	0.55	0.54	0.16	0	1.45	12.66
Atf3	9	1.28	2.94291e-18	3.8711e-14	0.39	0.15	193.52	5.86	201.1	2.58	44.89	41.69	42.27	4.19	148.46	582.72	32.89	0.23	28.5	0.25	10.05	12.93	10.76	0.87	26.74	38.61
Creg1	9	0.93	4.2689e-18	5.61531e-14	0.18	0.1	35.19	24.45	25.96	30.13	23.06	20.08	20	32.04	52.6	226.02	11.62	9.5	9.15	11.42	7.5	9.39	8.86	1.52	17.15	17.72
Atox1	9	0.77	6.72857e-18	8.85076e-14	0.45	0.37	92.42	128.4	125.91	169.79	95.03	156.58	233.65	188.68	122.81	406.47	27.47	40.8	33.93	49.92	26.33	49.66	65.82	15.8	38.95	44.94
Marcksl1	9	1.09	1.03408e-17	1.36023e-13	0.24	0.07	31.16	11.37	29.96	32.71	27.03	29.95	29.81	19.95	7.76	275.1	8.15	2.87	7.85	9.56	7.68	9.52	11.71	1.95	2.62	24.05
Vcam1	9	1.11	1.27232e-17	1.6736e-13	0.13	0.01	6.27	0.12	4.43	0.38	1.48	2.95	0.72	15.94	1.21	214.78	2.19	0.08	0.4	0.25	0.46	1.36	0.32	0.22	0.58	12.66
Blvrb	9	0.77	1.44444e-17	1.90002e-13	0.14	0.03	6.45	11.81	6.08	5.86	6.26	7.57	10.23	34.02	4.7	133.82	2.33	4.9	2.02	2.88	2.19	3.27	4.91	2.6	2.03	13.92
Lgmn	9	0.84	3.23631e-17	4.25705e-13	0.3	0.1	38.73	9.24	51.88	25.89	8.71	18.43	3.17	12.17	438.79	224.12	11.82	4.07	11.66	9.81	3.29	6.67	1.9	1.52	69.19	29.75
Napsa	9	0.57	3.83727e-17	5.04755e-13	0.1	0.01	2.15	0.42	1.4	1.04	0.1	2.3	5.21	4.19	2.09	79.36	0.99	0.15	0.49	0.51	0.09	0.95	2.53	0.22	0.87	10.13
Litaf	9	0.88	9.811e-17	1.29054e-12	0.35	0.16	80.97	11.61	92.31	25.3	37.33	206.04	241.84	17.09	27.89	322.72	16.44	3.7	17.98	10.41	7.77	35.78	54.75	2.6	8.43	35.44
App	9	0.52	3.21169e-16	4.22465e-12	0.11	0	0.68	3.9	2.75	3.09	1.72	0.53	0	4.2	1.59	71.92	0.25	0.9	0.57	1.1	0.55	0.14	0	0.43	0.58	10.76
Dnase1l3	9	0.5	5.33558e-16	7.01842e-12	0.13	0.01	8.65	1.21	0.26	4.07	3.29	10.35	1.47	0	2	72.48	2.98	0.08	0.08	1.61	0.91	2.31	0.63	0	0.87	13.29
Cd81	9	0.83	5.42598e-16	7.13734e-12	0.41	0.23	126.6	65.53	39.03	116.76	41.06	63.87	185.81	61.18	129.96	334.97	30.5	23.6	10.28	30.63	11.43	21.36	42.88	5.84	29.65	41.14
Plekho1	9	0.78	8.25e-16	1.0852e-11	0.13	0.02	1.82	6.29	4.98	14.98	6.18	6.4	4.5	14.78	1.52	132.99	0.84	2.26	1.54	6.43	1.92	2.99	2.85	1.3	0.58	13.29
Anxa5	9	0.64	1.38566e-15	1.8227e-11	0.36	0.28	82.08	66.97	107.29	115.5	70.03	95.45	117.53	112.47	82.23	261.75	25.04	23.76	28.99	36.38	20.84	33.47	44.46	10.17	27.33	36.08
Csf2ra	9	0.57	2.26284e-15	2.97653e-11	0.11	0.02	8.55	5.05	10.74	8.42	4.49	5.34	3.15	10.26	4.77	90.26	2.63	2.71	2.83	3.3	1.65	2.72	2.06	1.08	1.74	11.39
Plaur	9	0.68	2.76575e-15	3.63806e-11	0.13	0.02	12.56	3.49	6.54	2.17	10.44	0.86	1.73	0	2.17	110.1	3.33	1.36	1.54	0.59	2.56	0.41	0.63	0	0.87	13.29
Gpx1	9	0.71	6.91111e-15	9.09088e-11	0.61	0.53	172.3	226.39	467.9	279.57	225.96	283.76	295.81	312.35	189.86	645.24	40.83	60.03	64.86	61.51	42.87	61.63	66.14	22.08	46.8	60.76
Grn	9	0.68	1.74261e-14	2.29223e-10	0.15	0.09	16.2	5.64	40.66	24.61	12.58	43.67	48.2	36.86	30.47	145.82	6.56	2.79	12.96	9.64	5.48	17.82	21.36	4.33	11.63	14.56
Sat1	9	0.7	2.53626e-14	3.33619e-10	0.5	0.47	186.74	156.69	229.58	179.25	189.4	231.14	306.23	151.26	238.99	503.89	44.71	45.63	48.1	50.93	41.77	59.46	66.46	14.5	56.1	50
Irf8	9	0.79	1.09508e-13	1.44046e-09	0.2	0.06	9.48	10.22	14.5	20.86	18.38	28.26	127.75	20.09	2.27	171.47	2.73	3.17	4.53	5.75	4.84	9.39	28.64	2.38	1.45	19.62
Tnf	9	0.81	1.20382e-13	1.58351e-09	0.11	0.07	20.43	9.28	53.29	23.99	28.71	15.97	56.48	22.54	8.54	185	5.66	4	11.66	6.35	5.67	5.31	18.83	1.73	2.91	11.39
Ms4a6c	9	0.61	1.74122e-13	2.2904e-09	0.16	0.03	6.63	19.56	5.16	15.83	6.71	3.65	6.75	20.77	8.38	101.77	2.33	7.54	1.7	5.5	1.92	1.9	3.32	2.16	3.2	15.82
Irf5	9	0.64	3.41319e-12	4.48971e-08	0.26	0.13	81.26	9.82	34.1	38.58	23.25	45.88	35.97	20.12	49.4	168.5	24.29	3.39	10.45	15.65	7.59	16.46	15.82	1.95	15.12	25.95
Ier3	9	0.74	5.23331e-12	6.8839e-08	0.13	0.02	11.62	4.72	10.54	16.14	2.88	3.11	41.4	1.49	26.84	132.89	2.83	0.15	1.78	2.45	0.73	0.82	6.65	0.22	4.65	13.29
Ckb	9	0.68	1.19647e-10	1.57384e-06	0.2	0.1	18.03	12.77	88.74	16.66	24.46	43.37	27.71	36.7	31.01	160.56	6.91	5.13	23.89	5.25	7.77	16.19	12.5	3.25	11.63	19.62
Txn1	9	0.52	1.90231e-10	2.5023e-06	0.49	0.44	183.73	101.95	192.16	155.97	141.69	246.3	374.99	170.33	170.64	374.67	43.96	35.82	42.83	46.28	34.28	59.73	73.1	13.64	47.09	48.73
Rab20	9	0.52	2.00297e-10	2.6347e-06	0.22	0.08	40.04	6.74	36.56	6.39	16.78	25.53	27.81	9.8	57.1	109.51	12.07	2.79	9.64	2.54	4.84	10.88	12.34	1.08	16.28	21.52
Egr1	9	1.08	2.37385e-10	3.12256e-06	0.24	0.12	30.41	67.53	96.81	104.36	59.48	34.99	171.54	54.5	42.71	400.45	8.15	10.86	11.26	12.94	8.41	10.75	35.6	3.68	12.21	24.05
Il1r2	9	0.51	3.1066e-10	4.08642e-06	0.23	0.1	54.13	0.35	34.53	17.41	23.62	287.74	148.73	2.41	21.69	160.66	11.08	0.15	8.1	5.16	5.85	40	29.27	1.08	4.36	22.78
Cstb	9	0.62	7.81587e-10	1.0281e-05	0.37	0.29	93	51.59	130.38	80.62	92.68	126.26	148.93	75.35	94.61	265.88	26.63	20.97	31.66	29.7	23.58	42.59	50.95	7.79	28.78	37.34
Cebpb	9	0.53	1.55177e-09	2.04119e-05	0.57	0.43	219.39	40.98	491.11	140.3	405.81	329.01	338.32	78.28	218.43	499.88	43.32	12.67	62.27	35.11	53.11	60.14	66.14	6.49	42.73	56.96
Atpif1	9	0.58	1.2751e-08	0.000167726	0.37	0.28	68.16	68.75	107.78	147.17	89.77	103.14	127.41	168.77	88.46	257.4	21.51	24.43	28.26	41.2	24.77	36.19	42.56	12.77	28.78	37.34
Clic4	9	0.53	2.85751e-08	0.000375877	0.21	0.11	26.34	24.58	65.14	8.3	34.39	69.5	50.91	13.23	28.76	128.66	8.54	8.3	16.6	3.38	10.15	22.72	21.04	1.73	8.72	20.89
Sdc4	9	0.53	3.43035e-08	0.000451229	0.44	0.3	251.15	18.43	296.91	32.45	59.51	224.96	93.29	17.95	231.7	316.02	48.19	6.94	51.74	9.39	14.72	52.38	29.59	2.38	49.42	43.67
Lyn	9	0.65	5.80247e-07	0.00763257	0.31	0.18	172.67	1.69	102.29	16.98	31.01	77.72	49.84	5.03	249.43	240.27	38.05	0.23	23.08	6.26	8.41	21.5	18.2	0.87	48.84	31.01
