# Supplementary material for: Immunomodulatory effects of PI3Kδ inhibition in solid tumors – evaluation in a randomized phase II trial
Source: Research Square preprint supplement (doi:10.21203/rs.3.rs-337290/v1), 2021-03-19
Supplement: Supplementary file 7 [file 4ec44bbb7166886faf2bf794.xlsx]

## Sheet: GSEA
Table S4. Gene Set Enrichment Analysis.
Reactome negative regulation of the PI3k:akt network
> Negative regulation of the PI3K/AKT network
AKT1
AKT2
AKT3
AREG
BTC
CD19
CD28
CD80
CD86
EGF
EGFR
EPGN
ERBB2
ERBB3
ERBB4
EREG
ESR1
ESR2
FGF1
FGF10
FGF16
FGF17
FGF18
FGF19
FGF2
FGF20
FGF22
FGF23
FGF3
FGF4
FGF5
FGF6
FGF7
FGF8
FGF9
FGFR1
FGFR2
FGFR3
FGFR4
FRS2
FYN
GAB1
GRB2
HBEGF
HGF
ICOS
IER3
IL1RAP
IL1RL1
IL33
INS
INSR
IRAK1
IRAK4
IRS1
IRS2
KIT
KITLG
KL
KLB
LCK
MAPK1
MAPK3
MET
MYD88
NRG1
NRG2
NRG3
NRG4
PDGFA
PDGFB
PDGFRA
PDGFRB
PHLPP1
PHLPP2
PIK3AP1
PIK3CA
PIK3CB
PIK3CD
PIK3R1
PIK3R2
PIK3R3
PIP4K2A
PIP4K2B
PIP4K2C
PIP5K1A
PIP5K1B
PIP5K1C
PPP2CA
PPP2CB
PPP2R1A
PPP2R1B
PPP2R5A
PPP2R5B
PPP2R5C
PPP2R5D
PPP2R5E
PTEN
PTPN11
RAC1
RAC2
RHOG
SRC
STRN
TGFA
THEM4
TRAF6
TRAT1
TRIB3
VAV1

## Sheet: IPA
Table S4. Ingenuity Pathway Analysis.
© 2000-2020 QIAGEN. All rights reserved.
Upstream Regulator	Expr Log Ratio	Molecule Type	Predicted Activation State	Activation z-score	Flags	p-value of overlap	Target Molecules in Dataset	Mechanistic Network
CSF2		cytokine	Activated	4.921	bias	3.23e-13	ARRB1,CASC3,CCL4,CCR2,CCR7,CD14,CD40LG,CD69,CD86,CDK1,CDKN1A,CXCL8,CXCR4,CYBB,EXO1,FBXO5,FOS,HJURP,IFNG,IL1B,IL1RN,IL2RA,IRF5,LTA,MPP1,NCAPH,NET1,ODC1,OSM,PLAUR,PLD1,PRC1,RECQL4,RIPK2,SKA1,SPP1,TGFBI,TNFRSF4,TPX2,TRIP13	126 (16)
IL2		cytokine	Activated	3.557	bias	1.52e-12	APOBEC3G,ARHGAP12,CAPG,CCL4,CCR2,CCR7,CCR8,CD160,CD40LG,CD59,CD69,CD86,CDKN1A,CXCL8,CXCR1,CXCR4,EPAS1,EXOSC9,FCER1G,FOS,GZMB,IFNG,IL12RB2,IL1B,IL2RA,IL7R,LTA,NET1,OSM,PIK3R3,POLR1B,PRF1,PUS1,RGS2,RHOB,RORC,S100A8,SOS2,SPP1,SWAP70,TIMP1,TNFRSF4,UMPS	109 (16)
TCR		complex	Activated	2.054	bias	1.44e-11	ABCD1,BACH2,CCL4,CCR2,CCR7,CCR8,CD40LG,CD69,CXCL8,CXCR4,ENO1,F5,FOS,GNPDA1,GZMB,IFNG,IL12RB2,IL2RA,IL7R,LTA,MAP3K8,ODC1,PGK1,PIK3R3,PRF1,RIPK1,SPP1,TNFRSF4,TRAF3,TXK,ZBTB32	122 (20)
IL4		cytokine		1.909	bias	5.27e-11	CAPG,CCL4,CCR7,CCR8,CD14,CD300A,CD40LG,CD69,CD86,CDK1,CDKN1A,CPOX,CXCL8,CXCR1,CXCR4,CYBB,CYRIA,EPAS1,FCER1G,FN1,FOS,HPGD,IFNG,IGHG2,IL12RB2,IL1B,IL1RN,IL2RA,IL4I1,IL7R,IRF5,IRF8,LGALS1,LGALS3BP,LTA,MAL,NUP214,OSM,PLD1,PRF1,S100A8,S100A9,SERPINB6,SKA1,SPP1,SWAP70,SYK,TGFBI,TIMP1,TMED8,TNFRSF4,TRAF3,TXK	123 (17)
phytohemagglutinin		chemical drug	Activated	4.526	bias	6.12e-11	CCL4,CCR2,CCR7,CD69,CXCL8,CXCR4,FOS,GZMB,HPGD,IFNG,IL12RB2,IL1B,IL2RA,IL7R,KIF23,LOC102724159/PWP2,LTA,NFYB,NRIP1,NUP214,PLD1,POLR3A,PON2,PRF1,RIPK1,SPP1,TIMP1	112 (16)
ZFP36		transcription regulator	Inhibited	-3.528	bias	2.4e-10	CDKN1A,CYBB,E2F1,FOS,IFNG,IL1B,KIF14,NUF2,OSM,PBK,PLAUR,PRC1,S100A8,S100A9,SPP1	146 (20)
infliximab		biologic drug	Inhibited	-3.274	bias	3.81e-10	CXCL8,GNLY,GZMB,IFNG,IL12RB2,IL1B,IL2RA,LAG3,LTA,PRF1,RORC,SLC27A2,TNFRSF4	134 (18)
FOXP3		transcription regulator		0.17		4.74e-10	CAPG,CCR2,CCR7,CCR8,CD40LG,CD69,CDKN1A,CXCR4,FOS,IFNG,IL12RB2,IL2RA,IL7R,LAG3,LGALS1,LTA,RORC,SLCO4A1,SWAP70,TNFRSF4	117 (15)
PTGER2		G-protein coupled receptor	Activated	2.082	bias	1.44e-09	CCNB2,CCR7,CXCL8,CXCR4,ECT2,IFNG,IL1B,KIF18B,NUF2,PBK,PRC1,RRN3,SPP1,TIMP1,TPX2	112 (18)
CISH		other	Inhibited	-2.716	bias	1.69e-09	BACH2,CCL4,CD14,IFNG,IL1B,IL2RA,LTA,MPP1,OSM,PLAUR,PRF1,SPP1,TGFBI	111 (16)
IL21		cytokine	Activated	3.85	bias	1.92e-09	CCL4,CCR7,CD40LG,CD69,CD86,CDKN1A,CXCL8,FCER1G,GZMB,IFNG,IGHG2,IL12RB2,IL2RA,IL4I1,IL7R,IRF5,PRF1,RORC,TRAF3	103 (17)
calcitriol		chemical drug		-0.326		3.33e-09	C15orf48,CCR8,CD14,CD69,CDK1,CDKN1A,CPOX,CXCL8,CYBB,ECT2,EXO1,FN1,FOS,GEM,HPGD,IFNG,IL1B,IL1RN,IL2RA,KIF23,LGALS1,MAL,NDC1,ODC1,PBK,PLD1,PRC1,RORC,S100A8,S100A9,SERPINB6,SLC9A1,SPP1,TK1,TPX2,UMPS	117 (17)
IL27		cytokine		1.737	bias	3.97e-09	BST2,CCL4,CD14,CD69,CD86,CXCL8,FOS,GZMB,HPGD,IFNG,IL12RB2,IL1B,IL1RN,IL2RA,LAG3,RORC,TNFRSF4	101 (16)
HGF		growth factor	Activated	3.691	bias	4.38e-09	ATF3,CCL4,CDK1,CDKN1A,CGRRF1,CXCL8,CXCR4,FANCG,FN1,FOS,GEM,IFNG,IL1B,IRF8,ITPR1,LTA,MAP3K8,NDC80,NRIP1,PGK1,PLAUR,PRC1,RGS2,RHOB,S100A9,SMAD5,SPP1,TIMP1,TMEM97,TPX2,TRIB1,TRIP13	115 (18)
dextran sulfate		chemical drug		1.162	bias	4.87e-09	CCL4,CCR2,CD14,CD40LG,CD86,CDK1,CXCL8,EXO1,FANCB,FBXO5,HJURP,IFNG,IL1B,NCAPH,ODC1,PARP2,PRC1,RECQL4,S100A8,S100A9,SKA1,TPX2,TRIP13	119 (18)
IL12 (complex)		complex	Activated	3.912	bias	5.38e-09	CCL4,CCR2,CCR7,CD40LG,CD69,CD86,CXCL8,FOS,GZMB,IFNG,IL12RB2,IL1B,IL2RA,IL7R,IRF8,LTA,MAP3K8,PRF1,TIMP1,TXK	111 (16)
amphotericin B		chemical drug		0.826	bias	5.63e-09	CCL4,CXCL8,IFNG,IL1B,IL1RN,SPP1,TIMP1	105 (16)
SELPLG		other	Activated	2.335	bias	7.52e-09	CCL4,CD160,CDKN1A,CXCL8,CXCR4,FOS,IFNG,IL1B,LAG3,PLAUR	118 (20)
dexamethasone		chemical drug		0.414		1.08e-08	AACS,ABHD2,ADAM12,ALDH1B1,ARRB1,ATF3,CCL4,CCR2,CD59,CD69,CD86,CDKN1A,CLU,CREG1,CXCL8,CXCR1,CXCR4,CYBB,DHCR24,ECT2,ELOVL6,ENO1,EPAS1,F5,FANCE,FCER1G,FN1,FOS,GEM,GOT1,GZMB,HMCES,HPGD,HSPA6,IFNG,IL1B,IL1RAP,IL1RN,IL2RA,IL7R,IRF5,IRF8,ITPR1,JARID2,KIF14,LAG3,LGALS1,LGALS3BP,LTA,MS4A6A,NCAPH,NDC80,NET1,NRIP1,NUF2,ODC1,OSM,P4HA2,PDGFRB,PLAUR,PLD1,RASD1,RGS2,S100A8,S100A9,SLC27A2,SLC35D1,SLC43A1,SLC9A1,…	135 (20)
MAPK1		kinase		1.652		1.22e-08	ADAM12,ATF3,BST2,CCL4,CCR8,CD69,CDKN1A,CXCL8,E2F1,FN1,FOS,IFI27,IFNG,IL1B,IL1RN,IL2RA,LAG3,LGALS1,LGALS3BP,NKG7,OSM,PLD1,RGS2,SHCBP1,SLC27A2,SPAG16,SPP1	91 (13)
MAPK3		kinase		1.488	bias	1.32e-08	CD69,CD86,CDKN1A,CXCL8,E2F1,FN1,FOS,IFNG,IL2RA,PLAUR,RGS2,SPP1,TIMP1	91 (15)
IL12 (family)		group	Activated	3.345	bias	1.35e-08	ATF3,CCL4,CD40LG,CD69,CD86,GZMB,IFNG,IL12RB2,IL1B,IL2RA,IRF8,KAT2B,NKG7,PRF1,RORC,TAB2	88 (19)
Immunoglobulin		complex		1.394		1.44e-08	CAPG,CCL4,CCR2,CCR7,CD14,CD40LG,CD69,CD86,CXCL8,CXCR1,CXCR4,ENO1,FCER1G,FN1,FOS,GZMB,HSPA6,IFNG,IL1B,IL1RN,IL2RA,IL7R,IRF5,IRF8,LAG3,LGALS3BP,LTA,OSM,PGK1,PRF1,RBKS,RGS2,RORC,S100A8,S100A9,SPP1,TIMP1,TNFRSF4	128 (17)
cyclosporin A		biologic drug		-1.655		2.14e-08	ATF3,CCL4,CCR7,CD14,CD40LG,CD86,CDKN1A,CLU,CXCL8,CXCR4,F5,FN1,FOS,GNPDA1,GTPBP4,GZMB,IFNG,IL12RB2,IL1B,IL2RA,ITPR1,LTA,ODC1,PERP,PRF1,RORC,S100A9,SPP1,TIMP1	113 (16)
Klrk1		transmembrane receptor	Activated	2.985	bias	2.16e-08	CCL4,IFNG,IL12RB2,IRF8,LAG3,NKG7,PRF1,SPP1,TXK	81 (7)
IL18		cytokine	Activated	3.631	bias	2.23e-08	ATF3,CCL4,CCR7,CD40LG,CD69,CD86,CXCL8,GZMB,IFNG,IL12RB2,IL1B,IL2RA,NKG7,PRF1,SPP1,TAB2,TIMP1,TXK	138 (18)
SATB1		transcription regulator		0.324		3.05e-08	CD69,CD86,CDKN1A,CYBB,ENOSF1,EPAS1,F5,IL2RA,IL7R,IRF8,LAG3,MAL,RIPK1,SLC27A2,TAF4B,TMEM117,WARS1	78 (7)
lipopolysaccharide		chemical drug	Activated	5.784	bias	4.16e-08	APOBEC3G,ATF3,BACH2,BAG3,CCL4,CCNB2,CCR2,CCR7,CCR8,CD14,CD160,CD40LG,CD59,CD69,CD86,CDKN1A,CREG1,CXCL8,CXCR1,CXCR4,CYBB,DHCR24,DRAM1,E2F1,ENO1,FCER1G,FN1,FNDC3B,FOS,GEM,GZMB,HDAC9,HMGB2,HPGD,IFI27,IFNG,IL12RB2,IL1B,IL1RAP,IL1RN,IL2RA,IL4I1,IL7R,IRF5,IRF8,KIF23,LGALS1,LGALS3BP,LTA,MAP3K8,MCM10,ODC1,OSM,PBK,PERP,PHLDB2,PLAUR,PLD1,PRC1,RGS2,RHOB,RIPK2,S100A8,S100A9,SLC9A1,SPP1,STS,SWAP70,TAF4B,TIMP1…	135 (17)
PRDM1		transcription regulator		0.758		4.17e-08	CCR7,CD160,CD86,CXCR4,F5,FOS,GNLY,GPAT3,IFNG,IL1B,IL7R,IRF8,ITPR1,LAG3,LGALS1,LHX4,PRF1,S100A8,S100A9,SWAP70,TRIB1	116 (20)
FOS	0.922	transcription regulator		1.462	bias	4.32e-08	ADAM12,ATF3,BCL9,CD14,CLU,CTNND1,CXCL8,CXCR1,ELOVL6,ENO1,EPAS1,FN1,FOS,HPGD,IFNG,IL1B,LGALS3BP,LIN9,MALAT1,NET1,NRIP1,ODC1,PLAUR,PLD1,RIPK1,S100A8,S100A9,SMAD5,SPP1,STK3,SWAP70,TGFBI,TIMP1	140 (17)
ZBTB17		transcription regulator				6.08e-08	CCNB2,CDK1,CDKN1A,ECT2,KIF18B,NCAPH,NDC80,NUF2,ODC1,PBK,PRC1,TPX2	119 (11)
NFkB (complex)		complex	Activated	3.739	bias	6.46e-08	ALDH1B1,ATF3,CCL4,CCNB2,CCR2,CCR7,CD40LG,CD69,CD86,CDKN1A,CLU,CXCL8,CXCR4,CYBB,EPAS1,FN1,FOS,HDAC9,IFNG,IL1B,IL1RN,IL2RA,IL7R,ITPR1,LTA,MAP3K8,ODC1,PIP5K1A,PLAUR,PLD1,RRAS,SPP1,TIMP1,TNFRSF4,TRAF3	146 (20)
NFKB1		transcription regulator	Activated	3.026	bias	7.33e-08	CCL4,CD59,CD86,CDKN1A,CXCL8,CXCR1,CYBB,E2F1,EPAS1,FN1,FOS,HOOK2,IFNG,IL1B,IL1RN,IL2RA,ITPR1,LGALS1,LTA,MAP3K8,TK1,TNFRSF4	124 (17)
prostaglandin E2		chemical - endogenous mammalian		0.999	bias	8.74e-08	ATF3,CCL4,CCR7,CCR8,CD14,CD69,CD86,CDKN1A,CXCL8,CXCR4,FN1,FOS,IFNG,IL1B,IL1RN,IL2RA,IL4I1,IL7R,OSM,RGS2,RORC,S100A8,SPP1	107 (17)
CDKN2A		transcription regulator		-1.29		9.88e-08	AMD1,CAPG,CCL4,CCR7,CCR8,CD40LG,CDK1,CDKN1A,E2F1,FBXO5,FOS,HMGB2,IFNG,IL1B,LIN9,LTA,ODC1,P4HA2,PDGFRB,RECQL4,TK1,TMEM97	156 (21)
IL10		cytokine		1.457		9.89e-08	CCL4,CCR2,CCR7,CCR8,CD14,CD86,CDKN1A,CXCL8,CXCR4,FCER1G,FOS,GZMB,HDAC9,HMGB2,HPGD,IFNG,IL12RB2,IL1B,IL1RN,IL7R,LAG3,LGALS1,MAP3K8,NDC80,OSM,S100A8,SPP1,TIMP1	123 (16)
AKT1		kinase	Activated	2.916	bias	1.11e-07	CCL4,CD69,CD86,CDKN1A,CLU,CXCL8,CXCR4,DIAPH3,E2F1,ENO1,FN1,FOS,HMGB2,IFNG,IL2RA,NDC80,PDGFRB,RHOB,SPP1,TIMP1,TK1,UBE4B	91 (15)
Tgf beta		group		1.55	bias	1.25e-07	ADAM12,CCL4,CCR2,CCR7,CD69,CDKN1A,CLU,CXCL8,CXCR4,FN1,FOS,GZMB,IFNG,IL1B,IL1RN,RHOB,RNF111,RORC,SPP1,TAF4B,TGFBI,TIMP1	108 (15)
camptothecin		chemical drug		1.751	bias	1.4e-07	AKAP9,ATF3,CD59,CD86,CDK1,CDKN1A,CTNND1,CXCL8,E2F1,F5,FNDC3B,FOS,HAUS3,HJURP,IL1B,IL1RAP,IL2RA,ITPR1,MIR22HG,OSM,PERP,PHF21A,PLD1,PLD2,RECQL4,RIPK1,RIPK2,SPP1,STK3,SYK,TGFBI,TRAF3,TRIB1	151 (21)
PGR		ligand-dependent nuclear receptor	Activated	2.619	bias	1.4e-07	AMD1,CCNB2,CD59,CDK1,CDKN1A,CXCL8,CYRIA,EPAS1,FN1,FOS,GOT1,HPGD,IFI27,KRT5,NET1,NQO2,P4HA2,PHF21A,S100A8,SLC9A1,TGFBI,TK1	148 (21)
perillic acid		chemical - endogenous non-mammalian				1.41e-07	CD40LG,CD69,IL1B,IL2RA
BRD4		kinase	Activated	3.111	bias	1.46e-07	ALDH1B1,CXCR4,FN1,FOS,GINS1,IL2RA,IL7R,IRF8,JARID2,KDM3A,KIF23,MAL,PDGFRB,SFXN4,TIMP1	76 (7)
CD28		transmembrane receptor	Activated	4.464	bias	1.51e-07	CCL4,CD40LG,CD69,CD86,CXCL8,CXCR1,CXCR4,FCER1G,FOS,GTPBP4,GZMB,HCCS,IFNG,IL12RB2,IL1B,IL1RAP,IL2RA,IL4I1,IL7R,IRF8,LTA,ODC1,RORC,SRGN	103 (18)
IFNG	1.82	cytokine	Activated	4.433	bias	1.7e-07	APOBEC3G,ATF3,BACH2,BST2,CCL4,CCR2,CD14,CD40LG,CD86,CDK1,CDKN1A,CENPJ,CXCL8,CXCR4,CYBB,E2F1,ENO1,ERCC8,FBXO5,FCER1G,FN1,FOS,GZMB,HDAC9,HSP90AB1,IFI27,IFNG,IL12RB2,IL1B,IL1RN,IL2RA,IL4I1,IL7R,IRF5,IRF8,ITPR1,KIF23,LAG3,LGALS3BP,LTA,MAP3K8,ODC1,OSM,PBK,PLAUR,PLD1,PSEN2,RHOB,RIPK1,RIPK2,RORC,S100A8,S100A9,SPP1,TIMP1,TXK,UBE4B,WARS1	109 (15)
IL12B		cytokine	Activated	2.027	bias	1.87e-07	CD86,CXCL8,GZMB,IFNG,IL1B,LTA,MAP3K8,RORC,S100A8,S100A9	90 (14)
E. coli B5 lipopolysaccharide		chemical - endogenous non-mammalian	Activated	2.587	bias	2.2e-07	CCL4,CCR7,CCR8,CD69,CD86,CDKN1A,CXCL8,CXCR4,CYBB,FOS,IFNG,IL12RB2,IL1B,IL1RAP,IL2RA,IL7R,MAP3K8,RHOB,SEPHS2,SPP1	95 (15)
REL		transcription regulator		1.934	bias	2.35e-07	BACH2,CCL4,CCR8,CD40LG,CD59,CD86,CDKN1A,CXCL8,FBXL4,FN1,FOS,IFNG,IL1B,IL2RA,IRF5,IRF8,MAP3K8,RORC,TNFRSF4	130 (16)
TLR3		transmembrane receptor	Activated	2.969	bias	2.48e-07	ATF3,CCL4,CD69,CD86,CLU,CXCL8,DISC1,FOS,IFNG,IL1B,IL1RN,MAP3K8,PIK3R3,RHOB,RIPK1,S100A8,STYK1,TIMP1,TRAF3,ZBTB32	101 (14)
BCL6		transcription regulator		-0.699		2.51e-07	BACH2,CCL4,CCR7,CCR8,CD69,CDKN1A,HDAC9,IFNG,IL1B,IL2RA,IL7R,IRF8,MIR17HG,RORC,SLC27A2,SYK,TBPL1,TIMP1,VWA5A	109 (19)
peptidoglycan		chemical - endogenous non-mammalian	Activated	2.989	bias	2.53e-07	CCL4,CCR8,CD69,CD86,CXCL8,CXCR4,FOS,IFNG,IL1B,IL1RN,IL2RA,S100A8,S100A9	90 (15)
TNFRSF8		transmembrane receptor		0.422		2.59e-07	CCL4,CCR7,CDKN1A,CXCL8,CXCR4,GZMB,IFNG,NKG7,ODC1,PRF1	95 (16)
STAT3		transcription regulator		1.585	bias	3.03e-07	BST2,CCDC88A,CCL4,CD40LG,CD86,CDK1,CDKN1A,CXCL8,CXCR1,CXCR4,ECT2,EPAS1,FCER1G,FN1,FOS,GZMB,IFI27,IFNG,IL1B,IL1RN,IL2RA,IRF5,KAT2B,LTA,PGK1,PLAUR,PRF1,RORC,S100A9,SOS2,SPP1,TIMP1,WARS1	108 (20)
tetradecanoylphorbol acetate		chemical drug	Activated	4.896	bias	3.41e-07	APOBEC3G,ATF3,CAPG,CCL4,CCR2,CCR7,CD14,CD40LG,CD69,CDK1,CDKN1A,CXCL8,CXCR1,CXCR4,CYBB,E2F1,FCER1G,FOS,GEM,GZMB,HJURP,HSP90AB1,IFNG,IL12RB2,IL1B,IL1RN,IL2RA,IL4I1,IL7R,IRF8,ITGAD,KAT2B,LTA,ODC1,OSM,PDGFRB,PLAUR,PLD1,PRF1,RECQL4,RGS2,RORC,S100A8,S100A9,SPP1,SRGN,STS,TIMP1,TK1,TRAF3	133 (17)
CD40LG	10.189	cytokine	Activated	2.521	bias	3.49e-07	APOBEC3G,ATF3,CCL4,CCR2,CCR7,CD40LG,CD69,CD86,CDKN1A,CLU,CXCL8,CXCR4,FOS,GZMB,IFNG,IL1B,IL1RAP,IL2RA,IL7R,LTA,NET1,PLAUR,RGS2,SWAP70,TRAF3	100 (16)
ID3		transcription regulator		-0.185		3.91e-07	CCR7,CCR8,CD40LG,CDK1,CDKN1A,CXCL8,CXCR4,ELOVL6,FCER1G,IFNG,IL7R,IRF5,IRF8,LGALS1,LTA,TNFRSF4,TRAF3	94 (14)
XDH		enzyme		-0.579		4.51e-07	CD69,CXCL8,CXCR4,CYBB,IL1B,IL2RA,PLAUR,SPP1	100 (17)
Go 6976		chemical - kinase inhibitor	Inhibited	-2.934	bias	4.8e-07	APOBEC3G,CCL4,CDKN1A,CXCL8,CYBB,FN1,FOS,IFNG,PLD1,TNFRSF4	90 (14)
glucocorticoid		chemical drug		-0.926		4.93e-07	CD40LG,CD69,CDKN1A,CLU,CXCL8,CXCR4,FN1,GOT1,GZMB,IFNG,IL1B,IL1RN,IL2RA,IRF8,KRT5,LAG3,LTA,ODC1,RASD1,SPP1,TK1	99 (17)
KLF2		transcription regulator		-0.349		5.84e-07	CCL4,CCR2,CCR7,CCR8,CD40LG,CD86,CDKN1A,CXCL8,CXCR4,EPAS1,IFNG,IL1B,IL7R,PRF1,TIMP1,TNFRSF4	83 (14)
EP300		transcription regulator	Activated	2.761	bias	6.2e-07	ADAM12,CAPG,CCR7,CD160,CD59,CDKN1A,CXCL8,CXCR4,E2F1,FN1,FNDC3B,FOS,HSP90AB1,IL2RA,IL7R,KDM3A,LGALS3BP,LTA,MAP3K8,PDGFRB,PERP,RORC,SLC43A1,TBX19,TK1,WFS1	102 (17)
ICAM5		other		-1		6.94e-07	CD40LG,CD69,IFNG,IL2RA
discodermolide		chemical drug				6.94e-07	CCNB2,CDK1,CDKN1A,FANCB,FANCG,KIF23,PRC1,RFC5	99 (7)
doxorubicin		chemical drug	Activated	2.048	bias	7.04e-07	ATF3,CCNB2,CD14,CDK1,CDKN1A,CLU,CXCL8,CYBB,DRAM1,E2F1,EXO1,FOS,GTPBP4,IL1B,IRF5,KAT2B,KRT5,LGALS3BP,ODC1,PERP,PIK3R3,PRC1,SLC22A5,SPP1,TIMP1,TK1	135 (19)
IL6		cytokine	Activated	4.385	bias	9.03e-07	ATF3,BST2,CCL4,CCNB2,CCR2,CCR7,CD14,CD86,CDK1,CDKN1A,CLU,CXCL8,CXCR4,CYBB,E2F1,EXO1,FN1,FOS,GINS1,GZMB,HPGD,IFNG,IL1RN,IL7R,ITPR1,LAG3,LGALS1,MIR17HG,PRF1,RORC,S100A9,SPP1,STS,TIMP1,TK1,TRAF3,WARS1	143 (19)
1-hydroxy-2-methyl-2-butenyl 4-diphosphate		chemical - endogenous non-mammalian		1.491	bias	1.14e-06	CCR7,CD69,IFNG,IL2RA,OSM
D-glucose		chemical - endogenous mammalian	Activated	3.03	bias	1.15e-06	ATF3,CD59,CDK1,CDKN1A,CLU,CXCL8,CXCR4,CYBB,E2F1,ELOVL6,ENO1,FN1,FOS,GOT1,IFNG,IL1B,ITPR1,KAT2B,LGALS1,ODC1,PBK,PDGFRB,PGK1,PLAUR,PON2,RGS2,S100A8,SEPHS2,SOS2,SPP1,TIMP1,TK1,TPX2,WARS1	162 (21)
PD98059		chemical - kinase inhibitor	Inhibited	-4.13	bias	1.24e-06	AMD1,APOBEC3G,ARRB1,ATF3,CCL4,CCR2,CD14,CD69,CD86,CDKN1A,CLU,CXCL8,CXCR4,E2F1,ENO1,EPAS1,FN1,FOS,HPGD,IFNG,IL1B,IL1RN,IL2RA,NFYB,ODC1,OSM,PLAUR,S100A8,SPP1,TIMP1	104 (15)
Mapk		group	Activated	2.602	bias	1.3e-06	ADAM12,CDKN1A,CXCL8,CYBB,FOS,GZMB,HPGD,IFNG,IL1B,PRF1,S100A8,SPP1	132 (19)
Interferon alpha		group	Activated	2.952	bias	1.31e-06	APOBEC3G,ATF3,BST2,CCR7,CD69,CD86,CDKN1A,CXCL8,E2F1,FOS,GZMB,IFI27,IFNG,IL12RB2,IL1B,IL1RN,IL2RA,IL7R,IRF5,IRF8,ITPR1,NKG7,PRF1,RIPK1,S100A9,WARS1	91 (17)
NR3C1		ligand-dependent nuclear receptor		0.457		1.52e-06	ABHD2,ARRB1,BAG3,CCL4,CD40LG,CD69,CDKN1A,CXCL8,CXCR4,FCER1G,FN1,FOS,GEM,HSP90AB1,HSPA6,IFT122,IL1B,IL1RAP,IL7R,IRF8,KRT5,MAL,NSMAF,PIK3R3,RASD1,RGS2,RHOB,RIPK1,RIPK2,SLC43A1,SPP1,TIMP1,TK1,TRAF3	130 (17)
cycloheximide		chemical reagent	Inhibited	-2.191		1.78e-06	CCL4,CDKN1A,CXCL8,CXCR4,FN1,FOS,GOT1,IFNG,IL1B,IL1RN,IL7R,OSM,PDGFRB,PERP,PGK1,PLAUR,PSEN2,RGS2,RHOB,S100A8,SPP1,TIMP1,TK1	139 (18)
GATA3		transcription regulator		-1.289		1.83e-06	CCL4,CCR2,CCR8,CDKN1A,CXCR4,ELOVL6,FN1,FOS,IFNG,IL12RB2,IL2RA,IL7R,KMT2E,LTA,NKG7,S100A8,S100A9,SLC27A2	121 (19)
PI3K (complex)		complex	Activated	3.804	bias	1.87e-06	ADAM12,ATF3,CCL4,CD40LG,CD86,CDKN1A,CXCL8,CXCR4,CYBB,E2F1,FN1,FOS,IFNG,IL1B,IL1RN,IL7R,RGS2,RHOB,SLC9A1,SPP1	99 (14)
SR 144528		chemical reagent		-1.452	bias	1.92e-06	CCL4,CCR2,CXCL8,IL1B,IL1RN	108 (20)
(R)-limonene		chemical toxicant				2.05e-06	CD40LG,CD69,IL1B,IL2RA	72 (7)
adenosine		chemical - endogenous mammalian	Activated	2.2		2.25e-06	CD69,CD86,CXCL8,CXCR4,FOS,IFNG,IL1B,IL2RA,TIMP1	98 (18)
tacrolimus		chemical drug	Inhibited	-2.562	bias	2.3e-06	CAPG,CCL4,CXCL8,CXCR4,CYBB,F5,FN1,FOS,GNPDA1,GZMB,IFNG,IL1B,IL2RA,ITPR1,ODC1,PRF1,SPP1,TNFRSF4	85 (13)
poly rI:rC-RNA		biologic drug	Activated	4.355	bias	2.31e-06	ABCE1,APOBEC3G,ATF3,BST2,CCL4,CCNB2,CCR7,CD14,CD40LG,CD69,CD86,CDK1,CXCL8,CXCR4,DISC1,FN1,FOS,IFI27,IFNG,IL1B,IL2RA,IL4I1,IRF5,LTA,NKG7,PIK3R3,PLAUR,PSEN2,PUS1,RGS2,SRGN,SYK,TENM1	100 (16)
hyaluronic acid		chemical - endogenous mammalian		1.662	bias	2.31e-06	CCL4,CCR7,CD86,CXCL8,CXCR1,CXCR4,FN1,FOS,IL1B,IRF5,SPP1,TIMP1	110 (18)
cerivastatin		chemical drug		-1.041		2.39e-06	CD40LG,CDKN1A,CXCL8,FN1,IFNG,MAL,NET1,PLAUR,S100A8,S100A9	119 (20)
Pam3-Cys-Ser-Lys4		chemical reagent		1.628	bias	2.5e-06	CCL4,CCR2,CCR7,CD14,CD40LG,CD69,CD86,CXCL8,CXCR1,IFNG,IL1B,IL2RA,RGS2,TRAF3	104 (16)
GnRH analog		biologic drug		-0.243		2.52e-06	ATF3,ATG4A,BST2,CDK1,CETN2,FAM214B,FN1,FOS,HAUS3,HSP90AB1,IFI27,IFNG,ITPR1,PDGFRB,PIK3R3,POLR3F,PSEN2,RIPK1,SMAD5,SMG5,TXK	76 (8)
calcimycin		chemical reagent	Activated	2.921	bias	2.54e-06	AMD1,ATF3,CD14,CD86,CXCL8,FN1,FOS,IFNG,LTA,MAP3K8,ODC1,PON2	100 (16)
E2F4		transcription regulator		-1.732		2.59e-06	CCDC77,CCNB2,CDK1,CDKN1A,CFAP20,E2F1,ECT2,EPAS1,EXOSC9,GINS1,MCM10,NDC80,PRC1,PRIM2,TK1,TPX2,UMPS	93 (7)
TYROBP		transmembrane receptor		1.823	bias	2.59e-06	CCR7,CD69,CD86,CXCL8,IFNG,IL1B,IRF8,NPC2,SPP1	104 (18)
Pam3-Cys		chemical toxicant	Activated	2.681	bias	2.61e-06	CD14,CD69,CD86,CXCL8,IFNG,IL1B,IL1RN,IL2RA	96 (14)
IL15		cytokine	Activated	3.611	bias	2.63e-06	CCL4,CCR2,CD160,CD40LG,CD59,CD69,CD86,CDKN1A,CXCL8,CXCR4,ENO1,GNLY,GZMB,IFNG,IL12RB2,IL1RAP,IL2RA,IL7R,LTA,PGK1,PIK3R3,PLD1,PRF1,SRGN,TIMP1	97 (14)
PRKCE		kinase	Activated	2.821	bias	2.69e-06	ADAM12,CDKN1A,CXCL8,E2F1,FOS,HSP90AB1,IL1B,IL2RA,ODC1,RGS2	140 (22)
cyclophosphamide		chemical drug		1.493	bias	2.69e-06	ATF3,CLU,FOS,GTPBP4,IFNG,IL1B,ODC1,SLC22A5,SPP1,TIMP1	110 (17)
SPI1		transcription regulator		0.751	bias	2.73e-06	CCL4,CCNB2,CCR7,CD14,CD40LG,CDK1,CDKN1A,CXCR1,CYBB,E2F1,FCER1G,FOS,IFI27,IL1B,IL1RN,IL2RA,IL7R,SPP1,TK1	120 (17)
BTK		kinase		1.092		2.78e-06	CCL4,CCR7,CD69,CD86,CDKN1A,CXCL8,CXCR4,E2F1,IFNG,IL1B,IL2RA,IL4I1	108 (19)
PLX5622		chemical drug	Activated	2.121	bias	3.03e-06	CCL4,CCR2,CCR8,CD40LG,HSP90AB1,IL1B,IL1RN,LTA,OSM,SPP1
HSPA1A/HSPA1B		enzyme		0.505	bias	3.07e-06	CDK1,CDKN1A,CXCL8,FOS,IL1B	125 (18)
IL23		complex	Activated	2.579	bias	3.1e-06	CCR2,CXCL8,IFNG,IL1B,IL2RA,IL4I1,RORC,S100A8	112 (16)
CREBBP		transcription regulator		0.371	bias	3.27e-06	ADAM12,CAPG,CCR7,CD160,CD59,CDKN1A,CXCL8,CXCR4,CYBB,FNDC3B,FOS,IFNG,IL2RA,IL7R,LGALS3BP,LTA,MAP3K8,PDGFRB,PRF1,RGS2,SLC43A1,TBX19,WFS1	119 (20)
CD3		complex	Activated	5.034	bias	3.33e-06	BST2,CCL4,CCR2,CD40LG,CD69,CD86,CDK1,CXCL8,CXCR4,FCER1G,FOS,GTPBP4,GZMB,HCCS,IFNG,IL12RB2,IL1B,IL1RAP,IL2RA,IL4I1,IL7R,IRF8,ITPR1,LTA,MAP3K8,ODC1,PRF1,RORC,SRGN,TNFRSF4,ZBTB32	117 (17)
MITF		transcription regulator		1.834	bias	3.39e-06	CDKN1A,CXCL8,ECT2,FANCG,FN1,FOS,GPRIN1,GZMB,HPGD,INPP4B,NUF2,PIF1,PRF1,PSEN2,RECQL4,RFC5,TBC1D16,TPX2	86 (10)
bryostatin 1		chemical drug	Activated	2.398	bias	3.42e-06	CD86,CXCL8,CXCR4,E2F1,IFNG,IL1B,ODC1	105 (17)
SPP1	6.61	cytokine	Activated	2.394	bias	3.61e-06	CCL4,CCR2,CD40LG,CDKN1A,CXCL8,E2F1,EPDR1,FN1,FOS,FOXRED1,GSTZ1,IFNG,IL1B,SPP1,TIMP1	108 (18)
IL1B	5.425	cytokine	Activated	4.935	bias	3.62e-06	ATF3,CCL4,CCR2,CCR7,CCR8,CD14,CD40LG,CD69,CD86,CDKN1A,CTSF,CXCL8,CXCR1,CXCR4,CYBB,E2F1,EPAS1,FN1,FOS,GEM,IFNG,IL1B,IL1RAP,IL1RN,IL2RA,IL4I1,LTA,MAP3K8,NFYB,ODC1,OSM,PLD1,RHOB,RIPK2,RORC,S100A8,S100A9,SPP1,SRGN,TIMP1,TK1	112 (16)
fingolimod		chemical drug		-1.689	bias	3.82e-06	CCL4,CCR2,CCR7,CD69,CD86,CDKN1A,E2F1,FN1,IFNG,IL1B	123 (17)
BCL11B		transcription regulator		0.046	bias	3.91e-06	CDKN1A,CXCL8,IFNG,IL2RA,IL7R,LTA,MAP3K8,NCEH1,RORC	66 (7)
IRF8	5.1	transcription regulator	Activated	2.025	bias	3.94e-06	ATF3,CCR2,CCR7,CD14,CD86,CDKN1A,CYBB,FOS,IFNG,IL1B,IRF5,IRF8,TK1	105 (17)
IL33		cytokine	Activated	4.094	bias	4.56e-06	ARRB1,ATP8B4,CCL4,CCR2,CD69,CD86,CXCL8,EPAS1,IFNG,IL1B,IL1RN,IL2RA,IRF5,PSEN2,RIPK2,S100A8,S100A9,TIMP1,TRAF3	113 (15)
CpG ODN 1826		chemical reagent		1.944	bias	4.77e-06	CCL4,CCR7,CD14,CD69,CD86,CXCL8,CYBB,IFNG,IL1B,RGS2	106 (17)
TNFSF10		cytokine		1.191		4.81e-06	CD14,CD69,CXCL8,CXCR4,FOS,IFI27,IFNG,IL1B,IL1RN,IL2RA,TIMP1	94 (15)
RABL6		other	Activated	2.333	bias	5.07e-06	DRAM1,KIF23,MCM10,NDC80,PARP2,PBK,PRC1,TMEM97,TPX2	97 (7)
CRNDE		other		1.504	bias	5.13e-06	CDKN1A,HSPA6,MAP3K8,PDGFRB,RRAS,STK3,TAOK3
GAPDH		enzyme		-1.673	bias	5.13e-06	CCL4,ENO1,FCER1G,GEM,IFNG,SPP1,WARS1	70 (7)
MIF		cytokine	Activated	2.326	bias	5.15e-06	CCL4,CCR8,CXCL8,CXCR1,CXCR4,FOS,GZMB,IFNG,IL1B,IL2RA,IL7R,TIMP1	117 (18)
JUN		transcription regulator	Activated	3.627	bias	5.18e-06	ATF3,BCL9,CD14,CDK1,CDKN1A,CLU,CXCL8,CXCR1,EPAS1,FN1,FOS,GOT1,HPGD,IFNG,IL1B,IL2RA,IL7R,ITGAD,OSM,PLAUR,RHOB,SPP1,SYK,TARBP2,TIMP1,TK1	138 (21)
IL37		cytokine	Inhibited	-2.371	bias	5.22e-06	CCL4,CXCL8,IFNG,IL1B,IL1RN,TIMP1	95 (15)
INSIG1		other	Inhibited	-2.137	bias	5.3e-06	AACS,CCR7,CXCR4,DHCR24,ELOVL6,IFNG,IRF8,PLD1,PRF1,S100A8,S100A9
ionomycin		chemical reagent	Activated	3.282	bias	5.34e-06	CD40LG,CD69,CXCL8,FOS,GEM,GZMB,IFNG,IL2RA,IL4I1,JARID2,LTA,PRF1,RGS2,RORC,SPP1	110 (17)
interferon beta-1a		biologic drug				5.6e-06	CCR2,CXCR4,ENO1,FCER1G,GNLY,GZMB,IL1RN,LGALS1,MAL,PGK1,PLAUR,S100A9
ATP-gamma-S		chemical reagent				5.76e-06	CCL4,CCR7,CD69,CD86,CXCL8,CXCR4,IL2RA,IL7R,WARS1	118 (18)
cobalt chloride		chemical reagent	Activated	2.622	bias	5.93e-06	CCR7,CDKN1A,CLU,CXCL8,CXCR4,E2F1,EPAS1,HSP90AB1,PGK1,PLAUR	101 (15)
mycophenolic acid		chemical drug	Activated	2.53	bias	5.93e-06	ATF3,CD59,CDKN1A,CLU,CXCL8,CXCR4,CYBB,FN1,IL1B,STYK1	110 (18)
NOTCH1		transcription regulator		0.698		6.06e-06	CD14,CDKN1A,CXCL8,CXCR4,E2F1,ECT2,EPAS1,FCER1G,FOS,HSP90AB1,IFNG,IL2RA,IL7R,IRF8,PDGFRB,RORC,SPP1,TUG1	146 (20)
lipoxin A4		chemical - endogenous mammalian		-1.718	bias	6.22e-06	CDKN1A,CXCL8,FN1,IFNG,IL1B,IRF5,TIMP1	114 (16)
LDL		complex	Activated	2.407	bias	6.38e-06	ATF3,CCL4,CCR2,CCR7,CD40LG,CDK1,CDKN1A,CXCL8,CYBB,FOS,HSPA6,IFNG,IL1B,IL1RN,ITPR1,LTA,NPC2,S100A8	111 (16)
TLR2		transmembrane receptor	Activated	2.637	bias	6.45e-06	APOBEC3G,ATF3,CCL4,CCR2,CD40LG,CD69,CD86,CDKN1A,CXCL8,CYBB,FN1,IFNG,IL1B,IL1RN,IL2RA	102 (15)
RELA		transcription regulator	Activated	3.259	bias	6.57e-06	BACH2,CCR7,CD14,CD59,CD69,CDKN1A,CERT1,CXCL8,CXCR4,CYBB,E2F1,EPAS1,FN1,FOS,IFNG,IL1B,IL1RN,IL2RA,IL7R,INPP4B,LTA,MIR17HG,PLD1,RORC,TNFRSF4	117 (15)
nystatin		chemical drug				6.94e-06	CD86,CXCL8,IL1B,SPP1,TIMP1	93 (16)
isopentenyl diphosphate		chemical - endogenous mammalian		1.412		6.94e-06	CCL4,CCR2,CCR8,IFNG,IL2RA	122 (19)
ESR1		ligand-dependent nuclear receptor		0.761		7.2e-06	AATF,ABHD2,ARL4D,ARRB1,ATF3,CCL4,CD59,CD69,CDK1,CDKN1A,CENPN,CXCL8,DHCR24,DIAPH3,DISC1,E2F1,ENO1,FOS,GEM,HOOK2,IFI27,IFNG,IL1B,IL2RA,IRF5,KIF23,LGALS1,LGALS3BP,MAP3K8,NCAPH,NDC1,NFYB,NRIP1,NUP214,PBK,PCM1,PLAUR,POLR3A,PSEN2,RAB11FIP4,RIPK1,RORC,S100A9,SERPINB6,SMAD5,SOS2,SPP1,STK3,TMEM97,TMPRSS3,TRIB1,WARS1	158 (23)
TBX21		transcription regulator		1.658		7.38e-06	CCL4,GZMB,IFNG,IL12RB2,IL7R,NKG7,PRF1,RORC,SPP1	126 (18)
GFI1		transcription regulator		-1.742	bias	7.79e-06	CCR7,CDKN1A,CXCL8,CXCR4,HSP90AB1,IFNG,IL1B,IL7R,KAT2B,LTA,RIPK1,RIPK2,TRAF3	115 (18)
MYD88		other	Activated	3.158	bias	8.21e-06	CCL4,CCNL2,CD14,CD86,CXCL8,FANCB,FCER1G,FOS,HSP90AB1,IFNG,IL1B,IL1RN,IRF8,PARP2,S100A8,SLCO3A1,SPP1,TIMP1	124 (18)
ETS1		transcription regulator		0.534	bias	8.3e-06	CCR8,CD14,CD69,CDKN1A,FN1,HPGD,HSPA6,IFNG,IL2RA,IL7R,PERP,PRF1,PRIM2,SERPINB6,SPP1,SRGN	137 (23)
CTLA4		transmembrane receptor	Inhibited	-2.245	bias	8.32e-06	CD69,CD86,CXCL8,GZMB,IFNG,IL12RB2,IL2RA,LAG3,TPX2	87 (17)
Ap1		complex	Activated	2.911	bias	8.86e-06	ATF3,CCL4,CD40LG,CLU,CXCL8,FN1,FOS,GZMB,HPGD,IFNG,IL1B,IL2RA,PLAUR,TIMP1	125 (18)
CYLD		transcription regulator		-1.257		8.99e-06	CD86,CXCL8,FCER1G,IFNG,IL1B,IL2RA,IL7R	82 (16)
CGS 21680		chemical reagent	Inhibited	-2.589	bias	8.99e-06	CCL4,CD40LG,CD69,FOS,IFNG,RGS2,SLC9A1	79 (15)
SB203580		chemical - kinase inhibitor	Inhibited	-4.798	bias	9.09e-06	APOBEC3G,ATF3,BST2,CCL4,CD69,CD86,CDK1,CDKN1A,CXCL8,ENO1,FN1,FOS,GZMB,IFI27,IFNG,IL1B,IL1RN,IL2RA,PDGFRB,PHLDB2,PLAUR,RIPK2,SLC35D1,SPP1,TIMP1	103 (17)
ULBP1		transmembrane receptor		1.982	bias	9.27e-06	CCL4,CD69,IFNG,IL2RA	78 (11)
ITGB3		transmembrane receptor		0.411	bias	9.37e-06	CD40LG,CDK1,FN1,FOS,IFNG,IL1B,OSM,PLAUR,TIMP1	139 (19)
Ige		complex	Activated	3.517	bias	9.83e-06	ARRB1,CCL4,CD86,CDKN1A,CXCL8,FCER1G,IFNG,IL1B,IL2RA,IL7R,LTA,MAP3K8,OSM,PIP5K1A,RILP,RIPK2,SERPINB6,SLCO4A1,SPP1,TRAF3	126 (18)
hemin		chemical - endogenous mammalian		-1.005		9.95e-06	CDKN1A,CXCL8,CYBB,FN1,HDAC9,HSP90AB1,IFNG,IL1B,NFYB,SPP1	126 (21)
cytokine		group	Activated	2.909	bias	1.04e-05	ADAM12,CCR7,CD40LG,CD69,CD86,CLU,CXCL8,FOS,IFNG,IL2RA,PLAUR,RIPK2,TIMP1	111 (15)
RARA		ligand-dependent nuclear receptor		-0.659		1.04e-05	ABHD2,CD14,CDK1,CDKN1A,CENPN,CTNND1,CXCL8,DISC1,E2F1,FOS,IFNG,IL12RB2,KIF23,KRT5,LGALS1,LGALS3BP,NCAPH,PBK,RASD1,RORC,SPP1	158 (26)
leukotriene D4		chemical - endogenous mammalian	Activated	2.759	bias	1.05e-05	ADAM12,ATF3,CCL4,CXCL8,GEM,MAP3K8,PDGFRB,RGS2	95 (15)
alefacept		biologic drug		-1.912	bias	1.05e-05	CD69,CXCL8,GNLY,GZMB,IFNG,IL2RA,IL7R,PRF1
ICAM1		transmembrane receptor	Activated	2.791	bias	1.05e-05	CCL4,CD69,CD86,FOS,IFNG,IL12RB2,IL1B,IL2RA	114 (18)
2-deoxyglucose		chemical drug		-0.732		1.05e-05	CDKN1A,CXCL8,FOS,GOT1,IFNG,IL1B,IRF8,ODC1,SPP1	109 (17)
CSF3		cytokine		0		1.08e-05	CAPG,CCR7,CD14,CXCL8,CXCR4,CYBB,FOS,GNLY,GZMB,IFNG,IL1RN,LTA,ODC1,RORC	103 (14)
E2F3		transcription regulator		1.944	bias	1.08e-05	CCNB2,CDK1,CDKN1A,CTNND1,E2F1,FBXO5,HMGB2,MALAT1,MCM10,MIR17HG,RNF146,S100A8,TK1,TPX2	102 (7)
ERK1/2		group	Activated	3.003	bias	1.08e-05	ARRB1,CCL4,CCR7,CD86,CDK1,CDKN1A,CXCL8,CXCR4,CYBB,ENO1,FN1,FOS,HPGD,IFNG,IL1B,IL2RA,PLAUR,SPP1,TIMP1	116 (17)
miR-34a-5p (and other miRNAs w/seed GGCAGUG)		mature microRNA	Inhibited	-2.92	bias	1.15e-05	ATF3,CD69,CDK1,CDKN1A,E2F1,KAT2B,LGALS3BP,MCM10,MVB12A,SLC27A2,SLCO3A1,TRAM2
etoposide		chemical drug		1.751	bias	1.25e-05	ATF3,CD86,CDK1,CDKN1A,CREG1,CXCL8,E2F1,FANCG,GZMB,IFNG,IL1B,ODC1,PIK3R3,PRF1,TK1	124 (17)
deferoxamine		chemical drug	Activated	3.376	bias	1.33e-05	CCL4,CCR7,CD14,CD300A,CD59,CDKN1A,CXCL8,ENO1,EPAS1,FOS,GEM,MS4A6A,PGK1,PLAUR,SPP1	121 (17)
HDAC1		transcription regulator		-0.817		1.4e-05	ATF3,CCNB2,CCR8,CDK1,CDKN1A,CXCL8,FN1,FOS,IL1B,ITGAD,MCM10,PRIM2,RECQL4,RHOB,RORC,S100A9,SLC35D1,SPP1	142 (18)
NFATC2		transcription regulator		0.954	bias	1.49e-05	CCR7,CD40LG,CD86,CDKN1A,IFNG,IL12RB2,IL1B,IL2RA,ITPR1,JARID2,PLD1,RGS2,RORC,SLCO3A1,ZBTB32	110 (18)
ATP		chemical - endogenous mammalian		0.867	bias	1.53e-05	CCL4,CCR7,CD14,CD86,CXCL8,CXCR4,FOS,IL1B,IL1RN,IL2RA,PLD2	103 (18)
okadaic acid		chemical toxicant	Activated	2.627		1.61e-05	CDK1,CXCL8,CYBB,FOS,IL1B,IL1RN,MAP3K8,ODC1,SPP1,TK1	133 (18)
DUSP1		phosphatase	Inhibited	-2.327		1.67e-05	AACS,CCL4,CD86,CXCL8,CYBB,IL12RB2,IL1B,IL1RN,OSM,PLAUR,S100A9	119 (19)
IL5		cytokine	Activated	2.713	bias	1.69e-05	CCR2,CCR7,CD40LG,CD69,CDKN1A,CXCL8,CXCR4,ENO1,HSPA6,IFNG,IL2RA,ITGAD,LTA,SKA1,TMEM97,TNFRSF4,ZBTB32,ZNF443	105 (17)
STAT5A		transcription regulator	Activated	2.055		1.69e-05	C15orf48,CDKN1A,EPAS1,FCER1G,FOS,IFNG,IL12RB2,IL2RA,IL7R,KRT5,LTA,OSM,PRF1,QPCT,TGFBI,TNFRSF4,TRAF3,WARS1	108 (18)
hemozoin		chemical - endogenous non-mammalian	Activated	2.408	bias	1.7e-05	CCL4,CCR2,CXCR4,IL1B,S100A8,S100A9	101 (15)
FAS		transmembrane receptor		1.294		1.76e-05	AKAP9,CCL4,CD59,CD86,CDKN1A,CTNND1,CXCL8,F5,FOS,IFNG,IL1B,IL1RAP,ITPR1,OSM,PLD1,PLD2,SPP1,STK3,SYK,TRAF3,TRIB1	99 (16)
LY294002		chemical - kinase inhibitor	Inhibited	-4.283	bias	1.95e-05	ATF3,CCR2,CD14,CD40LG,CD69,CD86,CDKN1A,CXCL8,DHCR24,EPAS1,FN1,FOS,GEM,HMGB2,HSP90AB1,IFNG,IL1B,IL1RN,INPP4B,MAP3K8,NDC80,PGK1,RGS2,RORC,SPP1,SYK	94 (16)
TP53		transcription regulator		-0.749		1.95e-05	AATF,ADAM12,AKAP9,ALDH1B1,ARRB1,ATF3,ATG4A,CCL4,CCNB2,CD59,CDK1,CDKN1A,CLU,CPOX,CTSF,CXCL8,CXCR1,DHCR24,DRAM1,E2F1,EPAS1,EXO1,F5,FH,FN1,FOS,HDAC9,HJURP,HMGB2,HSP90AB1,IFNG,IL1B,IL1RN,IL2RA,IL4I1,IRF5,IRF8,KAT2B,KIF23,MAP3K8,MIR17HG,NCAPH,NDC80,NPHP4,PARP2,PBK,PDGFRB,PERP,PIK3R3,PLAUR,PRC1,PSEN2,RECQL4,RHOB,SERPINB6,SGTB,SPP1,TARBP2,TGFBI,TIMP1,TMEM97,TPX2,TRIAP1,UMPS	150 (21)
IRF4		transcription regulator		-0.455		2e-05	CDK1,CXCR4,IFNG,IL1B,IL1RN,IL2RA,IL7R,INPP4B,IRF5,PLAUR,RHOB,RORC,SPP1,TK1	121 (15)
KLF5		transcription regulator	Activated	2.3	bias	2.02e-05	CCNB2,CDK1,CDKN1A,CXCR4,EPAS1,KRT5,S100A9,WFS1	77 (9)
ERBB2		kinase	Activated	2.584	bias	2.06e-05	ADAM12,ATF3,BPNT2,CCL4,CCNB2,CD59,CDK1,CDKN1A,CLU,CMAS,CXCL8,E2F1,FN1,FOS,GINS1,GSTZ1,HMGB2,IFNG,IL1B,LGALS1,MCM10,NDC80,NET1,NPC2,P4HA2,PGK1,PLAUR,POLR1B,POLR3A,PRC1,PRIM2,RFC5,RHOB,SLC22A5,SLCO4A1,TGFBI,TK1,WFS1	139 (18)
N-acetyl-L-cysteine		chemical drug	Inhibited	-3.062	bias	2.07e-05	CCR2,CD86,CDKN1A,CXCL8,CXCR4,CYBB,E2F1,FOS,GZMB,IFNG,IL1B,IL2RA,PLAUR,PSEN2,RHOB,SPP1	114 (20)
ID2		transcription regulator		-0.451		2.08e-05	CCR7,CCR8,CD40LG,CDK1,CDKN1A,CXCR4,FCER1G,IFNG,IL7R,IRF5,IRF8,LGALS1,LTA,TNFRSF4,TRAF3	89 (13)
IFNB1		cytokine		0.205	bias	2.12e-05	BST2,CCL4,CD14,CD86,CDKN1A,CXCL8,E2F1,FOS,HMGB2,IFI27,IFNG,IL1B,MCM10,PHLDB2,RIPK2,SPP1,TIMP1,TNFRSF4	108 (21)
NOS2		enzyme	Activated	2.377		2.25e-05	CCL4,CD14,CD86,CDKN1A,CXCL8,HMGB2,IFNG,IL1B,IL1RN,LGALS3BP,PERP,PRF1,S100A8,TIMP1	125 (20)
IRAK4		kinase	Activated	2.143	bias	2.26e-05	ATF3,CD86,CXCL8,FOS,GEM,IFNG,IL1B,IRF5,MAP3K8	107 (20)
PTPN11		phosphatase		-1.004		2.26e-05	CD14,CDKN1A,CXCL8,CYBB,FOS,IFNG,PDGFRB,PERP,PLAUR	91 (19)
SP1		transcription regulator	Activated	3.534	bias	2.33e-05	ABHD2,ATF3,CD59,CDK1,CDKN1A,CXCL8,CXCR4,DHCR24,DIAPH3,E2F1,FN1,FOS,IFNG,IL12RB2,IL1B,ITGAD,ITPR1,PDGFRB,PGK1,PLAUR,RECQL4,RRAS,SPP1,TIMP1,TNFRSF4,TRIB1,TUG1	148 (22)
NUPR1		transcription regulator		-1		2.36e-05	ATF3,BCL9,CCDC77,CCNB2,CTPS2,CXCL8,CXCR4,DHCR24,EXO1,FAM111B,GINS1,GNE,HJURP,KDM3A,KIF23,MCM10,MGME1,MTFR2,P4HA2,PRDM4,RAB11FIP5,RTN4IP1,SHCBP1,THG1L,TRIB1
estriol		chemical - endogenous mammalian		-1.912	bias	2.4e-05	CCL4,CCR7,CXCR1,IFNG,IL1B,IL1RN,LTA	74 (9)
CDKN1A	5	kinase		-1.95	bias	2.4e-05	CDK1,CDKN1A,E2F1,EXO1,FANCG,FN1,HJURP,HMGB2,IFNG,IL1B,KRT5,LGALS3BP,PARP2,PBK,PRC1,STK3,TPX2	149 (21)
SMARCA4		transcription regulator		1.738	bias	2.47e-05	ABHD2,APOBEC3G,ASCC1,CCR2,CCR8,CDKN1A,CXCL8,CXCR4,E2F1,ELOVL6,FN1,FOS,HPGD,IFI27,IFNG,IL1B,IL7R,ITPR1,LGALS1,MCTP2,NPC2,PERP,PLAUR,RGS2,SPP1,SYK,TAOK3,TMCC3,TMEM117	139 (20)
VDR		transcription regulator	Activated	3.135		2.54e-05	CD14,CDKN1A,CXCL8,IFNG,IL1RN,LGALS1,NDC1,ODC1,PLD1,PRC1,S100A8,S100A9,SERPINB6,SPP1,TK1,TPX2	121 (20)
TLR9		transmembrane receptor	Activated	2.98	bias	2.54e-05	ATF3,CCL4,CCR7,CD300A,CD69,CD86,CXCL8,IFNG,IL1B,IL2RA,IL4I1,LTA,NSMAF,S100A8,STYK1,TIMP1	87 (18)
PTX3		other		-1.744	bias	2.54e-05	CCL4,CCR2,CXCL8,FOS,IL1B,TRAF3	88 (15)
IFNA2		cytokine	Activated	3.018	bias	2.67e-05	BAG3,BST2,CD69,CD86,CDKN1A,GEM,GOT1,HSPA6,IFI27,IFNG,IL12RB2,IL1B,IL2RA,IRF5,LGALS3BP,MAL	124 (25)
MTOR		kinase		1.615		2.67e-05	AATF,CCR7,CD86,CDKN1A,CTNND1,CXCL8,CXCR4,ENO1,EPAS1,FN1,GSTZ1,GZMB,HSP90AB1,IFNG,IL1B,IRF8,PLD2,PRF1,RORC,TK1	97 (18)
CYBA		enzyme	Activated	2	bias	2.7e-05	CDKN1A,CYBB,EPAS1,FN1	80 (12)
TPCA-1		chemical - kinase inhibitor		-0.594	bias	2.7e-05	BACH2,CXCL8,IFNG,IL1B	84 (12)
HIF1A		transcription regulator	Activated	2.934	bias	2.78e-05	BACH2,CCR2,CCR7,CDKN1A,CXCL8,CXCR1,CXCR4,ENO1,EPAS1,FN1,FOS,IFNG,IL1B,ITPR1,KDM3A,LGALS1,P4HA2,PGK1,PLAUR,RAB11FIP4,RORC,TIMP1,ZDHHC9	144 (17)
ITGAX		transmembrane receptor				2.88e-05	CCL4,CXCL8,IL1B	97 (16)
D-Pen-2,5-enkephalin		chemical reagent				2.88e-05	GZMB,IFNG,PRF1	65 (8)
BCL3		transcription regulator		-1.179		2.91e-05	CD69,CD86,CXCL8,FOS,IFNG,IL1B,PLAUR,S100A8	102 (16)
prednisolone		chemical drug		-1.457	bias	2.94e-05	ATG4A,BAG3,CD40LG,CD86,CXCR4,DRAM1,FANCC,IFNG,IL1B,LHX4,NQO2,PGK1,RECQL4,RNF111,SPP1,SRGN	119 (17)
RNA polymerase II		complex				3.03e-05	AGPAT2,CCNB2,CD14,CDKN1A,CXCL8,CXCR4,ENO1,FOS,GOT1,IL1B,IL1RN,IL2RA,MAL,RORC,SLC27A2,SLC36A4,SPP1	118 (13)
CD40		transmembrane receptor	Activated	3.414	bias	3.2e-05	APOBEC3G,CCL4,CD40LG,CD69,CD86,CDKN1A,CXCL8,FOS,IFNG,IGHG2,IL1B,IL1RN,IL2RA,IL4I1,LTA	96 (15)
chloroquine		chemical drug		-0.503		3.27e-05	CD69,CD86,CXCL8,DRAM1,FN1,IFNG,IL1B,RORC	98 (19)
IL7		cytokine	Activated	2.621	bias	3.38e-05	CCL4,CD69,CD86,CDKN1A,CXCR4,E2F1,FN1,IFNG,IL2RA,IL7R,LTA,RORC	132 (18)
IL1A		cytokine	Activated	3.054	bias	3.41e-05	ATF3,CCL4,CCR2,CD86,CDKN1A,CXCL8,FOS,IFNG,IL1B,IL1RN,IL2RA,S100A8,S100A9,SPP1,TIMP1,TK1	139 (20)
TREM1		transmembrane receptor	Activated	2.178	bias	3.55e-05	ATF3,CCR7,CD14,CD86,CDK1,CXCL8,CXCR4,GEM,IFNG,IL1B,MAP3K8,PLD1,SLCO4A1,SPP1	108 (17)
mir-155		microRNA		-1.464	bias	3.62e-05	CD40LG,CD69,CDKN1A,CXCL8,IFNG,IL1B,IRF8,JARID2,RIPK1,SMAD5,TAB2	129 (20)
N-formyl-Met-Leu-Phe		chemical reagent		1.952	bias	3.7e-05	CAPG,CCL4,CXCL8,CYBB,IL1B,KIF23,OSM	117 (19)
ITGAV		transmembrane receptor		1.732	bias	3.7e-05	CDK1,CDKN1A,FN1,FOS,OSM,TIMP1	131 (21)
NRAS		enzyme		-0.672	bias	3.76e-05	CCL4,CCNB2,CD86,CDKN1A,CYBB,EIF2D,EPAS1,EXO1,FN1,IL1B,IL1RN,LGALS1,PERP,RHOB	108 (18)
STAT1		transcription regulator	Activated	3.273	bias	3.8e-05	APOBEC3G,BST2,CCL4,CCR7,CD14,CD86,CDKN1A,CXCL8,FCER1G,FOS,IFI27,IFNG,IL12RB2,IL1B,IRF5,IRF8,PDGFRB,PRF1,RORC,WARS1	99 (17)
AGN194204		chemical drug	Activated	2.535	bias	3.93e-05	ATF3,CCL4,CDK1,CDKN1A,IL2RA,IL7R,LGALS1,LTA,NPC2,NRIP1,NSMAF,PRC1,SLCO4A1,SPP1,TIMP1
thioacetamide		chemical toxicant	Activated	2.154	bias	3.93e-05	AACS,CD14,CLU,CPQ,CTSF,FANCB,FOS,GOT1,GTPBP4,IL1B,LGALS1,LGALS3BP,ODC1,SLC22A5,SPP1,TIMP1	104 (15)
manumycin A		chemical reagent		-1.982	bias	4.17e-05	CXCL8,FN1,IL1B,PLD1	102 (20)
A-Fos		chemical reagent		-1.109	bias	4.27e-05	CCL4,IFNG,IRF8,ODC1,TNFRSF4
OSCAR		other		0.816	bias	4.42e-05	CCR2,CD86,CXCL8,IL1RN,MAP3K8,RRAS	95 (14)
SELP		transmembrane receptor		1.769	bias	4.42e-05	CCL4,CDKN1A,CXCL8,CXCR4,IL1B,PLAUR	139 (18)
TGM2		enzyme		0.18	bias	4.57e-05	CD86,CXCL8,CYP2R1,FCER1G,FN1,IFNG,IL1B,MIR17HG,NPC2,PDGFRB,RTKN2,S100A8,SLC27A2,SPP1,TAF4B	104 (19)
cytarabine		chemical drug	Activated	2.596	bias	4.58e-05	CD69,CD86,CDK1,CDKN1A,GZMB,IL1B,PRF1,TRIAP1	130 (20)
TCF3		transcription regulator		-0.419		4.76e-05	AATF,ATF3,BACH2,C15orf39,CCNB2,CCR2,CDK1,CDKN1A,ECT2,GNE,HMGB2,IL1B,IL2RA,IL7R,MAL,NDC80,NUF2,PGK1,PRC1,RORC	101 (14)
BMP7		growth factor		-0.366	bias	4.81e-05	CCR2,CDKN1A,CXCL8,FN1,IL1B,IL1RN,PDGFRB,RGS2,RNF111,SMAD5,SPP1,STS,TIMP1	101 (17)
PTGER4		G-protein coupled receptor		0.166		4.99e-05	CCL4,CCR7,CD69,CXCL8,CXCR4,CYBB,CYRIA,FBXL20,IL1B,IL4I1,OSM,SPP1	119 (20)
IL1RN	7.425	cytokine	Inhibited	-3.206	bias	5.18e-05	ATF3,CXCL8,HDAC9,IFI27,IFNG,IL1B,RIPK1,RIPK2,S100A9,SPP1,TIMP1	126 (19)
IKK (complex)		complex		-0.346		5.25e-05	CXCL8,FANCC,FANCE,FANCG,IFNG,IL1B	91 (15)
P38 MAPK		group	Activated	3.176	bias	5.32e-05	ATF3,CCR7,CD69,CD86,CDKN1A,CXCL8,CXCR4,CYBB,FN1,FOS,IFNG,IL1B,IL1RN,IL2RA,MAL,PLAUR,RHOB,SPP1,TIMP1,TRIB1	92 (14)
TNFSF9		cytokine		1.516	bias	5.44e-05	CCR7,CD14,CXCL8,IFNG,IL2RA	123 (18)
valsartan		chemical drug		-1.939	bias	5.54e-05	CYBB,FN1,FOS,IFNG,IL1B,SPP1,TIMP1	120 (19)
LDLR		transporter				6.14e-05	CCL4,CCNB2,CCR2,CD40LG,CDK1,CDKN1A,ELOVL6,IFNG,IL1B,IL1RN,KIF23,LAG3,PRC1,SPP1,TRIB1	107 (18)
E2F8		transcription regulator				6.16e-05	CDK1,E2F1,ECT2,KIF23
ETV4		transcription regulator	Activated	2.162	bias	6.2e-05	CXCL8,CXCR4,FN1,HPGD,KRT5,SPP1	109 (7)
NLRP12		other		-1.744	bias	6.2e-05	CXCL8,CXCR4,IFNG,IL1B,IL1RN,TRAF3	89 (14)
forskolin		chemical toxicant	Activated	2.011	bias	6.34e-05	ATF3,BAG3,CCNB2,CCR8,CD14,CD86,CDKN1A,CLU,CTNND1,CXCR4,FN1,FOS,GEM,GNLY,HPGD,IFNG,IL1B,IL2RA,ITPR1,NPC2,ODC1,P4HA2,PGK1,RGS2,RHOB,S100A8,SPP1,TIMP1,TK1,TRIB1,ZNF331	120 (18)
CD44		other		1.755	bias	6.74e-05	CCL4,CCR2,CCR7,CD69,CDKN1A,CLU,FN1,HSP90AB1,IFNG,IL1B,IL1RN,IL2RA,LGALS1,SPP1	108 (16)
BCR (complex)		complex	Activated	2.213	bias	6.82e-05	CCL4,CCR7,CD300A,CD69,CD86,CXCR4,FOS,GZMB,IFNG,IL2RA,MS4A6A	94 (17)
MET		kinase		1.088	bias	6.82e-05	CDK1,CDKN1A,CXCL8,FN1,FOS,IL1B,LTA,MAL,PERP,SLCO3A1,SPP1	108 (18)
lipoarabinomannan		chemical - endogenous non-mammalian	Activated	2.2	bias	6.84e-05	CCL4,CD14,CXCL8,CXCR4,IL1B	90 (13)
IL1		group	Activated	2.525	bias	6.96e-05	CCL4,CCR7,CD40LG,CD59,CDKN1A,CXCL8,FN1,FOS,IFNG,IL1B,IL1RN,IL2RA,ODC1,PDGFRB,PLD1,RORC,S100A9,TIMP1,TNFRSF4	117 (20)
FLT3LG		cytokine		1.348	bias	6.98e-05	CCR7,CD86,CXCR4,CYBB,IFNG,IL1B,IL2RA,IL7R	126 (19)
phorbol esters		chemical - other	Activated	2.743	bias	7e-05	CXCL8,FOS,IFNG,IL1B,IL2RA,ITGAD,ODC1,OSM,TIMP1	122 (19)
1-palmitoyl-2-oleoylglycero-3-phosphoglycerol		chemical reagent				7.09e-05	CXCL8,IFNG,IL1B	87 (16)
KIDINS220		transcription regulator				7.09e-05	CD69,FOS,IFNG	74 (9)
U 50488H		chemical reagent				7.09e-05	CCR2,FOS,IL7R	68 (7)
nitric oxide		chemical - endogenous mammalian	Activated	2.598	bias	7.23e-05	ATF3,CDKN1A,CXCL8,FOS,HSP90AB1,IFNG,IL12RB2,IL1B,IL7R,ODC1,SPP1,TK1	114 (19)
TGFB1		growth factor	Activated	3.2	bias	7.25e-05	ABCD1,ABCE1,ADAM12,AMD1,ARHGAP19,CCL4,CCNB2,CCR2,CCR7,CD14,CD300A,CD59,CD69,CD86,CDK1,CDKN1A,CLU,CPQ,CTNND1,CXCL8,CXCR1,CXCR4,CYBB,E2F1,ENO1,F5,FCER1G,FN1,FNDC3B,FOS,GEM,GZMB,HDAC9,HPGD,IFI27,IFNG,IL1B,IL1RN,IL2RA,ITPR1,KMT2E,LTA,MALAT1,NDC80,NET1,OSM,PDGFRB,PGK1,PLAUR,PRC1,RFC5,RHOB,RNF111,RORC,SPP1,TAB2,TGFBI,TIMP1,UBE4B,WFS1	151 (20)
IL27RA		transmembrane receptor		-0.619	bias	7.28e-05	CD69,CD86,IFNG,IL1B,IL2RA,LTA	97 (17)
CORT		other		-1.709	bias	7.28e-05	CCL4,CCR2,CCR7,CCR8,IFNG,IL1B
LGALS1	1.55	other	Activated	2.18	bias	7.72e-05	CD69,CDKN1A,FN1,GPAT3,IFNG,IL1B,IL2RA,LGALS1	92 (14)
RC3H1		enzyme		-1	bias	7.72e-05	BST2,CCL4,CCR7,ENO1,IFI27,IFNG,IL1B,SPP1	110 (16)
GnRH-A		chemical reagent		0.98		7.72e-05	ATF3,CDKN1A,EIF2AK1,FANCC,FOS,RASD1,RGS2,TARBP2	92 (14)
DETA-NONOate		chemical reagent	Activated	2.043		8.05e-05	CDKN1A,CXCL8,FOS,IFNG,ODC1,S100A8,TIMP1	99 (21)
cyclic AMP		chemical - endogenous mammalian	Activated	2.49	bias	8.15e-05	CD86,CDKN1A,E2F1,FN1,FOS,GOT1,IFNG,IL1B,IL1RN,IL2RA,KIF23,LGALS3BP,ODC1,RORC,TIMP1,TK1	89 (14)
simvastatin		chemical drug	Inhibited	-2.085		8.26e-05	CD14,CD40LG,CDKN1A,CXCL8,CYBB,E2F1,FOS,IFNG,IL1B,NRIP1,RHOB,RORC,SPP1,TIMP1	111 (16)
hydrogen peroxide		chemical - endogenous mammalian	Activated	3.087	bias	8.28e-05	ATF3,CCL4,CCR2,CD59,CD86,CDK1,CDKN1A,CLU,CXCL8,CXCR4,EPAS1,EXOSC9,FN1,FOS,GZMB,IFNG,IL1B,IL2RA,NDC80,ODC1,PLAUR,RIPK1,SPP1,SRGN	127 (19)
SAA1		transporter	Activated	2.386	bias	8.5e-05	CCL4,CXCL8,IL1B,IL1RN,S100A8,S100A9	104 (16)
Ca2+		chemical - endogenous mammalian	Activated	3.135	bias	8.52e-05	ATF3,CCR2,CD86,CDKN1A,CXCL8,CXCR4,E2F1,FN1,FOS,IFNG,IL1B,ITPR1,ODC1,S100A8,S100A9,SPP1	119 (19)
PLA2G2D		enzyme		-1.964	bias	8.77e-05	CCR2,IFNG,IL1B,S100A9	108 (13)
IgG2a		complex		0.083	bias	8.77e-05	CXCL8,IFNG,IL1B,LTA	104 (18)
HIF3A		transcription regulator	Inhibited	-2	bias	8.77e-05	EPAS1,PDGFRB,PGK1,PLAUR	81 (11)
ethylenediaminetetraacetic acid		chemical drug		-0.762		8.77e-05	CXCL8,CXCR1,IFNG,IL1B	81 (16)
bempedoic acid		chemical drug	Inhibited	-2	bias	8.77e-05	CCL4,CD40LG,CXCL8,IL1B	59 (7)
CASP8		peptidase		-0.592		9.08e-05	CD14,CD69,FOS,IFNG,IL1B,IL2RA,S100A9	132 (19)
CD5		transmembrane receptor		-0.524	bias	9.08e-05	CCL4,CCR7,CD69,CD86,GZMB,IL2RA,RORC	77 (16)
Jnk		group	Activated	2.651	bias	9.12e-05	CCL4,CCR7,CD69,CD86,CXCL8,CXCR4,FN1,FOS,IFNG,IL1B,IL2RA,PLAUR,PON2,TIMP1	83 (14)
CpG oligonucleotide		chemical drug	Activated	2.716	bias	9.17e-05	CCL4,CCNB2,CCR8,CD14,CD40LG,CD86,CXCL8,IFI27,IFNG,IL1B,IL2RA,SYK	88 (17)
E. coli lipopolysaccharide		chemical - endogenous non-mammalian	Activated	2.314	bias	9.4e-05	CCL4,CCR7,CD86,CXCL8,IFNG,IL1B,S100A8,S100A9	99 (16)
JAG2		growth factor		-1.664	bias	9.88e-05	CCR8,CD40LG,CXCR1,IL1B,IL1RN,SPP1
TNFRSF9		transmembrane receptor		-0.342		9.88e-05	CD14,CD86,CXCL8,IFNG,IL1B,PRF1	100 (18)
galactosylceramide-alpha		chemical reagent		1.709	bias	0.000102	CD40LG,CD69,CD86,GOT1,IFNG,IL12RB2,IL1B	106 (17)
PTPN6		phosphatase		-1.673	bias	0.000102	CCR7,CD86,CXCL8,CYBB,FN1,IL1B,TIMP1	101 (15)
mir-24		microRNA		0.894		0.000102	ARHGAP19,CDKN1A,FN1,IFNG,IL2RA,NET1,RORC	105 (14)
anisomycin		chemical - endogenous non-mammalian		1.72	bias	0.000102	ATF3,CDKN1A,CXCL8,CYBB,FOS,PLAUR,SPP1	93 (16)
CCL3		cytokine	Activated	2.187	bias	0.000105	APOBEC3G,CCL4,FOS,IFNG,IL1B	78 (19)
resveratrol		chemical drug		-1.737		0.000105	ATF3,CD14,CD69,CDKN1A,CXCL8,CYBB,E2F1,FN1,FOS,IFNG,IL1B,IL2RA,IL7R,MALAT1,NRIP1,PSEN2,SPP1	111 (17)
ERK		group	Activated	3.645	bias	0.000107	APOBEC3G,CCL4,CDKN1A,CLU,CXCL8,EPAS1,FN1,FOS,GOT1,IFNG,IL1B,MAL,ODC1,RORC,TIMP1	122 (17)
IgG		complex		-0.6	bias	0.000111	CCL4,CCR2,CD69,CD86,CDKN1A,CXCL8,FN1,IFNG,IL12RB2,IL1B,IL1RN,IL2RA,LGALS1,PLAUR	84 (14)
ZBTB16		transcription regulator		0.371		0.000111	BACH2,CCR2,CD14,CD86,CDKN1A,GOT1,HPGD,IL2RA,IL7R,ODC1,PIK3R3,RORC,SPP1,TNFRSF4	106 (13)
minocycline		chemical drug	Inhibited	-2.178	bias	0.000114	ATF3,CCR2,CD86,CXCL8,CYBB,FOS,IFNG,IL1B	92 (17)
NCOR2		transcription regulator				0.000114	CD69,CDKN1A,CXCL8,FOS,IL1B,OSM,RORC	154 (22)
xanthine		chemical - endogenous mammalian		0.218	bias	0.000121	CD69,CXCR4,IL2RA,PLAUR	84 (13)
TYR		enzyme	Activated	2	bias	0.000121	CCR2,CXCR1,CXCR4,IFNG	79 (7)
muromonab-CD3		biologic drug				0.000121	CD69,GZMB,IFNG,IL2RA	147 (22)
spermidine		chemical - endogenous mammalian				0.000121	AMD1,CDKN1A,FOS,ODC1	80 (11)
MAP2K1		kinase	Activated	2.416	bias	0.000122	APOBEC3G,ATF3,CCL4,CDKN1A,CXCL8,E2F1,ENO1,FOS,ITPR1,NET1,OSM,PLAUR,TK1	141 (19)
bee venom		chemical - endogenous non-mammalian		0.404	bias	0.000125	CXCL8,CYBB,IL1B,IL4I1,KIF23,MAP3K8,OSM,PRC1,RGS2	88 (11)
PP1		chemical - kinase inhibitor	Inhibited	-2.393	bias	0.000132	CXCL8,CXCR4,FOS,IL1B,IL1RN,ODC1	102 (17)
PGF		growth factor	Activated	2.386	bias	0.000132	ATF3,CCL4,CDK1,CXCL8,CXCR4,IL1B	121 (16)
beta-estradiol		chemical - endogenous mammalian	Activated	4.412	bias	0.000134	ATF3,BPNT2,C15orf48,CCL4,CCNB2,CCR2,CD14,CD69,CD86,CDK1,CDKN1A,CLU,CTNND1,CXCL8,CXCR4,CYBB,DHCR24,DIAPH3,DRAM1,E2F1,ENO1,EPAS1,EXO1,F5,FN1,FOS,GEM,GNE,HCCS,HMGB2,HPGD,HSP90AB1,IFNG,IFT122,IL1B,IL7R,INPP4B,KMT2E,KRT5,LGALS3BP,MAL,MAMLD1,MAP3K8,MCM10,MIR17HG,NDC80,NET1,NRIP1,ODC1,P4HA2,PBK,PDGFRB,PGK1,PIK3R3,PLAUR,PON2,PRC1,PSEN2,PXMP4,RASD1,RGS2,RORC,S100A9,SLC22A5,SLC9A1,SOS2,STK3,STS,SYK,TIMP1,T…	155 (20)
OPRD1		G-protein coupled receptor				0.00014	GZMB,IFNG,PRF1	93 (16)
CD226		other				0.00014	CD69,GZMB,IFNG	65 (7)
emodin		chemical drug	Inhibited	-2	bias	0.000143	CD86,CDKN1A,CXCL8,CXCR4,FN1,IL1B,IRF5	109 (19)
heme		chemical - endogenous mammalian		0.378	bias	0.000143	CCL4,CD14,CD86,CYBB,IFNG,IL1B,SLC48A1	116 (17)
imiquimod		chemical drug	Activated	2.578	bias	0.000146	CCL4,CCR7,CXCL8,FOS,IFNG,IL1B,IL1RN,IL2RA,S100A9	105 (18)
lactacystin		chemical - protease inhibitor	Activated	2.333	bias	0.000149	ATF3,BAG3,CD69,CDKN1A,CPOX,CXCL8,CXCR4,E2F1,FANCC,HMGB2,MCM10,P4HA2,SYK	150 (26)
EP400		other		-0.254	bias	0.000151	AGPAT2,CDKN1A,E2F1,FBXO5,IFNG,SKA1
fluticasone propionate		chemical drug		-0.916		0.000152	CD86,CXCL8,HPGD,IFI27,IL1B,IL1RN,IRF8,S100A8,SPP1,TBC1D16,TIMP1,WARS1	107 (14)
IFN Beta		group	Activated	2.162	bias	0.000152	ATF3,BST2,CCR7,CD69,CD86,CDKN1A,CXCL8,FN1,IFI27,IFNG,IL1B,IL1RN	108 (16)
IL17C		cytokine	Activated	2.201	bias	0.000154	CXCL8,IFNG,IL1B,S100A8,S100A9	92 (10)
HSPB1		other		0.651		0.000154	CCNB2,CDK1,CDKN1A,CXCL8,IL1B	109 (18)
MAP2K2		kinase				0.000154	CDKN1A,E2F1,FOS,IL1B,PLD1	125 (21)
ozone		chemical toxicant		1.486	bias	0.000154	CXCL8,FOS,IFNG,IL1B,SPP1	92 (13)
FSH		complex	Activated	2.188		0.000156	CTNND1,CXCR4,FOS,GEM,GNLY,GOT1,GZMB,IL1RN,ITPR1,LGALS1,MAMLD1,NPC2,P4HA2,PGK1,RHOB,SMAD5,TIMP1,TK1,TRIB1,ZNF331	114 (18)
CAMP		other	Activated	2.526	bias	0.000157	CCL4,CCR7,CD86,CXCL8,CXCR4,IL1B,IL1RAP,IL1RN,PDGFRB	102 (19)
N-nitro-L-arginine methyl ester		chemical drug		-0.12		0.000157	ATF3,CD86,CXCL8,CYBB,FN1,IFNG,IL1B,PERP,TIMP1	115 (16)
SRC		kinase	Activated	3.068	bias	0.000158	CDK1,CDKN1A,CTNND1,CXCL8,ENO1,FN1,FOS,PGK1,PLAUR,SPP1	141 (19)
BNIP3L		other		0.378		0.000159	E2F1,EIF2AK1,IL1B,LTA,NUF2,PDGFRB,SYK
monophosphoryl lipid A		chemical drug		1.997	bias	0.000162	CD86,IFNG,IL1B,IL1RN	98 (17)
clarithromycin		chemical drug		-1.698		0.000162	CXCL8,FN1,IFNG,IL1B	122 (18)
CHRNA1		transmembrane receptor		-0.577	bias	0.000162	CD40LG,CD69,CD86,IFNG	80 (7)
AIMP1		cytokine		1.969	bias	0.000162	CCL4,CXCL8,IFNG,IL1B	88 (17)
Histone h4		group				0.000165	CCL4,CD69,CDK1,CDKN1A,CXCL8,E2F1,FOS,IL1B,IL2RA,SPP1,TNFRSF4	136 (20)
GNAQ		enzyme				0.000169	ATF3,CXCL8,FOS,IFNG,IL1RN,MAP3K8,NFIA,PLAUR,RHOB,SLCO4A1	105 (17)
NS-398		chemical reagent	Inhibited	-2.621	bias	0.00017	CDKN1A,CXCL8,CXCR4,IFNG,IL1B,IL2RA,S100A8,S100A9,SPP1	95 (18)
filgrastim		biologic drug		-0.351		0.000171	ARRB1,ATF3,CCL4,CD59,CD69,CLU,CXCL8,CXCR4,CYBB,ENO1,F5,FCER1G,GZMB,HPGD,IL1RAP,JARID2,MS4A6A,NDC80,PLAUR,SPP1,STK3
resiquimod		chemical drug	Activated	3.252	bias	0.000172	APOBEC3G,ATF3,BST2,CCL4,CCR7,CD86,CXCL8,FCER1G,FH,IFNG,IL1B,IL2RA,LTA,RIPK2,SPP1,WARS1	91 (18)
PTPRC		phosphatase		1.067		0.000173	CCL4,CXCL8,CXCR1,IFNG,IL1B,SLFN12	85 (17)
CXCL12		cytokine	Activated	2.541	bias	0.000173	CD14,CD40LG,CD69,CXCL8,CXCR4,FN1,FOS,IFI27,IFNG,IL1B,IL2RA,RRAS,TIMP1	99 (15)
vitamin D		chemical drug		-0.447		0.000177	CDK1,CDKN1A,IFI27,IFNG,IL1B,S100A8,SPP1	113 (18)
rosiglitazone		chemical drug		-1.012	bias	0.000178	CCR2,CD86,CDKN1A,CERT1,CXCL8,ELOVL6,FN1,FOS,GOT1,HPGD,IFNG,IL1B,IL1RN,IL7R,ITGAD,PDGFRB,RGS2,S100A8,S100A9,SLC27A2,SLC9A1,TIMP1	114 (19)
JUND		transcription regulator		1.325	bias	0.000178	CLU,CYBB,HPGD,IFNG,PLAUR,SPP1,TIMP1,TK1	138 (18)
Nfat (family)		group	Activated	2.138	bias	0.000183	ATF3,CD40LG,CXCL8,CYBB,IFNG,ITPR1,LAG3,LTA,TRAF3	123 (20)
CpG ODN 2216		chemical reagent		0.64	bias	0.000184	BST2,CD69,CD86,IFNG,IL1B	92 (17)
NCF1		enzyme		1.98	bias	0.000184	CD14,CDKN1A,FN1,IFNG,IL12RB2	121 (19)
CD69	1.327	transmembrane receptor		0.277		0.000184	CD69,IL1B,IL2RA,RORC,S100A9	135 (18)
trichostatin A		chemical drug		1.237		0.000187	ABCE1,CCNB2,CCR7,CD14,CD40LG,CD86,CDK1,CDKN1A,CLU,CXCL8,CXCR4,CYBB,ELOVL6,FN1,FOS,HDAC9,IFNG,IL1B,IL1RAP,IL2RA,IRF8,LGALS1,LIN9,MAMLD1,OSM,PKN3,PON2,RECQL4,RHOB,SLC43A1,SPP1,TIMP1,TK1,TRAF3	110 (15)
U0126		chemical - kinase inhibitor	Inhibited	-4.435	bias	0.000189	APOBEC3G,ATF3,CCL4,CCR2,CD40LG,CD69,CDKN1A,CXCL8,CYBB,ELOVL6,FN1,FOS,HPGD,HSP90AB1,IFNG,IL1B,IL1RAP,PLAUR,PLD1,RORC,S100A9,SPP1,SYK,TRIB1	104 (15)
wortmannin		chemical - kinase inhibitor	Inhibited	-2.528	bias	0.000191	ARRB1,ATF3,CCL4,CD14,CDKN1A,CXCL8,E2F1,FN1,FOS,IFNG,IL1B,IL2RA,IRF8	97 (19)
CXCR4	1.336	G-protein coupled receptor		1.964	bias	0.000196	CD69,CDKN1A,CXCL8,CXCR4,IL2RA,PGK1,RRAS	119 (16)
carbon monoxide		chemical - endogenous mammalian		-1.1	bias	0.000196	CCL4,CD14,CDKN1A,FN1,IL1B,IRF8,PLAUR	133 (21)
Collagen type II		complex		0.896		0.000197	CCR2,IFNG,IL1B,IL1RN,MAP3K8,RRAS	99 (14)
ANXA1		enzyme		0	bias	0.000197	CD69,CD86,CXCR4,IL1B,IL2RA,RORC	94 (16)
NR1H3		ligand-dependent nuclear receptor		-1.886		0.000211	ATF3,CCL4,CCNB2,CCR2,CCR7,CDK1,CDKN1A,IFNG,IL1B,IL1RN,KIF23,LAG3,PRC1,TRIB1	91 (12)
BCL10		transcription regulator		1.949	bias	0.000213	CCL4,CXCL8,IFNG,IL2RA	87 (15)
erythromycin		chemical drug		-1.993	bias	0.000213	CD86,CXCL8,IFNG,IL1B	110 (19)
rebamipide		chemical drug		-1.117	bias	0.000213	CXCL8,IFNG,PLD1,TIMP1	84 (14)
Fcer1		complex	Activated	2.204	bias	0.000217	CCL4,CXCL8,FOS,IFNG,IL1B,IL1RN,ITPR1	118 (18)
S100A6		transporter		0.447		0.000219	ATF3,CDK1,CXCL8,NCAPH,PBK	96 (7)
CFLAR		other		-0.958	bias	0.000219	CXCL8,FOS,IFNG,IL1B,IL2RA	83 (15)
cisplatin		chemical drug		1.374	bias	0.000222	ANKFY1,ASCC1,ATF3,CD14,CDK1,CDKN1A,CLCN6,CLU,CTNND1,CXCL8,CYBB,DRAM1,E2F1,FN1,FNDC3B,FOS,GTPBP4,HDAC9,HJURP,IFNG,IL1B,MIER3,NRIP1,ODC1,P4HA2,SLC22A5,SPP1,TIMP1,TRIAP1,UBE4B,WDR4	138 (19)
troglitazone		chemical drug		-1.018		0.000236	ABHD2,ATF3,CD59,CD86,CDKN1A,CXCL8,E2F1,ECT2,FN1,FOS,IFNG,IL1B,KIF14,NCAPH,NRIP1,NUF2,RASD1,SLC9A1,SPP1	140 (18)
diphenyleneiodonium		chemical reagent	Inhibited	-2.595	bias	0.000239	ATF3,CXCL8,EPAS1,FN1,FOS,IL1B,TIMP1	120 (17)
mifepristone		chemical drug		-1.679		0.000241	ATF3,CCR2,CD14,CDKN1A,CLU,CTNND1,CTSF,CYBB,FOS,HPGD,IL1B,NQO2,RGS2,RHOB,SPP1,TIMP1,TK1	116 (19)
blinatumomab		biologic drug				0.000241	CCL4,CXCL8,IFNG
Tlr11		transmembrane receptor				0.000241	CXCL8,IFNG,IL1B	92 (17)
TRIM29		transcription regulator				0.000241	CDKN1A,IFNG,TAB2
SELL		transmembrane receptor				0.000241	CXCR4,IFNG,IL1B	95 (16)
ULBP2		transmembrane receptor				0.000241	CCL4,IFNG,LTA	60 (9)
TSC22D1		transcription regulator				0.000241	CXCL8,FN1,IL1B	113 (12)
diazepam		chemical drug				0.000241	CXCL8,FOS,IFNG	90 (11)
manidipine		chemical drug				0.000241	CXCL8,FOS,IL1B	64 (7)
borrelia burgdorferi strain B31 peptidoglycan		chemical reagent				0.000241	CXCL8,IFNG,IL1B
atorvastatin		chemical drug		-0.494		0.000242	ARRB1,CD40LG,CD59,CD69,CXCL8,CXCR4,CYBB,DHCR24,FOS,IFNG,IL2RA,RHOB,SPP1	137 (19)
2-(4-amino-1-isopropyl-1H-pyrazolo[3,4-d]pyrimidin-3-yl)-1H-indol-5-ol		chemical reagent		-1.731		0.000244	AKAP9,ATF3,CXCL8,DHCR24,EXO1,GINS1,IL1RN,KIF14,KIF18B,MCM10,RFC5,TK1
IL12A		cytokine	Activated	2.282	bias	0.000253	CD86,IFNG,IL12RB2,IL1B,LTA,PRF1	94 (19)
ICOS		transmembrane receptor	Activated	2.217	bias	0.000253	CCR8,CD40LG,CXCR4,IFNG,IL2RA,RORC	109 (19)
VIP		other		-0.279		0.000262	CCL4,CD86,CXCL8,FOS,IFNG,IL1B,IL2RA,LGALS1,PRF1	94 (18)
GLI2		transcription regulator		0.678	bias	0.000262	CCL4,CD40LG,CDK1,CDKN1A,CLU,E2F1,IFNG,IL1B,SPP1	125 (13)
BCL2		transporter		0.855	bias	0.000262	CDK1,CDKN1A,CXCL8,FOS,IFNG,IL1B,PLAUR,PRF1,TIMP1	137 (17)
PDGFB		growth factor	Activated	2.575	bias	0.000264	CXCL8,FN1,FOS,IL1RN,PDGFRB,SPP1,TIMP1	125 (18)
CCN1		other		1.948	bias	0.00027	CCL4,CDKN1A,CXCL8,FCER1G,FN1,IFNG,IL1B,TIMP1	113 (16)
F2		peptidase	Activated	3.629	bias	0.000272	ALDH1B1,CDKN1A,CLU,CXCL8,CXCR4,CYBB,FN1,FOS,HDAC9,IL1B,OSM,PLAUR,RHOB,SRGN,TRAF3	108 (15)
DICER1		enzyme		-1.929		0.000273	APOBEC3G,CCR2,CD160,CD86,CDKN1A,CXCL8,CXCR4,DHCR24,FOS,GZMB,IFNG,IL1B,IL2RA,IL7R,IRF8,PRF1	104 (19)
actinomycin D		biologic drug		-0.973	bias	0.000274	CDKN1A,CXCL8,EPAS1,FN1,FOS,IFNG,IL7R,LTA,OSM,PERP,PLAUR,RGS2,RIPK2,SPP1	92 (14)
E2F7		transcription regulator				0.000274	CDK1,E2F1,ECT2,KIF23
LBP		transporter				0.000274	CD14,CXCL8,IL1B,IL1RN	85 (19)
HAVCR2		other		-0.254		0.000274	CDKN1A,CXCR4,IFNG,IL1B	88 (15)
JAK2		kinase	Activated	2.407	bias	0.000275	CDKN1A,CXCL8,CXCR1,CYBB,F5,FN1,FOS,IL1B,NKG7,ODC1,OSM	98 (18)
TNFSF11		cytokine	Activated	2.758	bias	0.000283	CCL4,CD14,CDKN1A,CXCL8,ECT2,FOS,IFNG,IL1B,IL1RN,IRF8,PLAUR,PLD1,RHOB,RRAS,SPP1	99 (15)
SPHK1		kinase		-0.048	bias	0.000285	CDKN1A,CXCL8,FN1,IFNG,IL1B,TIMP1	84 (15)
APOE		transporter		-1.948	bias	0.000288	ATF3,CCL4,CD40LG,CD86,CLU,CYBB,FOS,HSP90AB1,IFNG,IL1B,IL1RN,NQO2,PHF21A,S100A8,S100A9,SPP1,TIMP1	113 (18)
azoxymethane		chemical toxicant		0.689	bias	0.00029	CCL4,CDKN1A,FANCB,IFNG,IL1B,ODC1,PARP2	121 (20)
CHUK		kinase	Activated	3.23	bias	0.000291	ATF3,CCL4,CDKN1A,CLU,CTSF,CXCL8,E2F1,FOS,IFNG,IL1B,IL1RN,SPP1,TK1	92 (13)
YY1		transcription regulator		-0.923		0.000295	ABCE1,CAPG,CCNB2,CDKN1A,CLU,CXCR4,CYBB,FOS,IFNG,IL1B,KIF23,PERP,PRC1,TGFBI,TIMP1,TNFRSF4	154 (19)
RAS		group	Activated	2.742	bias	0.000297	CDKN1A,CXCL8,FN1,FOS,IFNG,IL1B,MIR17HG,ODC1,PLAUR,PLD1	124 (16)
pyrrolidine dithiocarbamate		chemical reagent	Inhibited	-2.942	bias	0.0003	CCR2,CXCL8,CXCR4,GZMB,IFNG,IL1B,PGK1,PLD1,PRF1	120 (17)
berberine		chemical drug		-0.218	bias	0.0003	CD86,CDKN1A,CXCL8,FN1,IFNG,IL1B,PIK3R3,RORC,TIMP1	85 (15)
bucladesine		chemical toxicant	Activated	2.108	bias	0.000305	CD14,CD40LG,CD86,CDKN1A,CLU,CXCL8,CXCR4,FN1,FOS,GEM,IFNG,IL1B,NPHP4,ODC1,OSM,RGS2,SRGN,TIMP1	105 (17)
10E,12Z-octadecadienoic acid		chemical - endogenous mammalian	Activated	2.738		0.000307	ADAM12,ATF3,CXCL8,EXO1,IL1B,IL1RN,MCM10,NDC80,PBK,RORC,TK1	91 (14)
STAT6		transcription regulator		1.229		0.00031	CCR7,CD69,CDKN1A,CPOX,CYBB,CYRIA,FCER1G,IFNG,IL1B,IL1RN,IL2RA,IL4I1,LGALS3BP,LTA,PLD1,SERPINB6,SYK,TIMP1,TMED8,TXK	110 (15)
TAC1		other	Activated	2.589	bias	0.000316	CCL4,CXCL8,CXCR4,FOS,IFNG,IL1B,IL1RN,PRF1	97 (18)
Hsp27		group		0.034		0.000321	CD14,CD40LG,CD86,CDKN1A,CXCL8,FOS	92 (17)
herbimycin		chemical - kinase inhibitor		-1.039	bias	0.000321	CXCL8,CXCR1,CXCR4,FOS,IL1B,IL2RA	92 (15)
KDM5B		transcription regulator	Inhibited	-3.153	bias	0.000335	CDK1,DHCR24,E2F1,ECT2,FBXO5,LGALS3BP,NCAPH,NDC80,PBK,SWAP70
Hsp90		group		0.526	bias	0.000342	BAG3,CD40LG,CD69,CDK1,CLU,EPAS1,FN1,IFNG	115 (17)
SYK	9.069	kinase	Activated	2.18		0.000343	CCL4,CCR7,CD40LG,CD69,CXCL8,CXCR4,FCER1G,IL1B,PLEKHG1	106 (18)
N(6)-(3-iodobenzyl)-5'-N-methylcarboxamidoadenosine		chemical drug		-1.96	bias	0.000347	FOS,IFNG,RGS2,SLC9A1	73 (11)
glycine		chemical - endogenous mammalian		0.689		0.000347	CDKN1A,FOS,IL1B,ODC1	94 (17)
PLC		group	Activated	2	bias	0.000347	CD40LG,CXCL8,FOS,ODC1	97 (15)
IL17R		complex		1.964	bias	0.000347	CXCL8,S100A8,S100A9,TIMP1	65 (7)
Cyp2c23		enzyme		-0.035		0.000347	CCNB2,CCR2,CD86,F5
CD46		transmembrane receptor		-1		0.000347	CD69,GZMB,IFNG,IL2RA	94 (21)
superoxide		chemical - endogenous mammalian		0.762	bias	0.000347	CLU,FN1,IL1B,TIMP1	121 (18)
TGAL copolymer		biologic drug		0.533		0.000347	CXCL8,IFNG,IL1B,IL1RN	96 (15)
TLR7		transmembrane receptor	Activated	2.461	bias	0.000348	ATF3,CCL4,CCR7,CD300A,CD69,CD86,CDKN1A,CXCL8,FCER1G,IFNG,IL1B,IL4I1,LTA	93 (15)
etanercept		biologic drug	Inhibited	-2.216	bias	0.000354	CXCL8,CYBB,GZMB,IFNG,IL1B	98 (16)
TIRAP		other		-0.223	bias	0.000354	CCL4,CD86,CXCL8,IFNG,IL1B	96 (17)
TNFSF15		cytokine		1.449	bias	0.000354	CCR7,CD86,CXCL8,IFNG,IL2RA	90 (17)
SMAD3		transcription regulator		1.538	bias	0.000358	ADAM12,CCL4,CD59,CDKN1A,FN1,FOS,GZMB,IFNG,IL1B,IL2RA,NET1,RHOB,SMAD5,SPP1,TIMP1	133 (18)
IRF9		transcription regulator		0.152		0.00036	CD69,CXCL8,IFI27,IFNG,IRF5,IRF8	72 (16)
TXN		enzyme		0.626		0.00036	CD86,CDKN1A,CXCL8,FOS,IFNG,IL1B	90 (15)
JAK3		kinase		0		0.00036	CD40LG,IFNG,IL2RA,IL7R,LAG3,RORC	102 (19)
VCAN		other		0.603		0.00036	CD59,CDKN1A,CLU,CXCL8,FN1,IFNG,IL1B,IL1RN,IRF8,RGS2,TIMP1	102 (18)
ANO6		ion channel				0.000377	IFNG,IL2RA	68 (7)
KIR2DS2 (includes others)		transmembrane receptor				0.000377	CD69,IFNG	64 (7)
PLPP3		phosphatase				0.000377	CTNND1,FN1
potassium superoxide		chemical toxicant				0.000377	IFNG,IL12RB2
Z-YVAD-FMK		chemical reagent				0.000377	CXCL8,IL1B	107 (11)
ultrasmall silica nanoparticle		chemical reagent				0.000377	CD69,IL2RA
teleocidins		chemical toxicant				0.000377	FOS,ODC1
EGR1		transcription regulator	Activated	2.805	bias	0.000379	ATF3,CCL4,CCR2,CD40LG,CDKN1A,CLU,CXCL8,FN1,HPGD,IL1B,SPP1,TIMP1	118 (20)
PPT1		enzyme				0.00038	CCL4,IFNG,OSM
FANCA		other				0.00038	CDKN1A,FANCG,IL1B	47 (7)
CD33		other				0.00038	CXCL8,IFNG,IL1B	89 (17)
FYB1		other				0.00038	CD69,IFNG,IL2RA	91 (14)
mechlorethamine		chemical drug				0.00038	ATF3,IL1B,PIK3R3	96 (7)
levofloxacin		chemical drug				0.00038	CDKN1A,CXCL8,IFNG
CCR2	2.601	G-protein coupled receptor		1.904	bias	0.000391	CCL4,CCR2,CD86,CXCR4,FN1,IFNG,IL1B,TGFBI,TIMP1	106 (18)
miR-155-5p (miRNAs w/seed UAAUGCU)		mature microRNA	Inhibited	-3.232	bias	0.000399	ANKFY1,ARFIP1,CCL4,CD69,CXCL8,IFNG,IL1B,JARID2,RIPK1,TAB2,TRIP13	82 (11)
BSG		transporter		1.718	bias	0.000402	CD40LG,CXCL8,EPAS1,IL1B,IL2RA,PLAUR	113 (18)
IL13		cytokine		1.006	bias	0.000404	ATF3,CCL4,CD14,CD86,CXCL8,CXCR4,CYBB,DHCR24,EPAS1,IFNG,IL1B,IL1RN,NCAPH,PCM1,RIPK2,RORC,S100A8,SPP1,SWAP70,TIMP1	131 (18)
IL23A		cytokine	Activated	2.169	bias	0.000411	IFNG,IL1B,RORC,S100A8,S100A9	93 (14)
IL17RA		transmembrane receptor	Activated	2.228	bias	0.000411	CXCL8,IL1B,S100A8,S100A9,TIMP1	98 (16)
RUNX1		transcription regulator		-0.582		0.000413	CD160,CDKN1A,CPOX,EPAS1,GPATCH4,IFNG,IL1B,IL2RA,IL7R,MIR17HG,RORC,S100A9,SPP1,TIMP1	117 (17)
Pkc(s)		group		1.695	bias	0.000414	ATF3,CCR2,CDKN1A,CXCL8,CXCR4,CYBB,FN1,FOS,HPGD,IL1B,RGS2,S100A8,SPP1	119 (21)
CCL2		cytokine		1.355	bias	0.000428	CCR2,CD40LG,CD86,CXCL8,FOS,IFNG,IL1B,TIMP1	112 (16)
Tcf7		transcription regulator		-0.464		0.000432	CCL4,CCR2,CD69,CDK1,DHCR24,GEM,IFNG,IL2RA,IL7R,LAG3,PRF1,RORC,SLC35D1	83 (7)
IL3		cytokine	Activated	2.991	bias	0.000433	CD14,CD40LG,CD69,CD86,CDKN1A,CXCL8,CXCR4,FOS,GPRIN1,IL1B,IL2RA,LTA,ODC1,OSM,SMAD5,TK1,TNFRSF4	124 (17)
Srebp		group				0.000433	CDKN1A,FOS,GZMB,IFNG
prostaglandin E1		chemical - endogenous mammalian		-0.132	bias	0.000433	CD14,CD86,FOS,IFNG	109 (20)
TEK		kinase		1.96	bias	0.000433	CDKN1A,IFNG,S100A8,S100A9	67 (8)
TREM2		transmembrane receptor		-0.832		0.000433	CCR7,CD86,IL1B,IRF8	88 (14)
RORA		ligand-dependent nuclear receptor		0.295	bias	0.000437	CCL4,CXCL8,DHCR24,ELOVL6,GOT1,HPGD,IFNG,IL1B,ITPR1,RORC,S100A8,S100A9	110 (13)
vancomycin		biologic drug		0.528		0.000437	CD14,CD69,CLU,FOS,GTPBP4,IFNG,LAG3,LGALS1,NRIP1,SLCO4A1,SPP1,TIMP1
l-asparaginase		biologic drug	Inhibited	-3	bias	0.000445	CCNB2,CDK1,CDKN1A,CENPN,EXO1,KIF18B,NCAPH,NDC80,NUF2
SOCS1		other	Inhibited	-2.373	bias	0.000447	CCR7,CD69,CD86,CDKN1A,CXCL8,FCER1G,FOS,IFI27,IFNG,IL1B	91 (20)
SP110		transcription regulator		-1.897		0.000447	ARRB1,ATF3,BST2,CLU,E2F1,IFI27,PERP,RIPK1,RIPK2,TIMP1
monocrotaline		chemical toxicant		0.463		0.000448	CYBB,HSP90AB1,IL1B,SLC9A1,SMAD5,SPP1	82 (10)
NFKBIA		transcription regulator	Activated	2.172		0.000453	CD69,CD86,CDKN1A,CLU,CTSF,CXCL8,CXCR4,FN1,FOS,GZMB,IFNG,IL1B,IL1RN,IL2RA,IL7R,ITPR1,RIPK1,S100A8,S100A9,TIMP1	101 (16)
DDX58		enzyme	Activated	2.207	bias	0.000456	CCL4,CXCL8,GEM,IFI27,IL1B,IRF8,SPP1	88 (19)
lipoteichoic acid		chemical - endogenous non-mammalian	Activated	2.588	bias	0.000456	CD14,CD86,CXCL8,CXCR4,CYBB,IL1B,IL1RN	103 (16)
EGF		growth factor	Activated	3.252	bias	0.000465	ATF3,CDK1,CDKN1A,CLU,CXCL8,CXCR4,E2F1,EPAS1,FN1,FOS,HPGD,IL1B,IL7R,KRT5,ODC1,PBK,PDGFRB,PLAUR,RHOB,S100A9,SPP1,TIMP1,TNFRSF4	161 (19)
TGFB2		growth factor		0.88	bias	0.000474	CD59,CD86,FN1,FOS,IFNG,PDGFRB,S100A8,SPP1,TIMP1	149 (20)
trinitrobenzenesulfonic acid		chemical reagent	Activated	2.728	bias	0.000495	ADAM12,CCL4,FOS,IFNG,IL1B,S100A8,S100A9,TIMP1	117 (13)
ETS2		transcription regulator	Activated	2.213	bias	0.000496	CDKN1A,FOS,HPGD,IL2RA,PRIM2,SPP1,SYK	101 (18)
HDAC2		transcription regulator		-0.975		0.000528	CDKN1A,CXCL8,CYBB,ITGAD,MCM10,PRIM2,RHOB,RORC,S100A9,SLC35D1	87 (10)
CDK4		kinase				0.000528	CDKN1A,CENPN,HJURP,MTFR2,NCAPH,RFC5,RGS2,TPX2,TRIP13,ZFP28	103 (10)
CALCA		other		0.936	bias	0.000532	CCL4,CD86,CXCL8,CXCR4,DISC1,FOS,ODC1,PHLDB2	100 (16)
STAP2		other		0.577	bias	0.000533	CCR2,CCR7,CXCR1,CXCR4	65 (7)
CDK5R1		kinase		0	bias	0.000533	CD14,CXCL8,FOS,IL1B	135 (22)
PIM2		kinase		1.225	bias	0.000533	E2F1,IFNG,IL12RB2,IL2RA	62 (7)
LGALS9		other		0.728		0.000533	CDKN1A,CXCR4,IFNG,IL1B	85 (12)
S-(2,3-bispalmitoyloxypropyl)-cysteine-GDPKHPKSF		chemical reagent		1.96	bias	0.000533	CCL4,CD86,CXCL8,IFNG	99 (14)
tetrachlorodibenzodioxin		chemical toxicant		0.585		0.000539	BACH2,CD86,CDKN1A,CXCL8,E2F1,FOS,HDAC9,IFNG,IL1B,IL2RA,NFYB,ODC1,PERP,S100A8,S100A9,SLC22A5,SLCO3A1,TK1	141 (19)
AGER		transmembrane receptor		1.817	bias	0.00054	CCL4,CD40LG,CDKN1A,CXCL8,IL1B,S100A8,S100A9	117 (18)
KITLG		growth factor	Activated	3.25	bias	0.000544	CCL4,CD14,CDKN1A,CLU,CREG1,CXCL8,CXCR4,DHCR24,FOS,IFNG,IL1B,IL1RN,OSM,SYK	106 (19)
resolvin D1		chemical - endogenous mammalian		-1.459	bias	0.000545	CXCL8,CXCR4,IFNG,IL1B,IRF5	100 (20)
ITGAM		transmembrane receptor				0.000545	CCL4,CD86,CXCL8,IL1B,TIMP1	89 (18)
PRKCQ		kinase		1.458	bias	0.000545	CD69,CDKN1A,IFNG,IL2RA,TNFRSF4	111 (18)
TERC		other				0.000545	CDKN1A,CLU,MCM10,PRC1,S100A9
IL36A		cytokine		1.991	bias	0.000545	CXCL8,IFNG,IL1B,S100A8,S100A9	88 (15)
diclofenac		chemical drug		0.489		0.000545	CDKN1A,FOS,HPGD,IFNG,IL2RA	98 (19)
bromodeoxyuridine		chemical drug		1.664	bias	0.000553	CXCL8,IFI27,IFNG,IL1B,IL7R,TGFBI	66 (11)
AHR		ligand-dependent nuclear receptor		1.179		0.000556	ALDH1B1,CD14,CDK1,CDKN1A,E2F1,ENO1,FN1,FOS,GOT1,HDAC9,IFNG,IL1B,NFYB,PDGFRB,RORC,SPP1,TGFBI,TK1	156 (19)
Pka		complex		1.362	bias	0.000557	CCR7,CCR8,CD14,CDKN1A,E2F1,FOS,IFI27,IFNG,PLD1,RGS2	100 (22)
tocilizumab		biologic drug				0.000562	CCL4,CXCL8,IFNG	71 (10)
CD244		transmembrane receptor				0.000562	CCL4,FOS,IFNG	112 (16)
TRG		other				0.000562	FCER1G,IFNG,IL1B
DKK2		other				0.000562	CD69,IFNG,SPP1	36 (3)
SPN		transmembrane receptor				0.000562	CD40LG,CD69,IFNG	89 (16)
cyclic guanosine monophosphate-adenosine monophosphate		chemical - endogenous non-mammalian				0.000562	CD86,CXCL8,IL1B	62 (7)
DNMT3A		enzyme		-0.492		0.000567	ABCD1,CXCR4,CYBB,E2F1,EXO1,FCER1G,IFNG,IRF5,IRF8,RECQL4,SPP1	83 (7)
pioglitazone		chemical drug		0.461		0.000567	CD86,CDKN1A,CXCL8,EPAS1,FN1,FOS,HPGD,IFNG,IL1B,IL1RN,NCEH1	92 (16)
IKBKB		kinase		1.869	bias	0.000578	ATF3,CCL4,CCR7,CDKN1A,CLU,CTSF,CXCL8,CXCR4,ECT2,FOS,IFNG,IL1B,IL1RN,KIF23,TNFRSF4	99 (15)
ursolic acid		chemical drug		0.756		0.000587	ATF3,CD69,CDKN1A,CXCR4,FOS,IL1B,MAL	101 (17)
CSF1		cytokine	Activated	3.67	bias	0.000587	CDKN1A,CYBB,DHCR24,ENO1,FCER1G,FN1,FOS,IFNG,IL1B,IRF5,IRF8,LAG3,RIPK1,SPP1	103 (20)
Akt		group		1.313	bias	0.000591	CCR7,CD40LG,CDKN1A,CXCL8,CXCR4,EPAS1,FN1,FOS,HPGD,IFNG,IL1B,IL7R,NCEH1,NET1,RASD1,RHOB,SLC22A5,SPP1	130 (20)
SMARCB1		transcription regulator		-0.502	bias	0.000595	BAG3,CDK1,CDKN1A,CXCR4,E2F1,FOS,IFNG,KIF23,MCM10,RFC5,SMAD5	152 (20)
EDN1		cytokine		0.99	bias	0.000599	ADAM12,CCR7,CDK1,CTNND1,CXCL8,CXCR4,CYBB,FN1,FOS,ODC1,PLAUR,TIMP1	105 (15)
JQ1		chemical reagent	Inhibited	-2.975	bias	0.000606	CXCR4,DHCR24,E2F1,FOS,GINS1,IL2RA,KDM3A,KIF23,RORC	121 (14)
cholecalciferol		chemical - endogenous mammalian		0.467	bias	0.000606	CD14,CD300A,CD86,E2F1,FOS,MS4A6A,PDGFRB,RORC,SPP1	151 (24)
AGT		growth factor	Activated	4.122	bias	0.000611	ADAM12,ATF3,CCL4,CCR2,CCR7,CD14,CD86,CDK1,CDKN1A,CXCL8,CYBB,FN1,FOS,HMGB2,IFNG,IL1B,LTA,RGS2,RRAS,SLC9A1,SOS2,SPP1,TIMP1	93 (15)
AG490		chemical - kinase inhibitor	Inhibited	-2.746	bias	0.000612	CDKN1A,CXCL8,FOS,HPGD,IFNG,IL1B,SPP1,TIMP1	125 (19)
platelet activating factor		chemical - endogenous mammalian		1.706	bias	0.000612	CD69,CDKN1A,FN1,FOS,PLAUR,TIMP1	117 (17)
L-methionine		chemical - endogenous mammalian				0.000612	CCNB2,CDK1,CLU,PRC1,RHOB,SPP1
Rock		group		1.715	bias	0.000612	CDKN1A,CXCL8,FN1,FOS,MIR17HG,SPP1	123 (18)
GJA1		transporter		0.447		0.000623	CD69,CDKN1A,IL1B,IL2RA,SPP1	86 (15)
cardiotoxin		chemical - other	Activated	2.53	bias	0.000625	CCL4,CCR2,CXCR4,E2F1,IL1B,IL1RN,IL7R,S100A8,S100A9,SPP1,TIMP1
Sos		group				0.000626	ADAM12,CTNND1,ELOVL6,FOS,LGALS3BP,LIN9,NET1,NRIP1,ODC1,PLD1,RIPK1,STK3	71 (7)
Hif1		complex				0.000636	CDKN1A,CXCR4,ENO1,FN1,LGALS1,PGK1,S100A8	84 (7)
staurosporine		chemical - kinase inhibitor		-0.516		0.000643	CCL4,CDKN1A,CREG1,CXCL8,FOS,IL1B,IL1RAP,ODC1,TK1	101 (19)
ULK4		kinase	Inhibited	-2	bias	0.000649	LGALS3BP,NPHP4,PCM1,POC5
CpG ODN 2395		chemical reagent	Activated	2	bias	0.000649	CCL4,CD14,CD86,IL1B	104 (17)
SP100		transcription regulator				0.000649	CD14,CDKN1A,FOS,HSPA6	63 (7)
GDF15		growth factor		1.177		0.000649	CCR2,CDKN1A,CTNND1,PLAUR
SCGB1A1		cytokine		-1.987	bias	0.000649	FN1,IFNG,S100A8,S100A9	90 (14)
tranilast		chemical drug		-0.882	bias	0.000649	CD86,CDKN1A,CXCL8,IFNG	123 (19)
W7		chemical reagent		-0.832	bias	0.000649	CD14,CD86,CXCL8,FOS	86 (18)
TGFBR2		kinase	Activated	2.023		0.000654	CD14,CDKN1A,CLU,FN1,HPGD,IFNG,IL1B,IL1RAP,RFC5,SPP1,TAB2,TIMP1	114 (18)
CEBPA		transcription regulator	Activated	3.513	bias	0.000669	AGPAT2,CCL4,CCNB2,CD14,CDKN1A,CREG1,CXCL8,CXCR4,E2F1,FOS,HPGD,IFI27,IL1RN,KDM3A,LGALS1,RGS2,S100A8,S100A9,SPP1,TRIB1	142 (24)
HDL		complex	Inhibited	-2.407	bias	0.000676	ATF3,CCR2,CD40LG,CD86,CXCL8,IL1B	85 (15)
CAT		enzyme		-0.323	bias	0.000676	CD69,CDKN1A,CXCL8,FN1,IL2RA,TIMP1	118 (15)
PARP1		enzyme		0.707	bias	0.000682	CDKN1A,E2F1,FOS,IFNG,IL1B,IL2RA,ITPR1,LGALS3BP,PRIM2	102 (16)
TNF		cytokine	Activated	4.447	bias	0.000688	ATF3,BST2,C15orf48,CCL4,CCR2,CCR7,CCR8,CD14,CD40LG,CD59,CD69,CD86,CDKN1A,CERT1,CLU,CTSF,CXCL8,CXCR1,CXCR4,CYBB,E2F1,FCER1G,FN1,FOS,GEM,HDAC9,HPGD,HSP90AB1,IFI27,IFNG,IL1B,IL1RN,IL2RA,IL4I1,IL7R,IRF5,IRF8,ITPR1,JARID2,MAP3K8,NET1,NRIP1,ODC1,OSM,PLAUR,RASD1,RGS2,RHOB,RIPK1,RIPK2,S100A8,S100A9,SPP1,TIMP1,TK1,TNFRSF4,TRAF3	105 (14)
TBX2		transcription regulator		0.788	bias	0.000689	ATF3,CCNL2,CDK1,CDKN1A,E2F1,PRC1,PRIM2	113 (11)
EIF2AK2		kinase	Activated	2.182	bias	0.0007	ATF3,CDKN1A,CXCL8,FOS,IFI27,IFNG,IL1B,LGALS3BP	114 (21)
3M-001		chemical drug	Activated	2.216	bias	0.000709	CCL4,CD86,CXCL8,IFNG,IL1B	62 (7)
RNASE2		enzyme		1.387	bias	0.000709	CCL4,CD300A,CD86,IL2RA,OSM	80 (11)
CAMK4		kinase		1.277	bias	0.000709	ATF3,CD40LG,CDKN1A,FOS,IFNG	133 (21)
ELF4		transcription regulator	Activated	2.176	bias	0.000709	CCR7,CDKN1A,CXCL8,PRF1,SPP1
PRKCA		kinase	Activated	2.669	bias	0.000723	APOBEC3G,CDKN1A,CYBB,FN1,FOS,IFNG,PLD1,S100A8,S100A9	105 (19)
WWTR1		transcription regulator		-0.243	bias	0.000745	CDKN1A,CXCL8,FN1,IL1B,SPP1,TK1
PTPRJ		phosphatase		0.447	bias	0.000745	CCL4,CD69,FCER1G,FOS,LTA,PLAUR	84 (16)
FOSL2		transcription regulator		1.839	bias	0.000745	CCR2,CXCL8,HPGD,SPP1,TIMP1,TK1	119 (17)
EBI3		cytokine		1.147	bias	0.000745	CD86,FOS,IFNG,IL12RB2,LAG3,RORC	92 (17)
RELB		transcription regulator		1.45	bias	0.000746	CDKN1A,CXCL8,IFNG,IL1B,LTA,MAP3K8,TRAF3	88 (15)
progesterone		chemical - endogenous mammalian		0.397		0.000763	AMD1,ATF3,CCNB2,CCR2,CD86,CDKN1A,CTSF,CXCL8,CXCR4,CYRIA,E2F1,EPAS1,FN1,FOS,IFNG,KRT5,LGALS1,NCAPH,NET1,PHF21A,PIP5K1A,RAB11FIP5,SPP1,TGFBI,TIMP1,TK1	115 (17)
MAPK13		kinase		1.965		0.000781	CDKN1A,FOS,IL1B,MAP3K8	153 (23)
RPS6KA5		kinase				0.000781	CCR7,FOS,IL1B,IL2RA	102 (16)
TLR6		transmembrane receptor		1.987	bias	0.000781	ATF3,CXCL8,IFNG,IL1B	79 (17)
apicidin		chemical - endogenous non-mammalian		0.334		0.000781	CDKN1A,CXCL8,IFNG,SLC35D1	118 (18)
MYB		transcription regulator		1.004	bias	0.00079	ADAM12,C15orf48,CD14,CDK1,CXCR4,FN1,IL2RA,IL7R,ITPR1,SLC27A2,SPP1	103 (17)
DAB2IP		other				0.000791	CDKN1A,CLU,EPAS1	92 (15)
NCR1		transmembrane receptor				0.000791	CCL4,CD69,IFNG	98 (20)
CXCL16		cytokine				0.000791	CXCL8,FN1,IFNG	105 (15)
CTH		enzyme				0.000791	CDKN1A,IFNG,IL1B	97 (18)
CTTN		other				0.000791	CCR2,IFNG,IL1B	97 (16)
pubchem compound 11368987		chemical reagent				0.000791	IFNG,IL1B,RORC	104 (13)
NF 449		chemical reagent				0.000791	CCL4,GZMB,PRF1
Pdgf (complex)		complex	Activated	2.724	bias	0.0008	CDKN1A,FN1,FOS,ODC1,PIK3R3,PLAUR,SV2A,TIMP1	123 (17)
CEBPD		transcription regulator		1.501	bias	0.0008	CCNB2,CD14,CDKN1A,CLU,CXCL8,CXCR4,FOS,IL1B	104 (17)
PDGF BB		complex	Activated	2.771	bias	0.0008	ATF3,CDK1,CDKN1A,CXCL8,FN1,FOS,GEM,IL1B,ODC1,PDGFRB,RFC5,RGS2,RHOB,SYK,TIMP1,TRIB1	96 (17)
TSLP		cytokine		1.103	bias	0.000803	CCR7,CD86,CXCL8,IL2RA,TIMP1	101 (16)
SERPINE1		other		-1	bias	0.000803	CXCL8,FN1,FOS,IFNG,PLAUR	109 (18)
FGFR3		kinase				0.000803	CCL4,CDKN1A,FOS,SPP1,ZNF589	105 (20)
TLR5		transmembrane receptor		1.951	bias	0.000803	ATF3,CCL4,CD86,CXCL8,IL1B	88 (13)
26s Proteasome		complex		-0.352	bias	0.000804	ATG4A,BAG3,CDK1,CDKN1A,CTSF,CXCL8,EXO1,HMGB2,KIF23,TK1	132 (19)
C5		cytokine		1.25	bias	0.000811	ATF3,CCL4,CD59,CD86,CXCL8,CYBB,FN1,IFNG,IL1B	85 (15)
SB-431542		chemical reagent		-0.718		0.000811	CCR2,CD14,CD69,DHCR24,FN1,FOS,IFNG,IL1RAP,SPP1	140 (22)
MSC		transcription regulator		0	bias	0.000819	CCL4,GPAT3,IFI27,SPP1,STS,TRIB1
LGALS3		other		1.688		0.000853	CCNB2,CCR2,CDKN1A,CTSF,FN1,IFNG,IL1B,SPP1	96 (19)
MDM2		transcription regulator		-0.367		0.00087	ATF3,CDKN1A,CXCL8,E2F1,IL1RN,KAT2B,TIMP1	144 (20)
rottlerin		chemical toxicant	Inhibited	-2.471	bias	0.00087	APOBEC3G,CDK1,CDKN1A,CXCL8,IFNG,PLD1,RGS2	104 (17)
POU2AF1		transcription regulator		-0.391	bias	0.000899	CD69,CD86,LGALS1,MS4A6A,SPP1,TRAF3	93 (9)
IFNA1/IFNA13		cytokine		1.709	bias	0.000899	CD69,CD86,GEM,IFI27,IFNG,IL1B	82 (16)
CpG ODN 1668		chemical reagent	Activated	2.183	bias	0.000899	CCL4,CD69,CD86,CXCL8,IFNG,IL1B	88 (15)
INPP5D		phosphatase	Inhibited	-2.207	bias	0.000907	CD69,CD86,CXCL8,IFNG,IL2RA	87 (17)
sorafenib		chemical drug	Inhibited	-2.171	bias	0.000907	CD69,CXCL8,IFNG,IL1B,IL2RA	101 (18)
pristane		chemical toxicant				0.000907	CD86,FN1,IL1B,IRF5,IRF8	76 (10)
ethionine		chemical toxicant		1.109	bias	0.000907	CD14,CLU,GTPBP4,SPP1,TIMP1
E2F1	8.274	transcription regulator	Activated	2.76	bias	0.000929	CCNB2,CDK1,CDKN1A,E2F1,ECT2,EXOSC9,FBXO5,FOS,GINS1,HMGB2,IFNG,KIF23,MCM10,MTBP,NDC80,NRIP1,PRIM2,RFC5,TK1,TRAF3,UMPS	147 (17)
zidovudine		chemical drug				0.000931	CDKN1A,CXCL8,IFNG,IL1B	66 (10)
Pde4		group		0.152		0.000931	CD14,CDKN1A,FN1,IL2RA	96 (15)
IL2RA	5.366	transmembrane receptor		0.832		0.000931	CD86,FOS,IFNG,PRF1	105 (15)
CNR2		G-protein coupled receptor				0.000931	CXCL8,FN1,IFNG,IL1B	91 (18)
JUNB		transcription regulator	Activated	2.765	bias	0.000934	ATF3,CLU,CXCR1,EPAS1,FN1,HPGD,IL1B,PLAUR,SWAP70,TIMP1	133 (18)
CCND1		transcription regulator		0.946		0.000937	CDKN1A,CENPN,DHCR24,E2F1,ENO1,HJURP,MCM10,MTFR2,NCAPH,PRIM2,RFC5,RGS2,SPP1,TPX2,TRIP13,ZFP28	137 (13)
ciglitazone		chemical drug		-0.834		0.000938	CD40LG,CDKN1A,CXCL8,CYBB,FN1,IFNG,SLC9A1	88 (17)
epinephrine		chemical - endogenous mammalian		0.775	bias	0.000938	CCR7,CDK1,CDKN1A,CXCL8,CXCR4,IFNG,PRIM2	104 (16)
delta-9-tetrahydrocannabinol		chemical drug		0.074		0.000938	CD69,CXCR4,FOS,IFNG,IL12RB2,IL1B,LTA	95 (18)
PTK2		kinase		0.577	bias	0.000984	CDKN1A,FN1,FOS,PDGFRB,SPP1,TIMP1	121 (16)
FN1	6.869	enzyme		1.669	bias	0.000996	CCL4,CDKN1A,CXCL8,DHCR24,FN1,FOS,IFNG,IL1B,PLAUR,SLC9A1,SPP1,UBE4B	94 (19)
FCER1G	5.452	transmembrane receptor		1.969	bias	0.00102	CCL4,CD69,CXCL8,IL1B,IL1RN	101 (18)
carbamylcholine		chemical drug		1.273	bias	0.00102	CDKN1A,FOS,GEM,ITPR1,RGS2	124 (20)
propofol		chemical drug		-1.387	bias	0.00102	CD14,CYBB,FOS,IL1B,NET1	100 (15)
arachidonic acid		chemical - endogenous mammalian		0.965		0.00103	CD86,CLU,ELOVL6,FOS,IL1B,PLD1,RGS2,SPP1	97 (16)
miR-208a-3p (and other miRNAs w/seed UAAGACG)		mature microRNA				0.00107	CD14,CD40LG,SPP1
ENTPD1		enzyme				0.00107	CD86,CXCL8,IFNG	96 (16)
STAT2		transcription regulator		1.067	bias	0.00108	CD86,CXCL8,IFI27,IFNG,IRF5,WARS1	66 (11)
NFKB2		transcription regulator		1.309	bias	0.00109	CCR7,CD86,CDKN1A,CXCL8,CXCR4,FOS,LTA	98 (16)
MTPN		transcription regulator	Activated	2.621	bias	0.00109	CCNB2,CDK1,FN1,FOS,IFNG,S100A8,SPP1	66 (8)
NFAT (complex)		complex				0.0011	ATF3,CD40LG,CD86,SPP1
IL36B		cytokine				0.0011	CD86,CXCL8,IFNG,IL1B	86 (13)
UCN		other		0.364		0.0011	FOS,HPGD,IFNG,IL1B	134 (19)
Cdkn1c		other				0.0011	CDKN1A,CXCR4,E2F1,MAL	73 (3)
beryllium sulfate		chemical toxicant				0.00112	CDKN1A,IFNG	124 (12)
cyanovirin-N		biologic drug				0.00112	CD69,IL2RA
RPS6KA		group				0.00112	CXCL8,FN1
methylamphotericin B		chemical drug				0.00112	SPP1,TIMP1
TH17 Cytokine		group				0.00112	CXCL8,LGALS1
DAPK1		kinase				0.00112	CXCL8,IL1B	120 (18)
ELL		transcription regulator				0.00112	CDKN1A,FOS	137 (13)
COL3A1		other				0.00112	FN1,IL1RN
TRD		other				0.00112	FCER1G,IFNG
riociguat		chemical drug				0.00112	SPP1,TIMP1	68 (7)
IL36RN		cytokine				0.00112	CXCL8,IL1B
ELOA		transcription regulator				0.00112	ATF3,CDKN1A
RACGAP1		transporter				0.00112	CD14,CDKN1A
nordihydrocapsiate		chemical reagent				0.00112	CD69,IL2RA
prinaberel		chemical drug				0.00112	IFNG,IL1B
dephostatin		chemical reagent				0.00112	CDKN1A,IL2RA	85 (12)
natamycin		chemical drug				0.00112	SPP1,TIMP1
N-methylsulfonyl-12,12-dibromododec-11-enamide		chemical reagent				0.00112	FN1,S100A8
Ac-YVAD-CMK		chemical - protease inhibitor				0.00112	IFNG,IL1B	68 (10)
glyphosate		chemical toxicant				0.00112	ITPR1,S100A9
RORC	6.057	ligand-dependent nuclear receptor		1.091	bias	0.00113	DHCR24,ELOVL6,HPGD,IFNG,IL1B,IL2RA,IL4I1,RORC,S100A8,S100A9	76 (7)
conjugated linoleic acid		chemical drug		-1.387		0.00114	CXCL8,CXCR4,FOS,IFNG,IL1RN	91 (13)
laminaran		chemical drug		1.342	bias	0.00114	CCL4,CXCL8,IL1B,IL2RA,IL7R	60 (7)
CG		complex	Activated	2.515	bias	0.00116	CDKN1A,CLU,CXCL8,CXCR4,EPAS1,FOS,HPGD,IFNG,IL1B,LGALS3BP,MCM10,NRIP1,PLAUR,RGS2,RNF130,SPP1,TIMP1	133 (15)
apigenin		chemical - endogenous non-mammalian		-1.308	bias	0.00117	CCL4,CDK1,CDKN1A,CXCL8,FOS,IL1B,LTA	130 (22)
mitomycin C		chemical drug		1.72	bias	0.00117	ATF3,CCNB2,CDKN1A,CXCL8,MALAT1,PARP2	117 (11)
Sb202190		chemical - kinase inhibitor	Inhibited	-2.128	bias	0.00119	CD86,CDKN1A,CXCL8,FN1,FOS,IFNG,IL1B,RHOB,S100A8	96 (15)
bortezomib		chemical drug		-0.004		0.00121	ATF3,BAG3,CCL4,CDKN1A,CXCL8,CXCR4,FANCC,FANCE,FANCG,IFNG,IL1B,IL2RA,ODC1	85 (15)
TP73		transcription regulator		-0.157		0.00121	ATF3,ATG4A,CDK1,CDKN1A,DRAM1,FN1,IL1B,IRF5,KIF23,MIR22HG,PDGFRB,PERP,PIK3R3,SERPINB6,SPP1,TIMP1,TPX2,WARS2	144 (22)
butyric acid		chemical - endogenous mammalian		0.519		0.00124	CCNB2,CD86,CDK1,CDKN1A,CETN2,CLU,CXCL8,CXCR4,DHCR24,E2F1,FOS,HDAC9,HMGB2,IL1B,SPP1,SYK,TGFBI,TIMP1,TXK	156 (19)
potassium chloride		chemical drug		-0.212	bias	0.00124	ATF3,CDK1,E2F1,FOS,IL1B,ODC1,SLC9A1,SPP1	114 (21)
MYOD1		transcription regulator				0.00125	CCNB2,CDK1,CDKN1A,HJURP,KIF14,KIF18B,NCAPH,NDC80,PBK,RRAS,SHCBP1,TPX2,TRIP13	129 (13)
SPIB		transcription regulator		1.134	bias	0.00125	ATF3,CCR2,CD86,GEM,IL2RA,NET1,ZC3H13
MEF2C		transcription regulator		1.633	bias	0.00126	ATF3,BACH2,CCL4,CCR2,CDKN1A,CXCR4,FOS,HDAC9,SYK	46 (5)
pirinixic acid		chemical toxicant		1.742	bias	0.00127	CDK1,CDKN1A,CLU,CXCL8,ELOVL6,FCER1G,GOT1,IFNG,IL1B,IL1RN,IRF8,MAP3K8,NPC2,PCM1,PERP,PIK3R3,PXMP4,SLC22A5,SLC27A2	118 (17)
ADORA2B		G-protein coupled receptor		0.447		0.00128	CD86,CXCL8,IL1B,SPP1,TIMP1	88 (16)
CCR5		G-protein coupled receptor				0.00128	CCL4,CD40LG,FOS,IFNG,IL1B	81 (16)
eflornithine		chemical drug		0.678		0.00128	CDK1,CDKN1A,FN1,LGALS3BP,ODC1	165 (19)
calcipotriene		chemical drug		1.214	bias	0.00129	CXCL8,FOS,IL1B,SPP1	126 (17)
BTRC		enzyme		0.591		0.00129	BST2,CDKN1A,CXCL8,IL1B	123 (24)
hemocyanin		biologic drug				0.00129	CD14,CD86,IFNG,TNFRSF4	89 (12)
UCN-01		chemical drug				0.00129	CDKN1A,CXCL8,IL1B,RHOB	129 (19)
GABA		chemical - endogenous mammalian		-0.762		0.00129	FN1,FOS,IFNG,IL1B	103 (18)
vorinostat		chemical drug		0.048		0.00133	CCR2,CD69,CDK1,CDKN1A,CLU,CXCL8,HPGD,IFNG,IL1B,LTA,OSM,RGS2,S100A8,S100A9	134 (18)
PP2/AG1879 tyrosine kinase inhibitor		chemical - kinase inhibitor		-1.94	bias	0.00134	CDKN1A,CXCL8,FN1,FOS,IL1B,IL2RA,SPP1	91 (17)
ITK		kinase		1.83	bias	0.00134	ARL4D,CCR8,CXCL8,FCER1G,FOS,IFNG,STYK1	101 (17)
HMGB1		transcription regulator	Activated	2.044	bias	0.00134	CCL4,CD86,CDKN1A,CXCL8,IFNG,IL1B,IRF5	83 (16)
Lh		complex		1		0.00134	CTNND1,CXCL8,CXCR4,FOS,GEM,GNLY,ITPR1,NPC2,P4HA2,PGK1,RHOB,TK1,TRIB1	160 (18)
BACH2	-5.38	transcription regulator		-1.671	bias	0.00139	IFNG,IL12RB2,RORC,S100A8,S100A9,TNFRSF4	67 (7)
RRP1B		transcription regulator				0.00139	CCNB2,CDK1,CDKN1A,EXO1,FANCB,HSP90AB1,PERP,SPP1
beraprost		chemical drug				0.00141	CD86,FN1,IL1B
highly active antiretroviral therapy		chemical drug				0.00141	CXCR4,IL2RA,IL7R	101 (14)
PELI1		enzyme				0.00141	CXCL8,IFNG,IL1B	94 (21)
GADD45G		other				0.00141	CDKN1A,FOS,IFNG	105 (18)
CST3		other				0.00141	FOS,IL1B,IRF8	69 (7)
NTS		other				0.00141	CXCL8,FOS,IL1B	95 (18)
HLA-G		other				0.00141	CCR2,CXCR4,IFNG	107 (13)
ELN		other				0.00141	CD86,FN1,IL1B	105 (21)
IL16		cytokine				0.00141	FOS,IFNG,IL2RA	93 (15)
pentylenetetrazol		chemical drug				0.00141	FOS,IL1B,TIMP1	106 (10)
IFNE		cytokine	Activated	2.2	bias	0.00142	APOBEC3G,BST2,CD86,CDKN1A,IFNG	86 (16)
S100A4		other				0.00142	CDKN1A,FN1,S100A8,S100A9,TIMP1	97 (18)
DPP4		peptidase		0.651	bias	0.00142	CD86,IFNG,IL1B,IL1RN,TIMP1	86 (18)
verapamil		chemical drug		-1.387	bias	0.00142	CD59,ENO1,FOS,IFNG,IL1B	123 (19)
retinoid		chemical drug		0.756		0.00142	CDKN1A,E2F1,IFNG,TGFBI,TRAF3	140 (19)
histamine		chemical - endogenous mammalian		1.863	bias	0.00144	CCL4,CD86,CXCL8,CXCR4,FOS,IFNG,IL1B	102 (18)
CASR		G-protein coupled receptor	Activated	3	bias	0.00146	LGALS1,NDC1,ODC1,PRC1,S100A8,S100A9,SERPINB6,TK1,TPX2	86 (7)
MST1		growth factor		0.152	bias	0.0015	FOS,IL1RN,IRF8,SPP1	127 (16)
PYCARD		transcription regulator				0.0015	CDKN1A,CXCL8,IFNG,IL1B	128 (21)
KN-62		chemical - kinase inhibitor		-1.982	bias	0.0015	ATF3,CD40LG,CXCL8,IL1B	98 (17)
arotinoid acid		chemical toxicant		0.254	bias	0.0015	CDKN1A,FOS,ODC1,TK1	118 (18)
curdlan		chemical - endogenous non-mammalian		1.172		0.0015	CD69,CXCL8,FOS,IL1B	83 (15)
GPS2		transcription regulator		-1.471	bias	0.00151	CCL4,CD14,CDKN1A,CXCL8,LTA,RHOB	136 (24)
NFYA		transcription regulator				0.00154	CCNB2,CDK1,CDKN1A,E2F1,PDGFRB,PGK1,RHOB
bisindolylmaleimide I		chemical - kinase inhibitor	Inhibited	-2.809	bias	0.00156	CDKN1A,CLU,CXCL8,E2F1,FN1,FOS,HSP90AB1,PLD1	121 (17)
CYP27B1		enzyme		-0.152	bias	0.00158	CCL4,CCR8,CD14,IFNG,SPP1	110 (15)
TNC		other				0.00158	CCL4,CDKN1A,FOS,IFNG,IL1B	97 (18)
ELANE		peptidase		1.506	bias	0.00158	CD14,CXCL8,FOS,IL1B,OSM	132 (16)
NOX4		enzyme		1.528	bias	0.00158	CDKN1A,CXCL8,CYBB,EPAS1,FN1	92 (15)
sirolimus		chemical drug	Inhibited	-3.398	bias	0.00161	CCNB2,CCR7,CD86,CDK1,CDKN1A,CREG1,CXCR4,E2F1,ENO1,ERCC8,FN1,FOS,HSP90AB1,IFNG,IL1B,IL2RA,ODC1,PDGFRB,PGK1,PLAUR,RORC,TIMP1	104 (17)
mibolerone		chemical drug		1	bias	0.00162	AMD1,CCNL2,CDK1,CLU,MAL,PGK1,SLC22A5,TGFBI,TK1
LDB1		transcription regulator		-1.604		0.00162	ALDH1B1,BCL9,CCR2,CDKN1A,FNDC3B,IFNG,IL1RAP,IL2RA,JARID2,LGALS1,MAP3K8,RAB11FIP4,RIPK2,SLC43A1
tributyrin		chemical drug	Activated	2.433	bias	0.00164	ATF3,CDKN1A,CXCL8,CXCR4,IL1B,STYK1	88 (7)
BCL2L1		other		-0.447		0.00164	CXCL8,FN1,IL1B,ITPR1,LTA,TIMP1	91 (15)
PDCD1		phosphatase	Inhibited	-2.2	bias	0.00164	CD86,CXCL8,GNLY,GZMB,IFNG,IL2RA	106 (17)
25-hydroxycholesterol		chemical reagent		0.816		0.00164	ATF3,CXCL8,FOS,IL1B,PIK3R3,SV2A	121 (17)
FADD		other		-0.218	bias	0.00164	CDK1,CDKN1A,CXCL8,CXCR4,FOS,IRF5,RIPK1	102 (17)
LMO2		transcription regulator		-1.604		0.00168	ALDH1B1,BCL9,CCR2,CDKN1A,FNDC3B,IFNG,IL1RAP,IL2RA,JARID2,LGALS1,MAP3K8,RAB11FIP4,RIPK2,SLC43A1
ITGB1		transmembrane receptor		1.936		0.0017	CDKN1A,CXCL8,FN1,FOS,IFNG,IL1B,IL1RN,PLAUR,RORC	95 (17)
dihydrotestosterone		chemical - endogenous mammalian	Activated	2.981	bias	0.00171	AIG1,AMD1,CDKN1A,CLU,CYBB,DHCR24,ENO1,FAM111B,FN1,FOS,HPGD,KRT5,LGALS1,MCM10,ODC1,PHF21A,PRIM2,RHOB,SERPINB6,SLC25A40,SLCO3A1,SPP1,TRIP13	142 (23)
let-7		microRNA	Inhibited	-2.884	bias	0.00171	ALDH1B1,CCR7,CDK1,FN1,MCM10,NUF2,PLAUR,RFC5,STYK1,TAB2,TARBP2,TRIB1	75 (7)
estrogen		chemical drug	Activated	2.191	bias	0.00173	ALDH1B1,CCNB2,CDKN1A,CLU,CYBB,E2F1,EPAS1,FN1,FOS,IFNG,IL1B,LGALS1,NRIP1,SPP1	96 (19)
vemurafenib		chemical drug		0.283	bias	0.00173	CXCL8,GZMB,IL1B,PRF1	140 (21)
MALT1		peptidase				0.00173	IL1B,IL2RA,RORC,TRAF3	96 (18)
CTSB		peptidase		1.181	bias	0.00173	CYBB,E2F1,IL1B,PLAUR	125 (19)
NFKBIZ		transcription regulator		1.963	bias	0.00173	CXCL8,IFNG,S100A8,S100A9	111 (18)
ECSIT		transcription regulator		1.929	bias	0.00173	CXCL8,IL1B,IL1RN,PLAUR	113 (15)
Mt1		other		-1.981	bias	0.00173	ATF3,FOS,IL1B,RORC	103 (13)
lipid A		chemical toxicant	Activated	2.2	bias	0.00175	CD14,CD86,CXCL8,IL1B,SYK	77 (17)
RAC2		enzyme				0.00175	CCL4,FOS,IFNG,IL1B,LTA	88 (16)
Ro31-8220		chemical - kinase inhibitor	Inhibited	-2.144	bias	0.00175	CDKN1A,CXCL8,FN1,IL1B,PLD1	101 (20)
TSH		complex	Activated	2.213	bias	0.00177	ARRB1,CDKN1A,CXCL8,FOS,IL1RN,KRT5	112 (19)
EGLN1		enzyme		-1.041		0.00177	CD86,CXCR4,EPAS1,IFNG,IL1B,PGK1	88 (14)
CD3E		transmembrane receptor				0.00177	CD69,FOS,IFNG,IL2RA,LTA,MAP3K8	101 (17)
Salmonella enterica serotype abortus equi lipopolysaccharide		chemical toxicant		1.993	bias	0.00179	CCL4,CCR7,CDK1,GEM,IL1B,IL2RA,IL7R,MAP3K8,PLD1,RIPK2	113 (15)
desoxycorticosterone		chemical - endogenous mammalian				0.00181	CYBB,FOS,SPP1	100 (16)
trypsin		group				0.00181	CDKN1A,CXCL8,FOS	93 (17)
TRIM38		other				0.00181	CXCL8,IL1B,TAB2	82 (16)
PIM3		kinase				0.00181	IFNG,IL12RB2,IL1B
PTGER1		G-protein coupled receptor				0.00181	CXCL8,FN1,FOS	144 (18)
OPRM1		G-protein coupled receptor				0.00181	GZMB,IFNG,PRF1	96 (15)
CCL3L3		cytokine				0.00181	CCL4,IFNG,IL1B	70 (10)
RHOA		enzyme		1.579	bias	0.00187	CDKN1A,CXCL8,ECT2,FN1,FOS,IL1B,RHOB	107 (19)
sunitinib		chemical drug		-1.455	bias	0.00191	CD69,CDKN1A,FN1,IFNG,IL2RA,TGFBI	86 (15)
TLR8		transmembrane receptor		1.292	bias	0.00193	CCL4,CCR7,CD86,CXCL8,IL1B	83 (18)
hexamethylene bisacetamide		chemical reagent		1.387		0.00193	CDKN1A,CREG1,CXCL8,FN1,IFNG	20 (3)
stallimycin		biologic drug		1.387	bias	0.00193	CXCL8,IFI27,IFNG,IL1B,IL7R	65 (11)
metronidazole		chemical drug		-0.707		0.00196	CD69,FOS,IFNG,LAG3,LGALS1,NRIP1,SLCO4A1,SPP1	72 (7)
mir-223		microRNA		0.361		0.00197	C15orf48,E2F1,IL1B,IL1RN,MCTP2,NFIA,RIPK1,S100A9,TGFBI
miR-124-3p (and other miRNAs w/seed AAGGCAC)		mature microRNA	Inhibited	-3.464	bias	0.00198	ARFIP1,CD59,CTNND1,DHCR24,DRAM1,GTPBP8,NAA15,SERPINB6,SLC17A5,SLC22A5,SMAD5,SWAP70
R5020		chemical reagent	Activated	2.2	bias	0.00199	CDKN1A,E2F1,LGALS3BP,NET1,RASD1,RGS2,TK1	162 (23)
sodium selenite		chemical drug				0.00199	HPGD,IFNG,IL1B,SEPHS2	81 (10)
MALP-2s		chemical reagent		1.964	bias	0.00199	CCL4,CD86,IFNG,IL1B	87 (16)
hydrochloric acid		chemical - endogenous mammalian		1.982	bias	0.00199	CCL4,CXCL8,FOS,IL1B	113 (19)
RAC1		enzyme	Activated	2.611	bias	0.00206	ATF3,CD86,CXCL8,FN1,FOS,IFNG,IL1B,PLAUR	116 (17)
TNFSF13B		cytokine		1.951	bias	0.00207	CCL4,CCR7,CD40LG,CD86,CXCL8,SPP1	105 (17)
calphostin C		chemical - kinase inhibitor		-1.793	bias	0.00207	APOBEC3G,CDKN1A,CLU,CXCL8,FOS,S100A8	96 (19)
C3AR1		G-protein coupled receptor		0.557	bias	0.00213	CCL4,CD86,CXCL8,IFNG,IL1B	93 (14)
ACOX1		enzyme		0		0.00217	AIG1,CDKN1A,CPOX,GOT1,IL1RAP,LGALS3BP,QPCT,RGS2,SLC27A2
adenine		chemical - endogenous mammalian				0.0022	CXCL8,IL1B	87 (7)
TEC/BTK/ITK/TXK/BMX		group				0.0022	CD69,IL2RA	76 (14)
PIEZO1		ion channel				0.0022	CD69,IL2RA
CCDC134		other				0.0022	IFNG,PRF1
CRTAM		other				0.0022	IFNG,PRF1
B3GNT2		enzyme				0.0022	CD14,IL1B
tetrahydrocurcumin		chemical - endogenous mammalian				0.0022	CDKN1A,IL1B	75 (7)
P-TEFb		complex				0.0022	CDKN1A,CXCL8	73 (3)
Tcrb-V3		group				0.0022	CD69,IL2RA
ZNF467		transcription regulator				0.0022	FOS,OSM
RAB11FIP3		other				0.0022	FOS,IFNG	64 (7)
miR-27a-5p (miRNAs w/seed GGGCUUA)		mature microRNA				0.0022	GZMB,PRF1
miR-331-3p (miRNAs w/seed CCCCUGG)		mature microRNA				0.0022	KIF23,PLAUR
CALCR		G-protein coupled receptor				0.0022	CDKN1A,FOS	83 (12)
PDE4A		enzyme				0.0022	FN1,IFNG	82 (12)
TPP2		peptidase				0.0022	IFNG,PRF1
MEP1A		peptidase				0.0022	CXCL8,IL1B
CRLF1		other				0.0022	CD69,IFNG
NBN		other				0.0022	CDKN1A,CLU
CAY10397		chemical reagent				0.0022	IFNG,IL1B
VR23		chemical reagent				0.0022	CXCL8,IL1B
p38 MAP kinase inhibitor		chemical drug				0.0022	CDKN1A,IFNG
ITF3056		chemical reagent				0.0022	IFNG,IL1B
methylamine		chemical - endogenous mammalian				0.0022	FN1,IL1B	74 (7)
carboxyamido-triazole		chemical drug				0.0022	BAG3,FOS
tirapazamine		chemical drug				0.0022	CDKN1A,SPP1
tipifarnib		chemical drug				0.0022	CDKN1A,IFNG	88 (15)
ascomycin		chemical reagent				0.0022	CD86,CXCL8
lansoprazole		chemical drug				0.0022	CD14,CXCL8
docosahexaenoic acid		chemical drug		-1.422	bias	0.00222	CCL4,CD86,CDKN1A,CXCL8,CXCR4,ELOVL6,FOS,HPGD,IL1B,TIMP1	94 (18)
mir-15		microRNA		1.154	bias	0.00223	CD69,IFNG,IL1B,PLAUR,TARBP2,TIMP1	120 (15)
CRH		cytokine		1.585	bias	0.00223	CXCL8,FOS,HPGD,IL1B,IL1RN,IL2RA	111 (17)
ZBTB7B		transcription regulator		-0.243	bias	0.00223	IFNG,IL2RA,PRF1,RORC,SLC27A2,TNFRSF4
SOCS3		phosphatase		-1.015	bias	0.00226	ATF3,CD86,CDKN1A,FOS,IFNG,IL1B,IL1RN	95 (15)
N(2)-(gamma-D-glutamyl)-meso-2,2'-diaminopimelic acid		chemical reagent				0.00226	CCL4,CXCL8,IL1B	80 (11)
Collagen Alpha1		group				0.00226	CDKN1A,IL1RN,PLAUR	100 (18)
SCAVENGER receptor CLASS A		group				0.00226	CD86,CXCL8,IFNG	93 (14)
TAC4		other				0.00226	CD86,IFNG,IL1B	125 (18)
PLCE1		enzyme				0.00226	CCR2,CXCL8,IFNG	96 (15)
FCER2		transmembrane receptor				0.00226	CCL4,CXCL8,IL2RA	78 (14)
BMX		kinase				0.00226	CXCL8,FOS,TIMP1	88 (15)
MVP		other				0.00226	CD86,CXCL8,IL1B	136 (20)
ST14		peptidase				0.00226	CXCL8,IFNG,IL1B	110 (19)
N-(3-oxododecanoyl)-homoserine lactone		chemical reagent				0.00226	CXCL8,IFNG,IL1B	114 (17)
picryl chloride		chemical toxicant				0.00226	IFNG,IL1B,SPP1
spermine		chemical - endogenous mammalian				0.00226	CCL4,IL1B,ODC1	97 (17)
buthionine sulfoximine		chemical drug				0.00226	CCR2,CXCR4,FOS	102 (17)
growth factor		group				0.00226	CLU,FOS,IL7R	123 (18)
lovastatin		chemical drug		1.725	bias	0.00227	ATF3,CD86,CDKN1A,IFNG,IL1B,MAL,PIK3R3,RHOB,SV2A	114 (16)
SND1		enzyme				0.00228	APOBEC3G,E2F1,QPCT,SLCO4A1
PHB		transcription regulator				0.00228	CXCL8,E2F1,IFNG,IL1B	127 (18)
dicarbethoxydihydrocollidine		chemical toxicant				0.00228	CCNB2,CDK1,IL1B,SPP1
Creb		group		0.664	bias	0.00229	ATF3,CD14,CD59,CDKN1A,CXCL8,FCER1G,FOS,HPGD,IFNG,IL1B,KPTN,MALAT1,PGK1,RGS2,RIPK1	84 (15)
ITGB2		transmembrane receptor	Activated	2.213		0.00234	CCL4,CD69,CD86,FN1,IFNG	118 (16)
FYN		kinase		1.4	bias	0.00234	CCL4,FOS,IFNG,IL1B,RORC	124 (23)
omeprazole		chemical drug				0.00234	CDKN1A,CXCR4,EPAS1,FOS,SYK
zVAD-FMK		chemical - protease inhibitor		-1		0.00234	CDKN1A,FOS,IL1B,IL2RA,RIPK1	119 (19)
K+		chemical - endogenous mammalian		0.468	bias	0.00234	ATF3,E2F1,FOS,IL1B,ITPR1	132 (20)
cholesterol		chemical - endogenous mammalian	Activated	2.615	bias	0.00236	ATF3,C15orf48,CCL4,CCR2,CD14,CXCL8,CYBB,FN1,IL1B,IL1RN,S100A8,TIMP1	98 (15)
IRF3		transcription regulator		1.769	bias	0.00243	CCL4,CD69,CD86,CXCL8,FN1,IFI27,IFNG,IL1B,IRF5,LAG3,TNFRSF4	100 (18)
IL17A		cytokine	Activated	3.288	bias	0.00247	C15orf48,CCL4,CD14,CXCL8,CXCR4,FOS,IFNG,IL1B,IL1RN,ITPR1,S100A8,S100A9,TIMP1	135 (19)
TCF4		transcription regulator		0.492		0.00248	APOBEC3G,BACH2,C15orf39,CCNB2,CDK1,CDKN1A,FN1,FOS,GNE,HMGB2,IL4I1,NDC80,NUF2,PLAUR,PRC1,SPP1,WARS1	95 (11)
RET		kinase		1.724	bias	0.00249	AKAP9,CLU,CXCL8,CXCR4,FOS,IFNG,IL1B,PLAUR,S100A9	83 (16)
PPIF		enzyme		-1.134		0.00255	CCL4,CCR2,CCR8,CXCR4,IRF5,PIF1,SLCO4A1
salmonella minnesota R595 lipopolysaccharides		chemical - endogenous non-mammalian		1.941	bias	0.00255	CCL4,CCNL2,CD86,CXCL8,FOS,IFNG,IL1B,IRF8	93 (17)
ethanol		chemical - endogenous mammalian		1.947		0.00255	ATF3,CD14,CD40LG,CDKN1A,CLU,CXCL8,CXCR4,FOS,GZMB,HSP90AB1,IFNG,IL1B,IL1RN,LGALS1,PRF1,RHOB,TIMP1	114 (16)
SCARB1		transporter				0.00256	IFNG,IL1B,IL1RN,LTA,SPP1	91 (14)
IFIH1		enzyme		1.067	bias	0.00256	CCL4,CXCL8,IFI27,IL1B,PRF1	117 (20)
NFATC3		transcription regulator				0.00258	ATF3,CD40LG,CD69,FOS,IFNG,IL2RA	110 (11)
tosedostat		chemical drug	Activated	2	bias	0.00259	ATF3,CDKN1A,CXCL8,WARS1
FGFR4		kinase				0.00259	CDK1,CDKN1A,FOS,NRIP1	101 (17)
ZNF281		transcription regulator				0.00259	CCL4,CXCR4,FANCG,ODC1
suramin		chemical drug		1.015		0.00259	CD86,CXCL8,KRT5,ODC1	130 (18)
rifampin		chemical drug				0.0026	ABHD2,CD14,CD59,ECT2,IL1B,KIF14,NCAPH,NUF2,SPP1
NLRP3		other		0.936		0.0027	CCL4,CD69,FN1,IFNG,IL1B,PARP2,PRIM2	96 (18)
EHF		transcription regulator	Activated	2.449	bias	0.0027	CDK1,E2F1,IL1RN,PLAUR,S100A8,S100A9,TIMP1
EIF4E		translation regulator		1.673	bias	0.00272	CAPG,CDKN1A,CYBB,FN1,IFNG,KAT2B,LAG3,LGALS3BP,ODC1,PLAUR,TGFBI	97 (12)
cyclic GMP		chemical - endogenous mammalian				0.00279	CDKN1A,FOS,IL12RB2	92 (20)
ADP		chemical - endogenous mammalian				0.00279	CCL4,CXCL8,FOS	90 (16)
Nos		group				0.00279	CD59,FOS,TIMP1	82 (13)
mir-196		microRNA				0.00279	FOS,KRT5,S100A9
IL18R1		transmembrane receptor				0.00279	CD40LG,IFNG,IL1B	107 (17)
Hsp70		group		1.095		0.0028	CD14,CD86,CXCL8,GZMB,IL1B	101 (17)
BAPTA-AM		chemical reagent	Inhibited	-2.2	bias	0.0028	ATF3,CDKN1A,CXCL8,FN1,FOS	101 (20)
Ifn gamma		complex		1.698	bias	0.00286	APOBEC3G,CD86,CDKN1A,CXCL8,CYBB,IL1B,IRF8	94 (19)
GW9662		chemical reagent		0.416	bias	0.00286	CD14,CD86,CDKN1A,FN1,FOS,IFNG,RORC	117 (23)
ASPSCR1-TFE3		fusion gene/product	Activated	2.646	bias	0.00286	ABHD2,CD59,EPAS1,NPC2,P4HA2,SLC38A7,SLC9A1
caspase		group				0.00293	CD14,CDK1,CDKN1A,IL2RA	107 (21)
H2AZ1		other				0.00293	AGPAT2,CD69,CDKN1A,CXCR4
CLU	4.372	other				0.00293	CDK1,CDKN1A,CLU,CXCL8	138 (17)
WAS		other				0.00293	CD69,IFNG,IL1B,RORC	124 (18)
vinblastine		chemical drug		1.91	bias	0.00293	CD86,CDKN1A,FOS,IL1B	128 (18)
Calcineurin protein(s)		complex		0.773	bias	0.00296	CCL4,CXCL8,FOS,ITPR1,RGS2,SPP1	115 (20)
SP600125		chemical - kinase inhibitor	Inhibited	-2.784		0.003	ATF3,CCL4,CD86,CDK1,CDKN1A,CXCL8,FN1,FOS,IFNG,IL1B,IL2RA,P4HA2,PDGFRB,SPP1	122 (17)
allopurinol		chemical drug		0.378	bias	0.00303	CD14,CD69,CLU,GTPBP4,IL1B,SPP1,TIMP1	85 (15)
miR-146a-5p (and other miRNAs w/seed GAGAACU)		mature microRNA	Inhibited	-2.63	bias	0.00303	CXCL8,CXCR4,IL12RB2,IL1RAP,IRF5,MCM10,PRF1	83 (7)
PTEN		phosphatase		-1.376		0.00304	ATF3,CCNB2,CCR7,CD86,CDKN1A,CXCL8,CXCR4,E2F1,ELOVL6,EPAS1,ERCC8,FAM220A,FN1,FOS,IFNG,IL1B,MAL,PDGFRB,PERP,PGK1,SEPHS2,SLC35D1,SPP1,SYK,TMA16	145 (19)
TSC22D3		transcription regulator		-1.206		0.00306	CD86,CDKN1A,CXCL8,IL1B,IL2RA	88 (15)
ADRA1A		G-protein coupled receptor				0.00306	ADAM12,CDK1,FN1,FOS,PRIM2	108 (17)
IFNA4		cytokine		1.437	bias	0.00306	CD69,CD86,IFNG,MAP3K8,SLCO3A1	76 (9)
PRKD1		kinase		1.432	bias	0.00306	CCL4,CD86,IFNG,IL1B,IL2RA	120 (19)
tretinoin		chemical - endogenous mammalian	Activated	2.608	bias	0.00308	ABCE1,ABHD2,CCL4,CD14,CD86,CDKN1A,CREG1,CTNND1,CXCL8,CXCR4,CYBB,CYP2R1,FCER1G,FN1,FOS,HMCES,IFI27,IFNG,IL12RB2,IL1B,IL4I1,KAT2B,KIF23,KRT5,LGALS1,LGALS3BP,MAP3K8,MIR17HG,NPC2,NRIP1,ODC1,P4HA2,PDGFRB,PLAUR,PLD1,RORC,RTKN2,S100A8,S100A9,SLC27A2,SMAD5,SPP1,SRGN,TAB2,TAF4B,TGFBI,TIMP1,TK1	138 (20)
Z-LLL-CHO		chemical - protease inhibitor	Activated	2.246	bias	0.00312	ATF3,BST2,CDKN1A,CLU,CXCL8,EPAS1,FANCC,FOS,HMGB2,IFNG,IL1B,MCM10,ODC1,RIPK1,TIMP1	101 (15)
HNF4A		transcription regulator		0.037		0.00319	ABCE1,ACBD6,C9orf64,CDK1,CDKN1A,CETN2,CFAP20,CLCN6,CMSS1,CXCL8,DHRS7B,EXO1,FH,FIG4,FOXRED1,GOT1,GSTZ1,HMGB2,IFT122,IL1RAP,KPTN,LYRM4,MGME1,MPP1,NDC1,NDC80,NUF2,PERP,PIK3R3,PIP5K1A,PLD2,POLR1B,POLR3F,QRSL1,RBKS,RFC5,RORC,RTN4IP1,S100A9,SLC17A5,SLC25A40,SLC27A2,SLC35D1,SLC43A1,SPP1,TAOK3,TBC1D16,TIMM21,TMA16,TMEM187,TPX2,TRMT1L,UMPS,VIPAS39,WARS2,ZNF222,ZNF225,ZNF304,ZNF443,ZNF589
5-fluorouracil		chemical drug		1.036		0.00321	ATF3,CD86,CDK1,CDKN1A,CGRRF1,CLU,DRAM1,E2F1,HSP90AB1,IFNG,IL1B,PGK1,PRC1,RHOB,SERPINB6	149 (20)
lysophosphatidic acid		chemical - other	Activated	2.557	bias	0.00321	CCL4,CD14,CXCL8,FOS,IL1B,PDGFRB,PLAUR	117 (20)
CpG ODN 2006		chemical reagent	Activated	2.545	bias	0.00321	CD86,CXCL8,GZMB,IFI27,IFNG,IL1B,IL2RA	79 (17)
STAT5a/b		group		0.692		0.00327	CD69,CDKN1A,CLU,FCER1G,FOS,IFNG,IL2RA,OSM	125 (19)
Fc gamma receptor		group		-0.686	bias	0.00329	CD86,CDKN1A,CXCL8,IRF8	99 (18)
TRPM2		ion channel		0.882		0.00329	CXCL8,EPAS1,IFNG,IL1B	110 (19)
ITCH		enzyme	Inhibited	-2	bias	0.00329	CCNB2,FOS,IFNG,IL1B	99 (17)
ALDH1A2		enzyme		-1.982	bias	0.00329	ATF3,SPP1,TGFBI,TIMP1
UXT		transcription regulator		0	bias	0.00329	CXCL8,F5,HPGD,IL2RA
IRF6		transcription regulator		0.246	bias	0.00333	CD14,CD69,CD86,CXCL8,IL1B	88 (16)
Vegf		group	Activated	3.971	bias	0.00336	ATF3,CDK1,CXCL8,CXCR4,FANCG,FN1,GEM,IFNG,ITPR1,MAP3K8,MIR17HG,NDC80,PLAUR,PRC1,RGS2,SMAD5,TIMP1,TPX2,TRIB1,TRIP13	88 (13)
resatorvid		chemical drug				0.00339	CXCL8,IFNG,IL1B	103 (18)
C1q		complex				0.00339	CXCL8,IFNG,IRF5	103 (18)
SLAMF1		transmembrane receptor				0.00339	CXCL8,IFNG,IL12RB2	77 (18)
PFKFB3		kinase				0.00339	CDK1,EPAS1,IL1B	101 (15)
ZNF148		transcription regulator				0.00339	CDKN1A,FN1,ODC1
CSK		kinase				0.00339	FCER1G,FOS,IL1B	121 (20)
MEL T1		chemical - kinase inhibitor				0.00339	ENO1,FH,PGK1
MAML1		transcription regulator				0.00339	CXCL8,IL1B,IL7R	98 (14)
RHOB	4.534	enzyme				0.00339	CDKN1A,CXCL8,RHOB	117 (19)
4-nitroquinoline-1-oxide		chemical toxicant				0.00339	CCNB2,CDK1,CDKN1A	96 (7)
hydrogen sulfide		chemical - endogenous mammalian				0.00339	CD69,CXCL8,IL2RA	133 (18)
17-alpha-ethinylestradiol		chemical drug	Activated	2.157	bias	0.00339	CCR2,CCR7,CCR8,CDK1,CDKN1A,FOS,ODC1,PERP,PSEN2	125 (16)
SMAD7		transcription regulator		-0.567	bias	0.00339	CDK1,CDKN1A,FN1,HDAC9,IFNG,IL1B,NET1,TGFBI,TIMP1	122 (20)
corticosteroid		chemical drug				0.00339	CD69,CXCL8,GNLY,IFNG,IL1RN,SRGN	122 (15)
isotretinoin		biologic drug		0.928	bias	0.00339	CDKN1A,CXCL8,HPGD,IFNG,ODC1,S100A9	119 (21)
indomethacin		chemical drug		-0.166		0.00342	CD14,CD40LG,CDKN1A,CLU,CXCR4,FOS,GTPBP4,IL1B,PLAUR,S100A8,SPP1,TIMP1	121 (19)
SP3		transcription regulator				0.0035	ATF3,CDKN1A,E2F1,FOS,IL12RB2,ITGAD,PGK1,PLAUR,RRAS,TIMP1,TNFRSF4	157 (21)
15-deoxy-delta-12,14 -PGJ 2		chemical - endogenous mammalian		-1.057	bias	0.00359	CDKN1A,CXCL8,CYBB,E2F1,FN1,FOS,IFNG,IL1B,SLC9A1,SPP1	103 (19)
HMOX1		enzyme		-0.466		0.0036	CD14,CDKN1A,CXCL8,FOS,IFNG,IL1B,IL1RN,RORC	125 (22)
CD274		enzyme		-1.964	bias	0.00362	CD69,CD86,GZMB,IFNG,PRF1	96 (18)
ADM		other		0.744		0.00362	FN1,FOS,IL1B,PGK1,SPP1	104 (18)
PF4		cytokine	Activated	2.392	bias	0.00363	CCL4,CD86,CDKN1A,CXCL8,IFNG,IL1B	90 (18)
CF102		chemical drug				0.00363	CYBB,IFNG	79 (10)
eritoran		chemical drug				0.00363	CXCL8,IL1B	60 (7)
beta-glucan		chemical drug				0.00363	IL1B,IL1RN
asialo GM1 ganglioside		chemical - endogenous mammalian				0.00363	CXCL8,IFNG	69 (7)
[Lys15,Arg16,Leu27]VIP(1-7)GRF(8-27)		chemical reagent				0.00363	CD86,CXCL8
SPINDOC		other				0.00363	BST2,IL1B
RUBCN		other				0.00363	CCL4,IL1B
Tlr12		other				0.00363	CXCL8,IL1B	90 (14)
7S NGF		complex				0.00363	CLU,FOS
Mucin		group				0.00363	CD86,CXCL8
RAP1B		enzyme				0.00363	CCL4,IFNG	119 (17)
STX11		transporter				0.00363	IFNG,IL1B
GRAP2		other				0.00363	CD69,IL2RA	72 (7)
ADAR		enzyme				0.00363	ADAM12,FOS
RHOH		enzyme				0.00363	CDKN1A,IFNG	49 (8)
UTS2		other				0.00363	FOS,HPGD
PILRB		other				0.00363	IFNG,IL1B	72 (10)
ALDH3A1		enzyme				0.00363	CDKN1A,E2F1
CD59	3.838	other				0.00363	CD69,IL2RA	90 (17)
LAMP1		other				0.00363	IFNG,PRF1
SPIN1		other				0.00363	BST2,IL1B
KIR2DL4		transmembrane receptor				0.00363	CD69,IFNG
SMARCC2		transcription regulator				0.00363	IFNG,NPC2
PELI2		enzyme				0.00363	CXCL8,IL1B	89 (16)
DGKA		kinase				0.00363	CD69,IL1B	68 (7)
CP 96345		chemical drug				0.00363	CCL4,CXCL8
plevitrexed		chemical drug				0.00363	CDK1,CDKN1A
fenoldopam		chemical drug				0.00363	CYBB,PLD2
grepafloxacin		chemical drug				0.00363	CXCL8,IL1B	72 (7)
4-aminophenol		chemical - endogenous mammalian				0.00363	CLU,SPP1
PDPK1		kinase				0.00369	CCR7,CDKN1A,CXCL8,IL1B	111 (21)
VTN		other		-1	bias	0.00369	CDKN1A,IL1B,IRF8,PLAUR	99 (23)
TAB1		enzyme		-0.105	bias	0.00369	CDKN1A,CXCL8,IL1B,RGS2	106 (18)
isobutylmethylxanthine		chemical toxicant		0.64	bias	0.00375	CD14,CDKN1A,CXCR4,ELOVL6,FN1,FOS,IFNG,IL1B,PDGFRB,SYK,TIMP1	142 (23)
LIF		cytokine		1.977		0.00375	CDKN1A,CXCL8,E2F1,FN1,FOS,IFNG,IL1B,IL2RA,PLD1,SPP1,TIMP1	94 (16)
mir-21		microRNA	Inhibited	-2.013	bias	0.00381	CDKN1A,CLU,ECT2,FN1,IFNG,IL12RB2,IL1B,KIF23,PBK,PRC1,RHOB,SMAD5,TMEM97	131 (19)
FOSL1		transcription regulator		-0.391		0.00387	CCL4,CXCL8,FOS,HPGD,IL1B,PLAUR	117 (16)
IRF1		transcription regulator	Activated	2.587	bias	0.00387	CDKN1A,CXCL8,CYBB,E2F1,IFI27,IFNG,IL12RB2,IL1B,IRF5,ODC1	96 (20)
MAP3K1		kinase	Activated	2.2	bias	0.00393	ATF3,CXCL8,FOS,PLAUR,TIMP1	119 (18)
IL4R		transmembrane receptor				0.00393	CD14,FCER1G,IL12RB2,IL1B,IL2RA	113 (19)
MMP1		peptidase		1.477	bias	0.00393	CDKN1A,CXCL8,E2F1,FN1,FOS	112 (17)
SMARCA5		transcription regulator	Inhibited	-2.121	bias	0.00396	ALDH1B1,ATP8B4,CDKN1A,IL12RB2,IL2RA,IL7R,NKG7,SLC27A2
dimethyl sulfoxide		chemical drug		1.48	bias	0.00396	ADAM12,CXCL8,FOS,HSP90AB1,IL1B,KAT2B,PLD1,PLD2	131 (21)
LEF1		transcription regulator		0.215	bias	0.00401	CDK1,CDKN1A,CXCR4,FN1,GEM,IL7R,PRF1,SLC35D1,SPP1	86 (15)
HSF1		transcription regulator		0.731		0.00401	BAG3,BST2,CDK1,CLU,HSP90AB1,IL1B,IL7R,JARID2,PGK1,TMPRSS3,TRAF3	142 (18)
methylselenic acid		chemical reagent				0.00402	ATF3,CCNB2,CDK1,CDKN1A,CLU,DHCR24,E2F1,FN1,INPP4B,PRIM2,RFC5,RHOB	178 (22)
E. coli B4 lipopolysaccharide		chemical toxicant	Activated	2.79	bias	0.00404	CCL4,CCR7,CD40LG,CD86,CXCL8,F5,FCER1G,IFNG,IL1B,IL1RN,PLAUR,TNFRSF4,TRAM2	113 (19)
PRL		cytokine	Activated	2.655	bias	0.00404	BST2,CD69,CDKN1A,CLU,ENO1,FN1,FOS,IL2RA,KRT5,ODC1,RASD1,SPP1,TIMP1	131 (16)
leukotriene C4		chemical - endogenous mammalian				0.00405	CCL4,CXCL8,FOS	105 (14)
Ren2		peptidase				0.00405	CYBB,SPP1,TIMP1	68 (7)
Fcgr3		group				0.00405	CXCL8,IFNG,IL1RN	98 (16)
triclosan		chemical drug				0.00405	CYBB,FOS,TIMP1
Hmgb1		transcription regulator				0.00405	CDKN1A,CXCL8,IL1B	96 (15)
fontolizumab		biologic drug				0.00405	IFNG,IL12RB2,LAG3
UCP2		transporter				0.00405	EPAS1,IFNG,IL1B	94 (14)
GIP		other				0.00405	FOS,RGS2,SPP1	110 (22)
CD70		cytokine				0.00405	CD69,IFNG,IL2RA	84 (17)
PPP2R5C		other				0.00405	CD69,CXCL8,IFNG	130 (17)
KLK5		peptidase				0.00405	IL1B,S100A8,S100A9
IL19		cytokine				0.00405	CXCR4,FN1,IFNG	103 (17)
silicon dioxide		chemical drug				0.00405	CXCL8,FOS,IL1B	117 (20)
phenyl-N-tert-butylnitrone		chemical reagent				0.00405	CD86,CXCL8,FN1	98 (16)
ethidium		chemical drug				0.00405	CCNB2,PRC1,TIMP1	96 (7)
Secretase gamma		complex		0.628	bias	0.00412	CD86,CXCR1,IL2RA,RORC	65 (7)
daporinad		chemical drug	Inhibited	-2	bias	0.00412	FAM111B,IL1B,MCM10,TRIP13
CLN3		other	Activated	2	bias	0.00412	CPQ,CREG1,EPDR1,NPC2
CHRNA7		transmembrane receptor		-1.154	bias	0.00412	CDKN1A,IFNG,IL1B,IL1RN	104 (17)
PLAT		peptidase		1.91	bias	0.00412	FN1,FOS,IFNG,IL1B	96 (17)
CDC42		enzyme				0.00412	ATF3,CD86,FOS,IFNG	86 (16)
CCL5		cytokine	Activated	2.375	bias	0.00412	CCL4,CXCL8,FOS,IFNG,IL1B,PLAUR	92 (17)
TLR4		transmembrane receptor		1.975	bias	0.00419	ATF3,CCL4,CCR7,CD14,CD86,CERT1,CXCL8,IFNG,IL1B,IL2RA,IRF8,LTA,NSMAF,RIPK2,SLCO3A1,SPP1	108 (16)
oblimersen		biologic drug	Activated	2.219	bias	0.00425	ATF3,BST2,CDKN1A,CXCL8,IFI27
CDK9		kinase				0.00425	CDKN1A,CXCL8,CXCR4,FOS,ODC1	125 (19)
IL2RG		transmembrane receptor		-0.504		0.00425	FOS,IFNG,IL7R,NPC2,TXK	119 (18)
Ccl2		cytokine		1.413	bias	0.00425	CCL4,CCR2,CD14,IFNG,IL1B	110 (17)
JAG1		growth factor		1.188	bias	0.00425	CD86,CDKN1A,IFNG,PDGFRB,SPP1	85 (12)
carbon tetrachloride		chemical toxicant	Activated	2.717	bias	0.00429	ATF3,CCL4,CDKN1A,FN1,FOS,IFNG,IL1B,ODC1,PDGFRB,SPP1,TIMP1	119 (18)
medroxyprogesterone acetate		chemical drug		-1.089	bias	0.00435	C15orf48,CCL4,CCNB2,CD40LG,CDK1,CDKN1A,CXCR4,DIAPH3,E2F1,FN1,IFNG,IL1B,IL2RA,IL7R,ODC1,P4HA2,PBK,PRC1	176 (25)
CD38		enzyme	Activated	2.813	bias	0.00435	CD40LG,CD86,FN1,IL2RA,LTA,SKA1,TMEM97,ZBTB32,ZNF443	96 (13)
enterotoxin B		biologic drug	Activated	2.406	bias	0.00439	CCL4,CD69,CXCR4,IFNG,IL1B,IL2RA	103 (11)
MAP2K1/2		group	Activated	2.219	bias	0.00439	ATF3,CCL4,CDK1,FOS,IL1B,IL2RA	119 (19)
MMP9		peptidase		0.659		0.00439	CDKN1A,CXCR4,FOS,HPGD,IFNG,TIMP1	92 (16)
IFI16		transcription regulator		1.475	bias	0.00439	CCL4,CDKN1A,CXCL8,IL1B,IL1RN,IL7R	84 (15)
ATF3	6.371	transcription regulator		-1.118		0.00445	ATF3,CD69,CDK1,CDKN1A,IFNG,IL1B,RIPK2	131 (18)
MAPK14		kinase	Activated	2.61	bias	0.00449	CCR7,CD86,CXCL8,FN1,FOS,IFNG,IL1B,PLAUR,SPP1,TIMP1	94 (16)
ATF4		transcription regulator	Activated	2.587	bias	0.00449	ATF3,CDKN1A,CPOX,CXCL8,FN1,GPATCH1,SLC43A1,TBC1D16,WARS1,WFS1	74 (7)
TNFRSF1A		transmembrane receptor		0.698		0.00453	CCL4,CD86,CDKN1A,CXCL8,E2F1,IFNG,IL1B,KIF14,RORC	117 (18)
interferon alfacon-1		biologic drug		0	bias	0.00458	CD69,CXCL8,GNLY,SRGN
ABCG1		transporter		-1.938	bias	0.00458	CCL4,IFNG,IL12RB2,IL1B	107 (19)
IL17F		cytokine				0.00458	CXCL8,CXCR4,IFNG,LTA	124 (19)
lactic acid		chemical - endogenous mammalian		0.09	bias	0.00458	CXCL8,IFNG,IL1B,PRF1	102 (16)
sodium orthovanadate		chemical reagent		1.253	bias	0.00458	CDKN1A,CXCL8,IL2RA,PLAUR	126 (18)
eplerenone		chemical drug		-1.956	bias	0.00458	CYBB,FN1,IL1B,SPP1	101 (14)
CBL		transcription regulator	Inhibited	-2.186	bias	0.0046	CDKN1A,FN1,FOS,IFNG,IL1B	104 (19)
PIN1		enzyme	Activated	2.216	bias	0.00467	CDKN1A,CXCL8,FN1,IL1B,NCAPH,TIMP1	125 (17)
NFATC1		transcription regulator		1.934	bias	0.00468	CD40LG,CYBB,IFNG,IL1B,IL2RA,RORC,SPP1	118 (17)
aldosterone		chemical - endogenous mammalian	Activated	2.778	bias	0.00472	CYBB,FN1,FOS,IFNG,PLAUR,RGS2,SLC9A1,SPP1,TIMP1	93 (16)
EGFR		kinase	Activated	2.183	bias	0.00479	AMD1,BPNT2,CDK1,CDKN1A,CXCL8,CXCR4,E2F1,FOS,GZMB,IFNG,IL1B,ODC1,PARP2,PLAUR,PRF1,RHOB,RRAS,SLC22A5,SLCO4A1	160 (21)
tert-butyl hydroperoxide		chemical toxicant				0.00479	CLU,CXCL8,FN1	138 (19)
OPA1		enzyme				0.00479	IL1B,S100A8,S100A9	83 (9)
telapristone acetate		chemical drug				0.00479	CCNB2,CDK1,TPX2
DEF6		other				0.00479	FN1,FOS,IFNG	94 (16)
S100B		other				0.00479	CDKN1A,FOS,IL1B	105 (20)
TACR1		G-protein coupled receptor				0.00479	FOS,IFNG,IL1B	101 (16)
ITGAL		transmembrane receptor				0.00479	CD69,CD86,IL12RB2	92 (15)
RPS6KA3		kinase				0.00479	FOS,IFNG,TRAF3	88 (20)
magnolol		chemical - endogenous non-mammalian				0.00479	CDKN1A,CXCL8,FOS	104 (19)
lisinopril		biologic drug				0.00479	FOS,IL1B,PDGFRB	65 (7)
nicotine		chemical drug		0.858	bias	0.00482	CCL4,CD86,CDKN1A,CXCL8,ENO1,FN1,FOS,IL1B,PLAUR,SPP1	101 (17)
FOXO1		transcription regulator		1.196	bias	0.00485	BACH2,CCL4,CCNB2,CCR7,CDK1,CDKN1A,CXCL8,ELOVL6,FN1,FOS,HSP90AB1,IFNG,IL1B,IL7R,IRF5,PBK,PRC1,PRF1	100 (17)
MAPK9		kinase		1.395	bias	0.00491	CDKN1A,CXCL8,EPAS1,FOS,IFNG,IL12RB2,IL1B,LGALS3BP,LTA	150 (20)
glutamine		chemical - endogenous mammalian		0.128	bias	0.00493	CDKN1A,CXCL8,FN1,FOS,IFNG,LTA,WARS1	110 (19)
hexachlorobenzene		chemical toxicant		1.342	bias	0.00496	CD14,CLU,GTPBP4,SPP1,TIMP1
MAP2K7		kinase		0.9	bias	0.00496	ATF3,CDKN1A,CXCL8,FN1,RHOB	115 (19)
CXCL8	6.168	cytokine		-0.605	bias	0.00496	CD69,CXCL8,CXCR1,IL1B,IL2RA,PLD2	92 (17)
MAP3K14		kinase		1.387	bias	0.00496	CXCL8,IL1B,IL7R,LTA,PON2,TRAF3	86 (15)
CASP1		peptidase		1.226	bias	0.00508	IFNG,IL1B,RIPK1,RIPK2	138 (20)
NCSTN		peptidase		-1	bias	0.00508	CD14,FCER1G,IRF8,PSEN2	71 (7)
IGFBP3		other		0.152		0.00508	CCL4,CDK1,CDKN1A,IL1B	151 (21)
ACVRL1		kinase				0.00508	CDKN1A,CXCL8,CXCR4,PLAUR	65 (7)
rolipram		chemical drug		-0.283		0.00508	CD86,CXCR4,IFNG,IL1B	96 (15)
phorbol 12,13-dibutyrate		chemical - endogenous non-mammalian		1.996	bias	0.00508	CDKN1A,CXCL8,FOS,MAP3K8	87 (17)
uric acid		chemical - endogenous mammalian		1.492		0.00519	CCL4,CD86,CXCL8,IFNG,IL1B,PARP2,PRIM2	88 (18)
IFN alpha/beta		group		1.572	bias	0.00527	CCR2,CCR7,CD69,CD86,IFNG,IRF8	88 (16)
C3		peptidase		1.777	bias	0.00527	CCL4,CXCL8,FN1,IFNG,IL1B,TIMP1	92 (16)
PTHLH		other		0.577	bias	0.00527	CDK1,CDKN1A,CXCL8,FN1,FOS,RGS2	124 (23)
PPP3CA		phosphatase				0.00527	CD40LG,CDKN1A,FN1,PLD1,SPP1,STS	109 (15)
nitrofurantoin		chemical drug		1.188		0.00531	AMD1,CLU,GTPBP4,IFNG,IL1B,ODC1,SLC27A2,SPP1,TIMP1
MAP2K4		kinase	Activated	2.195	bias	0.00534	ATF3,CD86,CDKN1A,CXCL8,FOS	88 (16)
CD14	7.451	transmembrane receptor		1.274	bias	0.00534	CCL4,CXCL8,IFNG,IL1B,IL2RA	89 (18)
RGS10		enzyme				0.00534	CCR8,CD40LG,IFNG,IL1B,LTA	103 (19)
CCL11		cytokine	Activated	2.072	bias	0.00534	CCL4,CCR2,CXCL8,CXCR1,IL1B	92 (17)
benzene		chemical toxicant		0.625		0.00534	CDKN1A,DHCR24,PLD1,RHOB,SOS2
roxithromycin		chemical drug				0.00537	IFNG,IL1B
3M-003		chemical reagent				0.00537	IFNG,IL1B
N-hexanoylhomoserine lactone		chemical - endogenous non-mammalian				0.00537	IFNG,IL1B
Beta Arrestin		group				0.00537	FOS,IFNG	113 (19)
CCAR1		transcription regulator				0.00537	EPAS1,RGS2
KMT2E	-1.101	enzyme				0.00537	CDK1,E2F1
KLF17		transcription regulator				0.00537	CDKN1A,FN1
TLR10		transmembrane receptor				0.00537	CXCL8,IL1B	89 (18)
RDH8		enzyme				0.00537	CCL4,IFNG
PLSCR1		enzyme				0.00537	CDKN1A,ITPR1
HSPB2		other				0.00537	CD40LG,CXCL8
TPR		other				0.00537	CXCL8,IL1B
TNFRSF10A		transmembrane receptor				0.00537	CD14,IFNG	73 (11)
FGF13		growth factor				0.00537	CDKN1A,HSPA6
PROK2		other				0.00537	FOS,IL1B	86 (12)
SLC16A1		transporter				0.00537	CYBB,IFNG	76 (9)
CASP4		peptidase				0.00537	IFNG,IL1B	111 (18)
obinutuzumab		biologic drug				0.00537	CCL4,IFNG	66 (7)
GNAZ		enzyme				0.00537	CCL4,IFNG	74 (9)
ETV3		transcription regulator				0.00537	PRIM2,SPP1
W-54011		chemical reagent				0.00537	CD86,IL1B
OTUD7B		peptidase				0.00537	CXCL8,RIPK1	65 (7)
ITPR2		ion channel				0.00537	ITPR1,NCAPH
DYNLL1		other				0.00537	CDKN1A,FOS	77 (11)
FZD5		G-protein coupled receptor				0.00537	CD14,SPP1
PIP5K1B		kinase				0.00537	IL1B,PIP5K1A
PSMD4		other				0.00537	CD14,CD69	94 (13)
WRN		enzyme				0.00537	CDKN1A,CXCL8	69 (9)
HLA-DRB1		transmembrane receptor				0.00537	CD40LG,IFNG
VTX-2337		chemical drug				0.00537	GZMB,IL1B
taselisib		chemical drug				0.00537	CCL4,IFNG
BCL2A1		other				0.00537	CD69,CXCL8
ruboxistaurin		chemical drug				0.00537	CYBB,PDGFRB
praziquantel		chemical drug				0.00537	CXCL8,IFNG
3-hydroxyanthranilic acid		chemical - endogenous mammalian				0.00537	IFNG,RORC
FC-99		chemical reagent				0.00537	CD69,CD86	61 (7)
ZFA-fmk		chemical reagent				0.00537	IL1B,IL2RA	68 (10)
Z-IETD-FMK		chemical - protease inhibitor				0.00537	CXCL8,PLD1	68 (7)
colistin		biologic drug		-0.378		0.00545	CD69,FOS,LAG3,LGALS1,NRIP1,SLCO4A1,SPP1
EIF2AK3		kinase				0.00545	ATF3,CPOX,IL1B,PON2,TBPL1,WARS1,WFS1
Hdac		group		-1.435		0.00551	ATF3,CDKN1A,CXCL8,CXCR4,FOS,HPGD,IL1B,RORC,SPP1	148 (21)
IKZF2		transcription regulator		-1.964	bias	0.0056	CD69,IFNG,LAG3,ZBTB42
NOD1		other				0.00561	CXCL8,IL1B,TRAF3	75 (16)
NT5E		phosphatase				0.00561	IL1B,SPP1,TIMP1	89 (11)
ACTN4		transcription regulator				0.00561	CXCL8,FOS,IL1B	108 (20)
metyrapone		chemical drug				0.00561	CXCR4,FOS,IL1B	58 (7)
triflusal		chemical drug				0.00561	CCL4,CXCL8,IFNG	106 (11)
idarubicin		chemical drug				0.00561	CDKN1A,IL1B,TRIAP1	96 (7)
naltrexone		chemical drug				0.00561	GZMB,IFNG,PRF1	69 (9)
peroxynitrite		chemical toxicant				0.00561	CXCL8,FOS,RGS2	94 (19)
ZAP70		kinase		1.172	bias	0.00574	CCR7,CD69,IFNG,ITPR1,QPCT	85 (16)
FOXM1		transcription regulator		1.679	bias	0.0059	CCNB2,CDK1,CDKN1A,FOS,IL1RN,PGK1,PLAUR,PRC1	126 (20)
CFTR		ion channel		0.2		0.00592	CAPG,CXCL8,HPGD,ITPR1,S100A8,SLC27A2	84 (11)
sodium chloride		chemical - endogenous mammalian		1.957	bias	0.00592	CXCL8,CYBB,FN1,FOS,SLC9A1,SPP1	101 (17)
romidepsin		biologic drug		1.947		0.00592	CD86,CDKN1A,CXCL8,FOS,PLAUR,RHOB	87 (15)
thapsigargin		chemical toxicant	Activated	2.625	bias	0.00595	ATF3,CD86,CDKN1A,CLU,CXCL8,FN1,FOS,IL1B,RIPK1,WFS1	95 (15)
kanamycin A		chemical drug		-0.378		0.00601	CD69,FOS,LAG3,LGALS1,NRIP1,SLCO4A1,SPP1
S-nitroso-N-acetyl-DL-penicillamine		chemical reagent		1.461		0.00617	CDKN1A,CXCL8,IFNG,SPP1,TIMP1	120 (16)
IL1R1		transmembrane receptor	Activated	2.17	bias	0.00617	CXCL8,FOS,IL1B,IL1RAP,TIMP1	116 (18)
STAT		group				0.00617	CDKN1A,FOS,IL2RA,TIMP1	113 (12)
SPRY2		other				0.00617	CDKN1A,EPAS1,FOS,PGK1	101 (18)
CD80		transmembrane receptor		1.91		0.00617	CD40LG,IFNG,IL1B,IL2RA	100 (20)
ethylene glycol tetraacetic acid		chemical reagent		-1.953	bias	0.00617	CD86,CXCL8,FOS,IFNG	87 (17)
thalidomide		chemical drug		-1.986	bias	0.00617	CXCL8,IFNG,IL1B,PLAUR	96 (20)
S100A9	6.687	other	Activated	2.208	bias	0.00618	ATF3,CD69,CXCL8,GZMB,IFNG,IL1B,S100A8,S100A9,TNFRSF4	113 (18)
testosterone		chemical - endogenous mammalian	Activated	3.06	bias	0.00622	AMD1,CDKN1A,CLU,DHCR24,FN1,FOS,HSP90AB1,IFNG,IL1B,LGALS1,MAL,ODC1,SLC9A1,SYK,TK1	146 (20)
genistein		chemical drug		0.869		0.00626	CCNB2,CCR2,CD86,CDK1,CDKN1A,CLU,CTSF,CXCL8,CXCR1,FOS,HPGD,IL1B,NPC2,PXMP4,SLFN12,SPP1	100 (18)
5-O-mycolyl-beta-araf-(1->2)-5-O-mycolyl-alpha-araf-(1->1')-glycerol		chemical - endogenous non-mammalian		1.633	bias	0.00627	ATF3,CCL4,CCR7,CXCL8,GPAT3,IL1B	94 (12)
spironolactone		chemical drug		-1.431	bias	0.00627	CCR7,CDKN1A,CXCR4,FN1,IL1B,SLC9A1	109 (19)
5-azacytidine		chemical drug		0.498	bias	0.00641	CDKN1A,FANCC,FANCE,FANCG,IFNG,IRF8,PRF1,RHOB,SLC9A1	104 (10)
ssRNA40		chemical reagent				0.00651	CD86,IFNG,IL1B	89 (17)
SAV1		other				0.00651	CDKN1A,FN1,SPP1	65 (7)
mir-192		microRNA				0.00651	CDKN1A,CXCL8,FN1	122 (11)
MLX		transcription regulator				0.00651	ELOVL6,IL1RN,LGALS3BP
LY6E		other				0.00651	CD14,CXCL8,IL1B	54 (7)
TLR1		transmembrane receptor				0.00651	CXCL8,IFNG,IL1B	87 (17)
BID		other				0.00651	CXCL8,IL1B,TIMP1	104 (16)
PTK2B		kinase				0.00651	CXCL8,FOS,IFNG	100 (19)
NAB2		transcription regulator				0.00651	CDKN1A,FN1,FOS	55 (5)
HRG		other				0.00651	CXCR4,SPP1,TIMP1	79 (7)
sulfasalazine		chemical drug				0.00651	CXCL8,GZMB,IL1B	104 (17)
palmitic acid		chemical - endogenous mammalian	Activated	3.206	bias	0.00653	ATF3,CCL4,CD86,CDKN1A,CXCL8,CYBB,ELOVL6,FN1,FOS,IL1B,IL1RN	84 (13)
IL11		cytokine		0.651		0.00662	CXCL8,FOS,IL1B,SPP1,TIMP1	97 (16)
N-acetylmuramyl-L-alanyl-D-isoglutamine		chemical - endogenous non-mammalian		1.951	bias	0.00662	CCL4,CD86,CXCL8,IL1B,IL2RA	99 (18)
IFNL1		cytokine		1.804	bias	0.00663	ATF3,BST2,CCR7,CXCL8,IFI27,LGALS3BP	98 (14)
PIK3R1		kinase		1.755	bias	0.00663	CCL4,CXCL8,FOS,IFNG,IL1B,PDGFRB	103 (21)
LYN		kinase		-0.747	bias	0.00663	CCL4,CD86,CDKN1A,IFNG,IL1B,ITPR1	109 (16)
homocysteine		chemical - endogenous mammalian		1.685	bias	0.00663	ATF3,CDKN1A,CLU,CXCL8,IL1B,TIMP1	126 (19)
metribolone		chemical reagent	Activated	2.172	bias	0.00664	ALDH1B1,CDKN1A,CENPN,CLU,CPOX,CXCR4,DHCR24,ENO1,FH,FOS,GOT1,INPP4B,NQO2,PGK1,SLC22A5,SLC30A9,STYK1	144 (18)
PTH		other		1.905	bias	0.00666	CDKN1A,CXCR4,DISC1,FN1,FOS,ODC1,PHLDB2,RGS2,SPP1	120 (20)
ritonavir		chemical drug				0.00669	ABHD2,CD59,CXCL8,ECT2,IL1B,KIF14,NCAPH,NUF2	74 (7)
SERPINE2		other		-1.964	bias	0.00677	CCL4,IFNG,IL1B,LTA	107 (13)
FCGR2A		transmembrane receptor		1.989	bias	0.00677	CCL4,CXCL8,IFNG,IL1B	83 (15)
paricalcitol		chemical drug		-1.982	bias	0.00677	FN1,IFNG,IL1B,TIMP1	90 (11)
VEGFA		growth factor		1.965	bias	0.00686	CD160,CD86,CDKN1A,CXCL8,CXCR4,E2F1,FN1,FOS,IFNG,IL1B,LAG3,PDGFRB,TIMP1	132 (19)
NFYB	2.034	transcription regulator				0.00688	AMD1,CCNB2,CDK1,EPAS1,FAM214B,HCCS,HMGB2,KMT2E,PDGFRB,PXMP4,RHOB,SPAG16
norepinephrine		chemical - endogenous mammalian		0.895	bias	0.0069	CXCL8,CXCR4,ELOVL6,FN1,FOS,GEM,IFNG,IL1B,NPHP4	102 (16)
WT1		transcription regulator		0.124		0.00694	CDKN1A,IL1B,IL1RAP,IRF8,MPP1,NQO2,ODC1,PLAUR,TMA16,WARS1,ZDHHC9
ELAVL1		other	Activated	2.204	bias	0.00704	ATF3,CD86,CDKN1A,FOS,LGALS3BP,NUF2,PBK,PRC1,RFC5,WARS1	130 (16)
C5AR1		G-protein coupled receptor	Activated	2.216	bias	0.00708	CD86,CXCL8,FCER1G,IFNG,IL1B	80 (16)
APP		other	Activated	2.507	bias	0.00712	ASCC1,CCL4,CD59,CD69,CD86,CDK1,CDKN1A,CLU,CXCL8,CXCR4,CYBB,CYRIA,ENO1,EPAS1,FBXL20,FN1,FOS,HSP90AB1,IFNG,IL1B,IL4I1,IRF5,MCM10,OSM,PDGFRB,PGK1,PSEN2,S100A8,TENM1,TRAF3	149 (19)
NCOA2		transcription regulator		-0.547	bias	0.00726	ALDH1B1,CCL4,CCR7,CDKN1A,ELOVL6,IFNG,IL1B,RAI1	105 (19)
NR3C2		ligand-dependent nuclear receptor		1.432		0.00726	CXCL8,CXCR4,FN1,IL1B,NFIA,RGS2,SLC9A1,TGFBI	133 (21)
losartan potassium		chemical drug	Inhibited	-2.037	bias	0.00727	CXCL8,CYBB,FN1,FOS,IL1B,SPP1,TIMP1	102 (17)
AREG		growth factor	Activated	2.433	bias	0.00741	CCNB2,CXCR4,FOS,HJURP,KIF14,PRC1	90 (13)
TFRC		transporter	Inhibited	-2	bias	0.00741	ATF3,CD300A,CDK1,CDKN1A,FOS,MS4A6A
IRF5	5.605	transcription regulator		1.342	bias	0.00741	CCL4,CDKN1A,CXCR4,IRF5,RIPK1,ZNF443	92 (12)
ATP7B		transporter		-1		0.00741	AACS,ELOVL6,SHCBP1,TRIP13
CEACAM1		transporter				0.00741	CD86,CXCL8,CXCR4,IFNG	93 (17)
mitoxantrone		chemical drug		1.982		0.00741	CDKN1A,CXCL8,IL1B,PERP	114 (15)
patulin		chemical toxicant				0.00742	ATF3,IL1B
ZNF512B		transcription regulator				0.00742	E2F1,MIR17HG
SFRP5		transmembrane receptor				0.00742	CXCR4,IL1B	64 (7)
nadifloxacin		chemical drug				0.00742	CXCL8,IFNG
HLA-DQ		complex				0.00742	FOS,IL1B	114 (12)
MEFV		other				0.00742	CXCL8,IL1B	82 (13)
IL23R		transmembrane receptor				0.00742	IFNG,RORC	65 (11)
NUP107		other				0.00742	FOS,NUP214
RBX1		enzyme				0.00742	CDK1,RHOB
P2RY1		G-protein coupled receptor				0.00742	FN1,FOS	110 (14)
CTSE		peptidase				0.00742	CD86,IL1B
TPSD1		peptidase				0.00742	CXCL8,IFNG	112 (17)
DRD5		G-protein coupled receptor				0.00742	IFNG,PLD2
CKS1B		kinase				0.00742	CDK1,CXCL8
PIP5K1C		kinase				0.00742	IFNG,PIP5K1A
LPAR2		G-protein coupled receptor				0.00742	CXCL8,FN1	117 (15)
IL18RAP		transmembrane receptor				0.00742	CXCL8,IFNG	107 (19)
PLA2G2A		enzyme				0.00742	CD69,CXCL8	72 (11)
MS4A1		other				0.00742	CD69,CD86	61 (7)
cepharanthine		chemical reagent				0.00742	CXCL8,IL1B
KLRB1		transmembrane receptor				0.00742	CCL4,IFNG	92 (14)
CD79A		transmembrane receptor				0.00742	CD40LG,IL2RA
PDE4D		enzyme				0.00742	FN1,IFNG	82 (12)
RHOC		enzyme				0.00742	ATF3,CDKN1A	72 (7)
dacarbazine		chemical drug				0.00742	CDKN1A,CXCL8	109 (15)
ubiquinone 9		chemical - endogenous mammalian				0.00742	IFNG,IL1B	76 (11)
4-coumaric acid		chemical - endogenous mammalian				0.00742	CDKN1A,ODC1
RWJ 67657		chemical - kinase inhibitor				0.00742	CXCL8,IL1B	92 (12)
eugenol		chemical - endogenous non-mammalian				0.00742	CDKN1A,CXCL8	68 (7)
BAR501		chemical reagent				0.00742	IFNG,IL1B
leucovorin		chemical - endogenous mammalian				0.00742	CDK1,CDKN1A
Boc-D-FMK		chemical reagent				0.00742	CXCL8,SYK
Muscarinic cholinergic receptor		group				0.00742	FOS,RGS2	67 (10)
vinpocetine		chemical drug				0.00742	CXCL8,IL1B	59 (10)
Fibrinogen		complex				0.00748	CCL4,CXCL8,IL1B	118 (19)
Aldose Reductase		group				0.00748	CXCL8,E2F1,IL1B	97 (19)
Iga		complex				0.00748	CD86,CXCL8,IL1B	88 (16)
PARG		enzyme				0.00748	IL1B,ITPR1,LGALS3BP	85 (7)
COL2A1		other				0.00748	CXCR4,IFNG,IL1B	89 (14)
GNAI3		enzyme				0.00748	CCL4,CXCL8,SPP1	100 (19)
ODC1	1.374	enzyme				0.00748	IL1B,ODC1,PDGFRB	38 (4)
SMARCE1		transcription regulator				0.00748	CDK1,FOS,NPC2
RNASE1		enzyme				0.00748	CCL4,IL2RA,OSM
CBX3		transcription regulator				0.00748	CDK1,CDKN1A,E2F1
ADORA3		G-protein coupled receptor				0.00748	CCL4,CXCL8,SPP1	99 (17)
HMGA2		enzyme				0.00748	CXCR4,IL2RA,SPP1	65 (7)
butaprost		chemical drug				0.00748	CCL4,CCR7,IL1B	84 (12)
nickel		chemical toxicant				0.00748	CD86,CXCL8,IL1RN	85 (15)
NRIP1	7.073	transcription regulator		-0.528	bias	0.00757	CCNB2,CDK1,CDKN1A,IL1B,TK1	135 (18)
sodium arsenite		chemical drug	Activated	2.186	bias	0.00757	CDKN1A,CXCL8,ENO1,EPAS1,FOS	96 (15)
Mek		group	Activated	2.33	bias	0.00762	ABCE1,BPNT2,CDKN1A,CLU,CXCL8,EPAS1,FOS,IFNG,IL1B,NCEH1,OSM,PDGFRB,SLC22A5,SLCO4A1	137 (21)
LCN2		transporter		0.64	bias	0.00781	CAPG,CCL4,IL1B,IL1RN,KIF23,SPP1	118 (14)
TCL1A		transcription regulator				0.00781	CYBB,FCER1G,FOS,IL1B,S100A8,S100A9	80 (7)
TICAM1		other		1.846	bias	0.00787	CCL4,CCNL2,CD86,CXCL8,IFNG,IL1B,RHOB,RIPK2	98 (18)
aspirin		chemical drug	Inhibited	-2.203	bias	0.00797	CCL4,CD86,CDKN1A,CXCL8,CXCR4,HPGD,IFNG,IL1B,PDGFRB	133 (21)
mir-181		microRNA		-1.172	bias	0.00809	CD69,CXCL8,IFNG,IL1B,IRF8	113 (12)
F2RL1		G-protein coupled receptor	Activated	2.187	bias	0.00809	CXCL8,FOS,IFNG,IL1B,IRF8	92 (18)
DDX5		enzyme				0.00809	CDKN1A,FH,FOS,NET1,TIMP1	133 (13)
gentamicin C		chemical drug		1.342	bias	0.00809	CD14,CLU,GTPBP4,SPP1,TIMP1
rotenone		chemical toxicant		-0.415		0.00809	CYBB,FOS,IFNG,IL1B,TIMP1	93 (17)
mir-22		microRNA		-0.882	bias	0.00809	ARRB1,CDKN1A,MALAT1,RGS2	29 (4)
F7		peptidase		1.049	bias	0.00809	CXCL8,FOS,IL1B,PLAUR	114 (18)
THBS1		other				0.00809	CD69,FN1,IL1B,TIMP1	88 (17)
TLR7/8		group	Activated	2	bias	0.00809	GEM,MAP3K8,PLAUR,RECQL4
zoledronic acid		chemical drug		1	bias	0.00809	CXCL8,CXCR4,IFNG,IL2RA	129 (17)
hydrocortisone		chemical - endogenous mammalian	Inhibited	-2.156		0.00818	CD86,CDK1,CXCL8,CXCR4,FN1,IL1B,IL2RA,S100A8	100 (16)
morphine		chemical drug		-0.226	bias	0.00818	ARRB1,CDKN1A,CXCL8,CYBB,FOS,IFNG,IL1B,NET1	105 (18)
gefitinib		chemical drug				0.00825	CXCL8,ECT2,KIF23,MTBP,OSM,PLAUR,PRC1,RHOB,S100A9	79 (7)
prostaglandin A1		chemical - endogenous non-mammalian				0.00854	CD14,CDKN1A,CXCL8	122 (18)
Tnf receptor		group				0.00854	CXCL8,RIPK1,TIMP1	128 (19)
ETS		group				0.00854	FOS,HPGD,TIMP1
IgG1		complex				0.00854	CD14,CD86,CXCL8	110 (19)
MAPK12		kinase				0.00854	FOS,IL1B,MAP3K8	151 (21)
MAP3K5		kinase				0.00854	CDKN1A,CXCL8,CYBB	91 (19)
CXCR3		G-protein coupled receptor				0.00854	CD69,FN1,IFNG	100 (18)
IND S1		chemical - kinase inhibitor				0.00854	ENO1,FH,PGK1
PTPN3		phosphatase				0.00854	CDKN1A,FN1,TGFBI	135 (16)
cuprizone		chemical toxicant				0.00854	CCL4,FOS,IL1B
methotrexate		chemical drug		-1.29		0.00854	ABCD1,AMD1,CCL4,CDKN1A,CXCL8,EPAS1,IFNG,IL1B,PLD2,SLC27A2,SPP1	101 (16)
12-(3-adamantan-1-yl-ureido) dodecanoic acid		chemical reagent		0		0.00863	CD40LG,LHX4,LTA,RIPK2,TRAF3
lomustine		chemical drug		1.109	bias	0.00863	CD14,CLU,GTPBP4,SPP1,TIMP1
sulindac		chemical drug				0.00863	CCNB2,CDK1,CDKN1A,E2F1,IL1B	139 (20)
folic acid		chemical - endogenous mammalian		1.246		0.00863	CDKN1A,CLU,CYBB,FN1,IFI27	101 (16)
RASSF1		other		0.97		0.00868	CDKN1A,CLU,CREG1,CXCR4,FOS,SPP1	104 (16)
BCR-ABL1		fusion gene/product		1.524	bias	0.00868	CXCR4,EPAS1,IL1RAP,IL2RA,OSM,PGK1	67 (8)
PCGEM1		other		1.091	bias	0.0088	DHCR24,ENO1,FH,PGK1
CD2		transmembrane receptor		1.207	bias	0.0088	CCR7,CD40LG,CD86,IFNG	110 (18)
PTGS1		enzyme				0.0088	ATF3,CYBB,GEM,IL1B	95 (13)
FASLG		cytokine		1.301		0.0088	CXCL8,FOS,IFNG,IL1B	98 (20)
everolimus		chemical drug		-0.943		0.0088	CCNB2,CDK1,CDKN1A,NCEH1	62 (4)
phenacetin		chemical drug	Activated	2	bias	0.0088	CLU,GTPBP4,SPP1,TIMP1
pentoxifylline		chemical drug		-1.154	bias	0.0088	CYBB,FOS,IL1B,TIMP1	87 (14)
ribavirin		chemical drug		1.683	bias	0.0088	CD86,CXCL8,IFI27,IFNG	94 (21)
HMGA1		transcription regulator	Activated	2.598		0.00884	CLCN6,FOS,IL2RA,LTA,PSEN2,RHOB,SLC27A2,SYK
gentamicin		chemical drug		1.146		0.00901	ATF3,CD69,CLU,CPQ,FOS,IL1B,LAG3,LGALS1,NAA15,NRIP1,SLC22A5,SLCO4A1,SPP1,TIMP1	79 (7)
triamterene		chemical drug		1.172	bias	0.00919	CD14,CLU,GTPBP4,SPP1,TIMP1
Tnf (family)		group	Activated	2.764	bias	0.00919	ATF3,CCL4,CD86,CXCL8,IFNG,IL12RB2,IL1B,TNFRSF4	85 (16)
GW3965		chemical reagent		-1.323		0.00949	CCL4,CD86,CXCL8,IL1B,IL1RN,KIF23,TRIB1	76 (11)
PRKAA1		kinase		-1.316	bias	0.00954	ATF3,CDKN1A,CLU,CXCL8,FN1,IFNG,RGS2,ZDHHC9	97 (20)
mir-150		microRNA		-1	bias	0.00956	CXCR4,GZMB,IFNG,IL2RA	77 (10)
IRAK1		kinase		1.963	bias	0.00956	CXCL8,IFNG,IL1B,RORC	91 (19)
HBB		transporter		-1	bias	0.00956	CCL4,CXCL8,IFNG,IL1B	70 (10)
FOXP1		transcription regulator		-1.982		0.00956	CDKN1A,GZMB,IFNG,NFIA
D-galactosamine		chemical - endogenous mammalian		1.951	bias	0.00956	CD14,FOS,IFNG,TIMP1	84 (18)
trans-cinnamaldehyde		chemical drug				0.00968	CDKN1A,CXCL8,LTA	82 (11)
IL17a dimer		complex				0.00968	CCL4,IFNG,IL1B	81 (7)
FAM3B		cytokine				0.00968	CDKN1A,FN1,LGALS1
MBP		other				0.00968	CD300A,IFNG,IL12RB2
RAG1		enzyme				0.00968	CD86,IFNG,IL2RA	81 (9)
DYRK1A		kinase				0.00968	CDK1,CDKN1A,E2F1	152 (18)
epicatechin gallate		chemical drug				0.00968	CDKN1A,CXCL8,PERP	123 (17)
2,4-dinitrofluorobenzene		chemical toxicant				0.00968	CCL4,IFNG,IL1B	115 (13)
tetrandrine		chemical drug				0.00968	CDKN1A,CXCL8,IL1B	107 (18)
beta-glycerophosphoric acid		chemical - endogenous mammalian				0.00968	CCNB2,CDKN1A,SPP1
UDP		chemical - endogenous mammalian				0.00977	CCL4,CXCL8	143 (21)
rhodamine 6G		chemical toxicant				0.00977	CCNB2,PRC1
Cyclin A		group				0.00977	CDK1,CDKN1A	155 (19)
Tlr13		other				0.00977	CXCL8,IL1B	79 (12)
IL-2R		complex				0.00977	FOS,IL2RA	66 (9)
Lefty		group				0.00977	CDKN1A,SMAD5
IL26		cytokine				0.00977	CXCL8,IL1B	69 (15)
sotrastaurin		chemical drug				0.00977	CD69,IL2RA	85 (16)
parathyroid hormone-related protein		biologic drug				0.00977	FN1,FOS	93 (11)
immune complex		complex				0.00977	IFNG,IL1RN	75 (12)
CD8A		other				0.00977	IFNG,IL1B	89 (15)
U1 snRNP		complex				0.00977	CCL4,IFNG
MTBP	9.926	other				0.00977	CDKN1A,ODC1
FEM1A		transcription regulator				0.00977	CCL4,IL1B	116 (15)
CYP4A11		enzyme				0.00977	FN1,S100A8
DGKZ		kinase				0.00977	CD69,IFNG	68 (7)
CD276		other				0.00977	CXCL8,IFNG	99 (15)
LY86		other				0.00977	CD14,CD86
GALP		other				0.00977	FOS,IL1B	75 (7)
NCR3		transmembrane receptor				0.00977	CCL4,IFNG	88 (18)
TNFRSF10B		transmembrane receptor				0.00977	CXCL8,IFNG	102 (19)
cariporide		chemical drug				0.00977	SLC9A1,SPP1
R59949		chemical - kinase inhibitor				0.00977	CXCL8,FOS	125 (13)
coumestrol		chemical toxicant				0.00977	FOS,HSP90AB1
domoic acid		chemical toxicant				0.00977	FOS,IL1B	116 (16)
epoxyeicosatrienoic acid analog B		chemical reagent				0.00977	CYBB,IL1B
epoxyeicosatrienoic acid analog A		chemical reagent				0.00977	CYBB,IL1B
astragaloside IV		chemical - endogenous non-mammalian				0.00977	IFNG,RORC
polaprezinc		biologic drug				0.00977	CXCL8,ODC1
artemisinin		chemical drug				0.00977	CDKN1A,E2F1	123 (11)
SHC1		other		0.133		0.00977	CCR7,CD69,CDKN1A,FOS,HMGB2	88 (14)
TRIM28		transcription regulator				0.00977	CXCR4,EPAS1,IFNG,S100A9,ZNF77	83 (10)
4-hydroxytamoxifen		chemical drug		1.701	bias	0.0098	ATF3,CDKN1A,CLU,FOS,IFNG,IL7R,RASD1,S100A9,TMEM97	152 (21)
ARNT		transcription regulator		1.827	bias	0.00991	CCR7,CXCR4,ENO1,EPAS1,MPP1,PGK1,PRF1	76 (7)
ATF2		transcription regulator				0.0101	ATF3,CXCL8,FN1,FOS,IFNG,RHOB
PPARG		ligand-dependent nuclear receptor		-0.175		0.0103	AGPAT2,ARL4D,CCR7,CDKN1A,CXCL8,ELOVL6,EPAS1,FN1,IFNG,IL1B,IL2RA,ITGAD,ODC1,RHOB,RORC,S100A8,SLC9A1,SPP1
Igm		complex				0.0104	CD40LG,CD69,CDKN1A,CXCL8,IL2RA
3,3'-diindolylmethane		chemical drug		0.323		0.0104	ATF3,CDKN1A,IFNG,IL1B,PARP2
caffeine		chemical drug		-0.401		0.0104	CDK1,CDKN1A,CXCL8,EPAS1,FOS
Ngf		group	Activated	2.203	bias	0.0104	CDKN1A,CLU,FOS,ODC1,PLAUR
STAT5B		transcription regulator		1.974		0.0106	AGPAT2,CDKN1A,FOS,IFNG,IL2RA,LTA,OSM,RASD1,SPAG16,TNFRSF4,TRAF3,WARS1
erlotinib		chemical drug		0.64	bias	0.0106	CD14,CXCL8,CYBB,IL1B,PLAUR,RIPK1
MAP3K8	2.105	kinase		1.64		0.0107	CCL4,CCR2,CXCL8,FOS,IFNG,IL1B,IL4I1,SLCO4A1
3M-002		chemical reagent		1.969		0.0108	CCL4,CD300A,CD69,CD86,IFNG,IL1B,LTA
PELP1		other				0.0108	CXCL8,EPDR1,FOS,IL1B,KAT2B,PRMT6,S100A9
ADCY		group				0.0109	CDKN1A,FOS,IL1B
PDGF-AA		complex				0.0109	CDK1,CDKN1A,FOS
shikonin		chemical drug				0.0109	CXCL8,IL1B,TIMP1
RNF20		enzyme				0.0109	CDKN1A,FOS,RHOB
CD81		other				0.0109	CD86,IFNG,IL2RA
LINC00963		other				0.0109	CXCR4,FN1,IL4I1
resolvin D2		chemical - endogenous mammalian				0.0109	CXCL8,IL1B,IRF5
MAP3K3		kinase				0.0109	CXCL8,FOS,IFNG
ETV1		transcription regulator				0.0109	CXCR4,E2F1,PLAUR
TGFB1I1		transcription regulator				0.0109	CDKN1A,FN1,FOS
NTRK1		kinase				0.0109	CDKN1A,FOS,LGALS1
Mt2		other				0.0109	ATF3,FOS,IL1B
oxazolone		chemical reagent				0.0109	IFNG,IL1B,S100A8
desipramine		chemical drug				0.0109	CDKN1A,FOS,IL1B
poly dA-dT		chemical reagent				0.0109	CXCL8,IFNG,IL1B
SB 290157		chemical reagent				0.0109	CD86,IL1B,SPP1
PLAU		peptidase	Activated	2.214	bias	0.011	FN1,IL1B,PLAUR,S100A8,S100A9
EFNA1		other		-0.555		0.011	APOBEC3G,BACH2,CD69,FN1,IL2RA
gemcitabine		chemical drug		1.957	bias	0.011	CDKN1A,CXCL8,CXCR4,IL1B,RIPK1
fenamic acid		chemical reagent		1.172	bias	0.011	CD14,CLU,GTPBP4,SPP1,TIMP1
Ifnar		group		1.561	bias	0.0111	CD86,FCER1G,IFNG,IL1B,IRF8,SPP1
PTGS2		enzyme		1.762	bias	0.0112	CCL4,CCR7,CDKN1A,CLU,CXCL8,CXCR4,FN1,FOS,IL1B
thymoquinone		chemical drug				0.0112	CD14,CDKN1A,CXCR4,E2F1
GPX1		enzyme		-1.969	bias	0.0112	CCL4,CD14,CYBB,RIPK1
Irgm1		other		-1.982	bias	0.0112	CCNB2,GINS1,IFNG,TK1
advanced glycation end-products		chemical - endogenous mammalian				0.0112	CDKN1A,CXCL8,FN1,SPP1
STK11		kinase		0.7		0.0114	ATF3,CDKN1A,ENO1,FN1,IFNG,IL1RAP,NET1,PGK1,PRIM2,SPP1,TNFRSF4,UMPS
CREM		transcription regulator				0.0115	ATF3,CD86,CXCL8,FOS,IFNG,NPC2,PGK1,RHOB
JAK1		kinase		1.387	bias	0.0117	CD14,CDKN1A,FOS,IL1B,MAP3K8
CDK19		kinase		-1.633	bias	0.0117	ATF3,CDKN1A,CGRRF1,CLU,CXCL8,DRAM1
HDAC3		transcription regulator				0.0117	CCNB2,CDKN1A,CXCL8,ELOVL6,FOS,SPP1
olanzapine		chemical drug		0		0.0117	ATF3,FOS,IL1RAP,RGS2,S100A8,S100A9
FGF1		growth factor		1.673		0.0117	CDKN1A,FOS,IL1B,ODC1,PXYLP1,SPP1,ZNF589
celecoxib		chemical drug		-0.43		0.0117	CDKN1A,E2F1,FOS,IFNG,IL1B,RIPK1,RIPK2
Nr1h		group		-0.792		0.0119	CCR2,CCR7,CXCL8,ELOVL6,ERCC8,IL1B,ITPR1,UBE4B
alitretinoin		chemical drug		1.075	bias	0.0119	CD14,CD86,CDKN1A,FN1,FOS,IL2RA,SPP1,TK1
VitaminD3-VDR-RXR		complex		1.154	bias	0.0121	CD14,CDKN1A,IFNG,SPP1
Hbb-b2		other	Activated	2	bias	0.0121	CCR2,CYBB,FN1,IL1B
CRP		other				0.0121	CXCL8,IFNG,IL1B,IL1RN
rituximab		biologic drug				0.0122	CCL4,CDKN1A,IFNG
BIRC3		enzyme				0.0122	CXCL8,IFNG,IL1B
TRA		transmembrane receptor				0.0122	CDKN1A,IFNG,IL2RA
E2F5		transcription regulator				0.0122	CDK1,CDKN1A,E2F1
GW7647		chemical drug				0.0122	NPC2,SLC22A5,SLC27A2
tosylphenylalanyl chloromethyl ketone		chemical - protease inhibitor				0.0122	CXCL8,GZMB,PRF1
SREBF1		transcription regulator	Activated	2.149	bias	0.0123	AACS,CD14,CDKN1A,ELOVL6,FN1,IL1B,P4HA2,PIK3R3,SLC22A5,SV2A,TMEM97
IGF1R		transmembrane receptor		1.551	bias	0.0123	CAPG,CD300A,CDK1,CDKN1A,CETN2,CLU,CTNND1,FOS,IL1B,KRT5,SPP1,TGFBI
16,16-dimethylprostaglandin E2		chemical - endogenous mammalian				0.0124	FOS,IL1B
R 59022		chemical - kinase inhibitor				0.0124	CD69,CXCL8
L-cysteine		chemical - endogenous mammalian				0.0124	CXCL8,FOS
abatacept		biologic drug				0.0124	IFNG,TNFRSF4
Mir218		microRNA				0.0124	CXCR4,SPP1
Ck2		complex				0.0124	CYBB,FOS
cytidylyl-3'-5'-guanosine		chemical reagent				0.0124	CD86,IL1B
bendamustine		chemical drug				0.0124	CDKN1A,EXO1
HTR7		G-protein coupled receptor				0.0124	FOS,IL1B
salmonella typhimurium lipopolysaccharide		chemical - endogenous non-mammalian				0.0124	CD86,IL1B
EGLN2		enzyme				0.0124	CXCL8,EPAS1
TPSAB1/TPSB2		peptidase				0.0124	FN1,IL1B
ABCD1	8.267	transporter				0.0124	IL1B,SLC27A2
PI3		other				0.0124	CXCL8,IFNG
PRTN3		peptidase				0.0124	CDKN1A,CXCL8
SHOX		transcription regulator				0.0124	CDK1,CDKN1A
IL4I1	9.102	enzyme				0.0124	CXCL8,IFNG
Ighg2b		other				0.0124	IFNG,IL1B
NELFA		other				0.0124	CCNB2,CDKN1A
CD160	7.145	transmembrane receptor				0.0124	FOS,IFNG
PPP1CA		phosphatase				0.0124	FOS,SPP1
MCAM		other				0.0124	ATF3,FN1
XCL1		cytokine				0.0124	IFNG,IL2RA
DDB1		other				0.0124	CDKN1A,E2F1
BRMS1		transcription regulator				0.0124	CXCR4,SPP1
NELFE		other				0.0124	CCNB2,CXCL8
niflumic acid		chemical drug				0.0124	CD86,CXCL8
capsazepine		chemical toxicant				0.0124	CXCL8,FOS
1,1-bis(3'-indolyl)-1-(4-trifluoromethyl-phenyl)methane		chemical reagent				0.0124	ATF3,CDKN1A
prodigiosin		chemical toxicant				0.0124	CDKN1A,IL2RA
JMF3086		chemical reagent				0.0124	IFNG,IL1B
MK2 inhibitory peptide		chemical - kinase inhibitor				0.0124	FN1,IL1B
thymidine		chemical - endogenous mammalian				0.0124	CDKN1A,TK1
CEBPB		transcription regulator	Activated	2.516	bias	0.0126	CCL4,CCNB2,CD14,CDKN1A,CXCL8,CXCR4,E2F1,FN1,FOS,GNLY,IFNG,IL1B,IL1RN,ODC1,PLAUR,SPP1
IRF2		transcription regulator		1.841	bias	0.0127	CD14,CDKN1A,IFNG,IL12RB2,IL1B,IRF8,SRGN
SMAD2		transcription regulator		0.73	bias	0.0128	ADAM12,CDKN1A,FN1,GZMB,IFNG,NET1
STAT4		transcription regulator	Activated	2.074	bias	0.013	CCNL2,CD40LG,FCER1G,IFNG,IL12RB2,IL2RA,MAP3K8,P4HA2,RNF130,TIMP1
roscovitine		chemical drug		-1.982	bias	0.013	CDKN1A,FN1,IFNG,TNFRSF4
lysophosphatidylcholine		chemical - other	Activated	2.229	bias	0.0131	CXCL8,IL1B,IL2RA,PLAUR,RGS2
GNA14		enzyme				0.0131	ATF3,CXCL8,IL1RN,MAP3K8,PLAUR
ATM		kinase		1.993	bias	0.0131	CDKN1A,CLU,CXCL8,FN1,HSP90AB1
silibinin		chemical drug		-1.195	bias	0.0131	CDK1,CDKN1A,CXCL8,FN1,PLAUR
mir-8		microRNA		-1.756	bias	0.0131	ADAM12,ATF3,CDKN1A,FN1,IFNG,IL1B,PERP,PIP5K1A,SMAD5
kainic acid		chemical toxicant	Activated	2.727	bias	0.0132	ATF3,E2F1,FOS,IL1B,ODC1,RGS2,SPP1,TIMP1
INHBA		growth factor		1.702	bias	0.0135	CCR2,CDKN1A,CXCL8,CXCR4,FN1,IFNG,S100A8,S100A9,TIMP1
leukotriene B4		chemical - endogenous mammalian				0.0136	CXCL8,IL1B,IRF5
resolvin E1		chemical - endogenous mammalian				0.0136	CCL4,IFNG,IL1B
AHI1		other				0.0136	IL1RN,IL4I1,NKG7
CGAS		enzyme				0.0136	CDKN1A,CXCL8,IL1B
Trp53cor1		other				0.0136	CDKN1A,IL1B,PERP
RAG2		enzyme				0.0136	IFNG,IL1B,IL2RA
CXCL10		cytokine				0.0136	FOS,IFNG,IL1B
TICAM2		other				0.0136	CCL4,IL1B,S100A8
MTA3		transcription regulator				0.0136	FN1,KMT2E,SYK
ADAMTS12		peptidase				0.0136	LGALS1,S100A8,S100A9
TAF4B	7.874	transcription regulator				0.0136	FN1,SPP1,TAF4B
K-252		chemical drug				0.0136	CD14,CXCL8,SPP1
kaempferol		chemical toxicant				0.0136	CD69,CDK1,CDKN1A
E2F2		transcription regulator				0.0138	CCNB2,CDK1,CDKN1A,E2F1,MCM10
bexarotene		chemical drug		0.213	bias	0.0139	IL1B,IL2RA,ITPR1,MALAT1,MAP3K8,ODC1,PLAUR,S100A9,SMAD5
MEN1		transcription regulator		-0.391		0.014	CCNB2,CDKN1A,FOS,RORC
PROC		peptidase		-1.067	bias	0.014	CLU,CXCL8,F5,IL1B
ADRA1D		G-protein coupled receptor				0.014	CDK1,FN1,FOS,PRIM2
RPTOR		other		0.068	bias	0.0141	CCR7,CD86,DHCR24,ENO1,IL1B,IRF8
CD36		transmembrane receptor	Activated	2.392	bias	0.0141	CD86,CXCL8,IFNG,IL1B,PLAUR,SYK
TP63		transcription regulator	Activated	2.414	bias	0.0141	ATG4A,BST2,CDK1,CDKN1A,CXCL8,CXCR4,E2F1,FN1,FOS,IL1B,IL1RAP,IRF5,KIF23,MCM10,PERP,PIK3R3,S100A8
EGR2		transcription regulator		-0.053	bias	0.0141	CDKN1A,FOS,IFNG,IL1B,IL7R,LAG3,MIR17HG,RORC
WNT5A		cytokine		1.485		0.0143	CD14,CXCL8,CXCR4,FN1,IL1B,IRF8,SPP1
RNF31		enzyme		-0.277	bias	0.0146	CCL4,CXCL8,CXCR4,IL1B,IL1RN
LCK		kinase		1.461	bias	0.0146	CD69,CDK1,FOS,IFNG,IL2RA
bleomycin		biologic drug	Activated	2.765	bias	0.0148	CCR2,CD86,CDKN1A,CXCR4,FN1,IFNG,IL1B,SPP1,TIMP1
ITGA5		transmembrane receptor				0.015	CDKN1A,FOS,IL1B,PLAUR
MYBL2		transcription regulator		1.953	bias	0.015	CCNB2,CDK1,CLU,IFNG
2-bromoethylamine		chemical reagent		1.982	bias	0.015	CD14,CLU,SPP1,TIMP1
LRP1		transmembrane receptor		-1.927		0.015	CCL4,CD14,IL1B,PDGFRB
ARID1A		transcription regulator		-0.48		0.015	CCNB2,CDKN1A,CXCL8,IL1B
MYC		transcription regulator		0.725	bias	0.015	ABCD1,ABCE1,AMD1,CCNB2,CD69,CD86,CDK1,CDKN1A,CLU,CXCL8,E2F1,ENO1,FN1,FOS,GOT1,IFI27,IL1RAP,ITPR1,JARID2,LGALS1,MIR17HG,MTBP,MTFR2,ODC1,PDGFRB,PERP,PGK1,PHF21A,PLAUR,POLR1B,RHOB,SEPHS2,SPP1,TIMP1,TMEM97
UTP		chemical - endogenous mammalian				0.0151	CD14,LTA,SPP1
CD300LF		other				0.0151	CXCL8,IL1B,IL1RN
MAC		complex				0.0151	CD59,FN1,SPP1
AMH		growth factor				0.0151	CDKN1A,E2F1,SMAD5
LTF		peptidase				0.0151	CD86,CDKN1A,TK1
EPCAM		other				0.0151	ATF3,CDKN1A,FOS
PTPN22		phosphatase				0.0151	FOS,IL1B,LAG3
ceramide		chemical - endogenous mammalian				0.0151	CXCL8,FOS,IL1B
NR1I2		ligand-dependent nuclear receptor		0.206		0.0151	CDKN1A,CPOX,E2F1,ELOVL6,GOT1,IFNG,IL2RA,S100A8
PAX3		transcription regulator				0.0153	BST2,CDKN1A,CLU,CXCR4,EXOSC9,IL7R,NPC2,RHOB,SRGN
IGF1		growth factor	Activated	3.063	bias	0.0153	CCL4,CDK1,CDKN1A,CLU,CXCL8,CYBB,E2F1,EPAS1,FN1,FOS,IL1B,ODC1,PBK,PDGFRB,PLAUR,SPP1,TGFBI,TK1
6-mercaptopurine		chemical drug				0.0153	CCR7,CXCL8
O6-benzylguanine		chemical drug				0.0153	CCNB2,CDKN1A
PI3Kγ		group				0.0153	IFNG,IL1B
ATP6AP2		transporter				0.0153	CYBB,FN1
ABCA7		transporter				0.0153	CD14,IL1B
SMOC2		other				0.0153	CDK1,MCM10
DPY30		other				0.0153	CDKN1A,E2F1
L2HGDH		enzyme				0.0153	CCL4,CYBB
LGALS8		other				0.0153	CDKN1A,CXCL8
ITGA4		transmembrane receptor				0.0153	IL1B,IL1RN
PDK2		kinase				0.0153	IL1B,IRF8
MIR320		group				0.0153	E2F1,FN1
NCK1		kinase				0.0153	CD69,FOS
NCF4		enzyme				0.0153	IFNG,IL1B
SELE		transmembrane receptor				0.0153	FOS,IL1B
LUM		other				0.0153	CDKN1A,IL1B
PEA15		transporter				0.0153	PLD1,PLD2
alpha-santalol		chemical reagent				0.0153	CDK1,CDKN1A
KCNA3		ion channel				0.0153	IFNG,IL2RA
DBH		enzyme				0.0153	FOS,IFNG
PRKCH		kinase				0.0153	CDKN1A,KRT5
calmidazolium		chemical drug				0.0153	FN1,FOS
piroxicam		chemical drug				0.0153	CXCR4,IFNG
sodium dodecyl sulfate		chemical drug				0.0153	IFNG,IL1B
levamisole		chemical drug				0.0153	CDKN1A,CLU
cortistatin A		chemical reagent				0.0153	IRF8,JARID2
mesalamine		chemical drug				0.0153	HPGD,ODC1
tiron		chemical reagent				0.0153	CDKN1A,PLAUR
acitretin		chemical drug				0.0153	IFNG,ODC1
polymyxin B		biologic drug				0.0153	CXCL8,IL1B
gossypol		chemical drug				0.0153	ATF3,CXCL8
perilla alcohol		chemical drug				0.0153	CDKN1A,IL1B
C-miR146a		chemical reagent				0.0153	IL1B,TRAF3
NR1H2		ligand-dependent nuclear receptor		-1.067		0.0154	CCL4,CCR7,ELOVL6,IFNG,IL1B,IL1RN
NGF		growth factor		0.313	bias	0.0154	APOBEC3G,ATF3,CCL4,CCR7,CD86,CDK1,CDKN1A,EPAS1,FOS,PLAUR
TSC2		other		-0.13	bias	0.0154	ATF3,CDKN1A,CREG1,E2F1,FOS,IFNG,PDGFRB
NTRK2		kinase				0.0154	CDK1,CDKN1A,E2F1,FOS,SPP1
MEF2D		transcription regulator		1.119	bias	0.0154	BACH2,FN1,FOS,HDAC9,SYK
BRAF		kinase				0.0157	CCR2,CD86,CDK1,CDKN1A,CXCL8,EPAS1,IFNG,IL1B,SLC22A5
NOS3		enzyme				0.0161	ATF3,CD86,FN1,IFNG
CD86	5.365	transmembrane receptor		1.927	bias	0.0161	CCL4,CD69,CD86,IFNG
PRKAG3		other				0.0162	AMD1,C16orf70,ENOX2,GOT1,NRIP1,ODC1,RORC,STK11IP
Il3		cytokine		1.995		0.0162	CD14,CDKN1A,FOS,OSM,SPP1
decitabine		chemical drug		1.053	bias	0.0163	ABCE1,CCR2,CCR7,CD86,CDK1,CDKN1A,CLU,CXCR1,CXCR4,ELOVL6,FN1,HPGD,IFI27,IL1B,IL1RAP,IL7R,LGALS1,LIN9,PKN3,PON2,SLC43A1,SPP1,STK3,SYK,TGFBI
2-(4-acetoxyphenyl)-2-chloro-N-methylethylamine		chemical reagent				0.0167	CXCL8,IFNG,IL1B
Mir122a,b		group				0.0167	CD69,IFNG,IL1B
PRKAR2B		kinase				0.0167	CD40LG,CDK1,FOS
CARD11		kinase				0.0167	CCL4,IFNG,IL2RA
IND S7		chemical - kinase inhibitor				0.0167	ENO1,FH,PGK1
CCR1		G-protein coupled receptor				0.0167	FOS,IFNG,SPP1
CD47		transmembrane receptor				0.0167	IFNG,IL12RB2,IL1B
TAF6		transcription regulator				0.0167	ATF3,CDKN1A,MIR22HG
titanium dioxide		chemical drug				0.0167	CDKN1A,IFNG,IL1B
phorbol 12,13-didecanoate		chemical toxicant				0.0167	CDK1,CDKN1A,IL1RAP
TWIST1		transcription regulator		0.329	bias	0.0167	CDKN1A,CLU,CXCL8,FN1,FOS,IL1B,SPP1,TGFBI
RBL1		transcription regulator		-1.969	bias	0.0171	CDK1,CDKN1A,E2F1,FOS,MCM10
UCHL1		peptidase		0.555		0.0171	BACH2,CDKN1A,HDAC9,TBPL1,VWA5A
MAPK7		kinase		1.432	bias	0.0171	AACS,CXCL8,DHCR24,ELOVL6,IL1B
captopril		chemical drug		1.432		0.0171	CLU,GTPBP4,IL1RN,SPP1,TIMP1
TRPS1		transcription regulator		-1	bias	0.0172	CCNB2,CDK1,FN1,TPX2
IFN type 1		group				0.0172	BST2,CD69,CXCL8,IFNG
ROCK2		kinase				0.0172	CXCL8,RORC,S100A8,SPP1
MAP2K5		kinase		1	bias	0.0172	AACS,DHCR24,ELOVL6,FOS
candesartan		chemical drug		-1.982	bias	0.0172	FN1,FOS,PDGFRB,SPP1
9,10-dimethyl-1,2-benzanthracene		chemical toxicant				0.0172	CDKN1A,IL1B,S100A8,S100A9
NRG1		growth factor	Activated	2.768	bias	0.0175	CDKN1A,CXCL8,CXCR1,CXCR4,E2F1,FN1,FOS,NUP214,PLAUR,SHCBP1,TK1
IL22		cytokine		0.41	bias	0.0178	CCL4,CXCL8,HSP90AB1,IFNG,IL1B,S100A8,S100A9
5-N-ethylcarboxamido adenosine		chemical reagent		0.61		0.0182	BAG3,CXCL8,IFNG,IL1B,ODC1,RGS2
TNFSF12		cytokine	Activated	2.313		0.0182	ADAM12,CXCL8,IL1B,S100A8,S100A9,TIMP1
inosine		chemical - endogenous mammalian		0.762	bias	0.0183	IFNG,LGALS3BP,NPC2,TIMP1
TNFAIP3		enzyme		-1.954	bias	0.0183	CXCL8,IFNG,IL1B,TRAF3
BMPR2		kinase				0.0183	CXCL8,FN1,SPP1
CLEC7A		transmembrane receptor				0.0183	CCL4,CCR7,IL1B
ACTL6A		other				0.0183	CCNB2,CDKN1A,IFNG
DLL1		enzyme				0.0183	CD86,IFNG,RORC
ELF1		transcription regulator				0.0183	FCER1G,IFNG,IL2RA
NFIL3		transcription regulator				0.0183	CD40LG,CDKN1A,IFNG
MEL S3		chemical - kinase inhibitor				0.0183	ENO1,FH,PGK1
ACE2		peptidase				0.0183	FN1,IFNG,IL1B
chrysotile asbestos		chemical toxicant				0.0183	CCNB2,IL1B,TIMP1
stearic acid		chemical - endogenous mammalian				0.0183	ATF3,CLU,IL1B
dichlorovinylcysteine		chemical toxicant				0.0183	ENO1,ODC1,SLC27A2
IGF2		growth factor	Activated	2.164	bias	0.0184	CDK1,CDKN1A,CXCR4,ELOVL6,FN1,RHOB,SPP1,TGFBI
nitroglycerin		chemical drug				0.0185	CXCL8,PLAUR
IH636 grape seed proanthocyanidin extract		chemical drug				0.0185	IL1B,RORC
TASP1		peptidase				0.0185	CCNB2,CDKN1A
MSI2		other				0.0185	CDKN1A,FN1
AGO1		translation regulator				0.0185	CXCR4,NRIP1
TLR2/3/4/9		group				0.0185	CCR7,CD86
ABCA4		transporter				0.0185	CCL4,IFNG
LTB4R2		G-protein coupled receptor				0.0185	CXCL8,IRF5
PBRM1		other				0.0185	CDK1,CDKN1A
Traj18		other				0.0185	CD86,IFNG
Gcn5l		group				0.0185	CDKN1A,E2F1
TCF21		transcription regulator				0.0185	CDKN1A,TIMP1
VASP		other				0.0185	EPAS1,IL1B
RLIM		enzyme				0.0185	CDKN1A,FN1
PIAS2		transcription regulator				0.0185	CDKN1A,FOS
IL1R2		transmembrane receptor				0.0185	CXCL8,IL1B
APOH		transporter				0.0185	CD86,IFNG
KLRD1		transmembrane receptor				0.0185	IFNG,IL2RA
PIKFYVE		kinase				0.0185	ATF3,CD86
ST3-Hel2A-2		chemical reagent				0.0185	ATF3,FOS
CEBPG		transcription regulator				0.0185	CXCL8,IFNG
TNNI3		transporter				0.0185	CCL4,CCR2
OSTM1		other				0.0185	FOS,IRF8
IL18BP		other				0.0185	CXCL8,IFNG
IQGAP1		other				0.0185	CXCR4,IFNG
JMJD1C		enzyme				0.0185	CDKN1A,STYK1
NDFIP1		other				0.0185	IL1B,IL2RA
RASGRP1		other				0.0185	CD69,IFNG
TNFSF18		cytokine				0.0185	IFNG,IL2RA
oligomycin		chemical - endogenous non-mammalian				0.0185	IFNG,IL1B
sevoflurane		chemical drug				0.0185	FOS,IL1B
clioquinol		chemical drug				0.0185	CDKN1A,FOS
7-(4-fluorobenzylamino)-1,3,4,8-tetrahydropyrrolo[4,3,2-de]quinolin-8(1H)-one		chemical reagent				0.0185	CDK1,E2F1
enterolactone		chemical - endogenous mammalian				0.0185	IL1RN,SPP1
carmustine		chemical drug				0.0185	E2F1,HSP90AB1
Z-DEVD-FMK		chemical - protease inhibitor				0.0185	FCER1G,PLD1
theophylline		chemical drug				0.0185	CXCL8,FOS
scopolamine		chemical drug				0.0185	FOS,IL2RA
desmosterol		chemical - endogenous mammalian				0.0185	CXCR1,DHCR24
SFTPA1		transporter		-1.3	bias	0.0189	FOS,HSPA6,IL1B,IL2RA,RASD1
MAP3K7		kinase		0.424	bias	0.0189	CCR7,CD14,CXCL8,IL1B,RGS2
SREBF2		transcription regulator		0.44	bias	0.0189	AACS,CDKN1A,CXCL8,ELOVL6,TMEM97
CD24		other		0	bias	0.019	ATF3,CDKN1A,CXCL8,FOS,NRIP1,VPS13B
caffeic acid phenethyl ester		chemical drug		-0.7	bias	0.019	CDKN1A,CXCL8,E2F1,IL1B,PLD1,RHOB
IKBKG		kinase		1.998	bias	0.0191	CLU,CTSF,CXCL8,EPAS1,FOS,IL1B,IL1RN
diethylstilbestrol		chemical drug		1.657	bias	0.0193	CCNB2,CD14,CDKN1A,CLU,CYRIA,FOS,HSP90AB1,KRT5,LGALS1,PDGFRB,S100A8,TGFBI
sn-1,2-didecanoylglycerol		chemical - endogenous mammalian				0.0194	ODC1
acetoacetyl-coenzyme A		chemical - endogenous mammalian				0.0194	IL1B
beta-escin		chemical drug				0.0194	CDKN1A
Ulbp		group				0.0194	IFNG
cortodoxone		chemical - endogenous mammalian				0.0194	FN1
MRGPRX2		G-protein coupled receptor				0.0194	CCL4
GPSM3		other				0.0194	IL1B
charybdotoxin		chemical - endogenous non-mammalian				0.0194	IFNG
cyanuric acid		chemical reagent				0.0194	CXCL8
peptide YY 3-36		biologic drug				0.0194	FOS
PRR5		other				0.0194	PDGFRB
hydroxamic acid		chemical - other				0.0194	CXCR4
LTB4R/LTB4R2		group				0.0194	CXCL8
NDPK		group				0.0194	CXCL8
G protein alpha		group				0.0194	FOS
MKK3/6		group				0.0194	CXCL8
growth factor receptor		group				0.0194	FOS
IRAK1/4		group				0.0194	IL1B
davunetide		biologic drug				0.0194	CD69
CALHM6		other				0.0194	IFNG
ATP synthase		complex				0.0194	IFNG
etarotene		chemical reagent				0.0194	ODC1
PKR dimer		complex				0.0194	ATF3
IL12R		group				0.0194	IFNG
NF279		chemical reagent				0.0194	CXCL8
GSK 189254		chemical drug				0.0194	FOS
(-)-OSU 6162		chemical drug				0.0194	FOS
HCG11		other				0.0194	CDKN1A
LINC00475		other				0.0194	CDKN1A
pridopidine		chemical drug				0.0194	FOS
Il1bos		other				0.0194	IL1B
PELI3		enzyme				0.0194	IL1B
FENDRR		other				0.0194	FN1
SRF-ELK1		complex				0.0194	FOS
CMPK2		kinase				0.0194	IL1B
ARMC10		other				0.0194	CDKN1A
FKBPL		other				0.0194	CDKN1A
ZBTB7C		transcription regulator				0.0194	CDKN1A
KY		other				0.0194	IFNG
RND2		enzyme				0.0194	RHOB
FCN1		other				0.0194	CXCL8
DAGLA		enzyme				0.0194	IL1B
Ifngas1		other				0.0194	IFNG
LMAN1		other				0.0194	F5
canakinumab		biologic drug				0.0194	IL1B
PSTPIP2		other				0.0194	IL1B
EBF4		transcription regulator				0.0194	CDKN1A
PGLYRP4		transmembrane receptor				0.0194	IFNG
CXXC1		transcription regulator				0.0194	CDKN1A
ZNF580		transcription regulator				0.0194	CXCL8
ZBTB8A		other				0.0194	CDKN1A
AHCTF1		transcription regulator				0.0194	CETN2
ZG16B		other				0.0194	CXCR4
KCTD10		ion channel				0.0194	RHOB
CLIC1		ion channel				0.0194	IL1B
FGF14		growth factor				0.0194	FOS
PCLAF		other				0.0194	CDKN1A
rimantadine		chemical drug				0.0194	CXCL8
7-bromoindirubin-3'-oxime		chemical - kinase inhibitor				0.0194	CDKN1A
NNZ 2566		biologic drug				0.0194	ATF3
vasopressins		biologic drug				0.0194	FOS
inolitazone		chemical drug				0.0194	CDKN1A
mediator		complex				0.0194	FOS
Rho gdi		group				0.0194	RHOB
CIB1		other				0.0194	CDK1
ARHGEF17		other				0.0194	FOS
pidilizumab		biologic drug				0.0194	CXCR4
PTPRM		phosphatase				0.0194	CTNND1
TFB1M		transcription regulator				0.0194	E2F1
GPLD1		enzyme				0.0194	LGALS3BP
CABLES1		other				0.0194	CDKN1A
KIFAP3		other				0.0194	FOS
CDT1		other				0.0194	CDKN1A
NEK1		kinase				0.0194	RIPK1
CD96		other				0.0194	IFNG
TNIP2		other				0.0194	MAP3K8
PPY		other				0.0194	FOS
ACVR2B		kinase				0.0194	CDKN1A
KLRC3		transmembrane receptor				0.0194	IL2RA
GPHA2		other				0.0194	FOS
KSR2		kinase				0.0194	CXCL8
SNAP91		other				0.0194	BST2
MOS		kinase				0.0194	CDK1
miR-521 (miRNAs w/seed ACGCACU)		mature microRNA				0.0194	ERCC8
miR-523-3p (miRNAs w/seed AACGCGC)		mature microRNA				0.0194	CDKN1A
miR-331-5p (and other miRNAs w/seed UAGGUAU)		mature microRNA				0.0194	PLAUR
miR-330-3p (and other miRNAs w/seed CAAAGCA)		mature microRNA				0.0194	E2F1
mir-887		microRNA				0.0194	PLD2
MIR3619		microRNA				0.0194	PLD2
PPP2R5E		phosphatase				0.0194	FN1
MAOB		enzyme				0.0194	IL4I1
AQUAPORIN		group				0.0194	IL1B
NPVF		other				0.0194	FOS
ZBTB5		transcription regulator				0.0194	CDKN1A
DHX8		enzyme				0.0194	CDKN1A
ponatinib		chemical drug				0.0194	DHCR24
IPH 2101		biologic drug				0.0194	CD69
TNPO2		transporter				0.0194	CXCL8
RALY		transcription regulator				0.0194	E2F1
TYMP		growth factor				0.0194	CXCL8
SLC1A2		transporter				0.0194	FOS
GPHB5		other				0.0194	FOS
SCN7A		ion channel				0.0194	FOS
DNASE1L3		enzyme				0.0194	CDKN1A
SH2D1B		other				0.0194	IFNG
CCNI		other				0.0194	CDKN1A
BANF1		other				0.0194	S100A9
ANKS1A		other				0.0194	FOS
FXYD1		ion channel				0.0194	CDKN1A
HLA-DPB1		transmembrane receptor				0.0194	IFNG
GAD2		enzyme				0.0194	IFNG
DMAP1		transcription regulator				0.0194	TK1
Uox		enzyme				0.0194	IL1B
CLC		enzyme				0.0194	IL1B
ZNF184		transcription regulator				0.0194	S100A9
EPGN		growth factor				0.0194	FOS
TAX1BP3		transcription regulator				0.0194	FOS
ING3		other				0.0194	CDKN1A
ATP1B3		transporter				0.0194	BST2
SLC7A8		transporter				0.0194	IFNG
PTPRH		phosphatase				0.0194	CD69
RPS9		translation regulator				0.0194	CDK1
JADE1		transcription regulator				0.0194	CDKN1A
16:0 ceramide-1-phosphate		chemical - endogenous mammalian				0.0194	CXCL8
RAB5B		enzyme				0.0194	FOS
GRID2		ion channel				0.0194	CDK1
CD164		other				0.0194	CXCR4
cytarabine/filgrastim/fludarabine phosphate		biologic drug				0.0194	FOS
EMSLR		other				0.0194	E2F1
F12		peptidase				0.0194	IL1B
quercetin-3-methyl ether		chemical reagent				0.0194	IL1B
UBE2E1		enzyme				0.0194	CDKN1A
quercetin-3,4'-dimethyl ether		chemical reagent				0.0194	IL1B
tetramethylpyrazine		chemical - endogenous non-mammalian				0.0194	CXCR4
CUL9		other				0.0194	CDKN1A
PPP1CB		phosphatase				0.0194	E2F1
chemotherapy/tretinoin		chemical drug				0.0194	KAT2B
EXOSC10		kinase				0.0194	FOS
SCML2		transcription regulator				0.0194	CDKN1A
IFITM3		other				0.0194	SPP1
COPS2		other				0.0194	E2F1
Flt1		kinase				0.0194	ATF3
RANBP2		enzyme				0.0194	FN1
SPAG6		other				0.0194	SPAG16
TDP-665759		chemical reagent				0.0194	CDKN1A
CHP1		other				0.0194	SLC9A1
minozac free base		chemical drug				0.0194	IL1B
CXCR6		G-protein coupled receptor				0.0194	IFNG
STAT5 inhibitor II IQDMA		chemical reagent				0.0194	IFNG
Rhodobacter sphaeroides lipopolysaccharide		chemical - endogenous non-mammalian				0.0194	IL1B
phyllanthusmin C		chemical - endogenous non-mammalian				0.0194	IFNG
lirilumab		biologic drug				0.0194	CD69
PRN694		chemical - kinase inhibitor				0.0194	CD69
erteberel		chemical drug				0.0194	IL1B
lipophosphonoglycan		chemical - endogenous non-mammalian				0.0194	IL1B
beractant		chemical drug				0.0194	CXCL8
NBI 27914		chemical drug				0.0194	FOS
sorbinil		chemical drug				0.0194	E2F1
guanfacine		chemical drug				0.0194	FOS
ondansetron		chemical drug				0.0194	FOS
flurothyl		chemical drug				0.0194	FOS
pustulan		chemical reagent				0.0194	CXCL8
diisopropanolnitrosamine		chemical toxicant				0.0194	CDKN1A
L 733060		chemical reagent				0.0194	FOS
L-threo-safingol		chemical drug				0.0194	CXCL8
selfotel		chemical drug				0.0194	FOS
(R)-5-(2-azetidnylmethoxy)-2-chloropyridine		chemical drug				0.0194	FOS
TAK-779		chemical drug				0.0194	APOBEC3G
PD173955		chemical - kinase inhibitor				0.0194	PLAUR
BTG3-AS1		other				0.0194	ATF3
NSC 126405		chemical reagent				0.0194	CDKN1A
AZ10606120		chemical reagent				0.0194	CD86
aspergillus beta-glucan		chemical - endogenous non-mammalian				0.0194	CXCL8
pneumocystis beta-glucan		chemical - endogenous non-mammalian				0.0194	CXCL8
flunitrazepam		chemical drug				0.0194	CXCL8
tolrestat		chemical drug				0.0194	CXCL8
MUC2		other				0.0194	CXCL8
ONO-8711		chemical drug				0.0194	FOS
ATL146e		chemical drug				0.0194	IFNG
PBS-57		chemical reagent				0.0194	IFNG
PAR-1-specific peptide		chemical reagent				0.0194	OSM
terameprocol		chemical drug				0.0194	CDK1
potassium iodide		chemical drug				0.0194	CXCL8
SDM25N		chemical reagent				0.0194	CD86
CDD450		chemical drug				0.0194	IL1B
CTOP		chemical reagent				0.0194	FOS
leucyl-leucine-methyl ester		biologic drug				0.0194	IL1B
Ac-DEVD-CHO		chemical reagent				0.0194	FOS
ibutamoren		chemical drug				0.0194	FOS
LY 354740		chemical drug				0.0194	FOS
droxidopa		chemical drug				0.0194	FOS
N-oleoyldopamine		chemical - endogenous mammalian				0.0194	IL2RA
S(-)-carbidopa		chemical drug				0.0194	FOS
17S-hydroperoxy-docosahexaenoic acid		chemical - endogenous mammalian				0.0194	IL1B
UMP		chemical - endogenous mammalian				0.0194	IL1B
cladribine		chemical drug				0.0194	IL1B
poractant alfa		chemical drug				0.0194	CXCL8
sarcosine		chemical - endogenous mammalian				0.0194	FOS
miR-10a inhibitor		chemical reagent				0.0194	SKA1
D-phenylalanine		chemical - endogenous non-mammalian				0.0194	IFNG
lactulose		chemical - endogenous mammalian				0.0194	CXCL8
V2+		chemical toxicant				0.0194	CXCL8
BAX		transporter				0.0195	CDK1,CDKN1A,TIMP1,TRAF3
IGFBP2		other		-0.132	bias	0.0195	CHD9,ELOVL6,FN1,MALAT1
FHL2		transcription regulator		1		0.0195	CXCL8,IFNG,PDGFRB,SPP1
ADRB2		G-protein coupled receptor		0.762	bias	0.0195	CCR2,CD86,IFNG,SPP1
salicylic acid		chemical drug		-1.71	bias	0.0195	CCL4,CDK1,CXCL8,IL1B
KRAS		enzyme		0.053		0.0195	ATF3,BPNT2,CDKN1A,CLU,CXCL8,CYBB,E2F1,ENO1,FN1,FOS,IFNG,IL1B,NFYB,ODC1,PHLDB2,PLD1,PRC1,RHOB,SLC22A5,SLCO4A1,SPP1,TK1,TRIB1,TRIP13
MAPK8		kinase		1.396	bias	0.0196	CDKN1A,CXCL8,CYBB,FOS,IFNG,IL1B,IL2RA,PLAUR
IRF7		transcription regulator	Activated	2.63	bias	0.0196	APOBEC3G,CD69,IL4I1,IRF5,IRF8,MAP3K8,RIPK2,S100A8
RETNLB		other	Activated	2.236	bias	0.0199	CCR2,CD86,FN1,IL1B,TIMP1
Gsk3		group		-0.277	bias	0.0199	CXCL8,FOS,IFNG,IL1B,SPP1
indican		chemical - endogenous mammalian				0.0201	CDKN1A,CXCR4,IL1B
leucine		chemical - endogenous mammalian				0.0201	ATF3,CDKN1A,FOS
mir-135		microRNA				0.0201	IL1B,SMAD5,SPP1
GNAI2		enzyme				0.0201	CCR7,CXCR4,IFNG
trabectedin		chemical drug				0.0201	CDK1,CDKN1A,TK1
ferulic acid		chemical - endogenous non-mammalian				0.0201	CDKN1A,IL1B,TIMP1
urethane		chemical toxicant				0.0201	CDKN1A,E2F1,IL1B
plerixafor		chemical drug				0.0201	CXCR4,IFNG,PGK1
R-WIN 55,212		chemical reagent				0.0201	CXCL8,E2F1,IL1B
N(G)-monomethyl-D-arginine		chemical - endogenous mammalian				0.0201	FOS,IFNG,PLAUR
fucoidin		chemical reagent				0.0201	CDKN1A,CXCL8,IL1B
puromycin aminonucleoside		chemical reagent		1.664	bias	0.0206	CD14,CLU,CYBB,GTPBP4,SPP1,TIMP1
CD3 group		group		1.93	bias	0.0208	IFNG,IL1B,IL2RA,ODC1
NFKBIB		transcription regulator				0.0208	CD86,CXCL8,IFNG,IL1B
SAFB		other	Inhibited	-2	bias	0.0208	CXCL8,FOS,MAP3K8,S100A8
salirasib		chemical drug		-0.594	bias	0.0208	ATF3,LGALS1,PDGFRB,PGK1
TET2		enzyme		1.633	bias	0.0212	DCAF1,FN1,IL1B,PDGFRB,S100A8,SERAC1,TIMP1
ADRB		group		-1.195	bias	0.0212	AACS,ATF3,CDKN1A,E2F1,FOS,SLCO4A1,TRAF3
triamcinolone acetonide		chemical drug		-0.333		0.0215	ATF3,CAPG,FOS,PRF1,RGS2,SPP1,SRGN,TRIB1,ZNF343
GAST		other		1.408	bias	0.0219	FOS,HMGB2,IFNG,ODC1,PGK1
FLT1		kinase		0		0.0219	CDKN1A,DHCR24,EPAS1,FOS,UBE4B
ascorbic acid		chemical - endogenous mammalian		-0.271		0.0219	CCNB2,CD40LG,CDKN1A,CXCL8,SPP1
U46619		chemical reagent				0.0219	CDK1,CXCL8
clobetasol propionate		chemical drug				0.0219	CD86,IL2RA
icilin		chemical reagent				0.0219	CCL4,IL1B
TCIRG1		enzyme				0.0219	CD86,IFNG
CLEC1B		transmembrane receptor				0.0219	SPP1,SYK
SLC7A2		transporter				0.0219	CCL4,IL1B
LECT2		other				0.0219	IFNG,IL1B
ALOX12		enzyme				0.0219	FN1,IFNG
NELFB		other				0.0219	ATF3,CDKN1A
STAR		transporter				0.0219	CD86,SPP1
LILRB4		other				0.0219	IFNG,IL1B
SH3KBP1		other				0.0219	CD86,FN1
LGALS3BP	4.221	transmembrane receptor				0.0219	FN1,IFNG
PTGIR		G-protein coupled receptor				0.0219	IFNG,IL1B
DDB2		other				0.0219	CDKN1A,E2F1
CLCA2		ion channel				0.0219	CDKN1A,FN1
PDCD1LG2		enzyme				0.0219	CD40LG,IFNG
OGG1		enzyme				0.0219	IFNG,IL1B
USP4		peptidase				0.0219	CXCR4,RORC
FOXD3		transcription regulator				0.0219	CDKN1A,CXCR4
ARF6		transporter				0.0219	IL1B,RHOB
RNF216		enzyme				0.0219	RIPK1,TRAF3
PAWR		transcription regulator				0.0219	CDKN1A,IL2RA
MAS1		G-protein coupled receptor				0.0219	CYBB,IL1B
C9		other				0.0219	FN1,IL1B
RASGRF1		other				0.0219	FOS,RRAS
DOK1		kinase				0.0219	CD69,IL2RA
AIM2		other				0.0219	IFNG,IL1B
BEX2		other				0.0219	SPP1,SWAP70
LY-2510924		biologic drug				0.0219	CD14,CD300A
sanglifehrin A		chemical reagent				0.0219	CDKN1A,IFNG
putrescine		chemical - endogenous mammalian				0.0219	CDKN1A,FOS
tetrathiomolybdate		chemical drug				0.0219	IL2RA,TIMP1
8-oxo-7-hydrodeoxyguanosine		chemical - endogenous mammalian				0.0219	CXCL8,IFNG
anakinra		biologic drug				0.0219	CCL4,IL1B,VWA5A
VAV1		transcription regulator				0.0219	CD69,FOS,IFNG
CNOT7		transcription regulator				0.0219	BST2,IFI27,LGALS3BP
KNG1		other				0.0219	CXCL8,FOS,IL1B
ACKR3		G-protein coupled receptor				0.0219	CDKN1A,CXCR4,RRAS
IDR-1002		chemical reagent				0.0219	CCL4,CXCL8,CXCR1
KRT17		other				0.0219	CCL4,IL1B,SPP1
fluvoxamine		chemical drug				0.0219	CCR7,CXCR1,FOS
clodronic acid		chemical drug				0.0219	CD86,FOS,IL1B
ramipril		chemical drug				0.0219	FN1,IFNG,TIMP1
proteasome inhibitor PSI		chemical - protease inhibitor				0.0219	CCL4,MCM10,SYK
MOG		other		1.095	bias	0.0221	CCR2,CD86,IFNG,SPAG16
enalapril		biologic drug		1		0.0221	CLU,GTPBP4,SPP1,TIMP1
carboplatin		chemical drug		0.762	bias	0.0221	CLU,GTPBP4,SPP1,TIMP1
DNMT3B		enzyme		-1.387	bias	0.0221	ABCD1,CDK1,CDKN1A,EPDR1,HDAC9,IFI27,IRF5,PSEN2
ERN1		kinase		1.796	bias	0.0227	ATF3,FN1,GOT1,IL1B,TENM1,WARS1,WFS1
2-amino-5-phosphonovaleric acid		chemical - other		-0.547		0.0227	ARMCX6,FBXO33,FOS,HDAC9,RGS2,SLC25A29,ZNF605
YAP1		transcription regulator		1.289	bias	0.0227	CDK1,CDKN1A,CXCL8,DIAPH3,E2F1,FN1,FOS,GINS1,IL1B,KIF23,TK1
TRAF2		enzyme		0.966		0.0229	CDK1,CXCL8,IFNG,RIPK1,TK1
GNA15		enzyme				0.0231	CD69,CXCL8,IL1RN,ODC1,RGS2,TIMP1
TERT		enzyme		0.277		0.0235	ATF3,CDKN1A,CXCL8,IL1B,MGME1,SPP1,TK1
quercetin		chemical drug		-0.647		0.0235	CXCL8,FOS,IL1B,ODC1,PLAUR,PLD1,PON2
Stat3-Stat3		complex				0.0239	CDKN1A,LTA,RORC
RNASEL		enzyme				0.0239	CDKN1A,CTNND1,IL1B
deferasirox		chemical drug				0.0239	CD300A,FOS,MS4A6A
PRKG1		kinase				0.0239	CDKN1A,FN1,FOS
TRB		transmembrane receptor				0.0239	CDKN1A,IFNG,IL2RA
irbesartan		chemical drug				0.0239	CYBB,FOS,IL1B
hymecromone		chemical drug				0.0239	CXCL8,CXCR1,CXCR4
CNR1		G-protein coupled receptor	Activated	2.213	bias	0.0243	CCNB2,CDK1,FOS,IFNG,PDGFRB,PLD1,TIMP1
ciprofibrate		chemical drug		-0.378		0.0243	AIG1,CPOX,GOT1,IL1RAP,LGALS3BP,NPC2,QPCT
bicuculline		chemical - endogenous non-mammalian		1.176	bias	0.0248	ATF3,FBXO33,FOS,ZDHHC9
ADIPOQ		other		-0.455		0.0249	CDKN1A,CXCL8,CYBB,FN1,FOS,IFNG,SLC27A2,TIMP1
L-glutamic acid		chemical - endogenous mammalian	Activated	2.356	bias	0.025	BAG3,CDKN1A,CETN2,FOS,IL1B,TIMP1
ERBB3		kinase		0		0.025	CDKN1A,CLU,CXCR4,FN1,RRAS,TK1
KIT		transmembrane receptor				0.025	CCR2,CXCR4,IFNG,IL2RA,OSM,SPP1
CDH1		other		-1.004		0.0251	CTNND1,FN1,IFI27,IFNG,PLAUR
MYCN		transcription regulator		0.329		0.0255	ABCD1,ABCE1,CDKN1A,CLU,E2F1,FN1,HSP90AB1,JARID2,LGALS1,MIR17HG,ODC1
HRAS		enzyme		1.575		0.0255	CAPG,CD69,CDK1,CDKN1A,CLU,CXCL8,E2F1,EIF2D,FN1,FOS,IL1B,IL7R,MAP3K8,MGME1,OSM,PDGFRB,PIP5K1A,PLAUR,RHOB,SPP1,TK1
WP1066		chemical drug				0.0255	CD86,IL1B
CLEC10A		other				0.0255	IFNG,IL1B
SRT1720		chemical drug				0.0255	CXCL8,IL1B
PDGFRB	7.333	kinase				0.0255	OSM,PDGFRB
PPP3CB		phosphatase				0.0255	CDKN1A,CYBB
PTGDR		G-protein coupled receptor				0.0255	IFNG,IL1B
CCL21		cytokine				0.0255	CXCL8,IFNG
TLE1		transcription regulator				0.0255	ATF3,FOS
HLA-A		other				0.0255	IFNG,LAG3
FSTL1		other				0.0255	IL1B,OSM
CRY2		enzyme				0.0255	FOS,IL1B
RPS6KA4		kinase				0.0255	FOS,IL2RA
NLRC4		other				0.0255	CD86,IL1B
B4GALNT1		enzyme				0.0255	FOS,IL1B
MMP8		peptidase				0.0255	CXCL8,S100A8
TIGIT		other				0.0255	IFNG,RORC
PLA2G2E		enzyme				0.0255	IL1B,S100A9
RPL22		translation regulator				0.0255	ATF3,CDKN1A
CRY1		enzyme				0.0255	FOS,IL1B
SIRPA		phosphatase				0.0255	CXCL8,IL1B
vatalanib		chemical drug				0.0255	CDKN1A,TIMP1
iodoacetic acid		chemical toxicant				0.0255	ATF3,IL1B
meloxicam		chemical drug				0.0255	CDKN1A,HPGD
hydroquinone		chemical - endogenous mammalian				0.0255	FOS,IL1B
Complement		complex				0.0255	CLU,PDGFRB
N,N-dimethylsphingosine		chemical reagent				0.0255	FN1,FOS
astressin 2B		biologic drug				0.0255	FOS,HPGD
poly-L-lysine		chemical reagent				0.0255	CXCL8,IL1RN
verteporfin		chemical drug				0.0255	CDKN1A,FN1
thermozymocidin		chemical reagent				0.0255	CD86,IL1B
adefovir dipivoxil		chemical drug				0.0255	FN1,TIMP1
isatoribine		chemical reagent				0.0255	CD86,IFNG
cyclomaltodextrin		chemical drug				0.0255	IL1B,S100A8
BMS-690514		chemical drug				0.0259	CDK1,CTSF,MCM10
3M-011		chemical reagent				0.0259	CCL4,CD86,CXCL8
ALOX15		enzyme				0.0259	FN1,IL1B,RGS2
ZBTB7A		transcription regulator				0.0259	CDKN1A,FOS,IL2RA
MARK2		kinase				0.0259	IFNG,LTA,SLCO3A1
GDF11		growth factor				0.0259	FOS,SMAD5,SPP1
honokiol		chemical - endogenous non-mammalian				0.0259	CDKN1A,FOS,MAP3K8
IL6R		transmembrane receptor	Activated	2.177	bias	0.0262	CDKN1A,CXCL8,FN1,IL1B,TIMP1
trichloroethylene		chemical toxicant		0		0.0262	DHCR24,PLD1,RHOB,SOS2
PIM1		kinase		1.131	bias	0.0262	CDKN1A,IFNG,IL12RB2,IL2RA
LTA	5.483	cytokine		1.949	bias	0.0262	IFNG,IL1B,LTA,ODC1
APOA1		transporter		-1.929	bias	0.0262	ATF3,CCR2,CYBB,IL1B
IKZF1		transcription regulator		-1.18	bias	0.0262	ANKFY1,CCL4,CDKN1A,CTNND1,FN1,IFI27,IFNG,IL7R,KIF23,ZDHHC9
Tlr		group		1.83	bias	0.0269	CCL4,CCR7,CD86,CXCL8,IFNG,IL1B
BHLHE40		transcription regulator		0.377		0.0269	C15orf48,CD86,IFNG,IL12RB2,IL2RA,TXK
GH1		growth factor		1.709		0.0269	ATF3,CLU,CXCR4,FN1,FOS,SPP1
melatonin		chemical - endogenous mammalian		0.447		0.0269	CDKN1A,CXCL8,FOS,IL1B,SPP1,STS
IL7R	-1.505	transmembrane receptor		-1	bias	0.0274	CCR7,CXCL8,CYRIA,IFNG,IL2RA
halofuginone		chemical drug				0.0276	AACS,CPQ,GOT1,LGALS1,LGALS3BP,SPP1,TIMP1
1810019D21Rik		other		-1	bias	0.0277	CDKN1A,F5,S100A8,STYK1
GPER1		G-protein coupled receptor		1.903	bias	0.0277	ATF3,CDKN1A,FOS,RASD1
HSP90B1		other		1.934	bias	0.0277	CD86,FANCC,IFNG,IL1B
PRKCB		kinase		1.969	bias	0.0277	CD86,CDKN1A,FN1,FOS
RB1		transcription regulator		-1.366		0.0278	CDK1,CDKN1A,CERT1,CMAS,CXCL8,E2F1,FBXO5,FN1,FOS,HMGB2,KRT5,MCM10,PSEN2,RECQL4,STK3,TMEM97
RAB1B		other				0.028	COPZ2,CXCL8,GEM
ABCB4		transporter				0.028	PDGFRB,SPP1,TIMP1
SKP2		other				0.028	CDKN1A,E2F1,ODC1
GAB2		other				0.028	CCL4,CD69,FOS
ARRB1	7.124	other				0.028	CXCL8,IL1B,SPP1
TIMP1	3.869	cytokine				0.028	CDKN1A,IFNG,PLAUR
PBX1		transcription regulator				0.028	AMD1,CDKN1A,CYBB
EWSR1		other				0.028	CDK1,FOS,PBK
MEIS1		transcription regulator				0.028	CDKN1A,CHD9,FOS
LOC105372576		other				0.028	E2F1,FOS,NUF2
green tea polyphenol		chemical drug				0.028	CDKN1A,FOS,IL1B
4-(2-aminoethyl)benzenesulfonylfluoride		chemical - protease inhibitor				0.028	CDKN1A,CXCL8,FN1
SBDS		other				0.0286	EPDR1,FOS,HSP90AB1,HSPA6,SPP1
ESRRA		ligand-dependent nuclear receptor	Activated	2.169	bias	0.0287	CASC3,CCR7,ENO1,EPAS1,FBXL20,GOT1,NRIP1,SPP1
BDNF		growth factor		1.576	bias	0.0288	BAG3,CDKN1A,CXCR4,CYRIA,ELOVL6,FOS,ITPR1,LGALS1,MALAT1,S100A9,SPP1,TRAF3
TCF7L2		transcription regulator		1.792	bias	0.0288	CDKN1A,DHCR24,EPAS1,FH,IL1RAP,KAT2B,MAL,NPC2,PLEKHG1,SLC27A2,SPP1,ZDHHC9
estrogen receptor		group		-1		0.0288	CAPG,CD59,CXCL8,CXCR4,FN1,FOS,NRIP1,PLAUR,RGS2,TIMP1
DDIT3		transcription regulator		1.213		0.0289	ATF3,CXCL8,FN1,IFNG,IL1B,WARS1
NOTCH3		transcription regulator		1.682	bias	0.0293	CDKN1A,EPAS1,FN1,PDGFRB
PTGES		enzyme				0.0293	CDKN1A,CYBB,IFNG,IL1B
phenylbutazone		chemical drug		0.927	bias	0.0293	CLU,GTPBP4,SPP1,TIMP1
ginsenoside Rb1		chemical - endogenous non-mammalian				0.0294	CXCL8,FOS
Serpin		group				0.0294	IFNG,IL1B
chondroitin sulfate A		chemical - endogenous mammalian				0.0294	IFNG,TIMP1
Ginkgo biloba		chemical drug				0.0294	CCL4,IL1B
dihydroartemisinin		chemical drug				0.0294	CDKN1A,E2F1
mocetinostat		chemical drug				0.0294	DISC1,IL1B
belnacasan		chemical drug				0.0294	IFNG,IL1B
Ptprd		phosphatase				0.0294	CDK1,CDKN1A
FFAR4		G-protein coupled receptor				0.0294	CXCL8,IL1B
IFNA17		cytokine				0.0294	CD86,IFNG
NFKBID		transcription regulator				0.0294	CD86,IFNG
TRAF3IP3		other				0.0294	IFNG,IL1B
FH	4.435	enzyme				0.0294	AATF,CDKN1A
elastase		group				0.0294	CXCR1,IL1B
COL9A1		other				0.0294	FN1,TGFBI
APOA4		transporter				0.0294	FOS,IFNG
NDUFA13		enzyme				0.0294	CDK1,TK1
miR-196a-5p (and other miRNAs w/seed AGGUAGU)		mature microRNA				0.0294	KRT5,S100A9
RLN2		other				0.0294	FOS,TIMP1
SRSF3		other				0.0294	CXCL8,E2F1
GADD45B		other				0.0294	CDKN1A,IFNG
CSF3R		transmembrane receptor				0.0294	CD14,FOS
RIPK3		kinase				0.0294	IFNG,IL1B
RGCC		other				0.0294	FN1,IL1B
RBP3		transporter				0.0294	IFNG,RIPK1
CCL19		cytokine				0.0294	CCR7,IFNG
RALA		enzyme				0.0294	CDKN1A,PLAUR
HNRNPD		transcription regulator				0.0294	CDKN1A,FOS
HAVCR1		other				0.0294	IFNG,IL2RA
ID4		transcription regulator				0.0294	CDKN1A,E2F1
2'3'-cyclic guanosine monophosphate-adenosine monophosphate		chemical - endogenous mammalian				0.0294	CD86,IL1B
dimethyl fumarate		chemical drug				0.0294	CCR7,IFNG
methoxsalen		chemical drug				0.0294	IFNG,RORC
carbonyl cyanide p-(trifluoromethoxy)phenylhydrazone		chemical reagent				0.0294	IFNG,ITPR1
diacylglycerol		chemical - endogenous mammalian				0.0294	IL2RA,ODC1
N-acetylglucosamine		chemical - endogenous mammalian				0.0294	IFNG,RORC
MAX		transcription regulator				0.0298	CDKN1A,E2F1,JARID2,ODC1,PDGFRB
CBFB		transcription regulator		-1		0.0298	CD160,IL2RA,LGALS3BP,SPP1,TNFRSF4
mir-29		microRNA		-1.929	bias	0.0298	ADAM12,CTNND1,FN1,IL2RA,PDGFRB
TGFBR1		kinase		1	bias	0.0298	CCR7,CD86,CDKN1A,FN1,TGFBI
niacinamide		chemical - endogenous mammalian		-1.387		0.0298	CD14,CDKN1A,CXCL8,E2F1,NFYB
TGFB3		growth factor		1.973	bias	0.0299	ADAM12,CD59,CDKN1A,FN1,FOS,PLAUR
ZC3H12A		enzyme				0.0302	IFNG,IL1B,TNFRSF4
CYBB	7.5	enzyme				0.0302	CYBB,IFNG,IL1B
PAK1		kinase				0.0302	CDKN1A,CTNND1,FN1
PIK3CD		kinase				0.0302	CCL4,CXCL8,IFNG
FUS-DDIT3		fusion gene/product				0.0302	CXCL8,FN1,IL1B
indole-3-carbinol		chemical drug				0.0302	CDKN1A,FOS,SPP1
andrographolide		chemical drug				0.0302	FN1,IL1B,TIMP1
naringenin		chemical - endogenous non-mammalian				0.0302	CCL4,CXCL8,IFNG
RBPJ		transcription regulator		-0.882	bias	0.0303	CDKN1A,ECT2,FOS,IL1B,IL7R,IRF8,RORC
STUB1		enzyme		-1.103	bias	0.0308	CDK1,CDKN1A,KDM3A,RIPK1
HIC1		transcription regulator	Activated	2		0.0308	CDKN1A,ITPR1,SPP1,SRGN
AMPK		complex		-0.378		0.031	AACS,CDKN1A,CXCL8,CYBB,IFNG,IL1RN
GSK3B		kinase		1.561		0.031	CDKN1A,CXCL8,FOS,IFNG,IL1B,SPP1
H89		chemical - kinase inhibitor	Inhibited	-2.398	bias	0.0312	CD14,CDKN1A,CXCL8,FOS,IL1B,PLD1,S100A8
Ifn		group		1.982	bias	0.0321	CD69,CD86,FOS,IRF8,S100A8,SPP1
TRAP1		enzyme		0.447		0.0324	E2F1,ERCC8,SLC35D1,SYK,TMA16
nocodazole		chemical reagent		1.518		0.0324	CDK1,CDKN1A,FOS,MAP3K8,STK3
8-bromoguanosine 3',5'-cyclic monophosphate		chemical - kinase inhibitor				0.0324	CDKN1A,FOS,PLAUR
TFDP1		transcription regulator				0.0324	CDK1,CDKN1A,E2F1
HSPG2		enzyme				0.0324	ATG4A,CXCR4,DRAM1
SIRT6		enzyme				0.0325	AACS,CXCL8,ELOVL6,IL1B
SCD		enzyme				0.0325	ATF3,CXCL8,IFNG,IL1B
NFE2L2		transcription regulator		0.904	bias	0.0331	ATF3,CCL4,CD86,CDKN1A,CREG1,CXCL8,CYBB,EPAS1,FN1,GOT1,HSP90AB1,IFNG,IL1B,IL1RN,SRGN
cetuximab		biologic drug				0.0335	FN1,PLAUR
TAP1		transporter				0.0335	CXCL8,IL1B
ZBTB33		transcription regulator				0.0335	CDKN1A,PGK1
CDH2		other				0.0335	CDKN1A,CTNND1
NUP62		transporter				0.0335	CDKN1A,PERP
PNN		other				0.0335	CDKN1A,TIMP1
CD83		transmembrane receptor				0.0335	CD86,IFNG
GHRHR		G-protein coupled receptor				0.0335	FOS,IL1B
CD209		other				0.0335	CCL4,CD86
SPHK2		kinase				0.0335	CDKN1A,IFNG
TNFAIP2		other				0.0335	LTA,SLCO3A1
NRP1		transmembrane receptor				0.0335	CD86,IL1B
GNA13		enzyme				0.0335	CXCL8,FOS
SP2		transcription regulator				0.0335	CDKN1A,FOS
GTF2I		transcription regulator				0.0335	CDKN1A,FOS
EDNRA		transmembrane receptor				0.0335	FOS,TIMP1
PDE5A		enzyme				0.0335	IL1B,S100A9
FITC		chemical reagent				0.0335	CD86,IFNG
L-685,458		chemical - protease inhibitor				0.0335	GZMB,IFNG
dexmedetomidine		chemical drug				0.0335	CXCL8,FOS
1,10-phenanthroline		chemical toxicant				0.0335	CDKN1A,CXCR1
N-ethyl-N-nitrosourea		chemical toxicant				0.0335	CDKN1A,SPP1
N-carbobenzyloxy-leucine-leucine-norvalinal		chemical - protease inhibitor				0.0335	CXCL8,EPAS1
asiatic acid		chemical reagent				0.0335	CDK1,CDKN1A
deguelin		chemical drug				0.0335	CDKN1A,CXCL8
lauric acid		chemical - endogenous mammalian				0.0335	CD86,CXCL8
U18666A		chemical reagent				0.0335	DHCR24,S100A8
CALC		group				0.0335	CD86,FOS
L-triiodothyronine		chemical - endogenous mammalian		0.617	bias	0.0336	AMD1,ATP8B4,CDKN1A,CLU,E2F1,EPAS1,FH,FOS,IL4I1,ITPR1,ODC1,PGK1,RGS2,SLC9A1,TAF4B,TK1,UMPS
PRKCD		kinase	Activated	2.202	bias	0.0337	CDKN1A,CXCL8,FOS,GEM,HJURP,IL1B,IL1RN,ODC1
metformin		chemical drug		-1.344		0.0337	ATF3,CCR7,CXCL8,FN1,FOS,IFNG,IL1B,IL1RN
DNMT1		enzyme		-1.969	bias	0.0337	CDK1,CDKN1A,EPDR1,IFNG,PRF1
6-hydroxydopamine		chemical toxicant		0.927	bias	0.0337	CYBB,FOS,HSP90AB1,IFNG,IL1B
STING1		other		1.969	bias	0.0342	C15orf48,CD86,CXCL8,IL1B
OSMR		transmembrane receptor				0.0342	C15orf48,FOS,OSM,TIMP1
IL25		cytokine		0.317	bias	0.0342	CXCL8,IFNG,IL1B,IL2RA
NPM1		transcription regulator				0.0348	CCL4,E2F1,IFNG
PLP1		other				0.0348	ATF3,IFNG,TIMP1
PIAS1		transcription regulator				0.0348	CDK1,CDKN1A,CXCL8
GNB2		enzyme				0.0348	CCL4,CDKN1A,IL1B
ARRB2		other				0.0348	ARRB1,CCR2,IL1B
FOSB		transcription regulator				0.0348	FOS,HPGD,TIMP1
sphingosine-1-phosphate		chemical - endogenous mammalian		1.273	bias	0.0351	CXCL8,FN1,FOS,IFNG,TIMP1
E2f		group				0.0355	CDK1,E2F1,EPAS1,MCM10,MIR17HG,TPX2
FOXO3		transcription regulator		0.119		0.0356	CCNB2,CDKN1A,CXCL8,CXCR4,EXO1,FBXO5,FN1,FOS,IFNG,PBK,SKA1,TPX2
8-bromo-cAMP		chemical reagent		1.855	bias	0.0359	CCNB2,CDK1,CDKN1A,CLU,DIAPH3,E2F1,FN1,FOS,HPGD,IL1B,IL7R,NFYB,ODC1,P4HA2,SPP1,TIMP1
CD247		transmembrane receptor		0.235	bias	0.0359	FCER1G,IFNG,ITPR1,QPCT
Sn50 peptide		chemical toxicant		-1.996	bias	0.0359	CXCL8,GZMB,IFNG,IL1B
PDX1		transcription regulator		0.478		0.0364	ARL4D,ATF3,CXCR4,FH,GOT1,IL1B,SPP1,WFS1
miR-291a-3p (and other miRNAs w/seed AAGUGCU)		mature microRNA	Inhibited	-2.224	bias	0.0365	CDKN1A,E2F1,KIF23,PBK,PRC1
desmopressin		biologic drug				0.0365	CAPG,DISC1,ENO1,FOS,PHLDB2
RUNX2		transcription regulator		1.128	bias	0.0367	CCR2,CDKN1A,CXCL8,FN1,SPP1,TIMP1
reactive oxygen species		chemical toxicant	Activated	2.437	bias	0.0367	CDKN1A,CXCL8,CXCR4,GZMB,IL1B,PRF1
OGA		enzyme		0.153		0.0369	APOBEC3G,CD14,CD86,CDKN1A,CXCL8,FN1,GNE,HPGD,HSP90AB1,MAMLD1,PRF1,RHOB,TGFBI,TIMP1
[truncated: 397 more rows]
