# Supplementary material for: Immunomodulatory effects of PI3Kδ inhibition in solid tumors – evaluation in a randomized phase II trial
Source: Research Square preprint supplement (doi:10.21203/rs.3.rs-337290/v1), 2021-03-19
Supplement: Supplementary file 8 [file 6a6e6c4700aba99ca99480a1.xlsx]

## Sheet: Clinical summary
Patient ID	Diagnosis (squamous cell carcinoma (SSC))	Tumour site (sub site)	tumour stage (T1-4)	nodal stage (N1-3)	Age	Gender	Prior Treatment	Treatment
240100	moderate to poorly differentiated SSC	Oropharynx (pharyngeal wall)	2	0	67	Male	no	Placebo
240200	moderately differentiated SSC	Oropharynx (tonsil)	1	2	39	Male	no	AMG-319 (400mg)
240300	invasive well differentiated keratinising SSC	Oral cavity (tongue)	1	0	54	Female	no	AMG-319 (400mg)
240400	poorly differentiated SSC	Hypopharynx (pyriform fossa)	3	0	68	Female	no	Placebo
240500	invasive SSC	Oral cavity (tongue)	2	2	69	Male	no	AMG-319 (400mg)
240600	SSC	Oral cavity (tongue)	1	0	59	Male	no	AMG-319 (400mg)
240700	moderately differentiated SSC	Hypopharynx (pyriform fossa)	1	1	68	Male	no	AMG-319 (400mg)
240900	SSC	Oral cavity (tongue)	2	0	55	Male	no
241000	moderate to poorly differentiated SSC	Hypopharynx (pyriform fossa)	3	0	71	Male	no	AMG-319 (400mg)
241100	poorly differentiated SSC	Oral cavity (tongue)	1	0	71	Male	no	Placebo
241200	moderately differentiated SSC	Oral cavity (mandible)	4	2	63	Female	no	AMG-319 (400mg)
241300	moderately differentiated SSC	Oral cavity (tongue)	2	2	54	Female	no	AMG-319 (400mg)
241500	moderately differentiated non keratinised SSC	Oral cavity (maxilla)	4	0	65	Female	no	AMG-319 (400mg)
241600	moderately differentiated non keratinised SSC	Oropharnyx (tonsil)	2	0	76	Male	no	Placebo
241700	SSC	Oral cavity (tongue)	2	0	53	Male	no	AMG-319 (400mg)
241800	invasive SSC	Oral cavity (tongue, floor of mouth)	1	0	71	Female	no	AMG-319 (400mg)
241900	invasive SSC	Oral cavity (floor of mouth)	1	2	58	Male	no	Placebo
242000	SSC	Oral cavity (retro molar/oropharynx)	2	0	68	Male	no	AMG-319 (400mg)
242100	SSC	Oral cavity (floor of mouth)	2	1	54	Male	no	Placebo
242200	SSC	Oral cavity (tongue)	1	0	74	Male	no	AMG-319 (400mg)
242400	SSC	Hypopharynx (pyriform fossa)	4	2	66	Male	no
242500	SSC	Oral cavity (floor of mouth, tongue)	4	0	55	Male	no	Placebo
242600	SSC	Oral cavity (buccal mucosa)	1	1	53	Female	no	AMG-319 (400mg)
242700	SSC	Oral cavity (tongue)	2	0	76	Female	no	AMG-319 (400mg)
242800	moderately differentiated SSC	Oropharynx (soft palate)	2	2	73	Male	no	Placebo
242900	moderately differentiated SSC	Oral cavity (tongue)	2	0	65	Female	Surgery: tumour resection, left mandibular alvelus (2014)	AMG-319 (300mg)
243000	moderately differentiated SSC	Oral cavity (mandibular alveolus)	4	0	71	Male	no	AMG-319 (300mg)
243100	moderately differentiated SSC	Oral cavity (tongue)	1	0	71	Male	no	Placebo
243200	moderately differentiated SSC	Oral cavity (tongue)	1	0	34	Female	no	AMG-319 (300mg)
243300	poorly differentiated SSC	Oropharynx (pharyngeal wall)	2	0	73	Male	Surgery: excision of lesions on left tongue (2014) and left ventral tongue (2015). Radiotherapy: T2N0M0 hypopharynx (2013). Chemotherapy: cipslatin (2013)	AMG-319 (300mg)
243400	focally keratinised moderately differentiated SSC	Oral cavity (maxillary mucosa to lip)	4	1	47	Male	no	AMG-319 (300mg)
243500	focally keratinised moderately differentiated SSC	Oral cavity (tongue)	2	1	59	Female	no	AMG-319 (300mg)

## Sheet: immune related Adverse Events
	Drug 400mg			Drug 300mg			Placebo
Common tocicity Criteria immune related Adverse event (irAE) grade	1	2	3/4	1	2	3/4	1	2	3/4	% of total events for all patients
Fever/Pyrexia
Number of patients	3	3	0	1	0	1	1	0	0
Number of events	4	3	0	1	0	1	1	0	0
% total events	7.69231			2.1978			1.0989			10.989
Skin rashes
Number of patients	6	3	7	0	2	2	3	1	0
Number of events	7	3	8	0	2	2	3	1	0
% total events	19.7802			4.3956			4.3956			28.5714
Diarrhoea/Colitis/Abdominal pain
Number of patients	7	3	5	3	2	2	1	0	0
Number of events	10	3	5	3	2	2	1	0	0
% total events	19.7802			7.69231			1.0989			28.5714
Flu like symptoms
Number of patients	3	5	0	1	2	0	0	0	0
Number of events	3	5	0	1	2	0	0	0	0
% total events	8.79121			3.2967			0			12.0879
Immune mediated disorder
Number of patients	0	0	1	0	0	0	0	0	0
Number of events	0	0	1	0	0	0	0	0	0
% total events	1.0989			0			0			1.0989
Liver Enzymes
ALT
Number of patients	0	3	3	1	1	0	0	0	0
Number of events	0	3	3	1	1	0	0	0	0
ALP
Number of patients	1	0	0	0	1	0	0	0	0
Number of events	1	0	0	0	1	0	0	0	0
AST
Number of patients	0	2	1	0	0	0	0	0	0
Number of events	0	2	1	0	0	0	0	0	0
% total events	10.989			3.2967			0			14.2857
Blood
WBC
Number of patients	0	0	1	0	0	0	0	0	0
Number of events	0	0	1	0	0	0	0	0	0
Platelets
Number of patients	2	1	0	0	0	0	0	0	0
Number of events	2	1	0	0	0	0	0	0	0
% total events	4.3956			0			0			4.3956
number of patients affected	22	20	18	6	8	5	5	1	0
Total events by grade	27	20	19	6	8	5	5	1	0
Total events			66			19			6

## Sheet: PK and pAkt
Patient	Treatment	Plasma AMG 319 conc. ng/ml			Number of doses	% of doses	Dosage days
		Day 8	Day 15	Day 22					Difference in AUC day 1/8 (pre to 4hrs post)	Difference in AUC day 15 (pre to 4hrs post)	Overall Result
63/001	Placebo	<LOD	<LOD	<LOD	26	100	1-26		4.72137	-16.9286	No response
63/002	AMG-319 (400mg)	87.8	50.8	160	21	100	1-21		-80.1859	-62.0971	Response
63/003	AMG-319 (400mg)	102	1.41	<LOD	12	44	1-11, 15		-84.3956	-88.9108	Response
63/004	Placebo	<LOD	<LOD	<LOD	28	100	1-28		55.1456	No post sample	No response
63/005	AMG-319 (400mg)	86.9	61.6	15.5	24	96	1-21, 22-24		0	-73.6247	Response
62/006	AMG-319 (400mg)	6323	NS	<LOD	7	30	1-7		Experimental error*1	No post sample	Not evaluable
62/007	AMG-319 (400mg)	117	12.6	108	17	85	1-9, 12-13, 15-20		-79.8305	-51.6127	Response
63/010	AMG-319 (400mg)	119	116	179	20	100	1-20		-74.9872	-60.866	Response
63/011	Placebo	<LOD	0.628	1.78	24	100	1-24		17.3116	-4.35441	No response
62/012	AMG-319 (400mg)	5504	NS	143	23	100	1-23		-79.4163	0	Response
62/013	AMG-319 (400mg)	37.4	17.3	21.4	19	83	1-11, 13-20		-100	-50.0097	Response
62/015	AMG-319 (400mg)	282	NS	3.86	14	64	1-13, 18		-53.6458	No post sample	Response
63/016	Placebo	<LOD	<LOD	<LOD	21	100	1-21		122.566	-76.6081	Response
62/017	AMG-319 (400mg)	146	54.8	81.4	22	100	1-22		-69.1091	-84.7555	Response
49/018	AMG-319 (400mg)	439	NS	<LOD	8	38	1-8		252.399	No post sample	No response
63/019	Placebo	<LOD	<LOD	<LOD	21	100	1-21		100.285	-35.2476	No response
62/020	AMG-319 (400mg)	204	<LOD	<LOD	8	36	1-8		-100	No post sample	Response
63/021	Placebo	<LOD	<LOD	<LOD	19	95	1-18, 20		-8.60975	117.741	No response
49/022	AMG-319 (400mg)	NA	NS	NS	7	32	1-7		-100	No D15 samples	Response
62/025	Placebo	4.88	5.79	2.8	23	100	1-23		-7.27987	No reportable value*2	No response
62/026	AMG-319 (400mg)	84.5	3.57	5.04	8	35	1-8		-100	No post sample	Response
49/027	AMG-319 (400mg)	83.8	3.43	2.43	12	55	1-12		-50.0176	No post sample	Response
62/028	Placebo	<LOD	<LOD	<LOD	23	100	1-23		-16.8314	-3.32904	No response
62/029	AMG-319 (300mg)	42.7	<LOD	<LOD	7	32	1-7		-100	No post sample	Response
62/030	AMG-319 (300mg)	235	51.3	112	23	100	1-23		-100	-66.1625	Response
16/031	Placebo	<LOD	<LOD	<LOD	28	133	1-28		168.75	No reportable value*2	No response
16/032	AMG-319 (300mg)	54	11.9	24.1	24	96	1-12, 14-26		-83.4795	-100	Response
63/033	AMG-319 (300mg)	204	120	101	21	100	1-21		-74.962	-73.5822	Response
16/034	AMG-319 (300mg)	132	<LOD	<LOD	9	36	1-9		201.389	No post sample	No response
16/035	AMG-319 (300mg)	518	<LOD	<LOD	8	31	1-8		No reportable value*2	No post sample	No response

## Sheet: IHC
Trial number	RNAseq identifier	Treatment
	(sample ending 00=pre-treatment, 07=post-treatment)		Median FoxP3
63/001	AMG-240100	placebo	18.5
	AMG-240107		31
63/002	AMG-240200	400 mg AMG319	39
	AMG-240207		25.5
63/003	AMG-240300	400 mg AMG319	185
	AMG-240307
63/004	AMG-240400	placebo	127
	AMG-240407		45.5
63/005	AMG-240500	400 mg AMG319	70.5
	AMG-240507		79
62/006	AMG-240600	400 mg AMG319	59.5
	AMG-240607		13
62/007	AMG-240700	400 mg AMG319	57
	AMG-240707		5
63/010	AMG-241000	400 mg AMG319	28
	AMG-241007		15
63/011	AMG-241100	placebo	30.5
	AMG-241107		39
62/012	AMG-241200	400 mg AMG319	66
	AMG-241207		24
62/013	AMG-241300	400 mg AMG319	74
	AMG-241307		67
62/015	AMG-241500	400 mg AMG319	165
	AMG-241507		165
63/016	AMG-241600	placebo	197
	AMG-241607		265
62/017	AMG-241700	400 mg AMG319	107
	AMG-241707		4.5
49/018	AMG-241800	400 mg AMG319	81
	AMG-241807		80
63/019	AMG-241900	placebo	51
	AMG-241907		203
62/020	AMG-242000	400 mg AMG319	22
	AMG-242007		89
63/021	AMG-242100	placebo	16.5
	AMG-242107		52.5
49/022	AMG-242200	400 mg AMG319	101
	AMG-242207		67
62/025	AMG-242500	placebo	110.5
	AMG-242507		99.5
62/026	AMG-242600	400 mg AMG319	60
	AMG-242607		39.5
49/027	AMG-242700	400 mg AMG319	63
	AMG-242707		65
62/028	AMG-242800	placebo	205
	AMG-242807		32.5
62/029	AMG-242900	300 mg AMG319	71
	AMG-242907		103
62/030	AMG-243000	300 mg AMG319	45
	AMG-243007		4
16/031	AMG-243100	placebo	84.5
	AMG-243107		65
16/032	AMG-243200	300 mg AMG319	64
	AMG-243207		22.5
63/033	AMG-243300	300 mg AMG319	47
	AMG-243307		33.5
16/034	AMG-243400	300 mg AMG319	31
	AMG-243407		24
16/035	AMG-243500	300 mg AMG319	33.5
	AMG-243507		29

## Sheet: Tetanus responses
		Antibody Responses								T cell Responses
Trial Number	Drug/ Placebo		Day 1	Day 8	Day 15	Day 22	Off Study	Overall Response		Trial Number	Drug/ Placebo		Day 8	Day 22	Overall Response at day 22
63/001	Placebo	Titre	0.91	1.06	1.53	1.61	1.53	POSITIVE		63/001	Placebo	Spots	9.72	15.83	NEGATIVE
		Fold			1.443	1.523	1.441					Fold		1.63
63/002	Active	Titre	1.48	1.51	2.45	4.26	3	POSITIVE		63/002	Active	Spots	3.11	0	NEGATIVE
		Fold			1.627	2.826	1.991					Fold		0
63/003	Active	Titre	0.88	0.9	3.85	20.75	5.82	POSITIVE		63/003	Active	Spots	8.33	2.5	NEGATIVE
		Fold			4.279	23.074	6.473					Fold		0.3
63/004	Placebo	Titre	3.1	2.36	4.53	26.38	17.4	POSITIVE		63/004	Placebo	Spots	16.11	14.17	NEGATIVE
		Fold			1.92	11.179	7.374					Fold		0.88
63/005	Active	Titre	1.67	1.79	2.6	7.32	3.56	POSITIVE		63/005	Active	Spots	5.56	1.94	NEGATIVE
		Fold			1.447	4.078	1.987					Fold		0.35
62/006	Active	Titre	0.02	0.02	No sample	0.03	0.02	NEGATIVE		62/006	Active	Spots	PHA neg	6.67	NEGATIVE
		Fold				1.434	1.155					Fold*2		2
62/007	Active	Titre	8.2	8.37	9.79	16.23	11.81	POSITIVE		62/007	Active	Spots	0	2.86	NEGATIVE
		Fold			1.171	1.94	1.411					Fold		2.86
63/010	Active	Titre	0.02	0.02	0.02	0.02	0.02	No result as no vaccine given		63/010	Active	Spots	6.39	4.72	No result as no vaccine given
		Fold			1.11	1.033	1.254					Fold		0.74
63/011	Placebo	Titre	1.82	1.83	2.36	4.14	2.51	POSITIVE		63/011	Placebo	Spots	12.78	30.83	NEGATIVE
		Fold			1.29	2.263	1.371					Fold		2.41
62/012	Active	Titre	0.03	0.02	0.02	0.02	0.05	NEGATIVE		62/012	Active	Spots	0	0	NEGATIVE
		Fold			0.867	0.83	2.361					Fold		0
62/013	Active	Titre	1.475	1.764	4.688	13.728	5.726	POSITIVE		62/013	Active	Spots	7.5	PHA neg	No result as positive control negative
		Fold			2.658	7.782	3.246					Fold		0.36
62/015	Active	Titre	0.028	0.034	No sample	0.045	0.058	NEGATIVE		62/015	Active	Spots	1.67	5	NEGATIVE
		Fold				1.305	1.696					Fold		3
63/016	Placebo	Titre	0.476	0.447	0.423	0.519	0.557	NEGATIVE		63/016	Placebo	Spots	10.28	23.33	NEGATIVE
		Fold			0.946	1.161	1.247					Fold		2.27
62/017	Active	Titre	1.219	1.21	5.489	17.201	9.563	POSITIVE		62/017	Active	Spots	15.24	63.33	POSITIVE
		Fold			4.537	14.218	7.904					Fold		4.15
49/018	Active	Titre	2.26	2.07	No sample	6.344	3.396	POSITIVE		49/018	Active	Spots	10	0	NEGATIVE
		Fold				3.065	1.64					Fold		0
63/019	Placebo	Titre	2.134	1.234	9.583	27.77	No sample	POSITIVE		63/019	Placebo	Spots	198.33	110	NEGATIVE
		Fold			7.769	22.513						Fold		0.55
62/020	Active	Titre	0.039	0.016	0.021	1.369	0.358	POSITIVE		62/020	Active	Spots	14.17	0	NEGATIVE
		Fold			1.334	85.792	22.42					Fold		0
63/021	Placebo	Titre	1.731	1.571	1.341	2.306	3.174	POSITIVE		63/021	Placebo	Spots	3.89	4.17	NEGATIVE
		Fold			0.853	1.467	2.02					Fold		1.07
49/022	Active	Titre	0.965	0.93	No sample	No sample	No sample	Not evaluable		49/022	Active	Spots	20.56	No sample	Not evaluable
		Fold										Fold
62/025	Placebo	Titre	1.392	1.493	1.98	10.988	9.119	POSITIVE		62/025	Placebo	Spots	57.5	43.33	NEGATIVE
		Fold			1.326	7.358	6.106					Fold		0.75
62/026	Active	Titre	1.947	0.835	3.411	12.981	5.278	POSITIVE		62/026	Active	Spots	41.67	3.06	NEGATIVE
		Fold			4.087	15.551	6.322					Fold		0.07
49/027	Active	Titre	8.398	7.955	9.599	14.243	12.942	POSITIVE		49/027	Active	Spots	0	3.06	NEGATIVE
		Fold			1.207	1.79	1.627					Fold		3.06
62/028	Placebo	Titre	1.954	1.854	10.44	23.932	10.962	POSITIVE		62/028	Placebo	Spots	69.17	140.83	NEGATIVE
		Fold			5.632	12.911	5.914					Fold		2.04
62/029	Active	Titre	1.344	1.793	16.778	27.239	20.02	POSITIVE		62/029	Active	Spots	0	14.17	POSITIVE
		Fold			9.357	15.191	11.165					Fold		14.17
62/030	Active	Titre	1.589	1.758	1.349	21.963	6.117	POSITIVE		62/030	Active	Spots	0	2.94	NEGATIVE
		Fold			0.767	12.493	3.479					Fold		2.94
16/031	Placebo	Titre	3.088	3.108	3.023	3.035	2.762	NEGATIVE		16/031	Placebo	Spots	0	1.94	NEGATIVE
		Fold			0.973	0.976	0.888					Fold		1.94
13/032	Active	Titre	0.273	0.259	0.683	8.369	1.275	POSITIVE		13/032	Active	Spots	10	14.17	NEGATIVE
		Fold			2.643	32.368	4.931					Fold		1.42
63/033	Active	Titre	0.144	0.147	0.152	0.395	0.33	POSITIVE		63/033	Active	Spots	30	8.89	NEGATIVE
		Fold			1.038	2.688	2.247					Fold		0.3
16/034	Active	Titre	1.999	2.109	1.863	8.082	5.603	POSITIVE		16/034	Active	Spots	68.33	140.83	POSITIVE
		Fold			0.883	3.832	2.656					Fold		2.06
16/035	Active	Titre	2.009	1.887	11.046	14.281	No sample	POSITIVE		16/035	Active	Spots	109.17	25	NEGATIVE
		Fold			5.852	7.566						Fold		0.23
